# Supplementary material for: Intermolecular exo -selective Diels–Alder reaction catalysed by dual-functional Brønsted acid: conformational restriction of transition states by hydrogen bonds as the key interaction
Source: Royal Society of Chemistry journal article supplement (doi:10.1039/d3ra07688a), 2023-01-01
Supplement: d3ra07688a1.pdf [file d3ra07688a1.pdf]

# Electronic Supplementary Information

## Intermolecular *exo*-Selective Diels-Alder Reaction Catalysed by Dual-Functional Brønsted Acid: Conformational Restriction of Transition States by Hydrogen Bonds as the Key Interaction

Taishi Nakanishi, Masahiro Terada\*

e-mail: mterada@tohoku.ac.jp

Department of Chemistry, Graduate School of Science, Tohoku University,  
Aoba-ku, Sendai 980-8578, Japan.

### Contents

1. General information
2. Preparation of substrates
3. Typical procedure for *exo*-selective Diels-Alder reaction of 2-vinylquinolines with amidedienes
4. Computational study by DFT calculations
5. Determination of relative configurations
6. Catalyst screening for enantioselective reaction
7. Reference
8. NMR spectra
9. HPLC charts

## 1. General information

All reactions were carried out under nitrogen atmosphere in flame-dried glassware. Toluene (tol), dichloromethane (DCM) and tetrahydrofuran (THF) were supplied from KANTO Chemical Co., Inc. as “Dehydrated solvent system”. Other solvents and reagents were purchased from commercial suppliers (Wako Pure Chemical Industries, Ltd., Tokyo Chemical Industry Co., LTD., Aldrich Inc., and others) and used without further purification. Purification of reaction products was carried out by flash column chromatography using silica gel 60 N (Merck 40-63  $\mu\text{m}$ ). Analytical thin layer chromatography (TLC) was performed on Merck precoated TLC plates (silica gel 60 GF 254, 0.25 mm).  $^1\text{H}$  NMR spectra were recorded on a JEOL ECA-600 (600 MHz) spectrometer. Chemical shifts are reported in ppm from tetramethylsilane or solvent resonance as the internal standard ( $\text{CDCl}_3$ : 7.26 ppm, TMS: 0.00 ppm).  $^{13}\text{C}$  NMR spectra were recorded on a JEOL ECA-600 (150 MHz) spectrometer with complete proton decoupling. Chemical shifts are reported in ppm from the solvent resonance as the internal standard ( $\text{CDCl}_3$ : 77.2 ppm).  $^{31}\text{P}$  NMR spectra were recorded on a JEOL JNM-ECA600 (243 MHz) spectrometer with complete proton decoupling. Infrared spectra were recorded on a Jasco FT/IR-4100 spectrometer. Chiral stationary phase HPLC analysis was performed on a Jasco LC-2000 Plus Series system with DACIEL chiral analytical column (4.6 mm $\Phi$ \* 250 mm length). Optical rotations were measured on a Jasco P-1020 digital polarimeter with a sodium lamp and reported as follows;  $[\alpha]^{T^\circ\text{C}}_D$  ( $c = \text{g}/100 \text{ mL}$ , solvent, % ee). High resolution mass spectra analysis was performed on a Bruker Daltonics solariX 9.4T FT-ICR-MS spectrometer and a JEOL JMST100GCV Time-of-Flight Mass Spectrometer at the Research and Analytical Center for Giant Molecules, Graduate School of Science, Tohoku University.

## 2. Preparation of substrates

**1a** was synthesized from corresponding 2-methyl quinoline derivatives **S1a**.

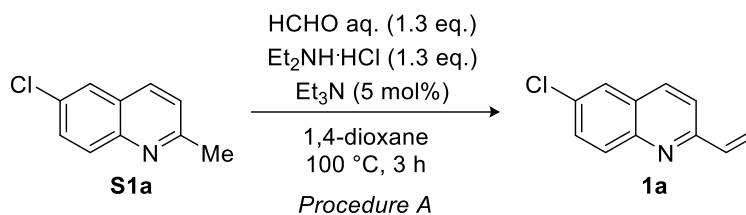

The procedure for the synthesis of **1a** was shown below. This procedure was slightly modified from Feng's method<sup>[1]</sup>.

To a flame-dried 50 mL round-bottom flask with a magnetic stirrer bar, 6-chloro-2-methylquinoline (**S1a**) (888 mg, 5.0 mmol), HCHO (30% in H<sub>2</sub>O, 6.5 mmol, 1.3 eq.), Et<sub>2</sub>NH·HCl (713 mg, 6.5 mmol, 1.3 eq.), Et<sub>3</sub>N (35  $\mu$ L, 0.25 mmol, 5 mol %) and 1,4-dioxane (10 mL) were added. This suspension was heated to 100 °C until the starting material **S1a** was fully consumed (checked by TLC). After cooling to room temperature, H<sub>2</sub>O (15 mL) was added, and extracted with dichloromethane (10 mL \* 3 times). The combined organic layers were dried over MgSO<sub>4</sub>, and the solvent was removed under reduced pressure. The residue was purified by column chromatography using hexane/ethyl acetate (14/1) as the eluent yielding the 6-chloro-2-vinylquinoline **1a** (616 mg, 3.8 mmol, 65% yield). **1a** was stored at -20 °C under Ar atmosphere.

### 6-Chloro-2-vinylquinoline (**1a**)

white solid;  $R_f$  = 0.40 (Hexane/EtOAc = 6/1); <sup>1</sup>H NMR (600 MHz, CDCl<sub>3</sub>)  $\delta$  8.02 (d,  $J$  = 8.4 Hz, 1H), 7.99 (d,  $J$  = 8.4 Hz, 1H), 7.76 (d,  $J$  = 2.4 Hz, 1H), 7.65-7.58 (m, 2H), 7.01 (dd,  $J$  = 17.4, 10.8 Hz, 1H), 6.29 (d,  $J$  = 17.4 Hz, 1H), 5.69 (d,  $J$  = 10.6 Hz, 1H); <sup>13</sup>C NMR (150 MHz, CDCl<sub>3</sub>)  $\delta$  156.4, 146.5, 137.7, 135.6, 132.1, 131.1, 130.7, 128.1, 126.3, 120.5, 119.5; IR (ATR) 3089, 3053, 3020, 2990, 1849, 1592, 1556, 1493, 1421, 1382, 1308, 1192, 1073, 993, 924, 903, 831, 726 cm<sup>-1</sup>; HRMS (FD+)  $m/z$ : [M+H]<sup>+</sup> Calcd for C<sub>11</sub>H<sub>8</sub>ClN 189.03453, found: 189.034498.

Amidodienes (**2**) were prepared following literature from corresponding carboxylic acids<sup>[2]</sup>.

To a solution of corresponding carboxylic acid (1.0 eq.) in DMF (0.5 M) was added NEt<sub>3</sub> (1.1 eq.) and diphenyl phosphoryl azido (1.1 eq.) dropwise at 0 °C and the reaction was allowed to stir for 1 h at the same temperature. Then corresponding benzyl alcohol (3.0 eq.) was added, and the reaction was heated to 85 °C for 4 h. The reaction was quenched with water and extracted with hexane/EA = 3/1. The combined organic layers were washed with water and brine, dried over Na<sub>2</sub>SO<sub>4</sub>, concentrated in vacuo, and purified by silica-gel chromatography (hexane/AcOEt = 40/1 to 20/1) to afford the amidodienes in moderate yield.

### Methyl (*E*)-buta-1,3-dien-1-ylcarbamate (**2a**)

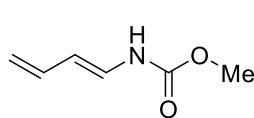

white solid;  $R_f = 0.18$  (Hexane/EtOAc= 6/1);  $^1\text{H NMR}$  (600 MHz,  $\text{CDCl}_3$ )  $\delta$  6.75 (t,  $J = 13.2$  Hz, 1H), 6.54 (brs, 1H), 6.32-6.21 (m, 1H), 5.70 (t,  $J = 13.2$  Hz, 1H), 5.04 (dd,  $J = 16.8, 10.2$  Hz, 1H), 4.91 (d,  $J = 10.2$  Hz, 1H), 3.74 (s, 3H);  $^{13}\text{C NMR}$  (150 MHz,  $\text{CDCl}_3$ )  $\delta$  154.1, 134.6, 127.2, 113.6, 112.1, 52.8; IR (ATR) 3281, 3080, 3032, 3000, 2950, 1726, 1698, 1670, 1536, 1437, 1316, 1303, 1280, 1239, 1088, 1059, 1003, 938, 866, 769, 676  $\text{cm}^{-1}$ ; HRMS (FD+)  $m/z$ :  $[\text{M}+\text{H}]^+$  Calcd for  $\text{C}_6\text{H}_9\text{NO}_2$  127.06333, found: 127.06327.

\* **2a** showed multiple resonance for the presence of different rotational isomers at 20 °C.

### Methyl (*E*)-(2-methylbuta-1,3-dien-1-yl)carbamate (**2b**)

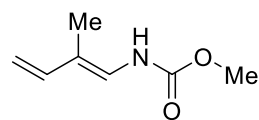

white solid;  $R_f = 0.32$  (Hexane/EtOAc= 6/1);  $^1\text{H NMR}$  (600 MHz,  $\text{CDCl}_3$ )  $\delta$  6.62 (d,  $J = 10.8$  Hz, 1H), 6.34 (dd,  $J = 17.4, 10.8$  Hz, 2H), 5.01 (d,  $J = 17.4$  Hz, 1H), 4.89 (d,  $J = 10.8$  Hz, 1H), 3.74 (s, 3H), 1.67 (s, 3H);  $^{13}\text{C NMR}$  (150 MHz,  $\text{CDCl}_3$ )  $\delta$  154.1, 138.2, 124.6, 115.5, 109.6, 52.9, 10.2; IR (ATR) 3328, 3088, 2955, 1713, 1660, 1508, 1451, 1359, 1237, 1054, 985, 879, 772  $\text{cm}^{-1}$ ; HRMS (FD+)  $m/z$ :  $[\text{M}+\text{H}]^+$  Calcd for  $\text{C}_7\text{H}_{11}\text{NO}_2$  141.07898, found: 141.07897.

\* **2b** showed multiple resonance for the presence of different rotational isomers at 20 °C.

### Methyl (*Z*)-(2-(phenylthio)buta-1,3-dien-1-yl)carbamate (**2g**)

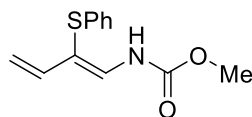

pale yellow oil;  $R_f = 0.38$  (Hexane/EtOAc= 6/1);  $^1\text{H NMR}$  (600 MHz,  $\text{CDCl}_3$ )  $\delta$  7.51 (d,  $J = 10.2$  Hz, 1H), 7.41 (d,  $J = 10.2$  Hz, 1H), 7.24 (t,  $J = 7.8$  Hz, 2H), 7.18-7.08 (m, 3H), 6.46 (dd,  $J = 16.2, 10.2$  Hz, 1H), 5.44 (d,  $J = 16.2$  Hz, 1H), 5.00 (d,  $J = 10.2$  Hz, 1H), 3.76 (s, 3H);  $^{13}\text{C NMR}$  (150 MHz,  $\text{CDCl}_3$ )  $\delta$  153.7, 134.7, 134.4, 134.1, 129.2, 126.5, 125.7, 113.7, 110.1, 53.2; IR (ATR) 3346, 3058, 3004, 2955, 1731, 1632, 1476, 1326, 1218, 1069, 1025, 894, 769, 742, 690  $\text{cm}^{-1}$ ; HRMS (FD+)  $m/z$ :  $[\text{M}+\text{H}]^+$  Calcd for  $\text{C}_{12}\text{H}_{13}\text{NO}_2\text{S}$  235.06670, found: 235.06668.

\* **2g** showed multiple resonance for the presence of different rotational isomers at 20 °C.

### Methyl (*E*)-(3-methylbuta-1,3-dien-1-yl)carbamate (**2h**)

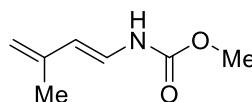

white solid;  $R_f = 0.22$  (Hexane/EtOAc= 6/1);  $^1\text{H NMR}$  (600 MHz,  $\text{CDCl}_3$ )  $\delta$  6.71 (dd,  $J = 13.8, 11.4$  Hz, 1H), 6.46 (brs, 1H), 5.78 (d,  $J = 13.8$  Hz, 1H), 4.80 (d,  $J = 4.8$  Hz, 2H), 3.74 (s, 3H), 1.86 (s, 3H);  $^{13}\text{C NMR}$  (150 MHz,  $\text{CDCl}_3$ )  $\delta$  154.3, 140.4, 124.2, 114.2, 113.4, 52.8, 18.9; IR (ATR) 3312, 3075, 3028, 2975, 2952, 2918, 2846, 1723, 1698, 1656, 1530, 1449, 1305, 1246, 1069, 949, 861, 771, 693  $\text{cm}^{-1}$ ; HRMS (FD+)  $m/z$ :  $[\text{M}+\text{H}]^+$  Calcd for  $\text{C}_7\text{H}_{11}\text{NO}_2$  141.07898, found: 141.07894.

\* **2h** showed multiple resonance for the presence of different rotational isomers at 20 °C.

***tert*-Butyl (*E*)-(2-methylbuta-1,3-dien-1-yl)carbamate (**2i**)**

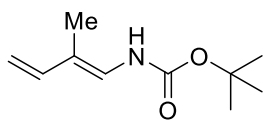

white solid;  $R_f = 0.48$  (Hexane/EtOAc= 6/1);  $^1\text{H NMR}$  (600 MHz,  $\text{CDCl}_3$ )  $\delta$  6.61 (d,  $J = 10.8$  Hz, 1H), 6.35 (dd,  $J = 16.8, 10.8$  Hz, 1H), 6.21 (d,  $J = 8.4$  Hz, 1H), 4.99 (d,  $J = 16.8$  Hz, 1H), 4.87 (d,  $J = 10.8$  Hz, 1H), 1.67 (s, 3H), 1.49 (s, 9H);  $^{13}\text{C NMR}$  (150 MHz,  $\text{CDCl}_3$ )  $\delta$  152.6, 138.6, 124.8, 114.6, 108.9, 81.0, 28.4, 10.2; IR (ATR) 3288, 3092, 3003, 2981, 2930, 1710, 1682, 1655, 1509, 1392, 1366, 1269, 1249, 1158, 1051, 989, 876, 777, 693  $\text{cm}^{-1}$ ; HRMS (FD+)  $m/z$ :  $[\text{M}+\text{H}]^+$  Calcd for  $\text{C}_{10}\text{H}_{17}\text{NO}_2$  183.12593, found: 183.12588.

\* **2i** showed multiple resonance for the presence of different rotational isomers at 20 °C.

**(*R*)-2,6-dibenzyl-4-hydroxydinaphtho[2,1-d:1',2'-f][1,3,2]dioxaphosphepine 4-oxide (**5**)**

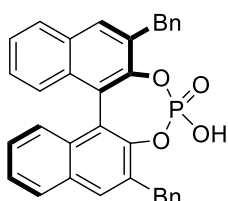

white solid;  $[\alpha]_{\text{D}}^{23.0} = -286.0$  ( $c = 1.0$ ,  $\text{CHCl}_3$ , >99% ee);  $R_f = 0.08$  (EtOAc);  $^1\text{H NMR}$  (600 MHz,  $\text{CDCl}_3$ )  $\delta$  7.76 (d,  $J = 7.8$  Hz, 2H), 7.56 (s, 2H), 7.39 (t,  $J = 7.8$  Hz, 2H), 7.29-7.25 (m, 6H), 7.25-7.15 (m, 8H), 6.25 (brs, 1H), 4.42 (d,  $J = 16.2$  Hz, 2H), 4.25 (d,  $J = 16.2$  Hz, 2H);  $^{13}\text{C NMR}$  (150 MHz,  $\text{CDCl}_3$ )  $\delta$  145.8 (d, *diastereotopic*), 139.1, 133.0, 131.8, 131.3, 130.8, 129.8, 128.7, 128.2, 127.2, 126.5, 126.2, 125.9, 121.9, 36.5;  $^{31}\text{P NMR}$  (243 MHz,  $\text{CDCl}_3$ )  $\delta$  5.73; IR (ATR) 3060, 3027, 2904, 1714, 1600, 1496, 1453, 1421, 1335, 1267, 1230, 1178, 1147, 1097, 1077, 1014, 971, 927, 908, 887, 750, 701  $\text{cm}^{-1}$ ; HRMS (FD+)  $m/z$ :  $[\text{M}+\text{H}]^+$  Calcd for  $\text{C}_{34}\text{H}_{25}\text{O}_4\text{P}$  528.14904, found: 528.14895.

### 3. Typical procedure for *exo*-selective Diels-Alder reaction of 2-vinylquinoline with amidediene

Representative procedure for the asymmetric Diels-Alder reaction of 6-chloro-2-vinyl quinoline **1a** with amidediene **2b** catalysed by diphenyl phosphate.

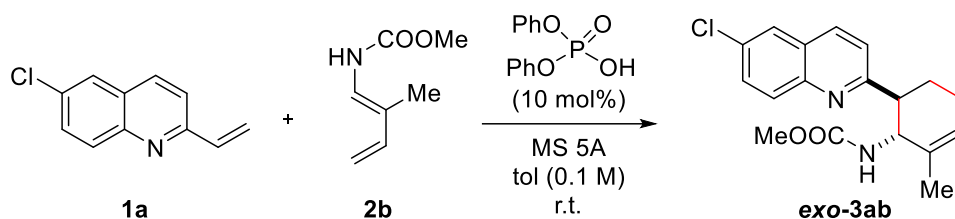

To a solution of **1a** (19.0 mg, 0.1 mmol), **2b** (17.0 mg, 0.12 mmol) and pre-activated MS 5A (50 mg) in dry toluene (1.0 ml), diphenyl phosphate (2.5 mg, 10 mol %) was added. The reaction mixture was stirred at room temperature for 48 h. After 48 h, Et<sub>3</sub>N (ca. 0.1 mL) was added. This suspension was filtered through celite® (washed by EtOAc) and the solvent was removed under reduced pressure. A corresponding crude residue was purified by column chromatography using hexane/ethyl acetate (4/1 to 2/1) as the eluent to give **3ab** (23.2 mg, 0.07 mmol, 70%) as a mixture of diastereomers. The diastereomeric excess was determined by analysis of crude NMR. The diastereomers were further separated by preparative HPLC using hexane/EtOAc = 7/2 as an eluent.

**In all cases, Diels-Alder adducts show multiple resonance for the presence of different rotational isomers at 20 °C.**

#### Methyl (6-(6-chloroquinolin-2-yl)cyclohex-2-en-1-yl)carbamate (*exo*-3aa)

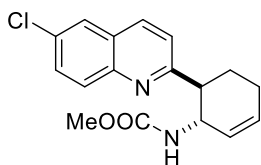

white solid; R<sub>f</sub> = 0.10 (Hexane/EtOAc = 6/1); <sup>1</sup>H NMR (600 MHz, CDCl<sub>3</sub>) δ 8.04 (d, *J* = 9.0 Hz, 1H), 7.97 (d, *J* = 9.0 Hz, 1H), 7.78 (d, *J* = 2.4 Hz, 1H), 7.62 (dd, *J* = 9.0, 2.4 Hz, 1H), 7.44 (d, *J* = 7.8 Hz, 1H), 5.91-5.86 (m, 1H), 5.74 (d, *J* = 9.6 Hz, 1H), 4.81 (d, *J* = 6.6 Hz, 1H), 4.75-4.65 (m, 1H), 3.46 (s, 3H), 3.12-3.02 (m, 1H), 2.33-2.01 (m, 4H); <sup>13</sup>C NMR (150 MHz, CDCl<sub>3</sub>) δ 163.6, 156.6, 146.2, 135.9, 131.8, 130.8, 130.4, 129.2, 129.1, 127.9,

126.4, 120.6, 52.0, 49.8, 28.7, 25.2, one carbon was not found probably due to overlapping; IR (ATR) 3313, 3027, 2938, 2839, 1696, 1599, 1542, 1491, 1451, 1317, 1256, 1190, 1073, 1054, 1026, 878, 831, 758 cm<sup>-1</sup>; HRMS (FD+) *m/z*: [M+H]<sup>+</sup> Calcd for C<sub>17</sub>H<sub>17</sub>ClN<sub>2</sub>O<sub>2</sub> 316.09785, found: 316.09781.

\* **exo-3aa showed multiple resonance for the presence of different rotational isomers at 20 °C.**

**Methyl (6-(6-chloroquinolin-2-yl)cyclohex-2-en-1-yl)carbamate (*endo*-3aa)**

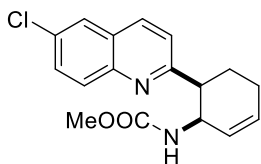

colorless oil;  $R_f = 0.12$  (Hexane/EtOAc= 6/1);  $^1\text{H NMR}$  (600 MHz,  $\text{CDCl}_3$ )  $\delta$  7.99 (t,  $J = 9.6$  Hz, 2H), 7.76 (d,  $J = 2.4$  Hz, 1H), 7.61 (d,  $J = 9.0$  Hz, 1H), 7.39 (d,  $J = 9.0$  Hz, 1H), 5.89 (s, 2H), 5.45 (d,  $J = 8.4$  Hz, 1H), 4.64 (s, 1H), 3.46-3.37 (m, 1H), 3.36 (s, 3H), 2.30-1.98 (m, 4H);  $^{13}\text{C NMR}$  (150 MHz,  $\text{CDCl}_3$ )  $\delta$  162.6, 156.5, 146.0, 135.2, 131.7, 131.0, 130.2, 129.8, 127.9, 127.6, 126.3, 122.4, 51.9, 48.7, 45.8, 24.7, 23.4; IR (ATR) 3328, 3026, 2946, 2837, 1712, 1599, 1492, 1454, 1337, 1239, 1190, 1073, 834, 756  $\text{cm}^{-1}$ ; HRMS (FD+)  $m/z$ :  $[\text{M}+\text{H}]^+$  Calcd for  $\text{C}_{17}\text{H}_{17}\text{ClN}_2\text{O}_2$  316.09785, found: 316.09777.

\* ***endo*-3aa showed multiple resonance for the presence of different rotational isomers at 20 °C.**

**Methyl (6-(6-chloroquinolin-2-yl)-2-methylcyclohex-2-en-1-yl)carbamate (*exo*-3ab)**

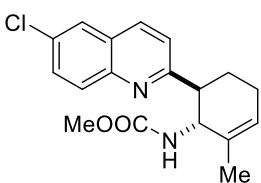

white solid;  $[\alpha]_D^{23.0} = -79.8$  ( $c = 1.0$ ,  $\text{CHCl}_3$ , 81% ee);  $R_f = 0.12$  (Hexane/EtOAc= 6/1);  $^1\text{H NMR}$  (600 MHz,  $\text{CDCl}_3$ )  $\delta$  8.02 (d,  $J = 9.0$  Hz, 1H), 7.96 (d,  $J = 9.0$  Hz, 1H), 7.77 (d,  $J = 2.4$  Hz, 1H), 7.39 (dd,  $J = 9.0, 2.4$  Hz, 1H), 7.43 (d,  $J = 9.0$  Hz, 1H), 5.63 (s, 1H), 4.69 (dd,  $J = 9.0, 9.0$  Hz, 1H), 4.64 (d,  $J = 9.0$  Hz, 1H), 3.47 (s, 3H), 3.20 (ddd,  $J = 10.2, 9.0, 3.6$  Hz, 1H), 2.25-1.97 (m, 4H), 1.77 (s, 3H);  $^{13}\text{C NMR}$  (150 MHz,  $\text{CDCl}_3$ )  $\delta$  163.8, 156.9, 146.2, 135.7, 134.2, 131.6, 130.8, 130.3, 127.8, 126.3, 125.2, 120.8, 54.5, 52.1, 50.1, 28.3, 24.9, 20.3; IR (ATR) 3309, 2969, 2949, 2914, 2844, 1692, 1599, 1543, 1489, 1316, 1265, 1234, 1193, 1074, 1034, 876, 829, 775, 689  $\text{cm}^{-1}$ ; HRMS (FD+)  $m/z$ :  $[\text{M}+\text{H}]^+$  Calcd for  $\text{C}_{18}\text{H}_{19}\text{ClN}_2\text{O}_2$  330.11350, found: 330.11341; HPLC analysis CHIRALCEL OD-3 (Hexane:*i*PrOH = 97/3, 1.0 mL/min, 40 °C, 254 nm) 10.3 min (minor), 13.0 min (major).

\* ***exo*-3ab showed multiple resonance for the presence of different rotational isomers at 20 °C.**

**Methyl (6-(6-chloroquinolin-2-yl)-2-methylcyclohex-2-en-1-yl)carbamate (*endo*-3ab)**

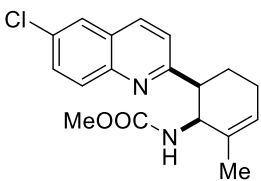

colorless oil;  $R_f = 0.15$  (Hexane/EtOAc= 6/1);  $^1\text{H NMR}$  (600 MHz,  $\text{CDCl}_3$ )  $\delta$  7.98 (t,  $J = 9.0$  Hz, 2H), 7.76 (d,  $J = 2.4$  Hz, 1H), 7.60 (dd,  $J = 9.0, 2.4$  Hz, 1H), 7.40 (d,  $J = 9.0, 2.4$  Hz, 1H), 5.61 (s, 1H), 4.97 (d,  $J = 10.2$  Hz, 1H), 4.50 (dd,  $J = 10.2, 4.2$  Hz, 1H), 3.37 (ddd,  $J = 12.6, 4.2, 3.0$  Hz, 1H), 3.28 (s, 3H), 2.23-1.95 (m, 4H), 1.79 (s, 3H);  $^{13}\text{C NMR}$  (150 MHz,  $\text{CDCl}_3$ )  $\delta$  162.7, 156.8, 146.1, 135.0, 134.2, 131.5, 131.0, 130.1, 127.6, 126.4, 124.9, 122.3, 52.6, 52.0, 47.1, 25.1, 22.3, 21.2; IR (ATR) 3325, 2942, 2915, 2838, 1721, 1599, 1507, 1453, 1336, 1236, 1192, 1074, 878, 831, 759  $\text{cm}^{-1}$ ; HRMS (FD+)  $m/z$ :  $[\text{M}+\text{H}]^+$  Calcd for  $\text{C}_{18}\text{H}_{19}\text{ClN}_2\text{O}_2$  330.11350, found: 330.11344.

\* ***endo*-3ab showed multiple resonance for the presence of different rotational isomers at 20 °C.**

**Methyl (-6-(6-chloroquinolin-2-yl)-2-(phenylthio)cyclohex-2-en-1-yl)carbamate (*exo*-3ag)**

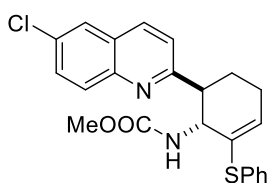

white solid;  $R_f = 0.08$  (Hexane/EtOAc= 6/1);  $^1\text{H NMR}$  (600 MHz,  $\text{CDCl}_3$ )  $\delta$  7.97 (d,  $J = 8.4$  Hz, 1H), 7.94 (d,  $J = 9.0$  Hz, 1H), 7.76 (d,  $J = 2.4$  Hz, 1H), 7.61 (dd,  $J = 9.0, 2.4$  Hz, 1H), 7.37 (d,  $J = 8.4$  Hz, 3H), 7.26-7.19 (m, 3H), 6.18 (s, 1H), 4.84-4.73 (m, 2H), 3.48 (s, 4H), 2.41-2.26 (m, 2H), 2.24-2.12 (m, 1H), 2.07-2.01 (m, 1H);  $^{13}\text{C NMR}$  (150 MHz,  $\text{CDCl}_3$ )  $\delta$  162.8, 156.5, 146.2, 135.8, 135.5, 134.6, 133.1, 131.7, 131.3, 130.9, 130.3, 129.1, 127.8, 127.2, 126.3, 121.4, 53.7, 52.2, 49.2, 26.2, 26.0; IR (ATR) 3423, 3329, 3057, 3018, 2945, 2836, 1720, 1599, 1491, 1307, 1237, 1192, 1075, 1026, 878, 833, 751, 691  $\text{cm}^{-1}$ ; HRMS (FD+)  $m/z$ :  $[\text{M}+\text{H}]^+$  Calcd for  $\text{C}_{23}\text{H}_{21}\text{ClN}_2\text{O}_2\text{S}$  424.10123, found: 424.10112.

\* *exo*-3ag showed multiple resonance for the presence of different rotational isomers at 20 °C.

**Methyl (-6-(6-chloroquinolin-2-yl)-2-(phenylthio)cyclohex-2-en-1-yl)carbamate (*endo*-3ag)**

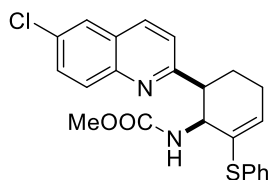

colorless oil;  $R_f = 0.10$  (Hexane/EtOAc= 6/1);  $^1\text{H NMR}$  (600 MHz,  $\text{CDCl}_3$ , VT50)  $\delta$  7.93 (dd,  $J = 8.4, 4.8$  Hz, 2H), 7.72 (s, 1H), 7.58 (dd,  $J = 8.4, 2.4$  Hz, 1H), 7.43 (d,  $J = 7.2$  Hz, 2H), 7.30 (t,  $J = 8.4$  Hz, 3H), 7.24 (t,  $J = 7.2$  Hz, 1H), 6.14 (s, 1H), 5.08 (brs, 1H), 4.71 (brs, 1H), 3.44 (d,  $J = 3.0$  Hz, 1H), 3.25 (brs, 3H), 2.27 (brs, 2H), 2.20-2.06 (m, 2H);  $^{13}\text{C NMR}$  (150 MHz,  $\text{CDCl}_3$ )  $\delta$  161.7, 156.3, 146.0, 135.1, 134.5, 134.4, 134.0, 131.7, 131.0, 130.1, 129.2, 127.6, 127.4, 126.3, 122.3, 52.2, 52.0, 47.4, 26.2, 22.5, one carbon was not found probably due to overlapping; IR (ATR) 3424, 3329, 3056, 3018, 2949, 2906, 2833, 1721, 1599, 1492, 1340, 1222, 1191, 1074, 1061, 879, 832, 753, 692  $\text{cm}^{-1}$ ; HRMS (FD+)  $m/z$ :  $[\text{M}+\text{H}]^+$  Calcd for  $\text{C}_{23}\text{H}_{21}\text{ClN}_2\text{O}_2\text{S}$  424.10123, found: 424.10118.

\* *endo*-3ag showed multiple resonance for the presence of different rotational isomers even at 50 °C.

**Methyl (6-(6-chloroquinolin-2-yl)-2-methylcyclohex-2-en-1-yl)carbamate (*exo*-3ah)**

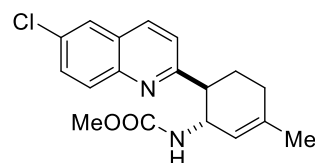

white solid;  $R_f = 0.12$  (Hexane/EtOAc= 6/1);  $^1\text{H NMR}$  (600 MHz,  $\text{CDCl}_3$ )  $\delta$  8.03 (d,  $J = 8.4$  Hz, 1H), 7.96 (d,  $J = 9.0$  Hz, 1H), 7.77 (d,  $J = 2.4$  Hz, 1H), 7.61 (dd,  $J = 9.0, 2.4$  Hz, 1H), 7.43 (d,  $J = 8.4$  Hz, 1H), 5.45 (s, 1H), 4.81 (d,  $J = 7.2$  Hz, 1H), 4.67 (brs, 1H), 3.45 (s, 3H), 3.04-2.83 (m, 1H), 2.25-2.16 (m, 1H), 2.11-1.99 (m, 3H), 1.74 (s, 3H);  $^{13}\text{C NMR}$  (150 MHz,  $\text{CDCl}_3$ )  $\delta$  163.7, 156.2, 146.2, 137.0, 135.8, 131.7, 131.8, 130.4, 127.9, 126.3, 123.4, 120.5, 52.4, 52.0, 49.8, 30.0, 28.8, 23.3; IR (ATR) 3315, 2935, 2910, 2837, 1695, 1598, 1535, 1490, 1452, 1318, 1254, 1229, 1192, 1128, 1075, 1037, 878, 830, 759  $\text{cm}^{-1}$ ; HRMS (FD+)  $m/z$ :  $[\text{M}+\text{H}]^+$  Calcd for  $\text{C}_{18}\text{H}_{19}\text{ClN}_2\text{O}_2$  330.11350, found: 330.11348.

\* *exo*-3ah showed multiple resonance for the presence of different rotational isomers at 20 °C.



**Methyl (6-(6-chloroquinolin-2-yl)-2-methylcyclohex-2-en-1-yl)carbamate (*endo*-3ah)**

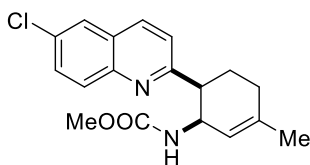

white solid;  $R_f = 0.15$  (Hexane/EtOAc= 6/1);  $^1\text{H NMR}$  (600 MHz,  $\text{CDCl}_3$ )  $\delta$  8.00-7.93 (m, 2H), 7.75 (d,  $J = 2.4$  Hz, 1H), 7.60 (d,  $J = 9.0$  Hz, 1H), 7.38 (d,  $J = 7.8$  Hz, 1H), 5.63 (s, 1H), 5.26 (d,  $J = 7.8$  Hz, 1H), 4.59 (s, 1H), 3.21 (s, 4H), 2.17-1.97 (m, 4H), 1.73 (s, 3H);  $^{13}\text{C NMR}$  (150 MHz,  $\text{CDCl}_3$ )  $\delta$  162.8, 156.4, 146.1, 137.8, 135.1, 131.6, 131.0, 130.1, 127.6, 126.3, 122.5, 122.1, 51.9, 49.1, 45.8, 29.9, 23.6, 23.3; IR (ATR) 3330, 3013, 2934, 2909, 2833, 1716, 1599, 1492, 1450, 1339, 1308, 1237, 1192, 1074, 972, 878, 834, 759  $\text{cm}^{-1}$ ; HRMS (FD+)  $m/z$ :  $[\text{M}+\text{H}]^+$  Calcd for  $\text{C}_{18}\text{H}_{19}\text{ClN}_2\text{O}_2$  330.11350, found: 330.11342.

\* ***endo*-3ah showed multiple resonance for the presence of different rotational isomers at 20 °C.**

***tert*-Butyl (6-(6-chloroquinolin-2-yl)-2-methylcyclohex-2-en-1-yl)carbamate (*exo*-3ai)**

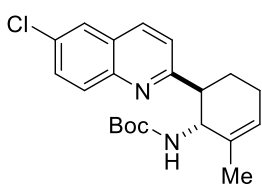

white solid;  $R_f = 0.25$  (Hexane/EtOAc= 6/1);  $^1\text{H NMR}$  (600 MHz,  $\text{CDCl}_3$ )  $\delta$  8.01 (d,  $J = 9.0$  Hz, 1H), 7.96 (d,  $J = 9.0$  Hz, 1H), 7.76 (d,  $J = 2.4$  Hz, 1H), 7.61 (dd,  $J = 9.0, 2.4$  Hz, 1H), 7.44 (d,  $J = 9.0$  Hz, 1H), 5.62 (s, 1H), 4.60 (dd,  $J = 9.0, 9.0$  Hz, 1H), 4.51 (d,  $J = 9.0$  Hz, 1H), 3.20 (ddd,  $J = 10.2, 9.0, 3.0$  Hz, 1H), 2.24-1.94 (m, 4H), 1.77 (s, 3H), 1.20 (s, 9H);  $^{13}\text{C NMR}$  (150 MHz,  $\text{CDCl}_3$ )  $\delta$  164.1, 155.7, 146.2, 135.5, 134.5, 131.5, 130.8, 130.2, 127.8, 126.3, 124.9, 120.9, 79.1, 54.0, 50.3, 28.3, 28.1, 24.9, 20.4; IR (ATR) 3349, 2973, 2937, 2912, 2844, 1678, 1599, 1525, 1490, 1416, 1365, 1319, 1271, 1250, 1233, 1169, 1074, 1017, 999, 828, 764  $\text{cm}^{-1}$ ; HRMS (FD+)  $m/z$ :  $[\text{M}+\text{H}]^+$  Calcd for  $\text{C}_{21}\text{H}_{25}\text{ClN}_2\text{O}_2$  372.16045, found: 372.16039.

\* ***exo*-3ai showed multiple resonance for the presence of different rotational isomers at 20 °C.**

***tert*-Butyl (6-(6-chloroquinolin-2-yl)-2-methylcyclohex-2-en-1-yl)carbamate (*endo*-3ai)**

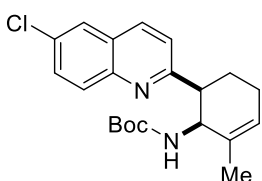

colorless oil;  $R_f = 0.30$  (Hexane/EtOAc= 6/1);  $^1\text{H NMR}$  (600 MHz,  $\text{CDCl}_3$ )  $\delta$  7.99 (t,  $J = 9.0$  Hz, 1H), 7.95 (d,  $J = 9.0$  Hz, 1H), 7.74 (d,  $J = 2.4$  Hz, 1H), 7.59 (dd,  $J = 9.0, 2.4$  Hz, 1H), 7.42 (d,  $J = 9.0$  Hz, 1H), 5.61 (s, 1H), 4.69 (d,  $J = 10.2$  Hz, 1H), 4.43 (dd,  $J = 10.2, 4.2$  Hz, 1H), 3.34 (ddd,  $J = 12.6, 4.2, 3.0$  Hz, 1H), 2.26-1.92 (m, 4H), 1.78 (s, 3H), 1.01 (s, 9H);  $^{13}\text{C NMR}$  (150 MHz,  $\text{CDCl}_3$ )  $\delta$  162.9, 155.3, 146.2, 134.7, 134.4, 131.4, 131.0, 129.9, 127.7, 126.2, 124.9, 122.7, 78.8, 51.9, 47.4, 28.1, 25.4, 21.7, 21.3; IR (ATR) 3438, 2977, 2933, 2837, 1704, 1600, 1492, 1454, 1365, 1238, 1169, 1074, 984, 878, 831, 759  $\text{cm}^{-1}$ ; HRMS (FD+)  $m/z$ :  $[\text{M}+\text{H}]^+$  Calcd for  $\text{C}_{21}\text{H}_{25}\text{ClN}_2\text{O}_2$  372.16045, found: 372.16040.

\* ***endo*-3ai showed multiple resonance for the presence of different rotational isomers at 20 °C.**

## **4. Computational study by DFT calculations**

### **4-1. Method**

All calculations were performed with the Gaussian 16 package<sup>[3]</sup>. Molecular geometries and transition state structures were optimized and characterized using frequency calculations in the gas-phase at the B3LYP-D3/6-31G(d) level of theory<sup>[4,5]</sup>, unless otherwise noted. A manual conformational search has been performed on possible catalyst substrate orientations. Transition state structures were verified by the presence of a single imaginary vibrational frequency.

## 4-2. Summary of energies of transition states

**Table S1.** Summary of model calculations for transition states in the reaction of vinylquinoline **1b** with dienylcarbamates **2a** catalysed by phosphoric acid (*R*)-4

| VQ          | diene     | Reactin-face | TS-name      | A.u.         | kcal/mol     | $\Delta\Delta G^\ddagger$ |
|-------------|-----------|--------------|--------------|--------------|--------------|---------------------------|
| s-TRANS     | cis-cis   | R_endo       | TS-Cc(R-en)  | -2023.265971 | -1269619.629 | 0.44                      |
|             |           | S_endo       | TS-Cc(S-en)  | -2023.265825 | -1269619.538 | 0.53                      |
|             |           | R_exo        | TS-Cc(R-ex)  | -2023.244898 | -1269606.406 | 13.66                     |
|             |           | S_exo        | TS-Cc(S-ex)  | -2023.242306 | -1269604.779 | 15.29                     |
|             | cis-trans | R_endo       | TS-Ct(R-en)  | -2023.260677 | -1269616.307 | 3.76                      |
|             |           | S_endo       | TS-Ct(S-en)  | -2023.260101 | -1269615.946 | 4.12                      |
|             |           | R_exo        | TS-Ct(R-ex)  | -2023.240457 | -1269603.619 | 16.45                     |
|             |           | S_exo        | TS-Ct(S-ex)  | N.D.         | -            | -                         |
|             | trans-cis | R_endo       | TS-Tc(R-en)  | -2023.248883 | -1269608.907 | 11.16                     |
|             |           | S_endo       | TS-Tc(S-en)  | -2023.248044 | -1269608.38  | 11.69                     |
|             |           | R_exo        | TS-Tc(R-ex)  | -2023.266667 | -1269620.066 | 0.00                      |
|             |           | S_exo        | TS-Tc(S-ex)  | -2023.265121 | -1269619.096 | 0.97                      |
| trans-trans | R_endo    | TS-Tt(R-en)  | -2023.251588 | -1269610.604 | 9.46         |                           |
|             | S_endo    | TS-Tt(S-en)  | -2023.250898 | -1269610.171 | 9.90         |                           |
|             | R_exo     | TS-Tt(R-ex)  | -2023.262974 | -1269617.749 | 2.32         |                           |
|             | S_exo     | TS-Tt(S-ex)  | -2023.26117  | -1269616.617 | 3.45         |                           |

| VQ    | diene       | Reactin-face | TS-name           | A.u.         | kcal/mol     | $\Delta\Delta G^\ddagger$ |
|-------|-------------|--------------|-------------------|--------------|--------------|---------------------------|
| s-CIS | cis-cis     | R_endo       | s-cis_TS-Cc(R-en) | -2023.248889 | -1269608.91  | 11.16                     |
|       |             | S_endo       | s-cis_TS-Cc(S-en) | -2023.24389  | -1269605.773 | 14.29                     |
|       |             | R_exo        | s-cis_TS-Cc(R-ex) | -2023.25314  | -1269611.578 | 8.49                      |
|       |             | S_exo        | s-cis_TS-Cc(S-ex) | -2023.254762 | -1269612.596 | 7.47                      |
|       | trans-cis   | R_endo       | s-cis_TS-Ct(R-en) | -2023.252217 | -1269610.999 | 9.07                      |
|       |             | S_endo       | s-cis_TS-Ct(S-en) | -2023.248121 | -1269608.428 | 11.64                     |
|       |             | R_exo        | s-cis_TS-Ct(R-ex) | -2023.249273 | -1269609.151 | 10.91                     |
|       |             | S_exo        | s-cis_TS-Ct(S-ex) | -2023.250432 | -1269609.879 | 10.19                     |
|       | cis-trans   | R_endo       | s-cis_TS-Tc(R-en) | -2023.257652 | -1269614.409 | 5.66                      |
|       |             | S_endo       | s-cis_TS-Tc(S-en) | -2023.257691 | -1269614.434 | 5.63                      |
|       |             | R_exo        | s-cis_TS-Tc(R-ex) | -2023.246881 | -1269607.65  | 12.42                     |
|       |             | S_exo        | s-cis_TS-Tc(S-ex) | -2023.249192 | -1269609.1   | 10.97                     |
|       | trans-trans | R_endo       | s-cis_TS-Tt(R-en) | -2023.250337 | -1269609.819 | 10.25                     |
|       |             | S_endo       | s-cis_TS-Tt(S-en) | -2023.249369 | -1269609.212 | 10.85                     |
|       |             | R_exo        | s-cis_TS-Tt(R-ex) | -2023.25163  | -1269610.63  | 9.44                      |
|       |             | S_exo        | s-cis_TS-Tt(S-ex) | -2023.255047 | -1269612.775 | 7.29                      |

**Table S2.** DFT calculations for transition states in the reaction of newly designed dienylcarbamates **2** with vinylquinoline **1b** catalysed by phosphoric acid (*R*)-**4**

| <b>R</b>      | <b>diene</b> | <b>Reactin-face</b> | <b>TS-name</b>             | <b>A.u.</b>  | <b>kcal/mol</b> | <b><math>\Delta\Delta G^\ddagger</math></b> |
|---------------|--------------|---------------------|----------------------------|--------------|-----------------|---------------------------------------------|
| <b>Me(2b)</b> | cis-cis      | R_endo              | TS <sub>Me</sub> -Cc(R-en) | -2062.553752 | -1294273.105    | 5.33                                        |
|               |              | S_endo              | TS <sub>Me</sub> -Cc(S-en) | -2062.553969 | -1294273.241    | 5.20                                        |
|               | cis-trans    | R_endo              | TS <sub>Me</sub> -Ct(R-en) | -2062.547342 | -1294269.083    | 9.36                                        |
|               |              | S_endo              | TS <sub>Me</sub> -Ct(S-en) | -2062.547486 | -1294269.173    | 9.27                                        |
|               | trans-cis    | R_exo               | TS <sub>Me</sub> -Tc(R-ex) | -2062.562251 | -1294278.438    | 0.00                                        |
|               |              | S_exo               | TS <sub>Me</sub> -Tc(S-ex) | -2062.559024 | -1294276.413    | 2.02                                        |
|               | trans-trans  | R_exo               | TS <sub>Me</sub> -Tt(R-ex) | -2062.557978 | -1294275.757    | 2.68                                        |
|               |              | S_exo               | TS <sub>Me</sub> -Tt(S-ex) | -2062.554628 | -1294273.655    | 4.78                                        |
| <b>F(2c)</b>  | cis-cis      | R_endo              | TS <sub>F</sub> -Cc(R-en)  | -2122.498689 | -1331889.152    | 2.67                                        |
|               |              | S_endo              | TS <sub>F</sub> -Cc(S-en)  | -2122.498794 | -1331889.218    | 2.61                                        |
|               | cis-trans    | R_endo              | TS <sub>F</sub> -Ct(R-en)  | -2122.494512 | -1331886.531    | 5.29                                        |
|               |              | S_endo              | TS <sub>F</sub> -Ct(S-en)  | -2122.494287 | -1331886.39     | 5.43                                        |
|               | trans-cis    | R_exo               | TS <sub>F</sub> -Tc(R-ex)  | -2122.502946 | -1331891.824    | 0.00                                        |
|               |              | S_exo               | TS <sub>F</sub> -Tc(S-ex)  | -2122.500877 | -1331890.525    | 1.30                                        |
|               | trans-trans  | R_exo               | TS <sub>F</sub> -Tt(R-ex)  | -2122.498404 | -1331888.973    | 2.85                                        |
|               |              | S_exo               | TS <sub>F</sub> -Tt(S-ex)  | -2122.497622 | -1331888.483    | 3.34                                        |

| <b>R</b>       | <b>diene</b> | <b>Reactin-face</b> | <b>TS-name</b>              | <b>A.u.</b>  | <b>kcal/mol</b> | <b><math>\Delta\Delta G^\ddagger</math></b> |
|----------------|--------------|---------------------|-----------------------------|--------------|-----------------|---------------------------------------------|
| <b>OMe(2d)</b> | cis-cis      | R_endo              | TS <sub>OMe</sub> -Cc(R-en) | -2137.751418 | -1341460.392    | 5.74                                        |
|                |              | S_endo              | TS <sub>OMe</sub> -Cc(S-en) | -2137.751958 | -1341460.731    | 5.40                                        |
|                | cis-trans    | R_endo              | TS <sub>OMe</sub> -Ct(R-en) | -2137.74695  | -1341457.589    | 8.54                                        |
|                |              | S_endo              | TS <sub>OMe</sub> -Ct(S-en) | -2137.746753 | -1341457.465    | 8.67                                        |
|                | trans-cis    | R_exo               | TS <sub>OMe</sub> -Tc(R-ex) | -2137.760565 | -1341466.132    | 0.00                                        |
|                |              | S_exo               | TS <sub>OMe</sub> -Tc(S-ex) | -2137.758529 | -1341464.855    | 1.28                                        |
|                | trans-trans  | R_exo               | TS <sub>OMe</sub> -Tt(R-ex) | -2137.756269 | -1341463.436    | 2.70                                        |
|                |              | S_exo               | TS <sub>OMe</sub> -Tt(S-ex) | -2137.753944 | -1341461.977    | 4.15                                        |
| <b>I(2e)</b>   | cis-cis      | R_endo              | TS <sub>I</sub> -Cc(R-en)   | -2034.012039 | -1276362.895    | 5.70                                        |
|                |              | S_endo              | TS <sub>I</sub> -Cc(S-en)   | -2034.011631 | -1276362.639    | 5.96                                        |
|                | cis-trans    | R_endo              | TS <sub>I</sub> -Ct(R-en)   | -2034.008199 | -1276360.485    | 8.11                                        |
|                |              | S_endo              | TS <sub>I</sub> -Ct(S-en)   | -2034.008058 | -1276360.396    | 8.20                                        |
|                | trans-cis    | R_exo               | TS <sub>I</sub> -Tc(R-ex)   | -2034.021128 | -1276368.598    | 0.00                                        |
|                |              | S_exo               | TS <sub>I</sub> -Tc(S-ex)   | -2034.019568 | -1276367.619    | 0.98                                        |
|                | trans-trans  | R_exo               | TS <sub>I</sub> -Tt(R-ex)   | -2034.016124 | -1276365.458    | 3.14                                        |
|                |              | S_exo               | TS <sub>I</sub> -Tt(S-ex)   | -2034.012585 | -1276363.237    | 5.36                                        |

| <b>R</b>       | <b>diene</b> | <b>Reactin-face</b> | <b>TS-name</b>              | <b>A.u.</b>  | <b>kcal/mol</b> | <b><math>\Delta\Delta G^\ddagger</math></b> |
|----------------|--------------|---------------------|-----------------------------|--------------|-----------------|---------------------------------------------|
| <b>TMS(2f)</b> | cis-cis      | R_endo              | TS <sub>TMS</sub> -Cc(R-en) | -2431.854907 | -1526013.273    | 6.35                                        |
|                |              | S_endo              | TS <sub>TMS</sub> -Cc(S-en) | -2431.855695 | -1526013.767    | 5.86                                        |
|                | cis-trans    | R_endo              | TS <sub>TMS</sub> -Ct(R-en) | -2431.848683 | -1526009.367    | 10.26                                       |
|                |              | S_endo              | TS <sub>TMS</sub> -Ct(S-en) | -2431.84898  | -1526009.553    | 10.07                                       |
|                | trans-cis    | R_exo               | TS <sub>TMS</sub> -Tc(R-ex) | -2431.865032 | -1526019.626    | 0.00                                        |
|                |              | S_exo               | TS <sub>TMS</sub> -Tc(S-ex) | -2431.863214 | -1526018.485    | 1.14                                        |
|                | trans-trans  | R_exo               | TS <sub>TMS</sub> -Tt(R-ex) | -2431.861293 | -1526017.28     | 2.35                                        |
|                |              | S_exo               | TS <sub>TMS</sub> -Tt(S-ex) | -2431.858825 | -1526015.731    | 3.89                                        |
| <b>SPh(2g)</b> | cis-cis      | R_endo              | TS <sub>SPh</sub> -Cc(R-en) | -2652.435587 | -1664429.855    | 6.43                                        |
|                |              | S_endo              | TS <sub>SPh</sub> -Cc(S-en) | -2652.435186 | -1664429.604    | 6.69                                        |
|                | cis-trans    | R_endo              | TS <sub>SPh</sub> -Ct(R-en) | -2652.430757 | -1664426.824    | 9.47                                        |
|                |              | S_endo              | TS <sub>SPh</sub> -Ct(S-en) | -2652.430539 | -1664426.688    | 9.60                                        |
|                | trans-cis    | R_exo               | TS <sub>SPh</sub> -Tc(R-ex) | -2652.445841 | -1664436.29     | 0.00                                        |
|                |              | S_exo               | TS <sub>SPh</sub> -Tc(S-ex) | -2652.445256 | -1664435.923    | 0.37                                        |
|                | trans-trans  | R_exo               | TS <sub>SPh</sub> -Tt(R-ex) | -2652.441962 | -1664433.856    | 2.43                                        |
|                |              | S_exo               | TS <sub>SPh</sub> -Tt(S-ex) | -2652.437919 | -1664431.319    | 4.97                                        |

### 4-3. TS images

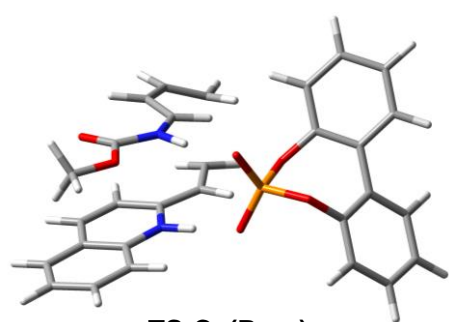

**TS-Cc(R-en)**  
(0.4)

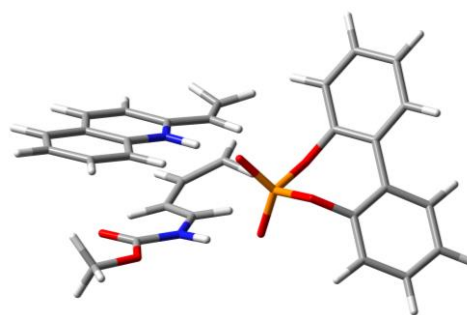

**TS-Cc(S-en)**  
(0.5)

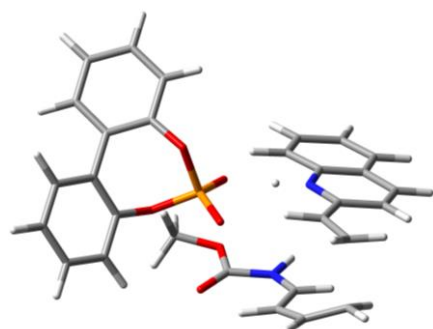

**TS-Cc(R-ex)**  
(13.7)

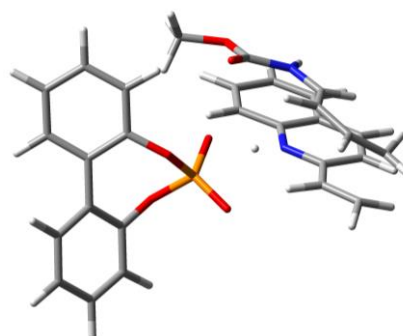

**TS-Cc(S-ex)**  
(15.3)

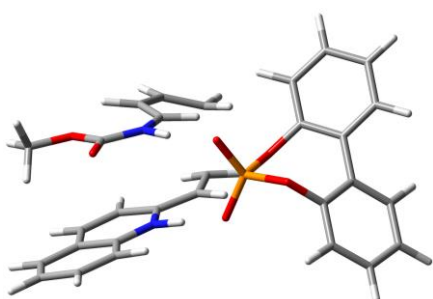

**TS-Ct(R-en)**  
(3.8)

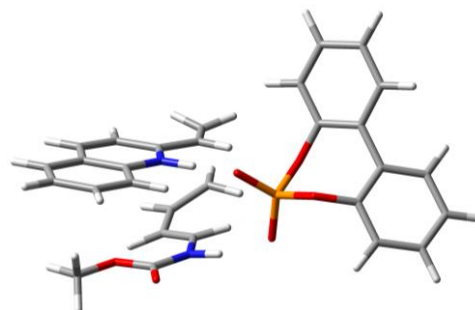

**TS-Ct(S-en)**  
(4.1)

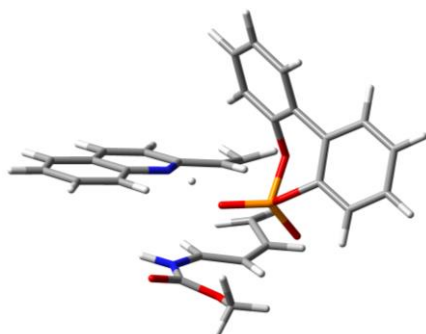

**TS-Ct(R-ex)**  
(16.5)

**TS-Ct(S-ex)**  
(N.D.)

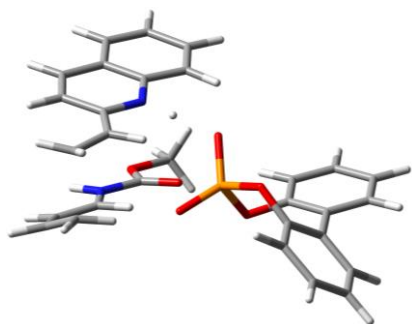

**TS-Tc(R-en)**  
(11.2)

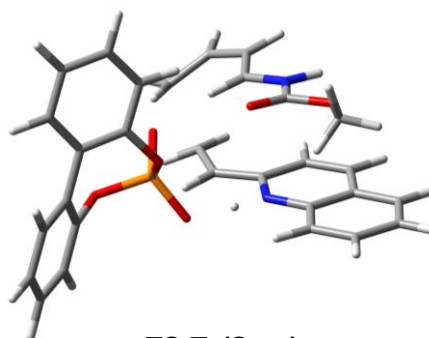

**TS-Tc(S-en)**  
(11.7)

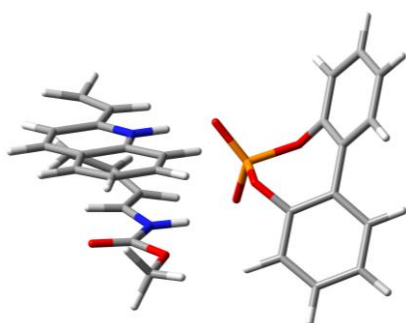

**TS-Tc(R-ex)**  
(0.0 kcal·mol<sup>-1</sup>)

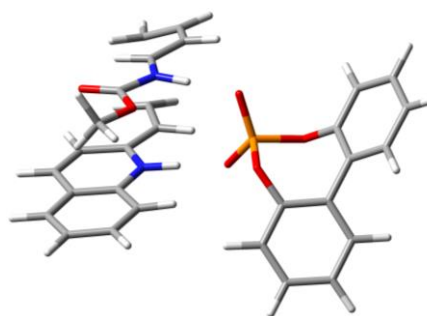

**TS-Tc(S-ex)**  
(1.1)

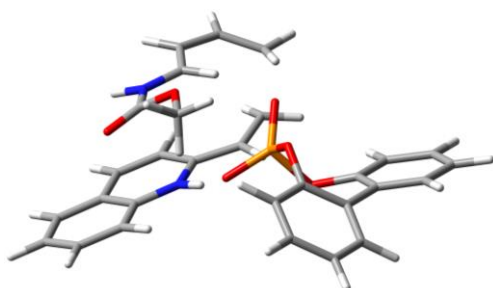

**TS-Tt(R-en)**  
(9.5)

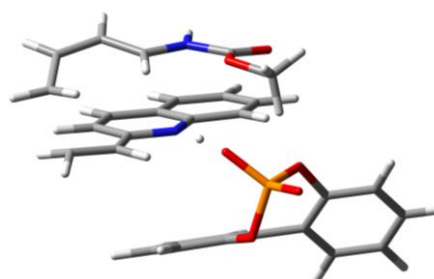

**TS-Tt(S-en)**  
(9.9)

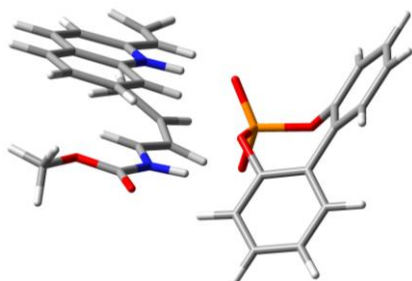

**TS-Tt(R-ex)**  
(2.3)

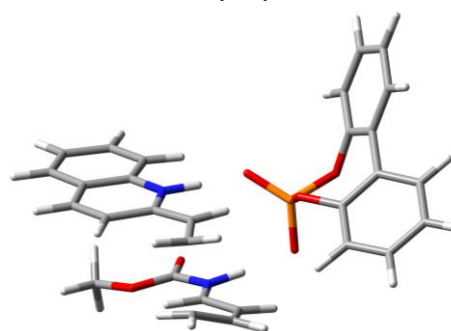

**TS-Tt(S-ex)**  
(3.5)

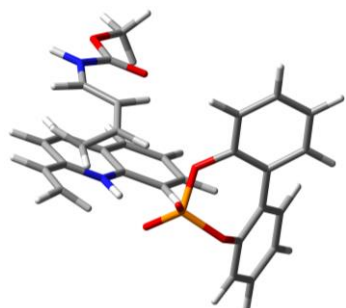

***s-cis*\_TS-Cc(R-en)  
(11.2)**

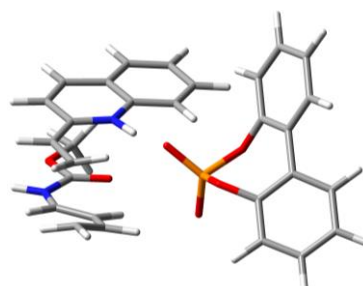

***s-cis*\_TS-Cc(S-en)  
(14.3)**

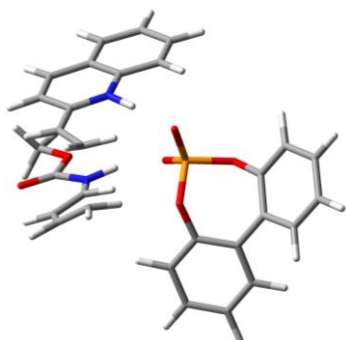

***s-cis*\_TS-Cc(R-ex)  
(8.5)**

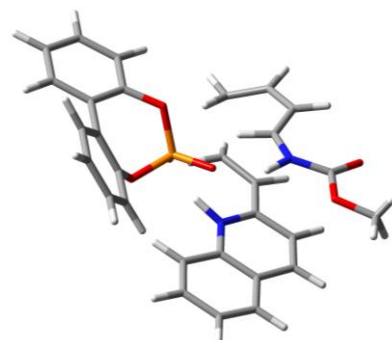

***s-cis*\_TS-Cc(S-ex)  
(7.5)**

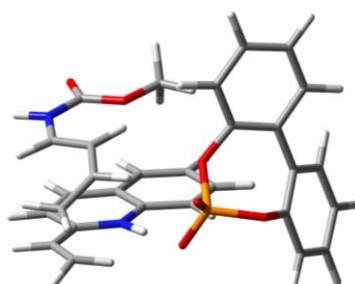

***s-cis*\_TS-Ct(R-en)  
(9.1)**

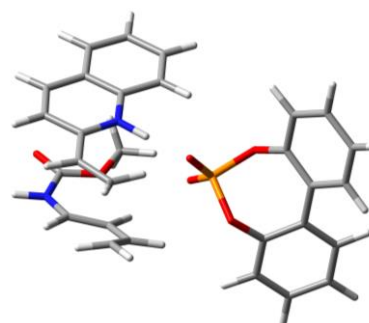

***s-cis*\_TS-Ct(S-en)  
(11.6)**

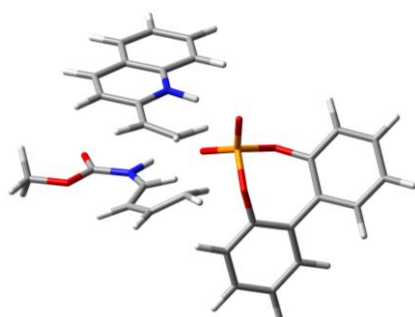

***s-cis*\_TS-Ct(R-ex)  
(10.9)**

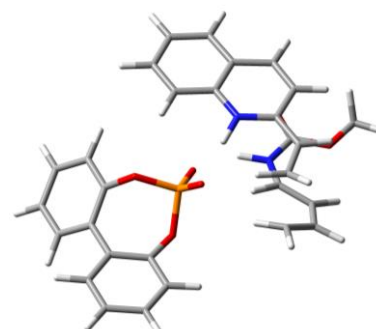

***s-cis*\_TS-Ct(S-ex)  
(10.2)**



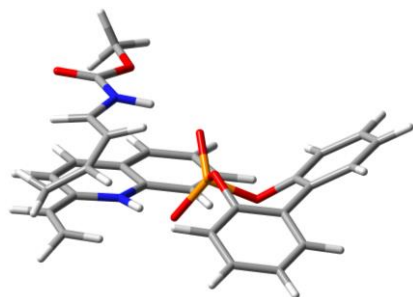

***s-cis*\_TS-Tc(R-en)  
(5.7)**

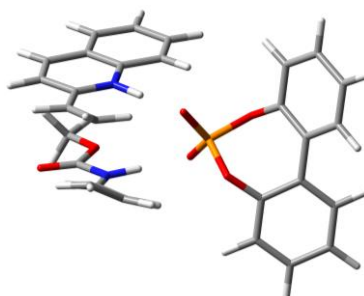

***s-cis*\_TS-Tc(S-en)  
(5.6)**

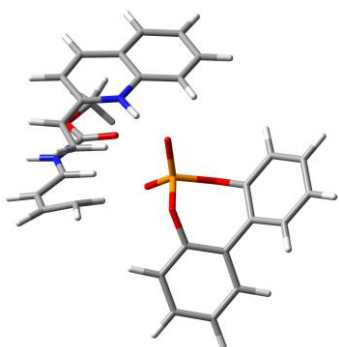

***s-cis*\_TS-Tc(R-ex)  
(12.4)**

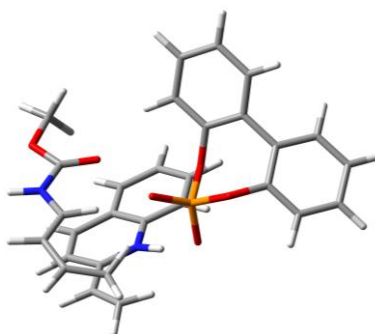

***s-cis*\_TS-Tc(S-ex)  
(11.0)**

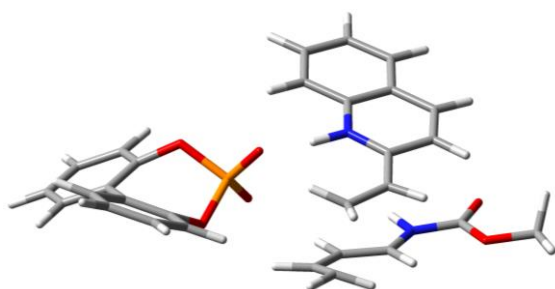

***s-cis*\_TS-Tt(R-en)  
(10.3)**

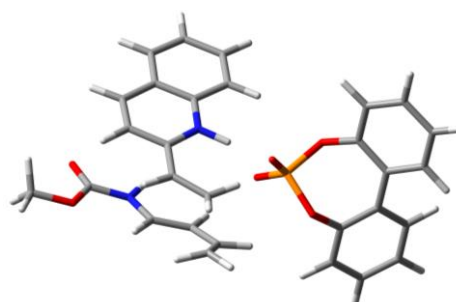

***s-cis*\_TS-Tt(S-en)  
(10.9)**

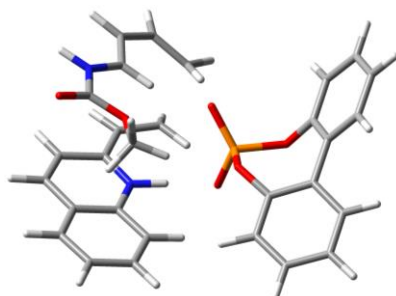

***s-cis*\_TS-Tt(R-ex)  
(9.4)**

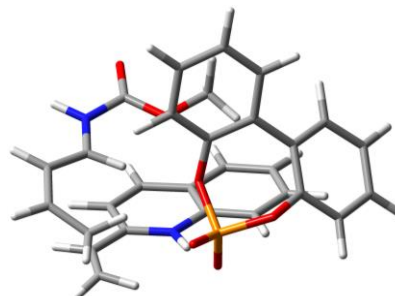

***s-cis*\_TS-Tt(S-ex)  
(7.3)**

For **2b** (R = Me): Dihedral angles ( $C^1-N^1-C^2-C^3$ ) for dienylcarbamate **2b** were shown in square brackets.

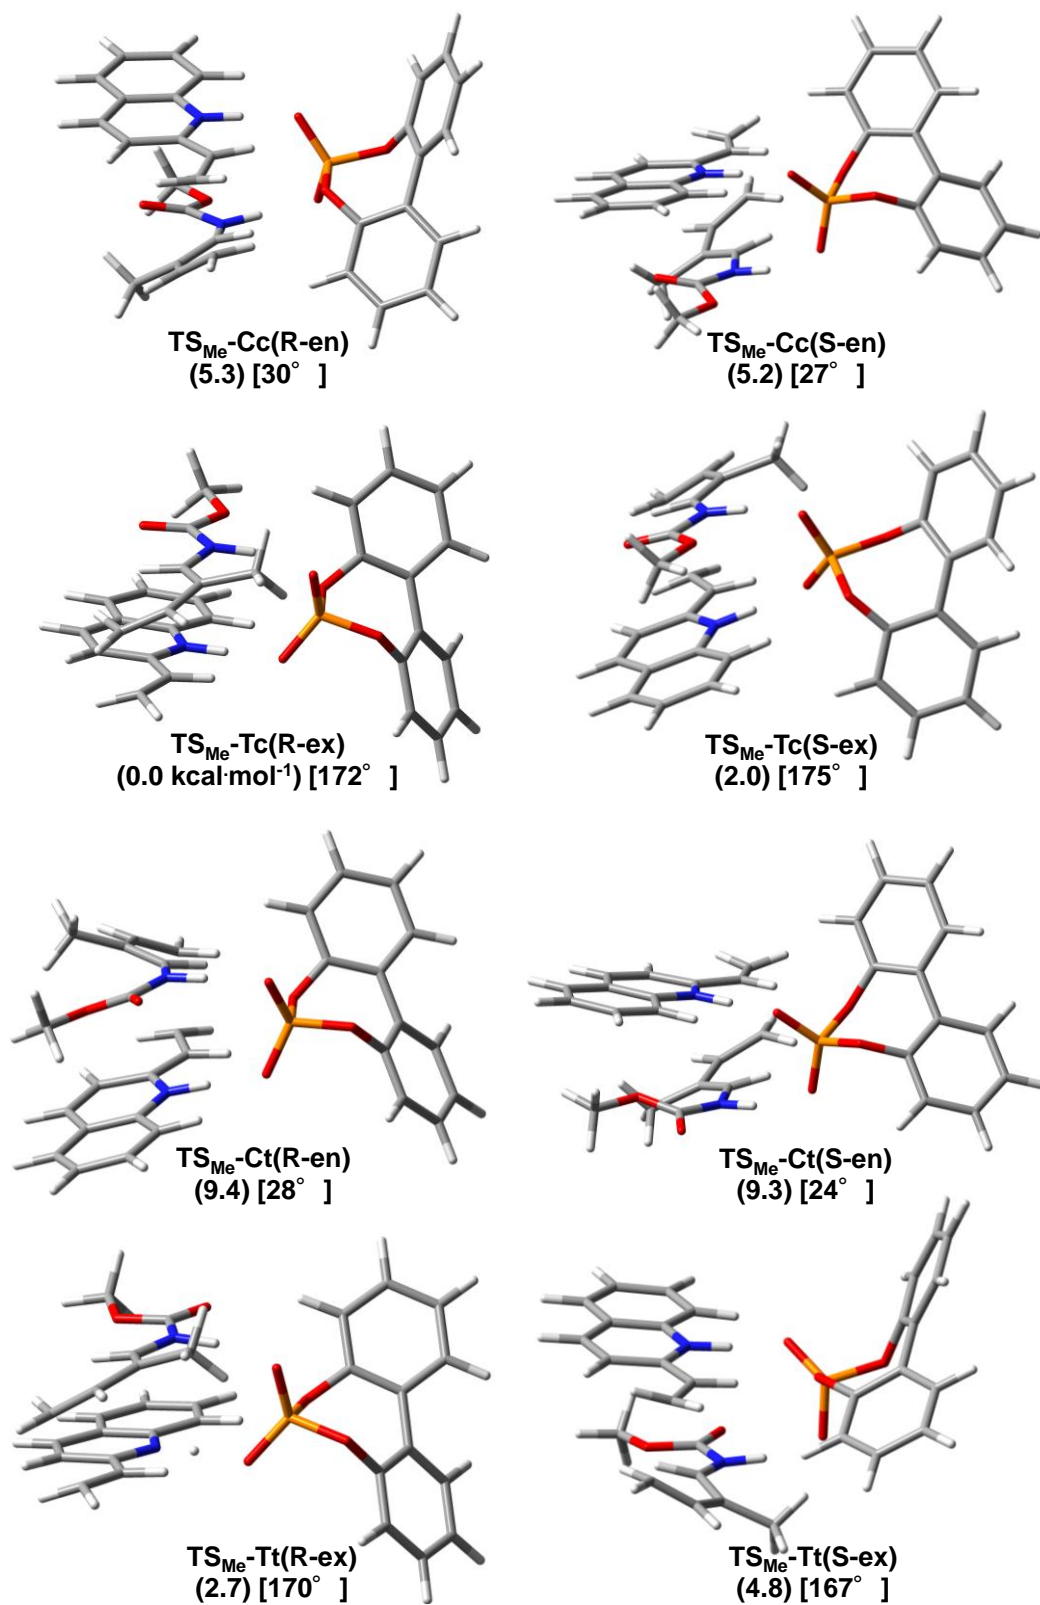

For **2c** (R = F) : Dihedral angles ( $C^1-N^1-C^2-C^3$ ) for dienylcarbamate **2c** were shown in square brackets.

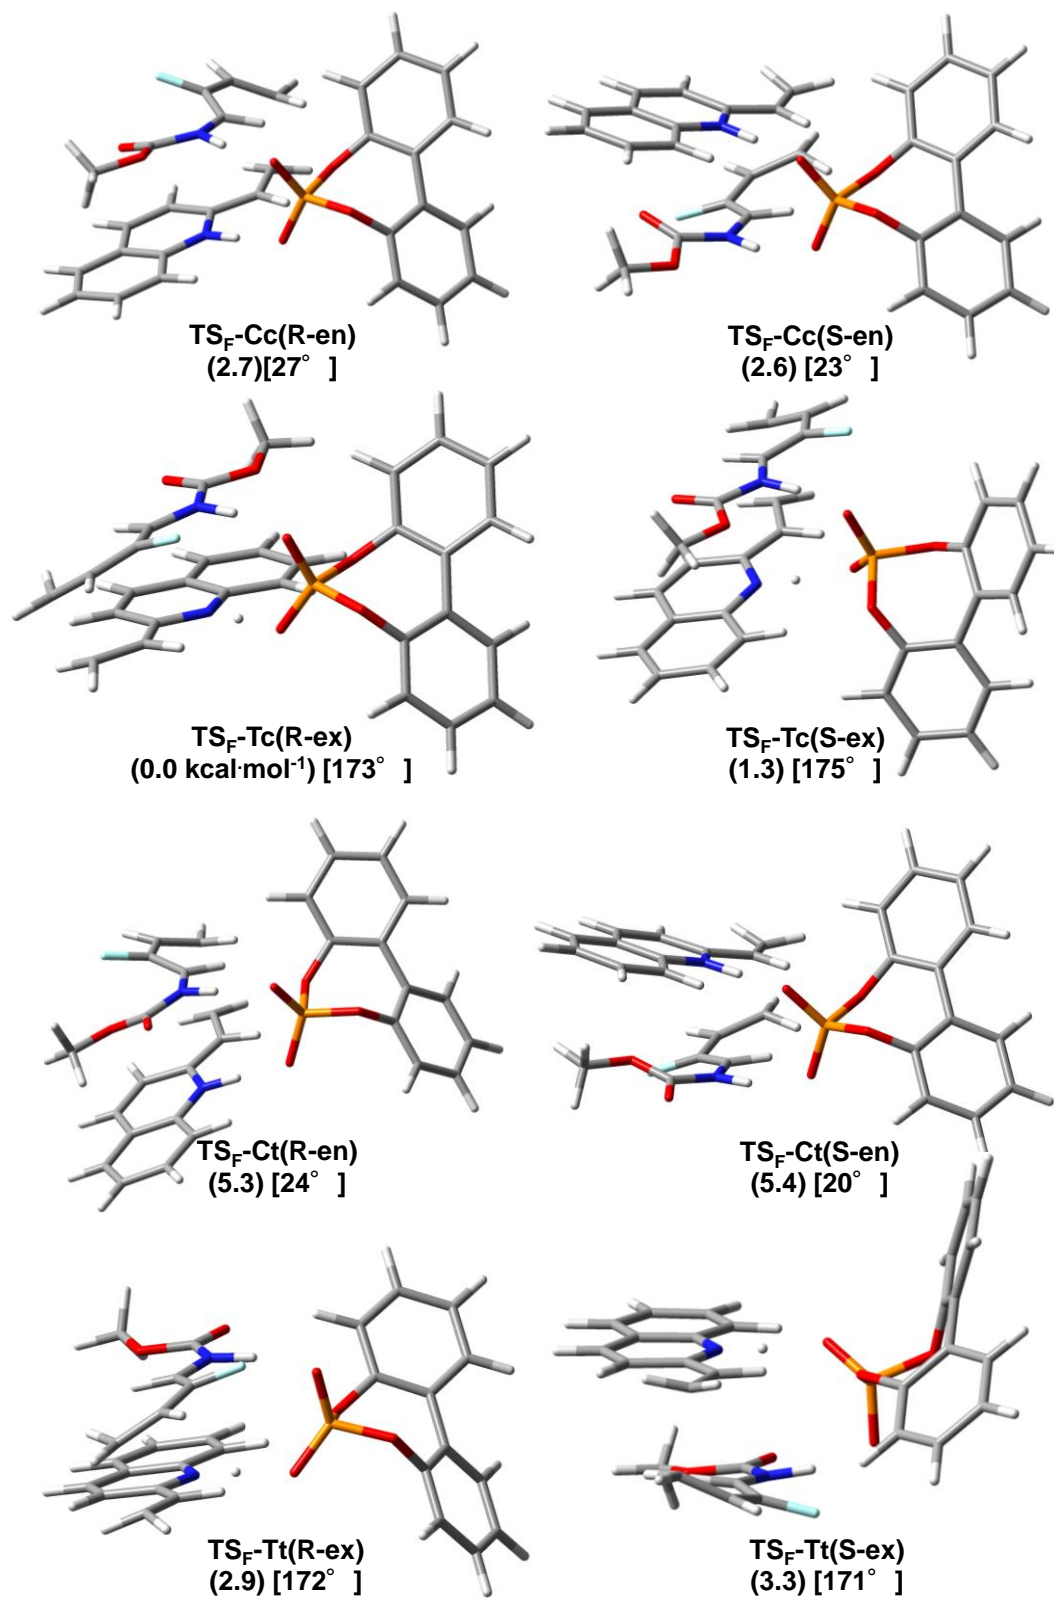

For **2d** (R = OMe) : Dihedral angles ( $C^1-N^1-C^2-C^3$ ) for dienylicarbamate **2d** were shown in square brackets.

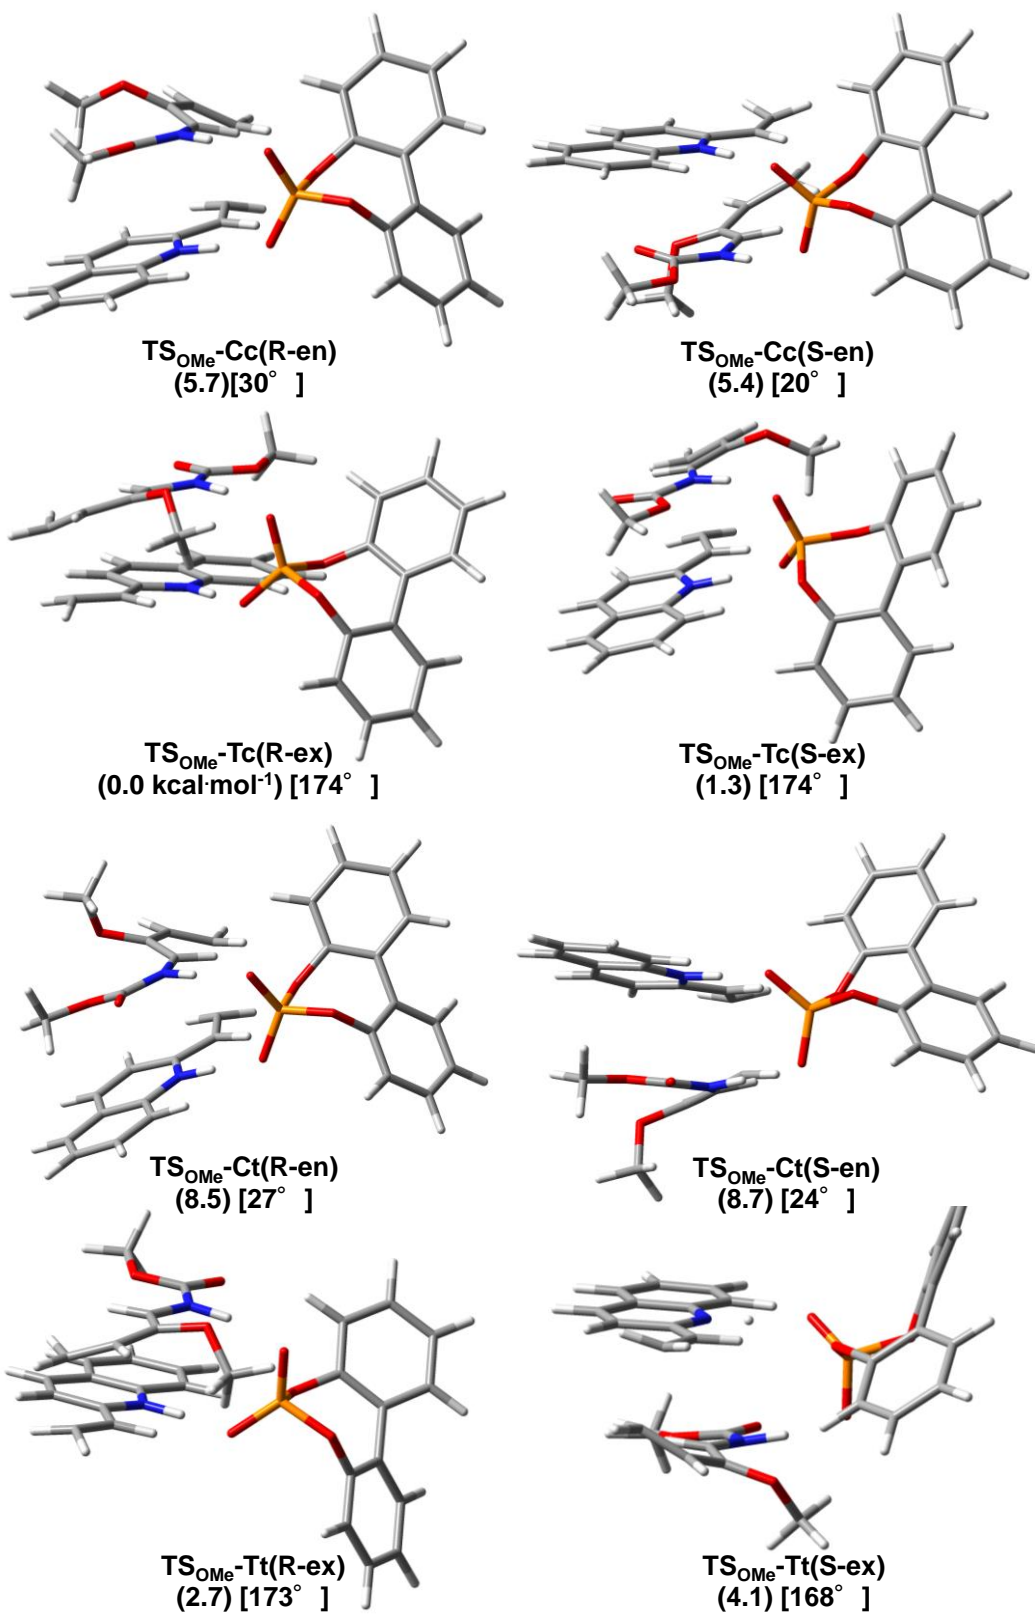

For **2e** (R = I) : Dihedral angles (C<sup>1</sup>-N<sup>1</sup>-C<sup>2</sup>-C<sup>3</sup>) for dienylicarbamate **2e** were shown in square brackets.

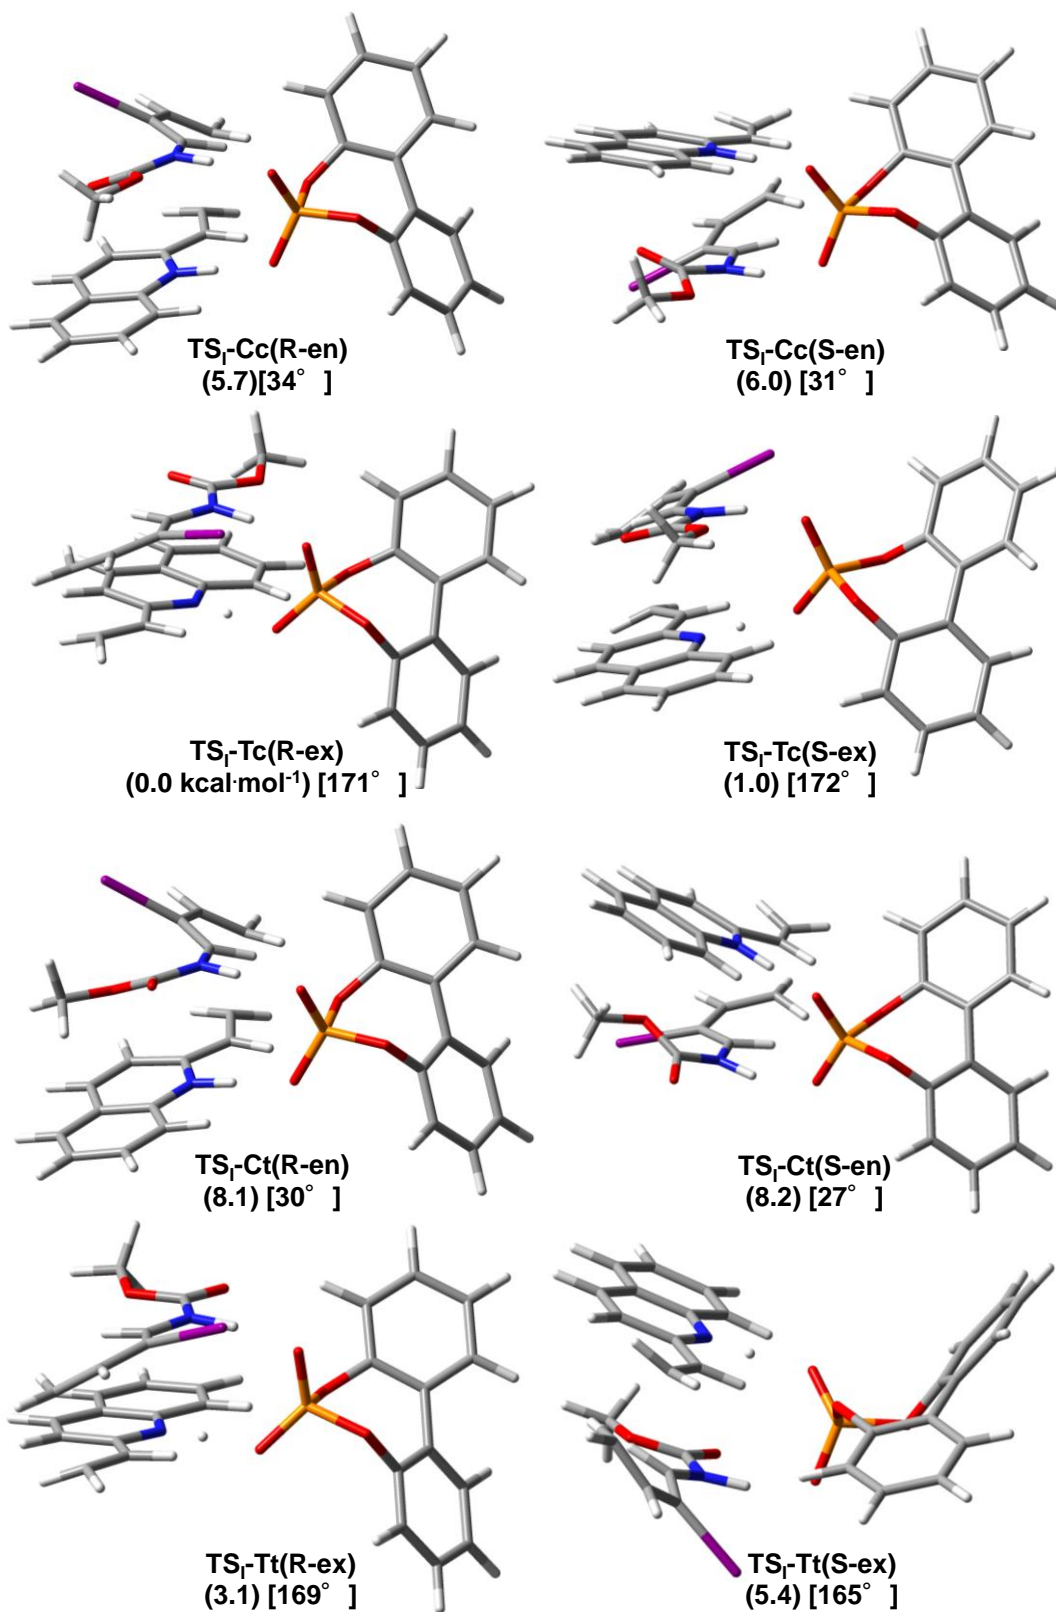

For **2f** (R = TMS) : Dihedral angles ( $C^1-N^1-C^2-C^3$ ) for dienylicarbamate **2f** were shown in square brackets.

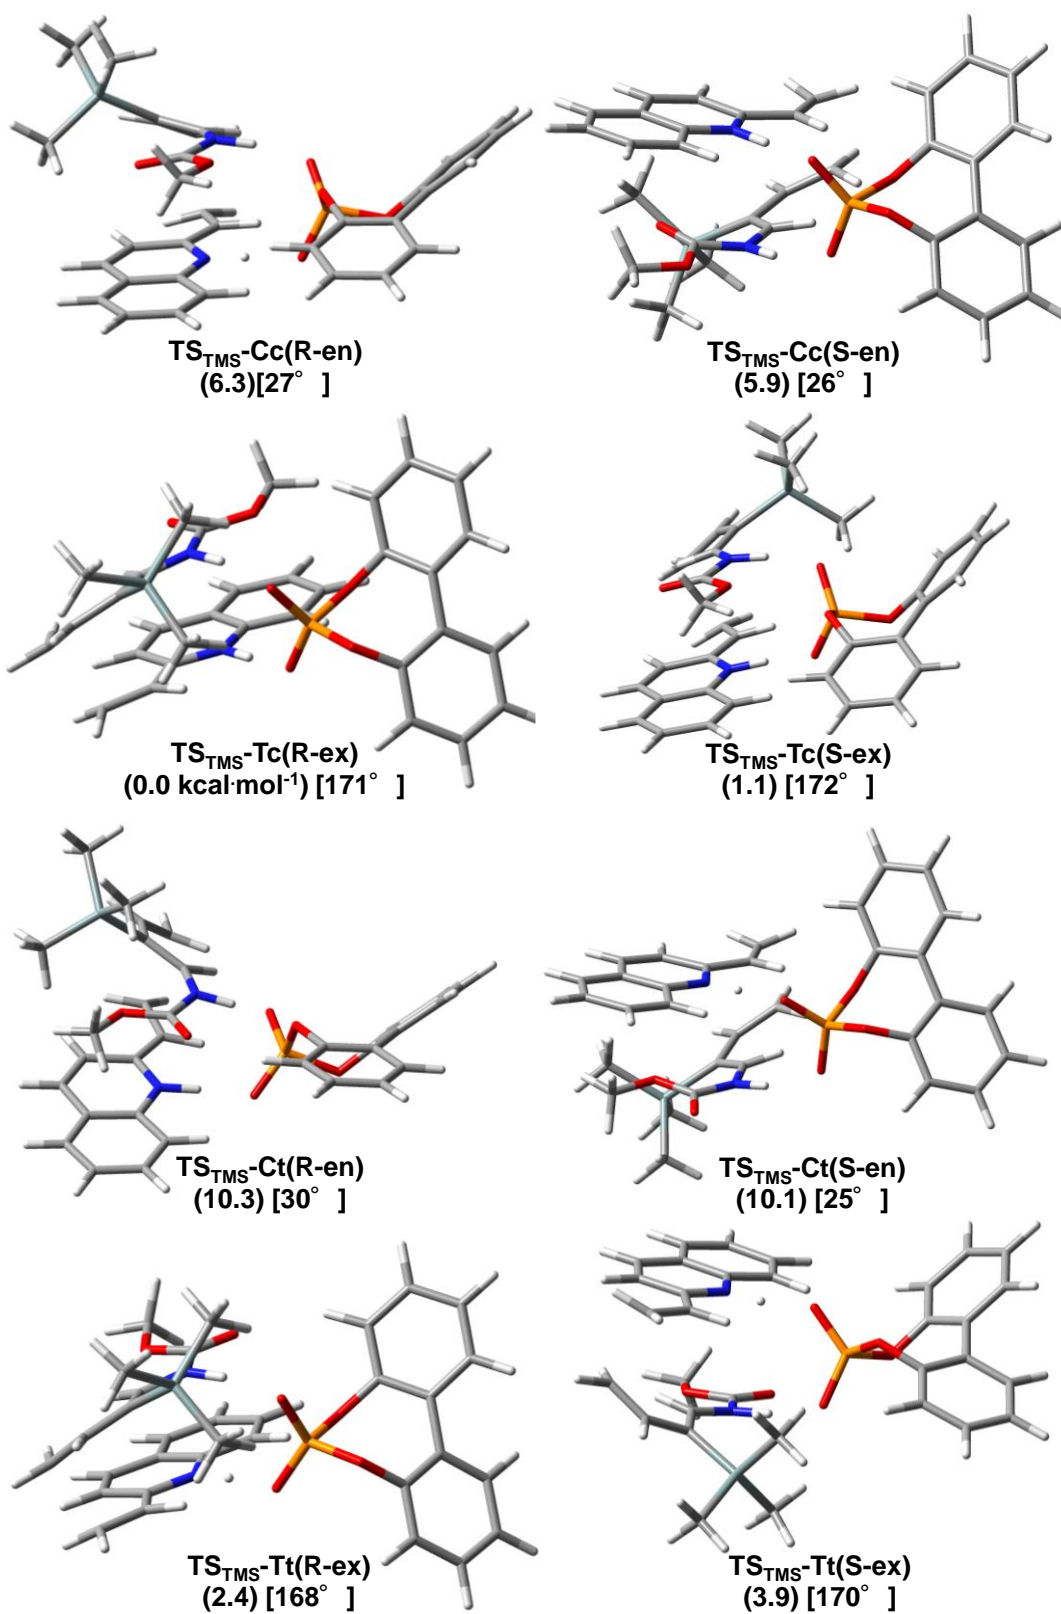

For **2g** (R = SPh) : Dihedral angles ( $C^1-N^1-C^2-C^3$ ) for dienylcarbamate **2g** were shown in square brackets.

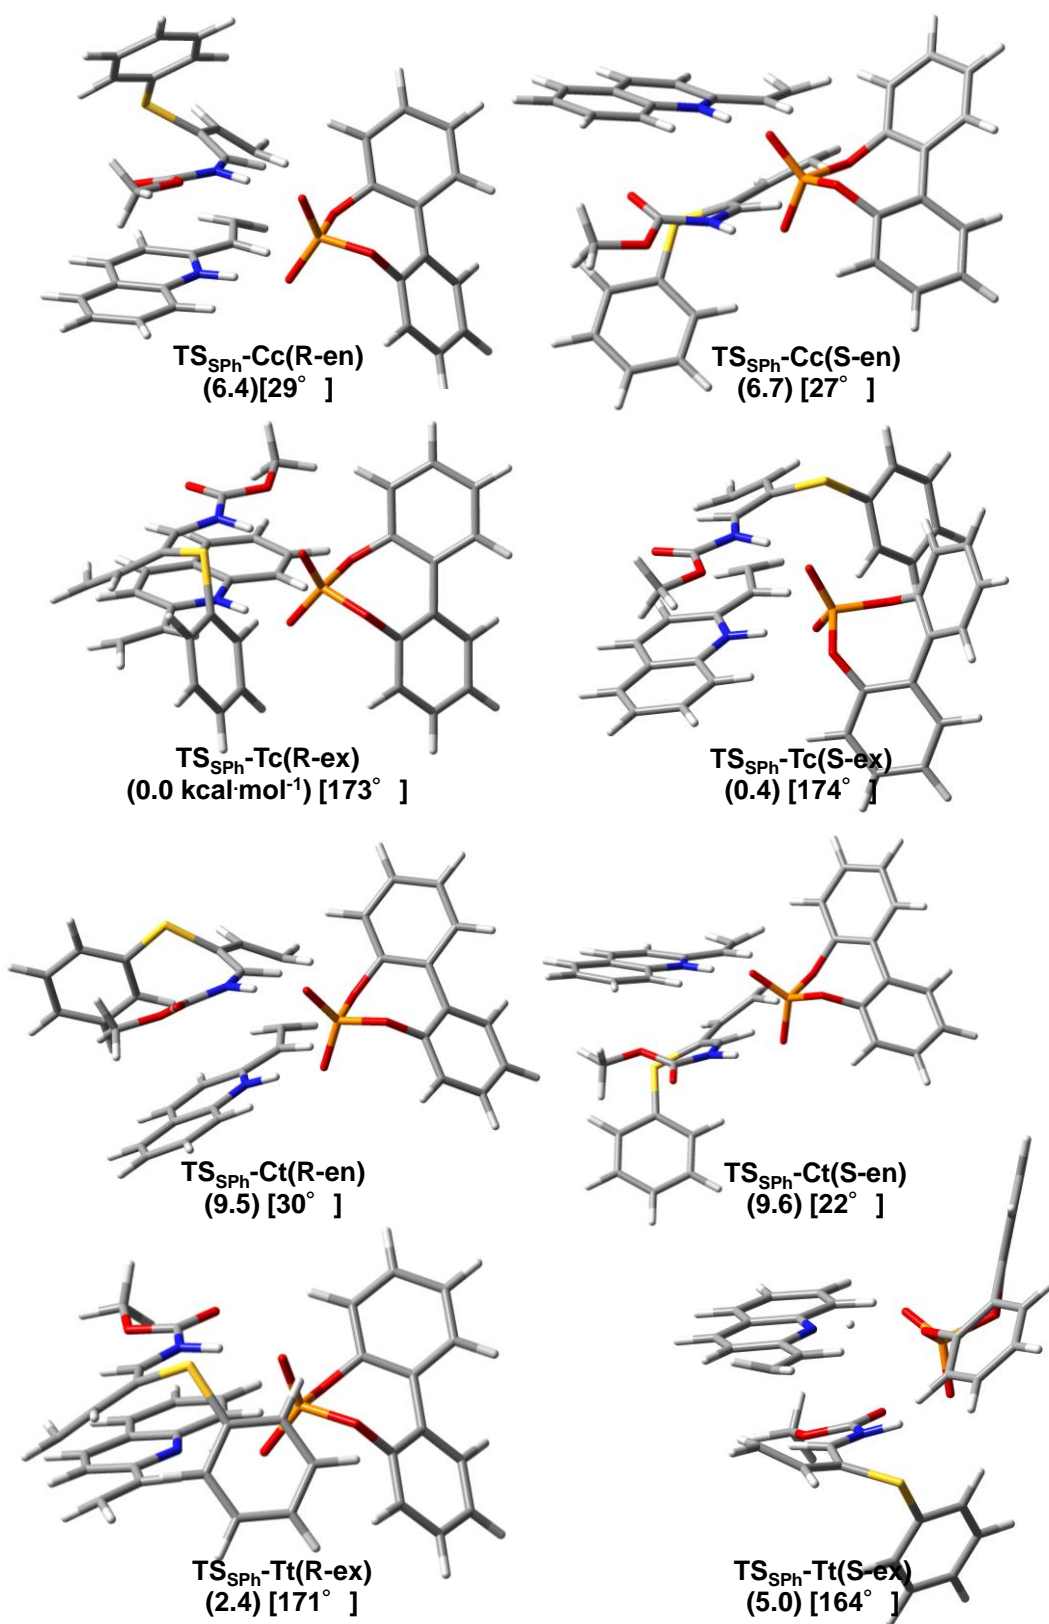

### 4-3. Coordination

#### TS-Cc(R-en)

B3LYP-D3/6-31g(d) in gas phase

SCF Done: E(RB3LYP) = -2023.713572 hartree

Sum of electronic and thermal Free Energies = -2023.265971 hartree

The number of imaginary frequency = 1

Imaginary frequency = -334.97

| Center Number | Atomic Number | Atomic Type | Coordinates (Angstroms) |           |           |
|---------------|---------------|-------------|-------------------------|-----------|-----------|
|               |               |             | X                       | Y         | Z         |
| 1             | 6             | 0           | -0.047576               | 3.839671  | -1.427458 |
| 2             | 1             | 0           | 0.756333                | 3.285790  | -0.952734 |
| 3             | 1             | 0           | 0.288027                | 4.627607  | -2.097123 |
| 4             | 6             | 0           | -1.277543               | 3.990156  | -0.793757 |
| 5             | 1             | 0           | -1.939015               | 4.767880  | -1.174014 |
| 6             | 6             | 0           | -1.148672               | 2.046761  | 0.692533  |
| 7             | 1             | 0           | -0.083622               | 1.934528  | 0.524264  |
| 8             | 1             | 0           | -0.908048               | 0.391396  | 1.851001  |
| 9             | 7             | 0           | -1.627825               | 1.055158  | 1.490099  |
| 10            | 6             | 0           | -2.960423               | 0.789949  | 1.760126  |
| 11            | 8             | 0           | -3.033087               | -0.312723 | 2.530183  |
| 12            | 8             | 0           | -3.919611               | 1.422408  | 1.359729  |
| 13            | 1             | 0           | -1.031100               | -1.023672 | -0.788809 |
| 14            | 6             | 0           | -5.444958               | -2.666662 | -0.152850 |
| 15            | 6             | 0           | -5.519835               | -1.488976 | -0.876922 |
| 16            | 6             | 0           | -4.347639               | -0.780649 | -1.213092 |
| 17            | 6             | 0           | -3.095756               | -1.301221 | -0.796809 |
| 18            | 6             | 0           | -3.021346               | -2.490906 | -0.045814 |
| 19            | 6             | 0           | -4.191107               | -3.162338 | 0.263394  |
| 20            | 1             | 0           | -5.283663               | 0.864496  | -2.280035 |
| 21            | 1             | 0           | -6.351075               | -3.208822 | 0.100449  |
| 22            | 1             | 0           | -6.481152               | -1.093623 | -1.194526 |
| 23            | 6             | 0           | -4.335368               | 0.441718  | -1.958779 |
| 24            | 1             | 0           | -2.047903               | -2.849418 | 0.275186  |
| 25            | 1             | 0           | -4.141377               | -4.081939 | 0.839328  |
| 26            | 6             | 0           | -1.907047               | 0.533354  | -1.832582 |
| 27            | 6             | 0           | -3.167173               | 1.074574  | -2.259149 |
| 28            | 1             | 0           | -3.170663               | 2.002996  | -2.816116 |
| 29            | 7             | 0           | -1.947636               | -0.624212 | -1.123680 |
| 30            | 6             | 0           | -0.630874               | 1.084982  | -2.118559 |
| 31            | 1             | 0           | 0.225558                | 0.530336  | -1.749833 |
| 32            | 6             | 0           | -0.398538               | 2.270952  | -2.809649 |
| 33            | 1             | 0           | -1.193394               | 2.751126  | -3.371662 |
| 34            | 1             | 0           | 0.590706                | 2.415706  | -3.233583 |
| 35            | 6             | 0           | 4.398447                | -1.000404 | -0.241767 |
| 36            | 6             | 0           | 5.393843                | -1.360994 | -1.164385 |
| 37            | 6             | 0           | 5.492407                | -2.661965 | -1.653008 |
| 38            | 6             | 0           | 4.585075                | -3.636028 | -1.228355 |
| 39            | 6             | 0           | 3.587299                | -3.304075 | -0.313795 |
| 40            | 6             | 0           | 3.503342                | -2.002636 | 0.175257  |
| 41            | 6             | 0           | 4.306710                | 0.378390  | 0.289657  |
| 42            | 6             | 0           | 5.458309                | 1.085741  | 0.669726  |
| 43            | 6             | 0           | 5.384435                | 2.385929  | 1.165579  |

|    |    |   |           |           |           |
|----|----|---|-----------|-----------|-----------|
| 44 | 6  | 0 | 4.141085  | 3.006126  | 1.304041  |
| 45 | 6  | 0 | 2.982151  | 2.324677  | 0.935748  |
| 46 | 6  | 0 | 3.065228  | 1.029983  | 0.424171  |
| 47 | 1  | 0 | 6.083663  | -0.596949 | -1.512444 |
| 48 | 1  | 0 | 6.268380  | -2.912410 | -2.370970 |
| 49 | 1  | 0 | 4.651168  | -4.651062 | -1.610273 |
| 50 | 1  | 0 | 2.867505  | -4.034426 | 0.039744  |
| 51 | 1  | 0 | 6.421977  | 0.590207  | 0.590874  |
| 52 | 1  | 0 | 6.292167  | 2.906186  | 1.457786  |
| 53 | 1  | 0 | 4.070291  | 4.013941  | 1.703716  |
| 54 | 1  | 0 | 2.004858  | 2.782928  | 1.046320  |
| 55 | 8  | 0 | 2.564382  | -1.723704 | 1.155205  |
| 56 | 8  | 0 | 1.911817  | 0.427173  | -0.042431 |
| 57 | 15 | 0 | 1.220011  | -0.865348 | 0.770863  |
| 58 | 8  | 0 | 0.400320  | -1.580185 | -0.276943 |
| 59 | 8  | 0 | 0.599275  | -0.381326 | 2.047837  |
| 60 | 6  | 0 | -4.364900 | -0.713053 | 2.887884  |
| 61 | 1  | 0 | -4.956710 | -0.919273 | 1.993630  |
| 62 | 1  | 0 | -4.241108 | -1.618966 | 3.481403  |
| 63 | 1  | 0 | -4.853164 | 0.069371  | 3.476051  |
| 64 | 6  | 0 | -1.841650 | 3.114746  | 0.157199  |
| 65 | 1  | 0 | -2.882873 | 3.239719  | 0.424346  |

#### TS-Cc(S-en)

B3LYP-D3/6-31g(d) in gas phase

SCF Done: E(RB3LYP) = -2023.712958 hartree

Sum of electronic and thermal Free Energies = -2023.265825 hartree

The number of imaginary frequency = 1

Imaginary frequency = -330.23

| Center Number | Atomic Number | Atomic Type | Coordinates (Angstroms) |           |           |
|---------------|---------------|-------------|-------------------------|-----------|-----------|
|               |               |             | X                       | Y         | Z         |
| 1             | 6             | 0           | 0.918855                | 3.438811  | 2.775729  |
| 2             | 1             | 0           | -0.004800               | 2.869039  | 2.751766  |
| 3             | 1             | 0           | 0.797801                | 4.479200  | 3.066167  |
| 4             | 6             | 0           | 2.128039                | 2.806721  | 3.040493  |
| 5             | 1             | 0           | 2.967650                | 3.437425  | 3.330906  |
| 6             | 6             | 0           | 1.490389                | 0.557740  | 2.315518  |
| 7             | 1             | 0           | 0.432766                | 0.798860  | 2.318320  |
| 8             | 1             | 0           | 0.815235                | -1.203972 | 1.597916  |
| 9             | 7             | 0           | 1.692068                | -0.707993 | 1.861820  |
| 10            | 6             | 0           | 2.912407                | -1.301893 | 1.592185  |
| 11            | 8             | 0           | 2.695735                | -2.534497 | 1.091238  |
| 12            | 8             | 0           | 4.010592                | -0.804013 | 1.757264  |
| 13            | 1             | 0           | 1.016001                | 0.065224  | -1.064178 |
| 14            | 6             | 0           | 5.121149                | -1.763050 | -2.556896 |
| 15            | 6             | 0           | 5.385953                | -0.536157 | -1.974300 |
| 16            | 6             | 0           | 4.336851                | 0.243345  | -1.443085 |
| 17            | 6             | 0           | 3.013168                | -0.260516 | -1.514880 |
| 18            | 6             | 0           | 2.744113                | -1.514424 | -2.099476 |
| 19            | 6             | 0           | 3.796455                | -2.247278 | -2.618482 |
| 20            | 1             | 0           | 5.524727                | 1.931732  | -0.767895 |



|    |    |   |           |           |           |
|----|----|---|-----------|-----------|-----------|
| 21 | 1  | 0 | 5.932312  | -2.356922 | -2.967405 |
| 22 | 1  | 0 | 6.402745  | -0.156391 | -1.918504 |
| 23 | 6  | 0 | 4.518608  | 1.526572  | -0.837875 |
| 24 | 1  | 0 | 1.719141  | -1.871915 | -2.124094 |
| 25 | 1  | 0 | 3.599026  | -3.213005 | -3.074909 |
| 26 | 6  | 0 | 2.129206  | 1.702896  | -0.418359 |
| 27 | 6  | 0 | 3.460317  | 2.234028  | -0.350022 |
| 28 | 1  | 0 | 3.610264  | 3.199460  | 0.116470  |
| 29 | 7  | 0 | 1.983703  | 0.485649  | -0.997079 |
| 30 | 6  | 0 | 0.956644  | 2.357116  | 0.050727  |
| 31 | 1  | 0 | 0.025883  | 1.812036  | -0.062469 |
| 32 | 6  | 0 | 0.914911  | 3.617551  | 0.636702  |
| 33 | 1  | 0 | 1.764224  | 4.289318  | 0.567738  |
| 34 | 1  | 0 | -0.046605 | 4.120440  | 0.676831  |
| 35 | 6  | 0 | 3.886455  | -3.279350 | 0.790541  |
| 36 | 1  | 0 | 4.456987  | -3.468650 | 1.704583  |
| 37 | 1  | 0 | 3.535888  | -4.215863 | 0.356429  |
| 38 | 1  | 0 | 4.510945  | -2.736818 | 0.077979  |
| 39 | 6  | 0 | -4.293241 | 0.602236  | -0.803843 |
| 40 | 6  | 0 | -5.215161 | 1.225977  | -1.659582 |
| 41 | 6  | 0 | -4.874957 | 2.359127  | -2.395441 |
| 42 | 6  | 0 | -3.588021 | 2.891621  | -2.293673 |
| 43 | 6  | 0 | -2.652845 | 2.290938  | -1.452566 |
| 44 | 6  | 0 | -3.004141 | 1.162475  | -0.712499 |
| 45 | 6  | 0 | -4.672906 | -0.592714 | -0.016168 |
| 46 | 6  | 0 | -5.917056 | -0.673125 | 0.630036  |
| 47 | 6  | 0 | -6.283581 | -1.802286 | 1.359242  |
| 48 | 6  | 0 | -5.401919 | -2.881287 | 1.462361  |
| 49 | 6  | 0 | -4.160640 | -2.826618 | 0.831047  |
| 50 | 6  | 0 | -3.808020 | -1.696392 | 0.097396  |
| 51 | 1  | 0 | -6.207434 | 0.794334  | -1.757255 |
| 52 | 1  | 0 | -5.607270 | 2.816398  | -3.054845 |
| 53 | 1  | 0 | -3.309425 | 3.769415  | -2.870460 |
| 54 | 1  | 0 | -1.646338 | 2.684946  | -1.358177 |
| 55 | 1  | 0 | -6.591453 | 0.176769  | 0.570393  |
| 56 | 1  | 0 | -7.249702 | -1.835373 | 1.855087  |
| 57 | 1  | 0 | -5.677382 | -3.762081 | 2.035815  |
| 58 | 1  | 0 | -3.451921 | -3.645799 | 0.887951  |
| 59 | 8  | 0 | -2.089235 | 0.655718  | 0.193600  |
| 60 | 8  | 0 | -2.612322 | -1.708291 | -0.602100 |
| 61 | 15 | 0 | -1.344872 | -0.812895 | -0.066559 |
| 62 | 8  | 0 | -0.391780 | -0.691469 | -1.231708 |
| 63 | 8  | 0 | -0.861718 | -1.260597 | 1.284090  |
| 64 | 6  | 0 | 2.433923  | 1.455680  | 2.775770  |
| 65 | 1  | 0 | 3.463512  | 1.130749  | 2.848371  |

|    |   |   |           |           |           |
|----|---|---|-----------|-----------|-----------|
| 1  | 6 | 0 | -3.320021 | -4.069229 | -1.324620 |
| 2  | 1 | 0 | -4.194701 | -3.555424 | -0.933684 |
| 3  | 1 | 0 | -3.555788 | -4.856415 | -2.036111 |
| 4  | 6 | 0 | -2.183199 | -4.212860 | -0.529557 |
| 5  | 1 | 0 | -1.459874 | -4.969961 | -0.825946 |
| 6  | 6 | 0 | -2.532041 | -2.246323 | 0.854257  |
| 7  | 1 | 0 | -3.558003 | -2.167078 | 0.516420  |
| 8  | 1 | 0 | -2.841521 | -0.442816 | 1.759968  |
| 9  | 7 | 0 | -2.192644 | -1.214888 | 1.685800  |
| 10 | 6 | 0 | -0.949406 | -0.988479 | 2.289977  |
| 11 | 8 | 0 | -0.969814 | 0.240697  | 2.828295  |
| 12 | 8 | 0 | -0.047501 | -1.791401 | 2.345765  |
| 13 | 1 | 0 | -1.458059 | 0.573841  | -0.529264 |
| 14 | 6 | 0 | -4.448814 | 3.825317  | 1.172322  |
| 15 | 6 | 0 | -5.187760 | 2.911681  | 0.442335  |
| 16 | 6 | 0 | -4.550392 | 1.827516  | -0.197487 |
| 17 | 6 | 0 | -3.140421 | 1.697265  | -0.083986 |
| 18 | 6 | 0 | -2.389541 | 2.626371  | 0.667136  |
| 19 | 6 | 0 | -3.050202 | 3.674694  | 1.283082  |
| 20 | 1 | 0 | -6.320389 | 0.906827  | -1.060496 |
| 21 | 1 | 0 | -4.943431 | 4.657734  | 1.663613  |
| 22 | 1 | 0 | -6.266278 | 3.014578  | 0.352644  |
| 23 | 6 | 0 | -5.240862 | 0.828367  | -0.955695 |
| 24 | 1 | 0 | -1.316158 | 2.488778  | 0.745695  |
| 25 | 1 | 0 | -2.479011 | 4.393964  | 1.863082  |
| 26 | 6 | 0 | -3.142716 | -0.330186 | -1.407566 |
| 27 | 6 | 0 | -4.569497 | -0.205820 | -1.539073 |
| 28 | 1 | 0 | -5.104580 | -0.954240 | -2.111513 |
| 29 | 7 | 0 | -2.509737 | 0.638348  | -0.692388 |
| 30 | 6 | 0 | -2.364981 | -1.390676 | -1.930578 |
| 31 | 1 | 0 | -1.296612 | -1.370888 | -1.720868 |
| 32 | 6 | 0 | -2.857719 | -2.490547 | -2.638442 |
| 33 | 1 | 0 | -3.855821 | -2.474278 | -3.071215 |
| 34 | 1 | 0 | -2.137468 | -3.056718 | -3.218836 |
| 35 | 6 | 0 | 0.308219  | 0.710840  | 3.309965  |
| 36 | 1 | 0 | 0.992218  | 0.811081  | 2.466714  |
| 37 | 1 | 0 | 0.098160  | 1.676897  | 3.770014  |
| 38 | 1 | 0 | 0.716129  | 0.012028  | 4.044510  |
| 39 | 6 | 0 | 4.104412  | 1.190888  | -0.620423 |
| 40 | 6 | 0 | 5.002977  | 2.252571  | -0.426601 |
| 41 | 6 | 0 | 4.738826  | 3.530320  | -0.915763 |
| 42 | 6 | 0 | 3.551782  | 3.775494  | -1.610368 |
| 43 | 6 | 0 | 2.642581  | 2.739627  | -1.816268 |
| 44 | 6 | 0 | 2.918079  | 1.460420  | -1.333403 |
| 45 | 6 | 0 | 4.398116  | -0.160478 | -0.090535 |
| 46 | 6 | 0 | 5.681237  | -0.724185 | -0.176084 |
| 47 | 6 | 0 | 5.953699  | -1.984767 | 0.352300  |
| 48 | 6 | 0 | 4.939281  | -2.714203 | 0.979406  |
| 49 | 6 | 0 | 3.656483  | -2.178203 | 1.077258  |
| 50 | 6 | 0 | 3.398131  | -0.915315 | 0.549160  |
| 51 | 1 | 0 | 5.913097  | 2.066072  | 0.137211  |
| 52 | 1 | 0 | 5.450989  | 4.333143  | -0.745643 |
| 53 | 1 | 0 | 3.333325  | 4.769958  | -1.990562 |
| 54 | 1 | 0 | 1.715629  | 2.892345  | -2.359307 |
| 55 | 1 | 0 | 6.464375  | -0.167081 | -0.683329 |
| 56 | 1 | 0 | 6.953427  | -2.401658 | 0.265839  |

**TS-Cc-(R-ex)**

B3LYP-D3/6-31g(d) in gas phase

SCF Done: E(RB3LYP) = -2023.689597 hartree

Sum of electronic and thermal Free Energies = -2023.244898 hartree

The number of imaginary frequency = 1

Imaginary frequency = -352.86

Center Atomic Atomic Coordinates (Angstroms)  
Number Number Type X Y Z

|    |    |   |           |           |           |
|----|----|---|-----------|-----------|-----------|
| 57 | 1  | 0 | 5.146148  | -3.699560 | 1.388442  |
| 58 | 1  | 0 | 2.840036  | -2.704439 | 1.560668  |
| 59 | 8  | 0 | 2.047663  | 0.441524  | -1.656851 |
| 60 | 8  | 0 | 2.148156  | -0.363357 | 0.741667  |
| 61 | 15 | 0 | 1.078648  | -0.275296 | -0.517031 |
| 62 | 8  | 0 | 0.037045  | 0.714536  | -0.018160 |
| 63 | 8  | 0 | 0.663765  | -1.603519 | -1.053093 |
| 64 | 6  | 0 | -1.761720 | -3.324129 | 0.481383  |
| 65 | 1  | 0 | -0.760571 | -3.415146 | 0.879768  |

-----

**TS-Cc(S-ex)**

B3LYP-D3/6-31g(d) in gas phase

SCF Done: E(RB3LYP) = -2023.689596 hartree

Sum of electronic and thermal Free Energies = -2023.242306 hartree

The number of imaginary frequency = 1

Imaginary frequency = -365.26

| Center Number | Atomic Number | Atomic Type | Coordinates (Angstroms) |           |           |
|---------------|---------------|-------------|-------------------------|-----------|-----------|
|               |               |             | X                       | Y         | Z         |
| 1             | 6             | 0           | -3.523185               | 3.718520  | 1.943594  |
| 2             | 1             | 0           | -4.401384               | 3.094388  | 1.797890  |
| 3             | 1             | 0           | -3.752070               | 4.778068  | 2.023565  |
| 4             | 6             | 0           | -2.437839               | 3.221664  | 2.668542  |
| 5             | 1             | 0           | -1.736759               | 3.944172  | 3.081623  |
| 6             | 6             | 0           | -2.775766               | 0.884177  | 2.105795  |
| 7             | 1             | 0           | -3.770735               | 1.102745  | 1.739235  |
| 8             | 1             | 0           | -3.077254               | -0.989357 | 1.361317  |
| 9             | 7             | 0           | -2.452491               | -0.431685 | 1.928213  |
| 10            | 6             | 0           | -1.233705               | -1.053479 | 2.224085  |
| 11            | 8             | 0           | -1.255606               | -2.274553 | 1.669052  |
| 12            | 8             | 0           | -0.361737               | -0.575346 | 2.912172  |
| 13            | 1             | 0           | -1.382513               | 0.025793  | -0.739932 |
| 14            | 6             | 0           | -4.066720               | -3.523322 | -2.346602 |
| 15            | 6             | 0           | -4.874549               | -2.408610 | -2.212152 |
| 16            | 6             | 0           | -4.330858               | -1.182942 | -1.771948 |
| 17            | 6             | 0           | -2.943028               | -1.115843 | -1.476846 |
| 18            | 6             | 0           | -2.122537               | -2.255849 | -1.608735 |
| 19            | 6             | 0           | -2.691438               | -3.440508 | -2.040983 |
| 20            | 1             | 0           | -6.161826               | -0.011985 | -1.809223 |
| 21            | 1             | 0           | -4.489010               | -4.464244 | -2.686083 |
| 22            | 1             | 0           | -5.935659               | -2.460410 | -2.442668 |
| 23            | 6             | 0           | -5.097109               | 0.012606  | -1.589488 |
| 24            | 1             | 0           | -1.069030               | -2.171441 | -1.362974 |
| 25            | 1             | 0           | -2.065774               | -4.322087 | -2.147459 |
| 26            | 6             | 0           | -3.108231               | 1.219472  | -0.857592 |
| 27            | 6             | 0           | -4.513857               | 1.167001  | -1.155074 |
| 28            | 1             | 0           | -5.103450               | 2.067861  | -1.031928 |
| 29            | 7             | 0           | -2.404516               | 0.068557  | -1.034458 |
| 30            | 6             | 0           | -2.414744               | 2.354805  | -0.373778 |
| 31            | 1             | 0           | -1.337351               | 2.250618  | -0.251702 |
| 32            | 6             | 0           | -2.981346               | 3.597641  | -0.070899 |
| 33            | 1             | 0           | -3.979352               | 3.853856  | -0.420910 |
| 34            | 1             | 0           | -2.299267               | 4.440671  | -0.041154 |
| 35            | 6             | 0           | 4.160305                | -0.555602 | 0.320150  |

|    |    |   |           |           |           |
|----|----|---|-----------|-----------|-----------|
| 36 | 6  | 0 | 5.067658  | -1.575595 | 0.652405  |
| 37 | 6  | 0 | 4.886300  | -2.375571 | 1.778448  |
| 38 | 6  | 0 | 3.780185  | -2.166091 | 2.606023  |
| 39 | 6  | 0 | 2.860052  | -1.165344 | 2.298353  |
| 40 | 6  | 0 | 3.044056  | -0.375992 | 1.162034  |
| 41 | 6  | 0 | 4.398864  | 0.320760  | -0.849503 |
| 42 | 6  | 0 | 5.683635  | 0.811187  | -1.135672 |
| 43 | 6  | 0 | 5.919551  | 1.630774  | -2.237303 |
| 44 | 6  | 0 | 4.862314  | 1.986055  | -3.078974 |
| 45 | 6  | 0 | 3.577797  | 1.514346  | -2.816118 |
| 46 | 6  | 0 | 3.353034  | 0.686768  | -1.717087 |
| 47 | 1  | 0 | 5.920558  | -1.744054 | 0.000468  |
| 48 | 1  | 0 | 5.603300  | -3.159565 | 2.006643  |
| 49 | 1  | 0 | 3.633536  | -2.779341 | 3.491668  |
| 50 | 1  | 0 | 1.988557  | -0.972528 | 2.913172  |
| 51 | 1  | 0 | 6.499634  | 0.558232  | -0.464198 |
| 52 | 1  | 0 | 6.922354  | 2.001828  | -2.430426 |
| 53 | 1  | 0 | 5.035813  | 2.632506  | -3.935105 |
| 54 | 1  | 0 | 2.733434  | 1.769031  | -3.447837 |
| 55 | 8  | 0 | 2.162508  | 0.662428  | 0.949203  |
| 56 | 8  | 0 | 2.093824  | 0.149868  | -1.540663 |
| 57 | 15 | 0 | 1.111561  | 0.701431  | -0.325113 |
| 58 | 8  | 0 | 0.064194  | -0.397080 | -0.186457 |
| 59 | 8  | 0 | 0.681970  | 2.116289  | -0.512439 |
| 60 | 6  | 0 | 0.004544  | -2.974884 | 1.674465  |
| 61 | 1  | 0 | 0.391746  | -3.058975 | 2.692598  |
| 62 | 1  | 0 | -0.216062 | -3.960606 | 1.263473  |
| 63 | 1  | 0 | 0.710887  | -2.431485 | 1.045881  |
| 64 | 6  | 0 | -2.038944 | 1.870499  | 2.725049  |
| 65 | 1  | 0 | -1.084530 | 1.614011  | 3.166391  |

-----

**TS-Ct(R-en)**

B3LYP-D3/6-31g(d) in gas phase

SCF Done: E(RB3LYP) = -2023.707664 hartree

Sum of electronic and thermal Free Energies = -2023.260677 hartree

The number of imaginary frequency = 1

Imaginary frequency = -336.41

| Center Number | Atomic Number | Atomic Type | Coordinates (Angstroms) |           |           |
|---------------|---------------|-------------|-------------------------|-----------|-----------|
|               |               |             | X                       | Y         | Z         |
| 1             | 6             | 0           | -0.121292               | -3.649361 | 1.572146  |
| 2             | 1             | 0           | 0.691832                | -3.140303 | 1.064482  |
| 3             | 1             | 0           | 0.201424                | -4.407372 | 2.281580  |
| 4             | 6             | 0           | -1.355532               | -3.814172 | 0.948791  |
| 5             | 1             | 0           | -2.029290               | -4.557127 | 1.374390  |
| 6             | 6             | 0           | -1.197419               | -1.968494 | -0.656429 |
| 7             | 1             | 0           | -0.128929               | -1.881772 | -0.491551 |
| 8             | 1             | 0           | -0.860909               | -0.412614 | -1.907431 |
| 9             | 7             | 0           | -1.625577               | -1.007415 | -1.518143 |
| 10            | 6             | 0           | -2.900695               | -0.608839 | -1.896287 |
| 11            | 8             | 0           | -3.878265               | -1.345686 | -1.324806 |
| 12            | 8             | 0           | -3.094726               | 0.324481  | -2.645218 |
| 13            | 1             | 0           | -1.004923               | 1.143325  | 0.618386  |
| 14            | 6             | 0           | -5.394164               | 2.829513  | -0.108439 |

|    |    |   |           |           |           |
|----|----|---|-----------|-----------|-----------|
| 15 | 6  | 0 | -5.480983 | 1.746241  | 0.749286  |
| 16 | 6  | 0 | -4.319887 | 1.040909  | 1.128697  |
| 17 | 6  | 0 | -3.065242 | 1.476458  | 0.628829  |
| 18 | 6  | 0 | -2.980467 | 2.572672  | -0.251019 |
| 19 | 6  | 0 | -4.140193 | 3.235123  | -0.610682 |
| 20 | 1  | 0 | -5.273910 | -0.463914 | 2.373196  |
| 21 | 1  | 0 | -6.291796 | 3.365817  | -0.401047 |
| 22 | 1  | 0 | -6.443426 | 1.420476  | 1.136265  |
| 23 | 6  | 0 | -4.323462 | -0.109124 | 1.981930  |
| 24 | 1  | 0 | -2.008890 | 2.862121  | -0.639405 |
| 25 | 1  | 0 | -4.082543 | 4.074573  | -1.296889 |
| 26 | 6  | 0 | -1.903705 | -0.293901 | 1.799941  |
| 27 | 6  | 0 | -3.168058 | -0.757158 | 2.300465  |
| 28 | 1  | 0 | -3.183884 | -1.630555 | 2.940233  |
| 29 | 7  | 0 | -1.928271 | 0.800437  | 0.995493  |
| 30 | 6  | 0 | -0.639097 | -0.857549 | 2.109598  |
| 31 | 1  | 0 | 0.226941  | -0.349284 | 1.700103  |
| 32 | 6  | 0 | -0.428650 | -2.008182 | 2.865580  |
| 33 | 1  | 0 | -1.229552 | -2.437591 | 3.459530  |
| 34 | 1  | 0 | 0.560008  | -2.149596 | 3.292206  |
| 35 | 6  | 0 | -5.210791 | -0.959339 | -1.707883 |
| 36 | 1  | 0 | -5.386687 | 0.091913  | -1.472603 |
| 37 | 1  | 0 | -5.359619 | -1.122001 | -2.778779 |
| 38 | 1  | 0 | -5.872796 | -1.601995 | -1.126207 |
| 39 | 6  | 0 | 4.350440  | -0.465120 | -0.230160 |
| 40 | 6  | 0 | 5.493770  | -1.218208 | -0.540760 |
| 41 | 6  | 0 | 5.401299  | -2.545722 | -0.954433 |
| 42 | 6  | 0 | 4.147749  | -3.148139 | -1.079430 |
| 43 | 6  | 0 | 2.996852  | -2.421522 | -0.778337 |
| 44 | 6  | 0 | 3.098386  | -1.099488 | -0.346612 |
| 45 | 6  | 0 | 4.459466  | 0.944210  | 0.209896  |
| 46 | 6  | 0 | 5.443875  | 1.347883  | 1.126344  |
| 47 | 6  | 0 | 5.558673  | 2.676880  | 1.528395  |
| 48 | 6  | 0 | 4.679015  | 3.636504  | 1.020740  |
| 49 | 6  | 0 | 3.692685  | 3.262068  | 0.110133  |
| 50 | 6  | 0 | 3.592432  | 1.932325  | -0.292075 |
| 51 | 1  | 0 | 6.466091  | -0.737914 | -0.474805 |
| 52 | 1  | 0 | 6.303032  | -3.101779 | -1.194710 |
| 53 | 1  | 0 | 4.063194  | -4.177328 | -1.417214 |
| 54 | 1  | 0 | 2.011614  | -2.864495 | -0.881059 |
| 55 | 1  | 0 | 6.111864  | 0.596546  | 1.538773  |
| 56 | 1  | 0 | 6.325619  | 2.961024  | 2.243521  |
| 57 | 1  | 0 | 4.757867  | 4.673679  | 1.334713  |
| 58 | 1  | 0 | 2.994696  | 3.980046  | -0.306794 |
| 59 | 8  | 0 | 1.950301  | -0.443949 | 0.057805  |
| 60 | 8  | 0 | 2.668114  | 1.605761  | -1.271016 |
| 61 | 15 | 0 | 1.299767  | 0.797905  | -0.862832 |
| 62 | 8  | 0 | 0.703414  | 0.229206  | -2.116002 |
| 63 | 8  | 0 | 0.465054  | 1.597249  | 0.109011  |
| 64 | 6  | 0 | -1.907931 | -2.987678 | -0.051369 |
| 65 | 1  | 0 | -2.950146 | -3.122860 | -0.307175 |

hartree

The number of imaginary frequency = 1

Imaginary frequency = -330.85

| -----  |        |        |                         |           |           |
|--------|--------|--------|-------------------------|-----------|-----------|
| Center | Atomic | Atomic | Coordinates (Angstroms) |           |           |
| Number | Number | Type   | X                       | Y         | Z         |
| -----  |        |        |                         |           |           |
| 1      | 6      | 0      | 1.184000                | 3.012520  | 3.180454  |
| 2      | 1      | 0      | 0.237875                | 2.480788  | 3.198614  |
| 3      | 1      | 0      | 1.139418                | 4.020276  | 3.585186  |
| 4      | 6      | 0      | 2.382868                | 2.312676  | 3.262607  |
| 5      | 1      | 0      | 3.273714                | 2.878702  | 3.532982  |
| 6      | 6      | 0      | 1.576562                | 0.179539  | 2.377811  |
| 7      | 1      | 0      | 0.542165                | 0.481000  | 2.504704  |
| 8      | 1      | 0      | 0.686202                | -1.432704 | 1.577379  |
| 9      | 7      | 0      | 1.629499                | -1.043743 | 1.788840  |
| 10     | 6      | 0      | 2.688794                | -1.790303 | 1.293467  |
| 11     | 8      | 0      | 3.885343                | -1.185855 | 1.461735  |
| 12     | 8      | 0      | 2.531312                | -2.862783 | 0.749929  |
| 13     | 1      | 0      | 0.973073                | 0.026487  | -0.936681 |
| 14     | 6      | 0      | 4.988724                | -1.554257 | -2.898925 |
| 15     | 6      | 0      | 5.261966                | -0.346519 | -2.280970 |
| 16     | 6      | 0      | 4.244444                | 0.349067  | -1.594347 |
| 17     | 6      | 0      | 2.938960                | -0.207640 | -1.565080 |
| 18     | 6      | 0      | 2.665111                | -1.444029 | -2.183477 |
| 19     | 6      | 0      | 3.688893                | -2.101500 | -2.842005 |
| 20     | 1      | 0      | 5.437491                | 2.030312  | -0.908482 |
| 21     | 1      | 0      | 5.775559                | -2.087056 | -3.424449 |
| 22     | 1      | 0      | 6.261905                | 0.079031  | -2.310827 |
| 23     | 6      | 0      | 4.444682                | 1.586912  | -0.906330 |
| 24     | 1      | 0      | 1.661889                | -1.853127 | -2.117799 |
| 25     | 1      | 0      | 3.487589                | -3.057142 | -3.316627 |
| 26     | 6      | 0      | 2.101825                | 1.637672  | -0.249765 |
| 27     | 6      | 0      | 3.420094                | 2.205920  | -0.253723 |
| 28     | 1      | 0      | 3.585849                | 3.137149  | 0.272905  |
| 29     | 7      | 0      | 1.937313                | 0.464551  | -0.909232 |
| 30     | 6      | 0      | 0.962787                | 2.226908  | 0.364967  |
| 31     | 1      | 0      | 0.024919                | 1.692393  | 0.263043  |
| 32     | 6      | 0      | 0.968379                | 3.416640  | 1.086407  |
| 33     | 1      | 0      | 1.805184                | 4.103812  | 1.017296  |
| 34     | 1      | 0      | 0.012150                | 3.899857  | 1.262505  |
| 35     | 6      | 0      | 5.005370                | -1.943229 | 0.966416  |
| 36     | 1      | 0      | 5.112601                | -2.873064 | 1.531569  |
| 37     | 1      | 0      | 4.874145                | -2.173837 | -0.091873 |
| 38     | 1      | 0      | 5.873179                | -1.299977 | 1.115142  |
| 39     | 6      | 0      | -4.284650               | 0.710843  | -0.840047 |
| 40     | 6      | 0      | -5.130974               | 1.375354  | -1.741909 |
| 41     | 6      | 0      | -4.706229               | 2.501541  | -2.443941 |
| 42     | 6      | 0      | -3.409404               | 2.986254  | -2.259971 |
| 43     | 6      | 0      | -2.548087               | 2.344441  | -1.371647 |
| 44     | 6      | 0      | -2.984332               | 1.223143  | -0.667215 |
| 45     | 6      | 0      | -4.751729               | -0.474874 | -0.085907 |
| 46     | 6      | 0      | -6.032929               | -0.513096 | 0.487666  |
| 47     | 6      | 0      | -6.481170               | -1.631436 | 1.187330  |
| 48     | 6      | 0      | -5.646242               | -2.742134 | 1.333649  |
| 49     | 6      | 0      | -4.369709               | -2.729960 | 0.774476  |
| 50     | 6      | 0      | -3.934913               | -1.609941 | 0.069740  |

**TS-Ct(S-en)**

B3LYP-D3/6-31g(d) in gas phase

SCF Done: E(RB3LYP) = -2023.707807 hartree

Sum of electronic and thermal Free Energies = -2023.260101

|    |    |   |           |           |           |
|----|----|---|-----------|-----------|-----------|
| 51 | 1  | 0 | -6.130791 | 0.981645  | -1.902690 |
| 52 | 1  | 0 | -5.380854 | 2.991112  | -3.140684 |
| 53 | 1  | 0 | -3.066136 | 3.858805  | -2.809234 |
| 54 | 1  | 0 | -1.535915 | 2.700415  | -1.209189 |
| 55 | 1  | 0 | -6.671684 | 0.361074  | 0.395195  |
| 56 | 1  | 0 | -7.474746 | -1.631612 | 1.626860  |
| 57 | 1  | 0 | -5.985646 | -3.615038 | 1.884438  |
| 58 | 1  | 0 | -3.695776 | -3.575035 | 0.865429  |
| 59 | 8  | 0 | -2.143529 | 0.672083  | 0.283547  |
| 60 | 8  | 0 | -2.703674 | -1.664788 | -0.562338 |
| 61 | 15 | 0 | -1.433061 | -0.813773 | 0.032867  |
| 62 | 8  | 0 | -0.433668 | -0.708456 | -1.094377 |
| 63 | 8  | 0 | -1.008340 | -1.285592 | 1.395415  |
| 64 | 6  | 0 | 2.601399  | 0.986067  | 2.836914  |
| 65 | 1  | 0 | 3.618384  | 0.620324  | 2.793848  |

-----  
**TS-Ct(R-ex)**

B3LYP-D3/6-31g(d) in gas phase

SCF Done: E(RB3LYP) = -2023.687304 hartree

Sum of electronic and thermal Free Energies = -2023.240457 hartree

The number of imaginary frequency = 1

Imaginary frequency = -350.83

-----

| Center Number | Atomic Number | Atomic Type | Coordinates (Angstroms) |           |           |
|---------------|---------------|-------------|-------------------------|-----------|-----------|
|               |               |             | X                       | Y         | Z         |
| 1             | 6             | 0           | 2.323006                | -2.788704 | 3.438304  |
| 2             | 1             | 0           | 3.349987                | -2.546688 | 3.176423  |
| 3             | 1             | 0           | 2.200490                | -3.100673 | 4.472367  |
| 4             | 6             | 0           | 1.474267                | -3.342179 | 2.475967  |
| 5             | 1             | 0           | 0.576134                | -3.844393 | 2.830262  |
| 6             | 6             | 0           | 2.557894                | -2.380678 | 0.528746  |
| 7             | 1             | 0           | 3.403719                | -2.095812 | 1.144214  |
| 8             | 1             | 0           | 3.510296                | -1.341263 | -0.935083 |
| 9             | 7             | 0           | 2.724529                | -1.952793 | -0.756827 |
| 10            | 6             | 0           | 1.896256                | -2.036458 | -1.894757 |
| 11            | 8             | 0           | 0.944228                | -2.945629 | -1.746585 |
| 12            | 8             | 0           | 2.135358                | -1.365430 | -2.875580 |
| 13            | 1             | 0           | 1.105579                | 0.411835  | -0.106248 |
| 14            | 6             | 0           | 4.363730                | 2.890225  | -2.498945 |
| 15            | 6             | 0           | 4.859404                | 2.648338  | -1.230427 |
| 16            | 6             | 0           | 4.083692                | 1.941726  | -0.286592 |
| 17            | 6             | 0           | 2.786635                | 1.500422  | -0.661928 |
| 18            | 6             | 0           | 2.290555                | 1.732507  | -1.960336 |
| 19            | 6             | 0           | 3.081899                | 2.422835  | -2.860361 |
| 20            | 1             | 0           | 5.520892                | 1.936652  | 1.343419  |
| 21            | 1             | 0           | 4.964086                | 3.432142  | -3.223416 |
| 22            | 1             | 0           | 5.850152                | 2.993267  | -0.945307 |
| 23            | 6             | 0           | 4.529565                | 1.614017  | 1.033856  |
| 24            | 1             | 0           | 1.314819                | 1.340808  | -2.227812 |
| 25            | 1             | 0           | 2.710794                | 2.599914  | -3.865392 |
| 26            | 6             | 0           | 2.423178                | 0.487967  | 1.506183  |
| 27            | 6             | 0           | 3.738059                | 0.913672  | 1.898020  |
| 28            | 1             | 0           | 4.083626                | 0.680686  | 2.898494  |
| 29            | 7             | 0           | 2.024486                | 0.810952  | 0.247749  |

|    |    |   |           |           |           |
|----|----|---|-----------|-----------|-----------|
| 30 | 6  | 0 | 1.515352  | -0.235582 | 2.314335  |
| 31 | 1  | 0 | 0.538578  | -0.412764 | 1.881573  |
| 32 | 6  | 0 | 1.754516  | -0.778798 | 3.580280  |
| 33 | 1  | 0 | 2.631906  | -0.479829 | 4.149867  |
| 34 | 1  | 0 | 0.883542  | -0.982604 | 4.193741  |
| 35 | 6  | 0 | -0.095160 | -2.929246 | -2.748167 |
| 36 | 1  | 0 | -0.393311 | -1.898797 | -2.944627 |
| 37 | 1  | 0 | 0.267169  | -3.404785 | -3.663911 |
| 38 | 1  | 0 | -0.917667 | -3.483661 | -2.300685 |
| 39 | 6  | 0 | -3.277359 | 1.746639  | 0.493136  |
| 40 | 6  | 0 | -3.579681 | 3.117388  | 0.472182  |
| 41 | 6  | 0 | -2.676284 | 4.070046  | 0.939750  |
| 42 | 6  | 0 | -1.438658 | 3.663777  | 1.443300  |
| 43 | 6  | 0 | -1.113426 | 2.308693  | 1.475434  |
| 44 | 6  | 0 | -2.022562 | 1.361114  | 1.004843  |
| 45 | 6  | 0 | -4.254164 | 0.741058  | 0.015709  |
| 46 | 6  | 0 | -5.614681 | 0.835555  | 0.348916  |
| 47 | 6  | 0 | -6.539737 | -0.101903 | -0.106219 |
| 48 | 6  | 0 | -6.115214 | -1.165677 | -0.906334 |
| 49 | 6  | 0 | -4.769886 | -1.281822 | -1.251282 |
| 50 | 6  | 0 | -3.852742 | -0.334927 | -0.798806 |
| 51 | 1  | 0 | -4.535490 | 3.432093  | 0.062176  |
| 52 | 1  | 0 | -2.934655 | 5.124732  | 0.903831  |
| 53 | 1  | 0 | -0.726656 | 4.398495  | 1.809940  |
| 54 | 1  | 0 | -0.166737 | 1.964747  | 1.878429  |
| 55 | 1  | 0 | -5.938442 | 1.649182  | 0.992446  |
| 56 | 1  | 0 | -7.585793 | -0.009217 | 0.172373  |
| 57 | 1  | 0 | -6.828693 | -1.905621 | -1.258843 |
| 58 | 1  | 0 | -4.407140 | -2.092911 | -1.873780 |
| 59 | 8  | 0 | -1.707514 | 0.022274  | 1.131388  |
| 60 | 8  | 0 | -2.547874 | -0.409936 | -1.242168 |
| 61 | 15 | 0 | -1.336600 | -0.888090 | -0.217683 |
| 62 | 8  | 0 | -0.081492 | -0.310742 | -0.849240 |
| 63 | 8  | 0 | -1.434608 | -2.322331 | 0.168140  |
| 64 | 6  | 0 | 1.533518  | -3.116636 | 1.085408  |
| 65 | 1  | 0 | 0.692123  | -3.417166 | 0.475398  |

-----  
**TS-Ct(S-ex)**

Not Detected.

-----  
**TS-Tc(R-en)**

B3LYP-D3/6-31g(d) in gas phase

SCF Done: E(RB3LYP) = -2023.694312 hartree

Sum of electronic and thermal Free Energies = -2023.248883 hartree

The number of imaginary frequency = 1

Imaginary frequency = -390.00

-----

| Center Number | Atomic Number | Atomic Type | Coordinates (Angstroms) |          |          |
|---------------|---------------|-------------|-------------------------|----------|----------|
|               |               |             | X                       | Y        | Z        |
| 1             | 6             | 0           | -1.113075               | 4.441074 | 0.548393 |
| 2             | 1             | 0           | -0.283422               | 3.741966 | 0.463831 |
| 3             | 1             | 0           | -0.857955               | 5.481133 | 0.355151 |
| 4             | 6             | 0           | -2.140173               | 4.207271 | 1.468458 |

|    |    |   |           |           |           |
|----|----|---|-----------|-----------|-----------|
| 5  | 1  | 0 | -2.779679 | 5.048223  | 1.734565  |
| 6  | 6  | 0 | -1.946471 | 1.746149  | 1.652386  |
| 7  | 1  | 0 | -0.950993 | 1.657229  | 1.211696  |
| 8  | 1  | 0 | -3.512598 | 0.609643  | 2.359477  |
| 9  | 7  | 0 | -2.573898 | 0.574385  | 1.979446  |
| 10 | 6  | 0 | -2.026694 | -0.698085 | 1.854313  |
| 11 | 8  | 0 | -2.932528 | -1.592115 | 2.304820  |
| 12 | 8  | 0 | -0.932362 | -0.953712 | 1.411314  |
| 13 | 1  | 0 | -1.083445 | 0.107831  | -1.384435 |
| 14 | 6  | 0 | -4.382971 | -3.301543 | -1.131180 |
| 15 | 6  | 0 | -5.015252 | -2.078115 | -0.978768 |
| 16 | 6  | 0 | -4.277046 | -0.879691 | -1.044674 |
| 17 | 6  | 0 | -2.876750 | -0.951952 | -1.263810 |
| 18 | 6  | 0 | -2.230764 | -2.197053 | -1.402243 |
| 19 | 6  | 0 | -2.989716 | -3.354362 | -1.343973 |
| 20 | 1  | 0 | -5.917560 | 0.513353  | -0.724598 |
| 21 | 1  | 0 | -4.958663 | -4.221188 | -1.086996 |
| 22 | 1  | 0 | -6.088333 | -2.026990 | -0.811219 |
| 23 | 6  | 0 | -4.846678 | 0.429664  | -0.895389 |
| 24 | 1  | 0 | -1.153749 | -2.214593 | -1.540613 |
| 25 | 1  | 0 | -2.500762 | -4.317772 | -1.460207 |
| 26 | 6  | 0 | -2.662244 | 1.456872  | -1.208530 |
| 27 | 6  | 0 | -4.079485 | 1.553193  | -0.983837 |
| 28 | 1  | 0 | -4.521636 | 2.537400  | -0.882144 |
| 29 | 7  | 0 | -2.146076 | 0.204025  | -1.325941 |
| 30 | 6  | 0 | -1.760583 | 2.532542  | -1.370484 |
| 31 | 1  | 0 | -0.740179 | 2.247240  | -1.595325 |
| 32 | 6  | 0 | -2.003224 | 3.899442  | -1.187395 |
| 33 | 1  | 0 | -3.020830 | 4.261552  | -1.062677 |
| 34 | 1  | 0 | -1.372026 | 4.582230  | -1.750684 |
| 35 | 6  | 0 | -2.489070 | -2.961944 | 2.280862  |
| 36 | 1  | 0 | -1.596240 | -3.081768 | 2.900543  |
| 37 | 1  | 0 | -3.320396 | -3.539192 | 2.685923  |
| 38 | 1  | 0 | -2.270711 | -3.269289 | 1.256952  |
| 39 | 6  | 0 | 3.879632  | -1.453569 | 0.028387  |
| 40 | 6  | 0 | 4.522753  | -2.673271 | -0.237422 |
| 41 | 6  | 0 | 3.845676  | -3.886498 | -0.127639 |
| 42 | 6  | 0 | 2.499698  | -3.903312 | 0.250310  |
| 43 | 6  | 0 | 1.836657  | -2.707214 | 0.519341  |
| 44 | 6  | 0 | 2.527577  | -1.501099 | 0.412546  |
| 45 | 6  | 0 | 4.595282  | -0.159682 | -0.056822 |
| 46 | 6  | 0 | 5.900293  | -0.028061 | 0.445145  |
| 47 | 6  | 0 | 6.591579  | 1.179527  | 0.376294  |
| 48 | 6  | 0 | 5.978934  | 2.296391  | -0.196792 |
| 49 | 6  | 0 | 4.684310  | 2.194091  | -0.701515 |
| 50 | 6  | 0 | 4.000087  | 0.979945  | -0.637646 |
| 51 | 1  | 0 | 5.562232  | -2.658544 | -0.554003 |
| 52 | 1  | 0 | 4.364321  | -4.816013 | -0.346537 |
| 53 | 1  | 0 | 1.967422  | -4.847839 | 0.332010  |
| 54 | 1  | 0 | 0.795274  | -2.668891 | 0.819925  |
| 55 | 1  | 0 | 6.364390  | -0.890946 | 0.915293  |
| 56 | 1  | 0 | 7.598147  | 1.251307  | 0.779128  |
| 57 | 1  | 0 | 6.505934  | 3.245405  | -0.249815 |
| 58 | 1  | 0 | 4.182343  | 3.039183  | -1.161066 |
| 59 | 8  | 0 | 1.884091  | -0.332645 | 0.763894  |
| 60 | 8  | 0 | 2.773312  | 0.900046  | -1.259891 |
| 61 | 15 | 0 | 1.355302  | 0.669278  | -0.432946 |

|    |   |   |           |           |           |
|----|---|---|-----------|-----------|-----------|
| 62 | 8 | 0 | 0.467735  | -0.064550 | -1.416711 |
| 63 | 8 | 0 | 0.872744  | 1.925852  | 0.229159  |
| 64 | 6 | 0 | -2.565326 | 2.946595  | 1.927717  |
| 65 | 1 | 0 | -3.506262 | 2.914457  | 2.478590  |

-----

**TS-Tc(S-en)**

B3LYP-D3/6-31g(d) in gas phase

SCF Done: E(RB3LYP) = -2023.693798 hartree

Sum of electronic and thermal Free Energies = -2023.248044 hartree

The number of imaginary frequency = 1

Imaginary frequency = -385.27

-----

| Center Number | Atomic Number | Atomic Type | Coordinates (Angstroms) |           |           |
|---------------|---------------|-------------|-------------------------|-----------|-----------|
|               |               |             | X                       | Y         | Z         |
| 1             | 6             | 0           | 1.332021                | 4.286239  | -0.267166 |
| 2             | 1             | 0           | 0.484478                | 3.607565  | -0.194582 |
| 3             | 1             | 0           | 1.089707                | 5.284321  | -0.626337 |
| 4             | 6             | 0           | 2.401712                | 4.178914  | 0.628355  |
| 5             | 1             | 0           | 3.086238                | 5.023732  | 0.696698  |
| 6             | 6             | 0           | 2.093676                | 1.823097  | 1.297907  |
| 7             | 1             | 0           | 1.053327                | 1.728606  | 0.972012  |
| 8             | 1             | 0           | 3.680608                | 0.641703  | 1.887350  |
| 9             | 7             | 0           | 2.677486                | 0.671903  | 1.746969  |
| 10            | 6             | 0           | 1.988889                | -0.514488 | 1.987549  |
| 11            | 8             | 0           | 2.888893                | -1.481190 | 2.263531  |
| 12            | 8             | 0           | 0.788556                | -0.644572 | 1.956699  |
| 13            | 1             | 0           | 1.105683                | -0.314872 | -1.475006 |
| 14            | 6             | 0           | 4.295973                | -3.695878 | -0.473495 |
| 15            | 6             | 0           | 4.963085                | -2.483893 | -0.558722 |
| 16            | 6             | 0           | 4.261846                | -1.302860 | -0.869096 |
| 17            | 6             | 0           | 2.861826                | -1.377679 | -1.087026 |
| 18            | 6             | 0           | 2.181940                | -2.607511 | -0.990863 |
| 19            | 6             | 0           | 2.904752                | -3.751150 | -0.692021 |
| 20            | 1             | 0           | 5.942367                | 0.078724  | -0.814298 |
| 21            | 1             | 0           | 4.844008                | -4.604023 | -0.240859 |
| 22            | 1             | 0           | 6.035971                | -2.430284 | -0.390421 |
| 23            | 6             | 0           | 4.869487                | -0.005862 | -0.972243 |
| 24            | 1             | 0           | 1.107120                | -2.624678 | -1.147713 |
| 25            | 1             | 0           | 2.387680                | -4.704146 | -0.622120 |
| 26            | 6             | 0           | 2.715945                | 1.005073  | -1.493871 |
| 27            | 6             | 0           | 4.135757                | 1.100793  | -1.281095 |
| 28            | 1             | 0           | 4.606602                | 2.073065  | -1.366375 |
| 29            | 7             | 0           | 2.164689                | -0.234204 | -1.379284 |
| 30            | 6             | 0           | 1.847668                | 2.058510  | -1.852979 |
| 31            | 1             | 0           | 0.817758                | 1.768305  | -2.018723 |
| 32            | 6             | 0           | 2.135529                | 3.427664  | -1.918170 |
| 33            | 1             | 0           | 3.166296                | 3.771445  | -1.885594 |
| 34            | 1             | 0           | 1.507066                | 4.023766  | -2.575122 |
| 35            | 6             | 0           | 2.313081                | -2.757763 | 2.599701  |
| 36            | 1             | 0           | 1.587316                | -3.056032 | 1.842167  |
| 37            | 1             | 0           | 3.151924                | -3.452727 | 2.622836  |
| 38            | 1             | 0           | 1.823940                | -2.703328 | 3.576684  |
| 39            | 6             | 0           | -4.512370               | -0.454517 | -0.469695 |
| 40            | 6             | 0           | -5.631737               | -1.243976 | -0.779637 |

|    |    |   |           |           |           |
|----|----|---|-----------|-----------|-----------|
| 41 | 6  | 0 | -5.968098 | -1.548199 | -2.097036 |
| 42 | 6  | 0 | -5.175894 | -1.069324 | -3.143234 |
| 43 | 6  | 0 | -4.058902 | -0.284509 | -2.863758 |
| 44 | 6  | 0 | -3.733847 | 0.024772  | -1.543232 |
| 45 | 6  | 0 | -4.170275 | -0.140980 | 0.936690  |
| 46 | 6  | 0 | -5.156498 | 0.199393  | 1.876541  |
| 47 | 6  | 0 | -4.827866 | 0.469282  | 3.203686  |
| 48 | 6  | 0 | -3.494434 | 0.407837  | 3.619132  |
| 49 | 6  | 0 | -2.495131 | 0.073161  | 2.706986  |
| 50 | 6  | 0 | -2.838079 | -0.202300 | 1.384717  |
| 51 | 1  | 0 | -6.230566 | -1.638457 | 0.036924  |
| 52 | 1  | 0 | -6.837091 | -2.166470 | -2.305094 |
| 53 | 1  | 0 | -5.424689 | -1.307234 | -4.174081 |
| 54 | 1  | 0 | -3.425506 | 0.109199  | -3.651807 |
| 55 | 1  | 0 | -6.189762 | 0.271130  | 1.547522  |
| 56 | 1  | 0 | -5.609214 | 0.738005  | 3.909547  |
| 57 | 1  | 0 | -3.233048 | 0.624581  | 4.651743  |
| 58 | 1  | 0 | -1.448435 | 0.010172  | 2.983494  |
| 59 | 8  | 0 | -2.691915 | 0.900807  | -1.321206 |
| 60 | 8  | 0 | -1.849663 | -0.622739 | 0.517156  |
| 61 | 15 | 0 | -1.271805 | 0.425308  | -0.613952 |
| 62 | 8  | 0 | -0.465152 | -0.427172 | -1.573441 |
| 63 | 8  | 0 | -0.667094 | 1.662152  | -0.018052 |
| 64 | 6  | 0 | 2.806942  | 3.002553  | 1.285992  |
| 65 | 1  | 0 | 3.791073  | 3.007742  | 1.755637  |

-----

**TS-Tc(R-ex)**

B3LYP-D3/6-31g(d) in gas phase

SCF Done: E(RB3LYP) = -2023.714856 hartree

Sum of electronic and thermal Free Energies = -2023.266667 hartree

The number of imaginary frequency = 1

Imaginary frequency = -352.47

| Center Number | Atomic Number | Atomic Type | Coordinates (Angstroms) |           |           |
|---------------|---------------|-------------|-------------------------|-----------|-----------|
|               |               |             | X                       | Y         | Z         |
| 1             | 6             | 0           | 4.746135                | 3.277321  | 1.086334  |
| 2             | 1             | 0           | 5.206095                | 2.293163  | 1.100738  |
| 3             | 1             | 0           | 5.451779                | 4.097421  | 0.981163  |
| 4             | 6             | 0           | 3.557832                | 3.499546  | 1.778443  |
| 5             | 1             | 0           | 3.275613                | 4.533035  | 1.972969  |
| 6             | 6             | 0           | 2.787556                | 1.182327  | 1.799425  |
| 7             | 1             | 0           | 3.767970                | 0.782313  | 1.566571  |
| 8             | 1             | 0           | 0.824858                | 0.563098  | 1.970205  |
| 9             | 7             | 0           | 1.817897                | 0.240011  | 1.899052  |
| 10            | 6             | 0           | 2.106235                | -1.100549 | 1.702207  |
| 11            | 8             | 0           | 0.971607                | -1.822411 | 1.769259  |
| 12            | 8             | 0           | 3.214637                | -1.556859 | 1.493000  |
| 13            | 1             | 0           | 1.065782                | 0.561953  | -1.153206 |
| 14            | 6             | 0           | 1.725408                | -4.057163 | -2.090744 |
| 15            | 6             | 0           | 2.964987                | -3.445830 | -2.022218 |
| 16            | 6             | 0           | 3.065951                | -2.062920 | -1.761537 |
| 17            | 6             | 0           | 1.874232                | -1.317325 | -1.567485 |
| 18            | 6             | 0           | 0.612135                | -1.942519 | -1.626692 |
| 19            | 6             | 0           | 0.551659                | -3.299103 | -1.891658 |

|    |    |   |           |           |           |
|----|----|---|-----------|-----------|-----------|
| 20 | 1  | 0 | 5.231071  | -1.907752 | -1.824025 |
| 21 | 1  | 0 | 1.653493  | -5.121366 | -2.294435 |
| 22 | 1  | 0 | 3.876026  | -4.020250 | -2.168515 |
| 23 | 6  | 0 | 4.305878  | -1.354471 | -1.685013 |
| 24 | 1  | 0 | -0.283603 | -1.357855 | -1.445442 |
| 25 | 1  | 0 | -0.417742 | -3.786941 | -1.938274 |
| 26 | 6  | 0 | 3.126921  | 0.726245  | -1.244817 |
| 27 | 6  | 0 | 4.339940  | -0.013435 | -1.442685 |
| 28 | 1  | 0 | 5.285276  | 0.513124  | -1.388051 |
| 29 | 7  | 0 | 1.963883  | 0.028136  | -1.310059 |
| 30 | 6  | 0 | 3.038463  | 2.121491  | -1.004446 |
| 31 | 1  | 0 | 2.030723  | 2.504776  | -0.874327 |
| 32 | 6  | 0 | 4.107228  | 3.014100  | -0.930611 |
| 33 | 1  | 0 | 5.096207  | 2.718436  | -1.271868 |
| 34 | 1  | 0 | 3.888337  | 4.065566  | -1.079626 |
| 35 | 6  | 0 | 1.139825  | -3.241553 | 1.610733  |
| 36 | 1  | 0 | 1.657779  | -3.657616 | 2.480049  |
| 37 | 1  | 0 | 0.128507  | -3.641689 | 1.537660  |
| 38 | 1  | 0 | 1.705781  | -3.464858 | 0.705559  |
| 39 | 6  | 0 | -4.249073 | 0.527175  | -0.573550 |
| 40 | 6  | 0 | -5.259022 | 0.282918  | -1.518155 |
| 41 | 6  | 0 | -5.488583 | 1.155412  | -2.579904 |
| 42 | 6  | 0 | -4.699174 | 2.299080  | -2.722984 |
| 43 | 6  | 0 | -3.689887 | 2.565644  | -1.799592 |
| 44 | 6  | 0 | -3.473827 | 1.692453  | -0.735555 |
| 45 | 6  | 0 | -4.018297 | -0.402425 | 0.555987  |
| 46 | 6  | 0 | -5.085112 | -0.958572 | 1.279662  |
| 47 | 6  | 0 | -4.861545 | -1.834450 | 2.340566  |
| 48 | 6  | 0 | -3.554697 | -2.163850 | 2.710037  |
| 49 | 6  | 0 | -2.477114 | -1.627003 | 2.007134  |
| 50 | 6  | 0 | -2.714266 | -0.768540 | 0.935939  |
| 51 | 1  | 0 | -5.855692 | -0.619941 | -1.419581 |
| 52 | 1  | 0 | -6.273495 | 0.937772  | -3.298896 |
| 53 | 1  | 0 | -4.866276 | 2.981400  | -3.551929 |
| 54 | 1  | 0 | -3.061829 | 3.446783  | -1.876526 |
| 55 | 1  | 0 | -6.100008 | -0.675400 | 1.014213  |
| 56 | 1  | 0 | -5.704998 | -2.244333 | 2.889202  |
| 57 | 1  | 0 | -3.374323 | -2.831216 | 3.548574  |
| 58 | 1  | 0 | -1.447851 | -1.842057 | 2.271323  |
| 59 | 8  | 0 | -2.536187 | 2.046097  | 0.219847  |
| 60 | 8  | 0 | -1.639063 | -0.330372 | 0.183994  |
| 61 | 15 | 0 | -1.110543 | 1.238066  | 0.337386  |
| 62 | 8  | 0 | -0.248764 | 1.462707  | -0.882897 |
| 63 | 8  | 0 | -0.577002 | 1.479533  | 1.723072  |
| 64 | 6  | 0 | 2.579259  | 2.523084  | 2.047579  |
| 65 | 1  | 0 | 1.590089  | 2.832354  | 2.374113  |

-----

**TS-Tc(S-ex)**

B3LYP-D3/6-31g(d) in gas phase

SCF Done: E(RB3LYP) = -2023.710495 hartree

Sum of electronic and thermal Free Energies = -2023.265121 hartree

The number of imaginary frequency = 1

Imaginary frequency = -348.50

-----

| Center | Atomic | Atomic | Coordinates (Angstroms) |
|--------|--------|--------|-------------------------|
|--------|--------|--------|-------------------------|

| Number | Number | Type | X         | Y         | Z         |
|--------|--------|------|-----------|-----------|-----------|
| 1      | 6      | 0    | -3.619777 | 4.276130  | -0.904269 |
| 2      | 1      | 0    | -4.369552 | 3.649757  | -0.429461 |
| 3      | 1      | 0    | -4.027674 | 5.112135  | -1.466486 |
| 4      | 6      | 0    | -2.356570 | 4.405108  | -0.331567 |
| 5      | 1      | 0    | -1.735703 | 5.234443  | -0.666888 |
| 6      | 6      | 0    | -2.382826 | 2.310960  | 0.925658  |
| 7      | 1      | 0    | -3.459126 | 2.203300  | 0.847443  |
| 8      | 1      | 0    | -0.723925 | 1.239580  | 1.561678  |
| 9      | 7      | 0    | -1.773227 | 1.285115  | 1.562546  |
| 10     | 6      | 0    | -2.509587 | 0.222867  | 2.065198  |
| 11     | 8      | 0    | -1.674831 | -0.689110 | 2.592170  |
| 12     | 8      | 0    | -3.722565 | 0.128760  | 2.026328  |
| 13     | 1      | 0    | -1.170906 | -0.127492 | -1.078355 |
| 14     | 6      | 0    | -3.181081 | -4.176996 | 0.366312  |
| 15     | 6      | 0    | -4.187261 | -3.317063 | -0.038914 |
| 16     | 6      | 0    | -3.875532 | -2.026942 | -0.517726 |
| 17     | 6      | 0    | -2.513608 | -1.635920 | -0.576217 |
| 18     | 6      | 0    | -1.491338 | -2.503629 | -0.142191 |
| 19     | 6      | 0    | -1.832420 | -3.762775 | 0.316758  |
| 20     | 1      | 0    | -5.901211 | -1.348106 | -0.911156 |
| 21     | 1      | 0    | -3.427617 | -5.169524 | 0.731164  |
| 22     | 1      | 0    | -5.229252 | -3.622735 | 0.007162  |
| 23     | 6      | 0    | -4.850067 | -1.075326 | -0.956215 |
| 24     | 1      | 0    | -0.463627 | -2.156407 | -0.164812 |
| 25     | 1      | 0    | -1.050161 | -4.437691 | 0.652465  |
| 26     | 6      | 0    | -3.096849 | 0.525373  | -1.486406 |
| 27     | 6      | 0    | -4.480784 | 0.151670  | -1.422481 |
| 28     | 1      | 0    | -5.227513 | 0.862524  | -1.755741 |
| 29     | 7      | 0    | -2.194930 | -0.389123 | -1.047505 |
| 30     | 6      | 0    | -2.585343 | 1.749011  | -1.988124 |
| 31     | 1      | 0    | -1.501979 | 1.827025  | -1.988336 |
| 32     | 6      | 0    | -3.327748 | 2.829920  | -2.458804 |
| 33     | 1      | 0    | -4.391817 | 2.725327  | -2.655735 |
| 34     | 1      | 0    | -2.825874 | 3.534547  | -3.112306 |
| 35     | 6      | 0    | -2.319178 | -1.817678 | 3.205271  |
| 36     | 1      | 0    | -2.993108 | -2.307951 | 2.500795  |
| 37     | 1      | 0    | -1.509252 | -2.488522 | 3.491225  |
| 38     | 1      | 0    | -2.882326 | -1.496910 | 4.086764  |
| 39     | 6      | 0    | 4.232565  | -1.039631 | -0.461902 |
| 40     | 6      | 0    | 5.143184  | -1.856096 | -1.151732 |
| 41     | 6      | 0    | 4.778359  | -3.111636 | -1.632611 |
| 42     | 6      | 0    | 3.477192  | -3.577976 | -1.434085 |
| 43     | 6      | 0    | 2.553729  | -2.786296 | -0.754161 |
| 44     | 6      | 0    | 2.925987  | -1.531810 | -0.272119 |
| 45     | 6      | 0    | 4.644256  | 0.283691  | 0.058930  |
| 46     | 6      | 0    | 5.886144  | 0.464104  | 0.689104  |
| 47     | 6      | 0    | 6.282964  | 1.711912  | 1.165113  |
| 48     | 6      | 0    | 5.434722  | 2.813184  | 1.024047  |
| 49     | 6      | 0    | 4.196319  | 2.660322  | 0.403467  |
| 50     | 6      | 0    | 3.813101  | 1.410102  | -0.076503 |
| 51     | 1      | 0    | 6.148016  | -1.480955 | -1.325136 |
| 52     | 1      | 0    | 5.502951  | -3.717950 | -2.168820 |
| 53     | 1      | 0    | 3.179391  | -4.553289 | -1.809425 |
| 54     | 1      | 0    | 1.539297  | -3.129484 | -0.581228 |
| 55     | 1      | 0    | 6.533955  | -0.398114 | 0.821521  |

|    |    |   |           |           |           |
|----|----|---|-----------|-----------|-----------|
| 56 | 1  | 0 | 7.246279  | 1.822099  | 1.655240  |
| 57 | 1  | 0 | 5.733773  | 3.787789  | 1.399978  |
| 58 | 1  | 0 | 3.512766  | 3.492854  | 0.275815  |
| 59 | 8  | 0 | 2.013441  | -0.823759 | 0.487329  |
| 60 | 8  | 0 | 2.622322  | 1.304955  | -0.775021 |
| 61 | 15 | 0 | 1.326865  | 0.580169  | -0.067776 |
| 62 | 8  | 0 | 0.367737  | 0.269019  | -1.191838 |
| 63 | 8  | 0 | 0.872627  | 1.342240  | 1.147549  |
| 64 | 6  | 0 | -1.725125 | 3.436979  | 0.472866  |
| 65 | 1  | 0 | -0.662111 | 3.523076  | 0.681668  |

**TS-Tt(R-en)**

B3LYP-D3/6-31g(d) in gas phase

SCF Done: E(RB3LYP) = -2023.698467 hartree

Sum of electronic and thermal Free Energies = -2023.251588 hartree

The number of imaginary frequency = 1

Imaginary frequency = -348.02

| Center Number | Atomic Number | Atomic Type | Coordinates (Angstroms) |           |           |
|---------------|---------------|-------------|-------------------------|-----------|-----------|
|               |               |             | X                       | Y         | Z         |
| 1             | 6             | 0           | -1.174458               | 4.024303  | 1.153009  |
| 2             | 1             | 0           | -0.363902               | 3.312077  | 1.290851  |
| 3             | 1             | 0           | -0.869089               | 5.067827  | 1.113012  |
| 4             | 6             | 0           | -2.451863               | 3.747713  | 1.645303  |
| 5             | 1             | 0           | -3.162269               | 4.572523  | 1.691551  |
| 6             | 6             | 0           | -2.219082               | 1.309605  | 1.897169  |
| 7             | 1             | 0           | -1.128314               | 1.308397  | 1.906421  |
| 8             | 1             | 0           | -3.782465               | -0.012913 | 1.660371  |
| 9             | 7             | 0           | -2.801193               | 0.078039  | 1.897744  |
| 10            | 6             | 0           | -2.173030               | -1.160786 | 2.093222  |
| 11            | 8             | 0           | -0.977875               | -1.013322 | 2.657502  |
| 12            | 8             | 0           | -2.723349               | -2.202754 | 1.803369  |
| 13            | 1             | 0           | -1.218877               | -0.314316 | -0.859334 |
| 14            | 6             | 0           | -5.054285               | -2.959667 | -1.749517 |
| 15            | 6             | 0           | -5.429003               | -1.627284 | -1.785322 |
| 16            | 6             | 0           | -4.471855               | -0.612250 | -1.583698 |
| 17            | 6             | 0           | -3.121707               | -0.983223 | -1.352085 |
| 18            | 6             | 0           | -2.746001               | -2.338469 | -1.302449 |
| 19            | 6             | 0           | -3.711533               | -3.309203 | -1.502552 |
| 20            | 1             | 0           | -5.804166               | 1.098838  | -1.748473 |
| 21            | 1             | 0           | -5.795550               | -3.737926 | -1.903807 |
| 22            | 1             | 0           | -6.463419               | -1.346331 | -1.967435 |
| 23            | 6             | 0           | -4.775251               | 0.789435  | -1.580058 |
| 24            | 1             | 0           | -1.712459               | -2.589617 | -1.087734 |
| 25            | 1             | 0           | -3.429158               | -4.356875 | -1.458585 |
| 26            | 6             | 0           | -2.436748               | 1.335306  | -1.170188 |
| 27            | 6             | 0           | -3.804654               | 1.725814  | -1.382123 |
| 28            | 1             | 0           | -4.044981               | 2.781948  | -1.394174 |
| 29            | 7             | 0           | -2.181034               | -0.001422 | -1.155267 |
| 30            | 6             | 0           | -1.344348               | 2.219646  | -1.022084 |
| 31            | 1             | 0           | -0.360575               | 1.770770  | -0.992756 |
| 32            | 6             | 0           | -1.406537               | 3.605659  | -0.848361 |
| 33            | 1             | 0           | -2.326248               | 4.146065  | -1.053467 |
| 34            | 1             | 0           | -0.510956               | 4.169340  | -1.096262 |

|    |    |   |           |           |           |
|----|----|---|-----------|-----------|-----------|
| 35 | 6  | 0 | -0.182822 | -2.214812 | 2.726684  |
| 36 | 1  | 0 | 0.782046  | -1.889116 | 3.111417  |
| 37 | 1  | 0 | -0.658901 | -2.938749 | 3.393305  |
| 38 | 1  | 0 | -0.068649 | -2.627955 | 1.723830  |
| 39 | 6  | 0 | 4.340643  | 0.421737  | -0.580505 |
| 40 | 6  | 0 | 5.588098  | 1.065617  | -0.567227 |
| 41 | 6  | 0 | 5.701090  | 2.434036  | -0.805120 |
| 42 | 6  | 0 | 4.555941  | 3.193249  | -1.058381 |
| 43 | 6  | 0 | 3.305744  | 2.577655  | -1.075662 |
| 44 | 6  | 0 | 3.202898  | 1.207238  | -0.844898 |
| 45 | 6  | 0 | 4.225506  | -1.036660 | -0.349308 |
| 46 | 6  | 0 | 5.127611  | -1.934540 | -0.942295 |
| 47 | 6  | 0 | 5.037864  | -3.307840 | -0.724629 |
| 48 | 6  | 0 | 4.027990  | -3.816010 | 0.095494  |
| 49 | 6  | 0 | 3.118902  | -2.946334 | 0.695051  |
| 50 | 6  | 0 | 3.219531  | -1.573153 | 0.477908  |
| 51 | 1  | 0 | 6.475377  | 0.478585  | -0.346266 |
| 52 | 1  | 0 | 6.678321  | 2.908133  | -0.781917 |
| 53 | 1  | 0 | 4.635141  | 4.262067  | -1.237941 |
| 54 | 1  | 0 | 2.396409  | 3.136435  | -1.272345 |
| 55 | 1  | 0 | 5.897380  | -1.539388 | -1.599524 |
| 56 | 1  | 0 | 5.746439  | -3.978954 | -1.201907 |
| 57 | 1  | 0 | 3.945830  | -4.885829 | 0.267255  |
| 58 | 1  | 0 | 2.328604  | -3.309979 | 1.342950  |
| 59 | 8  | 0 | 1.966344  | 0.603437  | -0.961896 |
| 60 | 8  | 0 | 2.369573  | -0.734544 | 1.175016  |
| 61 | 15 | 0 | 1.165465  | 0.096318  | 0.404128  |
| 62 | 8  | 0 | 0.796758  | 1.264456  | 1.263034  |
| 63 | 8  | 0 | 0.121950  | -0.871902 | -0.114085 |
| 64 | 6  | 0 | -2.976072 | 2.463132  | 1.884002  |
| 65 | 1  | 0 | -4.054596 | 2.371414  | 2.009893  |

-----

**TS-Tt(S-en)**

B3LYP-D3/6-31g(d) in gas phase

SCF Done: E(RB3LYP) = -2023.698491 hartree

Sum of electronic and thermal Free Energies = -2023.250898 hartree

The number of imaginary frequency = 1

Imaginary frequency = -375.61

-----

| Center Number | Atomic Number | Atomic Type | Coordinates (Angstroms) |           |           |
|---------------|---------------|-------------|-------------------------|-----------|-----------|
|               |               |             | X                       | Y         | Z         |
| 1             | 6             | 0           | -5.459465               | -0.408965 | -1.393917 |
| 2             | 1             | 0           | -5.079391               | -1.415501 | -1.544195 |
| 3             | 1             | 0           | -6.256990               | -0.137625 | -2.081640 |
| 4             | 6             | 0           | -5.492953               | 0.122788  | -0.101865 |
| 5             | 1             | 0           | -6.160648               | 0.961354  | 0.087555  |
| 6             | 6             | 0           | -3.588127               | -1.153945 | 0.782694  |
| 7             | 1             | 0           | -3.609237               | -1.908828 | 0.008144  |
| 8             | 1             | 0           | -2.362504               | -0.548906 | 2.321769  |
| 9             | 7             | 0           | -2.558438               | -1.288157 | 1.657423  |
| 10            | 6             | 0           | -1.612626               | -2.334560 | 1.707645  |
| 11            | 8             | 0           | -2.009903               | -3.363450 | 0.965361  |
| 12            | 8             | 0           | -0.635714               | -2.252957 | 2.417429  |
| 13            | 1             | 0           | -0.644381               | -0.184820 | -0.091764 |

|    |    |   |           |           |           |
|----|----|---|-----------|-----------|-----------|
| 14 | 6  | 0 | 0.801542  | 3.169173  | 2.997661  |
| 15 | 6  | 0 | -0.293555 | 3.654851  | 2.308522  |
| 16 | 6  | 0 | -0.948107 | 2.849105  | 1.350653  |
| 17 | 6  | 0 | -0.449372 | 1.542587  | 1.101436  |
| 18 | 6  | 0 | 0.648683  | 1.039102  | 1.828095  |
| 19 | 6  | 0 | 1.262233  | 1.855522  | 2.759440  |
| 20 | 1  | 0 | -2.504375 | 4.256847  | 0.795002  |
| 21 | 1  | 0 | 1.304353  | 3.792965  | 3.730659  |
| 22 | 1  | 0 | -0.667416 | 4.658673  | 2.494119  |
| 23 | 6  | 0 | -2.098678 | 3.264246  | 0.614198  |
| 24 | 1  | 0 | 0.991742  | 0.027810  | 1.640344  |
| 25 | 1  | 0 | 2.115801  | 1.475899  | 3.313163  |
| 26 | 6  | 0 | -2.146161 | 1.139250  | -0.568075 |
| 27 | 6  | 0 | -2.687135 | 2.439885  | -0.301360 |
| 28 | 1  | 0 | -3.560572 | 2.766127  | -0.851417 |
| 29 | 7  | 0 | -1.060619 | 0.764214  | 0.151024  |
| 30 | 6  | 0 | -2.658361 | 0.227645  | -1.536459 |
| 31 | 1  | 0 | -2.089096 | -0.686079 | -1.676652 |
| 32 | 6  | 0 | -3.811745 | 0.451738  | -2.295824 |
| 33 | 1  | 0 | -4.218205 | 1.454855  | -2.383515 |
| 34 | 1  | 0 | -3.927002 | -0.137059 | -3.201973 |
| 35 | 6  | 0 | -1.057344 | -4.445390 | 0.814678  |
| 36 | 1  | 0 | -1.645749 | -5.288252 | 0.450997  |
| 37 | 1  | 0 | -0.292446 | -4.162902 | 0.089144  |
| 38 | 1  | 0 | -0.603420 | -4.676078 | 1.780583  |
| 39 | 6  | 0 | 3.507460  | 0.323469  | -0.460925 |
| 40 | 6  | 0 | 4.810395  | 0.843164  | -0.404529 |
| 41 | 6  | 0 | 5.830150  | 0.172925  | 0.267971  |
| 42 | 6  | 0 | 5.563288  | -1.046262 | 0.896525  |
| 43 | 6  | 0 | 4.277521  | -1.582317 | 0.857581  |
| 44 | 6  | 0 | 3.260602  | -0.902234 | 0.188308  |
| 45 | 6  | 0 | 2.430449  | 1.043801  | -1.176973 |
| 46 | 6  | 0 | 2.267903  | 2.432141  | -1.044766 |
| 47 | 6  | 0 | 1.263199  | 3.113789  | -1.728875 |
| 48 | 6  | 0 | 0.400805  | 2.413380  | -2.576605 |
| 49 | 6  | 0 | 0.541183  | 1.034748  | -2.724515 |
| 50 | 6  | 0 | 1.539879  | 0.356252  | -2.025344 |
| 51 | 1  | 0 | 5.020796  | 1.777790  | -0.917593 |
| 52 | 1  | 0 | 6.831921  | 0.592894  | 0.289028  |
| 53 | 1  | 0 | 6.354579  | -1.580054 | 1.415857  |
| 54 | 1  | 0 | 4.032609  | -2.521063 | 1.343118  |
| 55 | 1  | 0 | 2.924462  | 2.970361  | -0.366919 |
| 56 | 1  | 0 | 1.149181  | 4.185829  | -1.594513 |
| 57 | 1  | 0 | -0.388043 | 2.935775  | -3.111102 |
| 58 | 1  | 0 | -0.120443 | 0.459116  | -3.362561 |
| 59 | 8  | 0 | 1.976294  | -1.387383 | 0.287919  |
| 60 | 8  | 0 | 1.672426  | -1.003567 | -2.208129 |
| 61 | 15 | 0 | 1.114955  | -2.010248 | -1.003923 |
| 62 | 8  | 0 | 1.484998  | -3.409023 | -1.324071 |
| 63 | 8  | 0 | -0.317545 | -1.618134 | -0.668861 |
| 64 | 6  | 0 | -4.567621 | -0.184227 | 0.908818  |
| 65 | 1  | 0 | -4.555167 | 0.438349  | 1.801744  |

-----

**TS-Tt(R-ex)**

B3LYP-D3/6-31g(d) in gas phase

SCF Done: E(RB3LYP) = -2023.710855 hartree



Sum of electronic and thermal Free Energies = -2023.262974 hartree  
 The number of imaginary frequency = 1  
 Imaginary frequency = -352.13

| Center Number | Atomic Number | Atomic Type | Coordinates (Angstroms) |           |           |
|---------------|---------------|-------------|-------------------------|-----------|-----------|
|               |               |             | X                       | Y         | Z         |
| 1             | 6             | 0           | 4.461138                | -3.460804 | -1.069262 |
| 2             | 1             | 0           | 4.963483                | -2.497996 | -1.032019 |
| 3             | 1             | 0           | 5.127732                | -4.314670 | -0.978229 |
| 4             | 6             | 0           | 3.285187                | -3.604225 | -1.802713 |
| 5             | 1             | 0           | 2.960943                | -4.617128 | -2.035832 |
| 6             | 6             | 0           | 2.621864                | -1.247839 | -1.802918 |
| 7             | 1             | 0           | 3.614913                | -0.902787 | -1.543255 |
| 8             | 1             | 0           | 0.679367                | -0.581836 | -2.004407 |
| 9             | 7             | 0           | 1.680227                | -0.276902 | -1.913748 |
| 10            | 6             | 0           | 1.887056                | 1.081654  | -1.759302 |
| 11            | 8             | 0           | 3.183401                | 1.376712  | -1.507512 |
| 12            | 8             | 0           | 1.000236                | 1.907293  | -1.840733 |
| 13            | 1             | 0           | 0.960385                | -0.547683 | 1.082989  |
| 14            | 6             | 0           | 2.024853                | 4.000220  | 2.070933  |
| 15            | 6             | 0           | 3.187692                | 3.253664  | 2.140603  |
| 16            | 6             | 0           | 3.163953                | 1.869832  | 1.866765  |
| 17            | 6             | 0           | 1.924403                | 1.257857  | 1.539318  |
| 18            | 6             | 0           | 0.743541                | 2.022625  | 1.456214  |
| 19            | 6             | 0           | 0.807183                | 3.379328  | 1.720469  |
| 20            | 1             | 0           | 5.287877                | 1.487848  | 2.114109  |
| 21            | 1             | 0           | 2.048026                | 5.065910  | 2.277942  |
| 22            | 1             | 0           | 4.134585                | 3.722220  | 2.397196  |
| 23            | 6             | 0           | 4.327430                | 1.038316  | 1.873278  |
| 24            | 1             | 0           | -0.186281               | 1.544300  | 1.164908  |
| 25            | 1             | 0           | -0.098181               | 3.974484  | 1.647973  |
| 26            | 6             | 0           | 2.984079                | -0.901806 | 1.281280  |
| 27            | 6             | 0           | 4.247825                | -0.291241 | 1.581848  |
| 28            | 1             | 0           | 5.136693                | -0.910655 | 1.588236  |
| 29            | 7             | 0           | 1.893775                | -0.090398 | 1.279336  |
| 30            | 6             | 0           | 2.782321                | -2.278068 | 1.007705  |
| 31            | 1             | 0           | 1.752059                | -2.569624 | 0.828907  |
| 32            | 6             | 0           | 3.777531                | -3.252320 | 0.932891  |
| 33            | 1             | 0           | 4.775564                | -3.055024 | 1.316541  |
| 34            | 1             | 0           | 3.469388                | -4.287550 | 1.029116  |
| 35            | 6             | 0           | 3.467050                | 2.784165  | -1.415355 |
| 36            | 1             | 0           | 2.822139                | 3.259315  | -0.674799 |
| 37            | 1             | 0           | 4.512230                | 2.846417  | -1.111002 |
| 38            | 1             | 0           | 3.320700                | 3.262502  | -2.388017 |
| 39            | 6             | 0           | -4.069135               | 0.597468  | -0.557996 |
| 40            | 6             | 0           | -5.097007               | 1.220800  | -1.283782 |
| 41            | 6             | 0           | -4.813708               | 2.133490  | -2.298184 |
| 42            | 6             | 0           | -3.486653               | 2.439161  | -2.613208 |
| 43            | 6             | 0           | -2.445160               | 1.834605  | -1.910569 |
| 44            | 6             | 0           | -2.745182               | 0.930525  | -0.894856 |
| 45            | 6             | 0           | -4.362187               | -0.351932 | 0.540960  |
| 46            | 6             | 0           | -5.383409               | -0.085918 | 1.467870  |
| 47            | 6             | 0           | -5.673590               | -0.967750 | 2.506788  |
| 48            | 6             | 0           | -4.934041               | -2.144512 | 2.646221  |
| 49            | 6             | 0           | -3.914410               | -2.433332 | 1.741215  |

|    |    |   |           |           |           |
|----|----|---|-----------|-----------|-----------|
| 50 | 6  | 0 | -3.637628 | -1.549916 | 0.699643  |
| 51 | 1  | 0 | -6.128007 | 0.964299  | -1.055720 |
| 52 | 1  | 0 | -5.627450 | 2.596022  | -2.850113 |
| 53 | 1  | 0 | -3.261543 | 3.144056  | -3.409112 |
| 54 | 1  | 0 | -1.401329 | 2.041348  | -2.121942 |
| 55 | 1  | 0 | -5.940336 | 0.842370  | 1.373877  |
| 56 | 1  | 0 | -6.466240 | -0.731483 | 3.211323  |
| 57 | 1  | 0 | -5.147923 | -2.835274 | 3.457286  |
| 58 | 1  | 0 | -3.324724 | -3.341008 | 1.814380  |
| 59 | 8  | 0 | -1.704202 | 0.408475  | -0.143684 |
| 60 | 8  | 0 | -2.695616 | -1.931193 | -0.240084 |
| 61 | 15 | 0 | -1.246541 | -1.169886 | -0.361915 |
| 62 | 8  | 0 | -0.753096 | -1.401343 | -1.765380 |
| 63 | 8  | 0 | -0.358902 | -1.458732 | 0.826975  |
| 64 | 6  | 0 | 2.361435  | -2.576491 | -2.072607 |
| 65 | 1  | 0 | 1.366861  | -2.834007 | -2.426862 |

**TS-Tt(S-ex)**

B3LYP-D3/6-31g(d) in gas phase  
 SCF Done: E(RB3LYP) = -2023.709229 hartree  
 Sum of electronic and thermal Free Energies = -2023.261170 hartree  
 The number of imaginary frequency = 1  
 Imaginary frequency = -342.56

| Center Number | Atomic Number | Atomic Type | Coordinates (Angstroms) |           |           |
|---------------|---------------|-------------|-------------------------|-----------|-----------|
|               |               |             | X                       | Y         | Z         |
| 1             | 6             | 0           | 1.211113                | 4.355611  | 0.926688  |
| 2             | 1             | 0           | 2.250346                | 4.043911  | 0.868485  |
| 3             | 1             | 0           | 1.044281                | 5.248857  | 1.523226  |
| 4             | 6             | 0           | 0.339260                | 4.076797  | -0.122024 |
| 5             | 1             | 0           | -0.601049               | 4.625920  | -0.146679 |
| 6             | 6             | 0           | 1.584810                | 2.208540  | -1.099522 |
| 7             | 1             | 0           | 2.508863                | 2.488961  | -0.609354 |
| 8             | 1             | 0           | 0.739024                | 0.672215  | -2.175761 |
| 9             | 7             | 0           | 1.643722                | 1.069637  | -1.834292 |
| 10            | 6             | 0           | 2.771832                | 0.292896  | -2.046140 |
| 11            | 8             | 0           | 3.873771                | 0.834675  | -1.471599 |
| 12            | 8             | 0           | 2.759838                | -0.743509 | -2.673502 |
| 13            | 1             | 0           | 1.062573                | -0.687090 | 0.526980  |
| 14            | 6             | 0           | 5.162381                | -3.059657 | 0.533378  |
| 15            | 6             | 0           | 5.341503                | -1.896822 | 1.261306  |
| 16            | 6             | 0           | 4.277961                | -0.982634 | 1.416298  |
| 17            | 6             | 0           | 3.023134                | -1.287663 | 0.825814  |
| 18            | 6             | 0           | 2.846733                | -2.465553 | 0.071701  |
| 19            | 6             | 0           | 3.913947                | -3.335222 | -0.064932 |
| 20            | 1             | 0           | 5.340959                | 0.518262  | 2.572181  |
| 21            | 1             | 0           | 5.984020                | -3.759485 | 0.414110  |
| 22            | 1             | 0           | 6.301913                | -1.668402 | 1.716558  |
| 23            | 6             | 0           | 4.387457                | 0.257498  | 2.119129  |
| 24            | 1             | 0           | 1.884449                | -2.651296 | -0.394087 |
| 25            | 1             | 0           | 3.788098                | -4.241436 | -0.649791 |
| 26            | 6             | 0           | 2.054066                | 0.768152  | 1.648492  |
| 27            | 6             | 0           | 3.324196                | 1.105039  | 2.226073  |
| 28            | 1             | 0           | 3.419319                | 2.041059  | 2.763140  |

|    |    |   |           |           |           |    |   |   |           |           |           |
|----|----|---|-----------|-----------|-----------|----|---|---|-----------|-----------|-----------|
| 29 | 7  | 0 | 1.978746  | -0.409421 | 0.977794  | 8  | 1 | 0 | 4.838920  | -0.635909 | -1.321333 |
| 30 | 6  | 0 | 0.881019  | 1.560323  | 1.739460  | 9  | 7 | 0 | 3.834058  | -0.660515 | -1.424086 |
| 31 | 1  | 0 | -0.013333 | 1.149153  | 1.283951  | 10 | 6 | 0 | 3.258723  | 0.537351  | -1.825379 |
| 32 | 6  | 0 | 0.787573  | 2.810151  | 2.347967  | 11 | 8 | 0 | 4.245437  | 1.442894  | -2.027993 |
| 33 | 1  | 0 | 1.563955  | 3.161348  | 3.022718  | 12 | 8 | 0 | 2.075940  | 0.749295  | -1.972927 |
| 34 | 1  | 0 | -0.204948 | 3.172244  | 2.591623  | 13 | 1 | 0 | 0.601931  | -0.592301 | 1.708164  |
| 35 | 6  | 0 | 5.092222  | 0.116472  | -1.732578 | 14 | 6 | 0 | 0.797439  | 3.991989  | 0.545989  |
| 36 | 1  | 0 | 5.854363  | 0.616963  | -1.134555 | 15 | 6 | 0 | 2.091591  | 3.546344  | 0.736500  |
| 37 | 1  | 0 | 4.995830  | -0.928700 | -1.435338 | 16 | 6 | 0 | 2.339588  | 2.199432  | 1.081632  |
| 38 | 1  | 0 | 5.341326  | 0.170626  | -2.796264 | 17 | 6 | 0 | 1.239678  | 1.313651  | 1.239680  |
| 39 | 6  | 0 | -4.365511 | 0.190770  | 0.137140  | 18 | 6 | 0 | -0.077551 | 1.779222  | 1.057052  |
| 40 | 6  | 0 | -5.607365 | 0.841029  | 0.055226  | 19 | 6 | 0 | -0.284587 | 3.100468  | 0.708315  |
| 41 | 6  | 0 | -5.697203 | 2.225863  | -0.071855 | 20 | 1 | 0 | 4.506063  | 2.324486  | 1.179578  |
| 42 | 6  | 0 | -4.533340 | 2.996727  | -0.122411 | 21 | 1 | 0 | 0.610212  | 5.027570  | 0.277666  |
| 43 | 6  | 0 | -3.288222 | 2.375471  | -0.047138 | 22 | 1 | 0 | 2.936337  | 4.222853  | 0.628900  |
| 44 | 6  | 0 | -3.207745 | 0.989946  | 0.079797  | 23 | 6 | 0 | 3.646976  | 1.667015  | 1.287686  |
| 45 | 6  | 0 | -4.277881 | -1.277346 | 0.311912  | 24 | 1 | 0 | -0.904626 | 1.094541  | 1.183941  |
| 46 | 6  | 0 | -5.132702 | -1.951337 | 1.199440  | 25 | 1 | 0 | -1.302943 | 3.445698  | 0.561755  |
| 47 | 6  | 0 | -5.061585 | -3.332315 | 1.369082  | 26 | 6 | 0 | 2.703151  | -0.538680 | 1.736562  |
| 48 | 6  | 0 | -4.119429 | -4.073804 | 0.651757  | 27 | 6 | 0 | 3.821877  | 0.352347  | 1.603546  |
| 49 | 6  | 0 | -3.258704 | -3.429686 | -0.234916 | 28 | 1 | 0 | 4.815581  | -0.056449 | 1.754930  |
| 50 | 6  | 0 | -3.343975 | -2.049386 | -0.404151 | 29 | 7 | 0 | 1.467181  | -0.000546 | 1.580218  |
| 51 | 1  | 0 | -6.511825 | 0.239344  | 0.075072  | 30 | 6 | 0 | 2.921687  | -1.908121 | 2.036285  |
| 52 | 1  | 0 | -6.671999 | 2.700452  | -0.140461 | 31 | 1 | 0 | 3.966838  | -2.180772 | 2.162522  |
| 53 | 1  | 0 | -4.594174 | 4.076921  | -0.224558 | 32 | 6 | 0 | 1.952277  | -2.907808 | 2.189940  |
| 54 | 1  | 0 | -2.363474 | 2.941698  | -0.075060 | 33 | 1 | 0 | 0.904891  | -2.641199 | 2.303462  |
| 55 | 1  | 0 | -5.846953 | -1.370527 | 1.776676  | 34 | 1 | 0 | 2.253224  | -3.792397 | 2.745865  |
| 56 | 1  | 0 | -5.731574 | -3.826472 | 2.067141  | 35 | 6 | 0 | -3.153210 | 0.115941  | -1.385213 |
| 57 | 1  | 0 | -4.052755 | -5.150361 | 0.782993  | 36 | 6 | 0 | -3.903109 | 0.345217  | -2.549241 |
| 58 | 1  | 0 | -2.519157 | -3.973237 | -0.813161 | 37 | 6 | 0 | -3.587613 | -0.284887 | -3.751349 |
| 59 | 8  | 0 | -1.963278 | 0.416273  | 0.248638  | 38 | 6 | 0 | -2.507416 | -1.168793 | -3.808964 |
| 60 | 8  | 0 | -2.549775 | -1.457467 | -1.369974 | 39 | 6 | 0 | -1.747961 | -1.413603 | -2.666485 |
| 61 | 15 | 0 | -1.274519 | -0.513480 | -0.951182 | 40 | 6 | 0 | -2.064393 | -0.774342 | -1.468244 |
| 62 | 8  | 0 | -0.933364 | 0.326201  | -2.149770 | 41 | 6 | 0 | -3.473846 | 0.806695  | -0.115888 |
| 63 | 8  | 0 | -0.210865 | -1.308067 | -0.231693 | 42 | 6 | 0 | -3.795890 | 2.173902  | -0.093885 |
| 64 | 6  | 0 | 0.457624  | 3.003311  | -1.026198 | 43 | 6 | 0 | -4.083376 | 2.833968  | 1.100137  |
| 65 | 1  | 0 | -0.397203 | 2.725904  | -1.636142 | 44 | 6 | 0 | -4.044457 | 2.132759  | 2.308834  |

-----

*s-cis\_Cc(R-en)*

B3LYP-D3/6-31g(d) in gas phase

SCF Done: E(RB3LYP) = -2023.696488 hartree

Sum of electronic and thermal Free Energies = -2023.248889 hartree

The number of imaginary frequency = 1

Imaginary frequency = -338.38

-----

| Center Number | Atomic Number | Atomic Type | Coordinates (Angstroms) |   |   |
|---------------|---------------|-------------|-------------------------|---|---|
|               |               |             | X                       | Y | Z |

|   |   |   |          |           |           |
|---|---|---|----------|-----------|-----------|
| 1 | 6 | 0 | 1.796413 | -4.020231 | 0.455082  |
| 2 | 1 | 0 | 2.860947 | -4.235060 | 0.403591  |
| 3 | 1 | 0 | 1.183969 | -4.840656 | 0.819225  |
| 4 | 6 | 0 | 1.200093 | -3.133278 | -0.438083 |
| 5 | 1 | 0 | 0.118752 | -3.190869 | -0.515511 |
| 6 | 6 | 0 | 3.170810 | -1.790056 | -0.984187 |
| 7 | 1 | 0 | 3.848012 | -2.531954 | -0.577304 |

|    |    |   |           |           |           |
|----|----|---|-----------|-----------|-----------|
| 45 | 6  | 0 | -3.734217 | 0.774133  | 2.313502  |
| 46 | 6  | 0 | -3.464444 | 0.116287  | 1.112988  |
| 47 | 1  | 0 | -4.758072 | 1.013920  | -2.495490 |
| 48 | 1  | 0 | -4.189603 | -0.096349 | -4.635865 |
| 49 | 1  | 0 | -2.258335 | -1.670614 | -4.740067 |
| 50 | 1  | 0 | -0.903088 | -2.094245 | -2.683420 |
| 51 | 1  | 0 | -3.796133 | 2.722842  | -1.031871 |
| 52 | 1  | 0 | -4.326831 | 3.893039  | 1.088486  |
| 53 | 1  | 0 | -4.255082 | 2.641874  | 3.245334  |
| 54 | 1  | 0 | -3.698703 | 0.197968  | 3.231825  |
| 55 | 8  | 0 | -1.234289 | -0.950234 | -0.383340 |
| 56 | 8  | 0 | -3.254555 | -1.245130 | 1.136458  |
| 57 | 15 | 0 | -1.718826 | -1.844220 | 0.956401  |
| 58 | 8  | 0 | -1.806726 | -3.294142 | 0.639450  |
| 59 | 8  | 0 | -0.823255 | -1.296402 | 2.051847  |
| 60 | 6  | 0 | 3.783148  | 2.722852  | -2.499523 |
| 61 | 1  | 0 | 3.060968  | 3.148864  | -1.799218 |
| 62 | 1  | 0 | 4.676835  | 3.344080  | -2.566601 |
| 63 | 1  | 0 | 3.312997  | 2.619321  | -3.481394 |
| 64 | 6  | 0 | 1.825835  | -2.035517 | -1.074543 |

65 1 0 1.186949 -1.303334 -1.550558  
 -----  
*s-cis\_TS-Cc(S-en)*  
 B3LYP-D3/6-31g(d) in gas phase  
 SCF Done: E(RB3LYP) = -2023.689022 hartree  
 Sum of electronic and thermal Free Energies = -2023.243890  
 hartree  
 The number of imaginary frequency = 1  
 Imaginary frequency = -324.72

| Center Number | Atomic Number | Atomic Type | Coordinates (Angstroms) |           |           |
|---------------|---------------|-------------|-------------------------|-----------|-----------|
|               |               |             | X                       | Y         | Z         |
| 1             | 6             | 0           | -1.192758               | -3.818293 | 1.120381  |
| 2             | 1             | 0           | -2.106330               | -4.291433 | 1.472218  |
| 3             | 1             | 0           | -0.281670               | -4.332383 | 1.415428  |
| 4             | 6             | 0           | -1.174509               | -3.094712 | -0.068103 |
| 5             | 1             | 0           | -0.211543               | -2.861424 | -0.519115 |
| 6             | 6             | 0           | -3.552973               | -2.512246 | -0.152969 |
| 7             | 1             | 0           | -3.806103               | -3.233850 | 0.615149  |
| 8             | 1             | 0           | -5.537338               | -1.971406 | -0.116091 |
| 9             | 7             | 0           | -4.648354               | -1.768670 | -0.551607 |
| 10            | 6             | 0           | -4.638095               | -0.642353 | -1.361082 |
| 11            | 8             | 0           | -5.887038               | -0.117302 | -1.385774 |
| 12            | 8             | 0           | -3.680581               | -0.191702 | -1.949748 |
| 13            | 1             | 0           | -0.790573               | -0.122615 | 1.092231  |
| 14            | 6             | 0           | -2.594417               | 3.721465  | -1.004466 |
| 15            | 6             | 0           | -3.585073               | 3.157680  | -0.223097 |
| 16            | 6             | 0           | -3.335218               | 1.974934  | 0.506783  |
| 17            | 6             | 0           | -2.045254               | 1.383655  | 0.441308  |
| 18            | 6             | 0           | -1.038509               | 1.965250  | -0.355626 |
| 19            | 6             | 0           | -1.321728               | 3.115278  | -1.068714 |
| 20            | 1             | 0           | -5.311232               | 1.755336  | 1.383643  |
| 21            | 1             | 0           | -2.791749               | 4.628314  | -1.568101 |
| 22            | 1             | 0           | -4.569706               | 3.614806  | -0.157084 |
| 23            | 6             | 0           | -4.316363               | 1.322722  | 1.312339  |
| 24            | 1             | 0           | -0.060541               | 1.504347  | -0.405729 |
| 25            | 1             | 0           | -0.545963               | 3.553336  | -1.689889 |
| 26            | 6             | 0           | -2.714812               | -0.427496 | 1.884612  |
| 27            | 6             | 0           | -4.020452               | 0.165294  | 1.969146  |
| 28            | 1             | 0           | -4.768060               | -0.339765 | 2.571934  |
| 29            | 7             | 0           | -1.783452               | 0.237160  | 1.154488  |
| 30            | 6             | 0           | -2.440537               | -1.646132 | 2.556356  |
| 31            | 1             | 0           | -3.282742               | -2.064074 | 3.102417  |
| 32            | 6             | 0           | -1.220833               | -2.332181 | 2.578985  |
| 33            | 1             | 0           | -0.306505               | -1.833386 | 2.267692  |
| 34            | 1             | 0           | -1.094207               | -3.070593 | 3.366828  |
| 35            | 6             | 0           | 4.433513                | 1.177317  | 0.177679  |
| 36            | 6             | 0           | 5.290162                | 2.065414  | 0.847507  |
| 37            | 6             | 0           | 4.825964                | 3.269437  | 1.372897  |
| 38            | 6             | 0           | 3.477423                | 3.607783  | 1.241662  |
| 39            | 6             | 0           | 2.605453                | 2.743414  | 0.582158  |
| 40            | 6             | 0           | 3.078450                | 1.543111  | 0.051215  |
| 41            | 6             | 0           | 4.944887                | -0.091905 | -0.387263 |
| 42            | 6             | 0           | 6.168930                | -0.143430 | -1.073124 |
| 43            | 6             | 0           | 6.660287                | -1.340045 | -1.590864 |

|    |    |   |           |           |           |
|----|----|---|-----------|-----------|-----------|
| 44 | 6  | 0 | 5.925793  | -2.518512 | -1.436018 |
| 45 | 6  | 0 | 4.707487  | -2.493683 | -0.759824 |
| 46 | 6  | 0 | 4.228186  | -1.293900 | -0.237172 |
| 47 | 1  | 0 | 6.333444  | 1.787288  | 0.969878  |
| 48 | 1  | 0 | 5.510941  | 3.934025  | 1.892155  |
| 49 | 1  | 0 | 3.102457  | 4.540795  | 1.654072  |
| 50 | 1  | 0 | 1.554642  | 2.986113  | 0.465745  |
| 51 | 1  | 0 | 6.726063  | 0.778665  | -1.215338 |
| 52 | 1  | 0 | 7.606905  | -1.350535 | -2.124127 |
| 53 | 1  | 0 | 6.297544  | -3.454251 | -1.844807 |
| 54 | 1  | 0 | 4.111653  | -3.389562 | -0.621206 |
| 55 | 8  | 0 | 2.212941  | 0.763761  | -0.690807 |
| 56 | 8  | 0 | 3.069985  | -1.312482 | 0.515447  |
| 57 | 15 | 0 | 1.667684  | -0.706778 | -0.122609 |
| 58 | 8  | 0 | 0.785827  | -0.455688 | 1.086327  |
| 59 | 8  | 0 | 1.178561  | -1.485018 | -1.296641 |
| 60 | 6  | 0 | -6.025778 | 1.034840  | -2.237912 |
| 61 | 1  | 0 | -5.834956 | 0.763147  | -3.279860 |
| 62 | 1  | 0 | -7.057502 | 1.364182  | -2.110955 |
| 63 | 1  | 0 | -5.324367 | 1.817473  | -1.939218 |
| 64 | 6  | 0 | -2.282232 | -2.433929 | -0.656080 |
| 65 | 1  | 0 | -2.074705 | -1.755523 | -1.473621 |

-----  
*s-cis\_TS-Cc(R-ex)*  
 B3LYP-D3/6-31g(d) in gas phase  
 SCF Done: E(RB3LYP) = -2023.700708 hartree  
 Sum of electronic and thermal Free Energies = -2023.253140  
 hartree  
 The number of imaginary frequency = 1  
 Imaginary frequency = -375.38

| Center Number | Atomic Number | Atomic Type | Coordinates (Angstroms) |           |           |
|---------------|---------------|-------------|-------------------------|-----------|-----------|
|               |               |             | X                       | Y         | Z         |
| 1             | 6             | 0           | 0.127231                | -2.446875 | 2.746933  |
| 2             | 1             | 0           | 0.719259                | -1.815813 | 2.090299  |
| 3             | 1             | 0           | 0.668087                | -2.769539 | 3.633402  |
| 4             | 6             | 0           | -0.793355               | -3.353551 | 2.196234  |
| 5             | 1             | 0           | -1.065630               | -4.225198 | 2.790000  |
| 6             | 6             | 0           | -1.325260               | -1.973644 | 0.302480  |
| 7             | 1             | 0           | -0.440051               | -1.398002 | 0.520925  |
| 8             | 1             | 0           | -1.483359               | -0.616625 | -1.153220 |
| 9             | 7             | 0           | -1.966066               | -1.441119 | -0.766445 |
| 10            | 6             | 0           | -3.223643               | -1.795264 | -1.223422 |
| 11            | 8             | 0           | -3.577070               | -0.960529 | -2.222609 |
| 12            | 8             | 0           | -3.905920               | -2.702057 | -0.789313 |
| 13            | 1             | 0           | -0.941641               | 1.289489  | 1.557410  |
| 14            | 6             | 0           | -3.405478               | 3.866403  | -1.542490 |
| 15            | 6             | 0           | -4.222940               | 2.855002  | -1.073183 |
| 16            | 6             | 0           | -3.755516               | 1.955607  | -0.092384 |
| 17            | 6             | 0           | -2.434042               | 2.100227  | 0.401777  |
| 18            | 6             | 0           | -1.605915               | 3.132920  | -0.078095 |
| 19            | 6             | 0           | -2.095298               | 3.999434  | -1.038754 |
| 20            | 1             | 0           | -5.546054               | 0.732051  | 0.055152  |
| 21            | 1             | 0           | -3.767649               | 4.555860  | -2.299094 |
| 22            | 1             | 0           | -5.235716               | 2.737601  | -1.450779 |

|    |    |   |           |           |           |    |   |   |           |           |           |
|----|----|---|-----------|-----------|-----------|----|---|---|-----------|-----------|-----------|
| 23 | 6  | 0 | -4.536153 | 0.878201  | 0.430810  | 2  | 1 | 0 | -2.106330 | -4.291433 | 1.472218  |
| 24 | 1  | 0 | -0.596017 | 3.220445  | 0.305482  | 3  | 1 | 0 | -0.281670 | -4.332383 | 1.415428  |
| 25 | 1  | 0 | -1.453711 | 4.791205  | -1.414362 | 4  | 6 | 0 | -1.174509 | -3.094712 | -0.068103 |
| 26 | 6  | 0 | -2.686803 | 0.189423  | 1.867512  | 5  | 1 | 0 | -0.211543 | -2.861424 | -0.519115 |
| 27 | 6  | 0 | -4.030764 | 0.039063  | 1.376614  | 6  | 6 | 0 | -3.552973 | -2.512246 | -0.152969 |
| 28 | 1  | 0 | -4.615477 | -0.793636 | 1.750559  | 7  | 1 | 0 | -3.806103 | -3.233850 | 0.615149  |
| 29 | 7  | 0 | -1.965965 | 1.221781  | 1.356891  | 8  | 1 | 0 | -5.537338 | -1.971406 | -0.116091 |
| 30 | 6  | 0 | -2.200970 | -0.712177 | 2.839214  | 9  | 7 | 0 | -4.648354 | -1.768670 | -0.551607 |
| 31 | 1  | 0 | -2.943617 | -1.443039 | 3.147776  | 10 | 6 | 0 | -4.638095 | -0.642353 | -1.361082 |
| 32 | 6  | 0 | -0.935456 | -0.814386 | 3.442501  | 11 | 8 | 0 | -5.887038 | -0.117302 | -1.385774 |
| 33 | 1  | 0 | -0.182852 | -0.057766 | 3.228709  | 12 | 8 | 0 | -3.680581 | -0.191702 | -1.949748 |
| 34 | 1  | 0 | -0.920874 | -1.189110 | 4.461639  | 13 | 1 | 0 | -0.790573 | -0.122615 | 1.092231  |
| 35 | 6  | 0 | 4.420373  | 0.438272  | -0.289916 | 14 | 6 | 0 | -2.594417 | 3.721465  | -1.004466 |
| 36 | 6  | 0 | 5.748330  | 0.567119  | 0.148777  | 15 | 6 | 0 | -3.585073 | 3.157680  | -0.223097 |
| 37 | 6  | 0 | 6.229630  | 1.767025  | 0.668023  | 16 | 6 | 0 | -3.335218 | 1.974934  | 0.506783  |
| 38 | 6  | 0 | 5.380991  | 2.872230  | 0.767018  | 17 | 6 | 0 | -2.045254 | 1.383655  | 0.441308  |
| 39 | 6  | 0 | 4.058382  | 2.771246  | 0.339721  | 18 | 6 | 0 | -1.038509 | 1.965250  | -0.355626 |
| 40 | 6  | 0 | 3.589212  | 1.569583  | -0.186351 | 19 | 6 | 0 | -1.321728 | 3.115278  | -1.068714 |
| 41 | 6  | 0 | 3.923357  | -0.843223 | -0.842060 | 20 | 1 | 0 | -5.311232 | 1.755336  | 1.383643  |
| 42 | 6  | 0 | 4.701884  | -1.605855 | -1.727354 | 21 | 1 | 0 | -2.791749 | 4.628314  | -1.568101 |
| 43 | 6  | 0 | 4.253579  | -2.830371 | -2.218680 | 22 | 1 | 0 | -4.569706 | 3.614806  | -0.157084 |
| 44 | 6  | 0 | 3.004232  | -3.320982 | -1.831651 | 23 | 6 | 0 | -4.316363 | 1.322722  | 1.312339  |
| 45 | 6  | 0 | 2.209380  | -2.582432 | -0.956693 | 24 | 1 | 0 | -0.060541 | 1.504347  | -0.405729 |
| 46 | 6  | 0 | 2.667486  | -1.359006 | -0.471985 | 25 | 1 | 0 | -0.545963 | 3.553336  | -1.689889 |
| 47 | 1  | 0 | 6.399908  | -0.300795 | 0.096636  | 26 | 6 | 0 | -2.714812 | -0.427496 | 1.884612  |
| 48 | 1  | 0 | 7.260039  | 1.835434  | 1.005395  | 27 | 6 | 0 | -4.020452 | 0.165294  | 1.969146  |
| 49 | 1  | 0 | 5.745633  | 3.809703  | 1.177748  | 28 | 1 | 0 | -4.768060 | -0.339765 | 2.571934  |
| 50 | 1  | 0 | 3.373388  | 3.610556  | 0.396451  | 29 | 7 | 0 | -1.783452 | 0.237160  | 1.154488  |
| 51 | 1  | 0 | 5.665489  | -1.215119 | -2.042380 | 30 | 6 | 0 | -2.440537 | -1.646132 | 2.556356  |
| 52 | 1  | 0 | 4.874281  | -3.396056 | -2.907820 | 31 | 1 | 0 | -3.282742 | -2.064074 | 3.102417  |
| 53 | 1  | 0 | 2.646856  | -4.274343 | -2.210980 | 32 | 6 | 0 | -1.220833 | -2.332181 | 2.578985  |
| 54 | 1  | 0 | 1.239503  | -2.943502 | -0.629829 | 33 | 1 | 0 | -0.306505 | -1.833386 | 2.267692  |
| 55 | 8  | 0 | 2.304814  | 1.538031  | -0.702189 | 34 | 1 | 0 | -1.094207 | -3.070593 | 3.366828  |
| 56 | 8  | 0 | 1.900304  | -0.689497 | 0.465894  | 35 | 6 | 0 | 4.433513  | 1.177317  | 0.177679  |
| 57 | 15 | 0 | 1.101673  | 0.714792  | 0.055570  | 36 | 6 | 0 | 5.290162  | 2.065414  | 0.847507  |
| 58 | 8  | 0 | 0.738466  | 1.338376  | 1.384993  | 37 | 6 | 0 | 4.825964  | 3.269437  | 1.372897  |
| 59 | 8  | 0 | 0.037436  | 0.441613  | -0.965394 | 38 | 6 | 0 | 3.477423  | 3.607783  | 1.241662  |
| 60 | 6  | 0 | -4.890315 | -1.181779 | -2.754487 | 39 | 6 | 0 | 2.605453  | 2.743414  | 0.582158  |
| 61 | 1  | 0 | -5.646598 | -1.033568 | -1.977316 | 40 | 6 | 0 | 3.078450  | 1.543111  | 0.051215  |
| 62 | 1  | 0 | -5.007903 | -0.444941 | -3.549246 | 41 | 6 | 0 | 4.944887  | -0.091905 | -0.387263 |
| 63 | 1  | 0 | -4.982498 | -2.196792 | -3.150336 | 42 | 6 | 0 | 6.168930  | -0.143430 | -1.073124 |
| 64 | 6  | 0 | -1.566465 | -3.116303 | 1.041811  | 43 | 6 | 0 | 6.660287  | -1.340045 | -1.590864 |
| 65 | 1  | 0 | -2.382068 | -3.777960 | 0.778511  | 44 | 6 | 0 | 5.925793  | -2.518512 | -1.436018 |

-----

*s-cis\_TS-Cc(S-ex)*

B3LYP-D3/6-31g(d) in gas phase

SCF Done: E(RB3LYP) = -2023.700858 hartree

Sum of electronic and thermal Free Energies = -2023.254762 hartree

The number of imaginary frequency = 1

Imaginary frequency = -343.90

-----

| Center Number | Atomic Number | Atomic Type | Coordinates (Angstroms) |           |          |
|---------------|---------------|-------------|-------------------------|-----------|----------|
|               |               |             | X                       | Y         | Z        |
| 1             | 6             | 0           | -1.192758               | -3.818293 | 1.120381 |

|    |    |   |           |           |           |
|----|----|---|-----------|-----------|-----------|
| 2  | 1  | 0 | -2.106330 | -4.291433 | 1.472218  |
| 3  | 1  | 0 | -0.281670 | -4.332383 | 1.415428  |
| 4  | 6  | 0 | -1.174509 | -3.094712 | -0.068103 |
| 5  | 1  | 0 | -0.211543 | -2.861424 | -0.519115 |
| 6  | 6  | 0 | -3.552973 | -2.512246 | -0.152969 |
| 7  | 1  | 0 | -3.806103 | -3.233850 | 0.615149  |
| 8  | 1  | 0 | -5.537338 | -1.971406 | -0.116091 |
| 9  | 7  | 0 | -4.648354 | -1.768670 | -0.551607 |
| 10 | 6  | 0 | -4.638095 | -0.642353 | -1.361082 |
| 11 | 8  | 0 | -5.887038 | -0.117302 | -1.385774 |
| 12 | 8  | 0 | -3.680581 | -0.191702 | -1.949748 |
| 13 | 1  | 0 | -0.790573 | -0.122615 | 1.092231  |
| 14 | 6  | 0 | -2.594417 | 3.721465  | -1.004466 |
| 15 | 6  | 0 | -3.585073 | 3.157680  | -0.223097 |
| 16 | 6  | 0 | -3.335218 | 1.974934  | 0.506783  |
| 17 | 6  | 0 | -2.045254 | 1.383655  | 0.441308  |
| 18 | 6  | 0 | -1.038509 | 1.965250  | -0.355626 |
| 19 | 6  | 0 | -1.321728 | 3.115278  | -1.068714 |
| 20 | 1  | 0 | -5.311232 | 1.755336  | 1.383643  |
| 21 | 1  | 0 | -2.791749 | 4.628314  | -1.568101 |
| 22 | 1  | 0 | -4.569706 | 3.614806  | -0.157084 |
| 23 | 6  | 0 | -4.316363 | 1.322722  | 1.312339  |
| 24 | 1  | 0 | -0.060541 | 1.504347  | -0.405729 |
| 25 | 1  | 0 | -0.545963 | 3.553336  | -1.689889 |
| 26 | 6  | 0 | -2.714812 | -0.427496 | 1.884612  |
| 27 | 6  | 0 | -4.020452 | 0.165294  | 1.969146  |
| 28 | 1  | 0 | -4.768060 | -0.339765 | 2.571934  |
| 29 | 7  | 0 | -1.783452 | 0.237160  | 1.154488  |
| 30 | 6  | 0 | -2.440537 | -1.646132 | 2.556356  |
| 31 | 1  | 0 | -3.282742 | -2.064074 | 3.102417  |
| 32 | 6  | 0 | -1.220833 | -2.332181 | 2.578985  |
| 33 | 1  | 0 | -0.306505 | -1.833386 | 2.267692  |
| 34 | 1  | 0 | -1.094207 | -3.070593 | 3.366828  |
| 35 | 6  | 0 | 4.433513  | 1.177317  | 0.177679  |
| 36 | 6  | 0 | 5.290162  | 2.065414  | 0.847507  |
| 37 | 6  | 0 | 4.825964  | 3.269437  | 1.372897  |
| 38 | 6  | 0 | 3.477423  | 3.607783  | 1.241662  |
| 39 | 6  | 0 | 2.605453  | 2.743414  | 0.582158  |
| 40 | 6  | 0 | 3.078450  | 1.543111  | 0.051215  |
| 41 | 6  | 0 | 4.944887  | -0.091905 | -0.387263 |
| 42 | 6  | 0 | 6.168930  | -0.143430 | -1.073124 |
| 43 | 6  | 0 | 6.660287  | -1.340045 | -1.590864 |
| 44 | 6  | 0 | 5.925793  | -2.518512 | -1.436018 |
| 45 | 6  | 0 | 4.707487  | -2.493683 | -0.759824 |
| 46 | 6  | 0 | 4.228186  | -1.293900 | -0.237172 |
| 47 | 1  | 0 | 6.333444  | 1.787288  | 0.969878  |
| 48 | 1  | 0 | 5.510941  | 3.934025  | 1.892155  |
| 49 | 1  | 0 | 3.102457  | 4.540795  | 1.654072  |
| 50 | 1  | 0 | 1.554642  | 2.986113  | 0.465745  |
| 51 | 1  | 0 | 6.726063  | 0.778665  | -1.215338 |
| 52 | 1  | 0 | 7.606905  | -1.350535 | -2.124127 |
| 53 | 1  | 0 | 6.297544  | -3.454251 | -1.844807 |
| 54 | 1  | 0 | 4.111653  | -3.389562 | -0.621206 |
| 55 | 8  | 0 | 2.212941  | 0.763761  | -0.690807 |
| 56 | 8  | 0 | 3.069985  | -1.312482 | 0.515447  |
| 57 | 15 | 0 | 1.667684  | -0.706778 | -0.122609 |
| 58 | 8  | 0 | 0.785827  | -0.455688 | 1.086327  |

|    |   |   |           |           |           |
|----|---|---|-----------|-----------|-----------|
| 59 | 8 | 0 | 1.178561  | -1.485018 | -1.296641 |
| 60 | 6 | 0 | -6.025778 | 1.034840  | -2.237912 |
| 61 | 1 | 0 | -5.834956 | 0.763147  | -3.279860 |
| 62 | 1 | 0 | -7.057502 | 1.364182  | -2.110955 |
| 63 | 1 | 0 | -5.324367 | 1.817473  | -1.939218 |
| 64 | 6 | 0 | -2.282232 | -2.433929 | -0.656080 |
| 65 | 1 | 0 | -2.074705 | -1.755523 | -1.473621 |

-----

***s-cis\_TS-Ct(R-en)***

B3LYP-D3/6-31g(d) in gas phase

SCF Done: E(RB3LYP) = -2023.701474 hartree

Sum of electronic and thermal Free Energies = -2023.252217 hartree

The number of imaginary frequency = 1

Imaginary frequency = -332.07

-----

| Center Number | Atomic Number | Atomic Type | Coordinates (Angstroms) |   |   |
|---------------|---------------|-------------|-------------------------|---|---|
|               |               |             | X                       | Y | Z |

|    |   |   |           |           |           |
|----|---|---|-----------|-----------|-----------|
| 1  | 6 | 0 | -2.922332 | -3.619353 | -0.791428 |
| 2  | 1 | 0 | -3.988854 | -3.493904 | -0.623181 |
| 3  | 1 | 0 | -2.656545 | -4.521717 | -1.335795 |
| 4  | 6 | 0 | -1.984753 | -3.102987 | 0.096810  |
| 5  | 1 | 0 | -0.965248 | -3.472364 | 0.002969  |
| 6  | 6 | 0 | -3.359402 | -1.343779 | 1.119402  |
| 7  | 1 | 0 | -4.277925 | -1.792094 | 0.756453  |
| 8  | 1 | 0 | -4.557835 | 0.145510  | 1.854787  |
| 9  | 7 | 0 | -3.595765 | -0.154299 | 1.779829  |
| 10 | 6 | 0 | -2.733124 | 0.854037  | 2.220346  |
| 11 | 8 | 0 | -1.448609 | 0.515983  | 2.094534  |
| 12 | 8 | 0 | -3.160342 | 1.904743  | 2.656098  |
| 13 | 1 | 0 | -0.992048 | -0.278143 | -1.706557 |
| 14 | 6 | 0 | -0.161061 | 4.131741  | -0.199190 |
| 15 | 6 | 0 | -1.528598 | 3.927869  | -0.189302 |
| 16 | 6 | 0 | -2.068826 | 2.695596  | -0.616175 |
| 17 | 6 | 0 | -1.189427 | 1.663994  | -1.041673 |
| 18 | 6 | 0 | 0.202732  | 1.881003  | -1.053149 |
| 19 | 6 | 0 | 0.699722  | 3.102725  | -0.636427 |
| 20 | 1 | 0 | -4.162481 | 3.191335  | -0.321619 |
| 21 | 1 | 0 | 0.251716  | 5.081457  | 0.127849  |
| 22 | 1 | 0 | -2.207257 | 4.707153  | 0.146924  |
| 23 | 6 | 0 | -3.469613 | 2.422349  | -0.652249 |
| 24 | 1 | 0 | 0.860210  | 1.089982  | -1.387086 |
| 25 | 1 | 0 | 1.773343  | 3.258328  | -0.648173 |
| 26 | 6 | 0 | -3.032763 | 0.171608  | -1.493180 |
| 27 | 6 | 0 | -3.931833 | 1.217629  | -1.089246 |
| 28 | 1 | 0 | -4.996417 | 1.010994  | -1.126517 |
| 29 | 7 | 0 | -1.705634 | 0.455166  | -1.455440 |
| 30 | 6 | 0 | -3.556155 | -1.071316 | -1.930828 |
| 31 | 1 | 0 | -4.642592 | -1.113740 | -1.957567 |
| 32 | 6 | 0 | -2.847201 | -2.210182 | -2.328186 |
| 33 | 1 | 0 | -1.771622 | -2.163384 | -2.479487 |
| 34 | 1 | 0 | -3.365910 | -2.907474 | -2.980997 |
| 35 | 6 | 0 | 3.080624  | -0.335451 | 1.138399  |
| 36 | 6 | 0 | 3.941279  | -0.264326 | 2.245833  |
| 37 | 6 | 0 | 3.615728  | -0.866674 | 3.459309  |

|    |    |   |           |           |           |
|----|----|---|-----------|-----------|-----------|
| 38 | 6  | 0 | 2.414582  | -1.568899 | 3.585675  |
| 39 | 6  | 0 | 1.544037  | -1.656580 | 2.500947  |
| 40 | 6  | 0 | 1.867814  | -1.037693 | 1.292658  |
| 41 | 6  | 0 | 3.422804  | 0.322512  | -0.142663 |
| 42 | 6  | 0 | 3.996782  | 1.604400  | -0.169686 |
| 43 | 6  | 0 | 4.315330  | 2.234192  | -1.371969 |
| 44 | 6  | 0 | 4.052702  | 1.589896  | -2.584404 |
| 45 | 6  | 0 | 3.491042  | 0.314498  | -2.585193 |
| 46 | 6  | 0 | 3.191869  | -0.318015 | -1.377630 |
| 47 | 1  | 0 | 4.889532  | 0.254862  | 2.136649  |
| 48 | 1  | 0 | 4.303649  | -0.801757 | 4.297537  |
| 49 | 1  | 0 | 2.157872  | -2.053065 | 4.523903  |
| 50 | 1  | 0 | 0.607374  | -2.199045 | 2.570279  |
| 51 | 1  | 0 | 4.171884  | 2.116536  | 0.772827  |
| 52 | 1  | 0 | 4.756338  | 3.227286  | -1.363015 |
| 53 | 1  | 0 | 4.286285  | 2.077808  | -3.526637 |
| 54 | 1  | 0 | 3.281035  | -0.217976 | -3.506587 |
| 55 | 8  | 0 | 0.933714  | -1.028478 | 0.281348  |
| 56 | 8  | 0 | 2.737559  | -1.616315 | -1.408834 |
| 57 | 15 | 0 | 1.142928  | -1.959509 | -1.105269 |
| 58 | 8  | 0 | 1.032151  | -3.411778 | -0.807404 |
| 59 | 8  | 0 | 0.260880  | -1.252213 | -2.115169 |
| 60 | 6  | 0 | -0.491216 | 1.510164  | 2.520854  |
| 61 | 1  | 0 | -0.592347 | 1.683439  | 3.595270  |
| 62 | 1  | 0 | 0.479951  | 1.081236  | 2.283344  |
| 63 | 1  | 0 | -0.651092 | 2.441994  | 1.977712  |
| 64 | 6  | 0 | -2.160620 | -1.983455 | 0.946012  |
| 65 | 1  | 0 | -1.268717 | -1.555227 | 1.378431  |

-----

***s-cis\_TS-Ct(S-en)***

B3LYP-D3/6-31g(d) in gas phase

SCF Done: E(RB3LYP) = -2023.695583 hartree

Sum of electronic and thermal Free Energies = -2023.248121 hartree

The number of imaginary frequency = 1

Imaginary frequency = -333.31

-----

| Center Number | Atomic Number | Atomic Type | Coordinates (Angstroms) |   |   |
|---------------|---------------|-------------|-------------------------|---|---|
|               |               |             | X                       | Y | Z |

|    |   |   |           |           |           |
|----|---|---|-----------|-----------|-----------|
| 1  | 6 | 0 | -0.848509 | -3.007083 | 2.702596  |
| 2  | 1 | 0 | -1.796707 | -3.448314 | 2.997139  |
| 3  | 1 | 0 | -0.020446 | -3.240636 | 3.366671  |
| 4  | 6 | 0 | -0.563121 | -2.746845 | 1.367689  |
| 5  | 1 | 0 | 0.475785  | -2.550357 | 1.117701  |
| 6  | 6 | 0 | -2.853973 | -2.621234 | 0.507575  |
| 7  | 1 | 0 | -3.249753 | -3.123236 | 1.384475  |
| 8  | 1 | 0 | -4.806779 | -2.468301 | -0.099126 |
| 9  | 7 | 0 | -3.858513 | -2.230521 | -0.354218 |
| 10 | 6 | 0 | -3.836294 | -1.368847 | -1.461109 |
| 11 | 8 | 0 | -2.597401 | -1.003964 | -1.763526 |
| 12 | 8 | 0 | -4.860688 | -1.029386 | -2.020174 |
| 13 | 1 | 0 | -1.084519 | 0.636300  | 1.289195  |
| 14 | 6 | 0 | -3.166607 | 3.489227  | -1.862849 |
| 15 | 6 | 0 | -4.155818 | 2.780859  | -1.207104 |
| 16 | 6 | 0 | -3.822188 | 1.881747  | -0.170786 |

|    |    |   |           |           |           |
|----|----|---|-----------|-----------|-----------|
| 17 | 6  | 0 | -2.457093 | 1.705166  | 0.180410  |
| 18 | 6  | 0 | -1.454699 | 2.441488  | -0.484841 |
| 19 | 6  | 0 | -1.815919 | 3.316896  | -1.491612 |
| 20 | 1  | 0 | -5.840008 | 1.230514  | 0.295982  |
| 21 | 1  | 0 | -3.425378 | 4.178231  | -2.661098 |
| 22 | 1  | 0 | -5.201179 | 2.900594  | -1.478630 |
| 23 | 6  | 0 | -4.790446 | 1.126977  | 0.557197  |
| 24 | 1  | 0 | -0.418803 | 2.314715  | -0.198759 |
| 25 | 1  | 0 | -1.040823 | 3.876519  | -2.006790 |
| 26 | 6  | 0 | -3.022968 | 0.098589  | 1.889194  |
| 27 | 6  | 0 | -4.408229 | 0.286586  | 1.560025  |
| 28 | 1  | 0 | -5.144263 | -0.278007 | 2.122797  |
| 29 | 7  | 0 | -2.120369 | 0.821267  | 1.180257  |
| 30 | 6  | 0 | -2.660606 | -0.783466 | 2.941000  |
| 31 | 1  | 0 | -3.505002 | -1.240139 | 3.452140  |
| 32 | 6  | 0 | -1.375586 | -1.093955 | 3.392730  |
| 33 | 1  | 0 | -0.513909 | -0.549089 | 3.017746  |
| 34 | 1  | 0 | -1.284648 | -1.450549 | 4.415297  |
| 35 | 6  | 0 | 4.418005  | 0.764538  | 0.205839  |
| 36 | 6  | 0 | 5.554559  | 1.178970  | 0.918381  |
| 37 | 6  | 0 | 5.561307  | 2.364900  | 1.649949  |
| 38 | 6  | 0 | 4.416134  | 3.164142  | 1.688477  |
| 39 | 6  | 0 | 3.274639  | 2.774826  | 0.990106  |
| 40 | 6  | 0 | 3.279632  | 1.592483  | 0.252134  |
| 41 | 6  | 0 | 4.421985  | -0.491675 | -0.578314 |
| 42 | 6  | 0 | 5.521444  | -0.849342 | -1.374865 |
| 43 | 6  | 0 | 5.534451  | -2.036678 | -2.104212 |
| 44 | 6  | 0 | 4.433174  | -2.894960 | -2.056181 |
| 45 | 6  | 0 | 3.328734  | -2.562946 | -1.273544 |
| 46 | 6  | 0 | 3.329415  | -1.378689 | -0.539260 |
| 47 | 1  | 0 | 6.435643  | 0.543030  | 0.908271  |
| 48 | 1  | 0 | 6.452927  | 2.658047  | 2.197219  |
| 49 | 1  | 0 | 4.409637  | 4.086536  | 2.262962  |
| 50 | 1  | 0 | 2.370043  | 3.373997  | 0.996400  |
| 51 | 1  | 0 | 6.366191  | -0.168273 | -1.432224 |
| 52 | 1  | 0 | 6.395943  | -2.284970 | -2.717872 |
| 53 | 1  | 0 | 4.431288  | -3.818198 | -2.629227 |
| 54 | 1  | 0 | 2.457241  | -3.206643 | -1.213058 |
| 55 | 8  | 0 | 2.170737  | 1.287405  | -0.512956 |
| 56 | 8  | 0 | 2.266948  | -1.125264 | 0.308457  |
| 57 | 15 | 0 | 1.156639  | 0.051700  | -0.071900 |
| 58 | 8  | 0 | 0.510233  | 0.393433  | 1.257276  |
| 59 | 8  | 0 | 0.338113  | -0.301894 | -1.267701 |
| 60 | 6  | 0 | -2.411413 | -0.115167 | -2.885153 |
| 61 | 1  | 0 | -3.039827 | 0.769338  | -2.770550 |
| 62 | 1  | 0 | -1.353655 | 0.135864  | -2.841322 |
| 63 | 1  | 0 | -2.670912 | -0.635913 | -3.811215 |
| 64 | 6  | 0 | -1.498526 | -2.492135 | 0.336049  |
| 65 | 1  | 0 | -1.107933 | -2.060652 | -0.576027 |

Imaginary frequency = -380.04

| Center Number | Atomic Number | Atomic Type | Coordinates (Angstroms) |           |           |
|---------------|---------------|-------------|-------------------------|-----------|-----------|
|               |               |             | X                       | Y         | Z         |
| 1             | 6             | 0           | -0.075389               | -2.319305 | 2.727594  |
| 2             | 1             | 0           | 0.553847                | -1.719218 | 2.076954  |
| 3             | 1             | 0           | 0.434151                | -2.649226 | 3.629910  |
| 4             | 6             | 0           | -1.011384               | -3.202609 | 2.166057  |
| 5             | 1             | 0           | -1.323531               | -4.059207 | 2.762239  |
| 6             | 6             | 0           | -1.464879               | -1.832883 | 0.239127  |
| 7             | 1             | 0           | -0.564744               | -1.286822 | 0.473068  |
| 8             | 1             | 0           | -1.492492               | -0.502679 | -1.243187 |
| 9             | 7             | 0           | -2.042486               | -1.285316 | -0.861547 |
| 10            | 6             | 0           | -3.288782               | -1.490509 | -1.433562 |
| 11            | 8             | 0           | -3.979068               | -2.467059 | -0.803008 |
| 12            | 8             | 0           | -3.699211               | -0.849703 | -2.377055 |
| 13            | 1             | 0           | -0.891702               | 1.424594  | 1.485788  |
| 14            | 6             | 0           | -3.040856               | 4.105662  | -1.753113 |
| 15            | 6             | 0           | -3.939652               | 3.150820  | -1.316945 |
| 16            | 6             | 0           | -3.577707               | 2.241667  | -0.300646 |
| 17            | 6             | 0           | -2.277002               | 2.316411  | 0.259910  |
| 18            | 6             | 0           | -1.365651               | 3.292323  | -0.186635 |
| 19            | 6             | 0           | -1.753266               | 4.171216  | -1.181414 |
| 20            | 1             | 0           | -5.443011               | 1.132835  | -0.232179 |
| 21            | 1             | 0           | -3.320536               | 4.801062  | -2.538591 |
| 22            | 1             | 0           | -4.933496               | 3.081666  | -1.751159 |
| 23            | 6             | 0           | -4.448501               | 1.224201  | 0.196739  |
| 24            | 1             | 0           | -0.372815               | 3.325465  | 0.246992  |
| 25            | 1             | 0           | -1.047773               | 4.918573  | -1.532682 |
| 26            | 6             | 0           | -2.715109               | 0.442829  | 1.727494  |
| 27            | 6             | 0           | -4.042503               | 0.372298  | 1.179396  |
| 28            | 1             | 0           | -4.697670               | -0.410710 | 1.544698  |
| 29            | 7             | 0           | -1.909844               | 1.423380  | 1.244923  |
| 30            | 6             | 0           | -2.323493               | -0.482908 | 2.720575  |
| 31            | 1             | 0           | -3.119028               | -1.168352 | 3.000306  |
| 32            | 6             | 0           | -1.093081               | -0.648404 | 3.379799  |
| 33            | 1             | 0           | -0.295827               | 0.070920  | 3.202873  |
| 34            | 1             | 0           | -1.143955               | -1.022186 | 4.398174  |
| 35            | 6             | 0           | 4.454506                | 0.239177  | -0.232624 |
| 36            | 6             | 0           | 5.781002                | 0.298032  | 0.225058  |
| 37            | 6             | 0           | 6.320382                | 1.473383  | 0.743369  |
| 38            | 6             | 0           | 5.532741                | 2.624401  | 0.822191  |
| 39            | 6             | 0           | 4.212962                | 2.593221  | 0.375847  |
| 40            | 6             | 0           | 3.685431                | 1.415401  | -0.149082 |
| 41            | 6             | 0           | 3.896044                | -1.017387 | -0.783404 |
| 42            | 6             | 0           | 4.643807                | -1.828903 | -1.651565 |
| 43            | 6             | 0           | 4.134820                | -3.030066 | -2.141493 |
| 44            | 6             | 0           | 2.854186                | -3.447081 | -1.770581 |
| 45            | 6             | 0           | 2.089079                | -2.658871 | -0.912643 |
| 46            | 6             | 0           | 2.608232                | -1.459797 | -0.428771 |
| 47            | 1             | 0           | 6.384357                | -0.604848 | 0.188332  |
| 48            | 1             | 0           | 7.348036                | 1.487402  | 1.095495  |
| 49            | 1             | 0           | 5.942635                | 3.543516  | 1.231771  |
| 50            | 1             | 0           | 3.574809                | 3.469591  | 0.416258  |
| 51            | 1             | 0           | 5.632165                | -1.494846 | -1.954892 |
| 52            | 1             | 0           | 4.732818                | -3.634502 | -2.817696 |

*s-cis\_TS-Ct(R-ex)*

B3LYP-D3/6-31g(d) in gas phase

SCF Done: E(RB3LYP) = -2023.696603 hartree

Sum of electronic and thermal Free Energies = -2023.249273 hartree

The number of imaginary frequency = 1

|    |    |   |           |           |           |
|----|----|---|-----------|-----------|-----------|
| 53 | 1  | 0 | 2.449524  | -4.381347 | -2.149997 |
| 54 | 1  | 0 | 1.095201  | -2.961208 | -0.598313 |
| 55 | 8  | 0 | 2.409431  | 1.452175  | -0.684220 |
| 56 | 8  | 0 | 1.866130  | -0.740790 | 0.491939  |
| 57 | 15 | 0 | 1.149626  | 0.698416  | 0.054108  |
| 58 | 8  | 0 | 0.791789  | 1.351475  | 1.371217  |
| 59 | 8  | 0 | 0.093693  | 0.470507  | -0.985686 |
| 60 | 6  | 0 | -5.296734 | -2.693253 | -1.329713 |
| 61 | 1  | 0 | -5.247525 | -2.967088 | -2.386624 |
| 62 | 1  | 0 | -5.709264 | -3.510390 | -0.737207 |
| 63 | 1  | 0 | -5.909093 | -1.792959 | -1.224162 |
| 64 | 6  | 0 | -1.749990 | -2.958113 | 0.990755  |
| 65 | 1  | 0 | -2.570568 | -3.611285 | 0.722739  |

-----  
***s-cis\_TS-Ct(S-ex)***

B3LYP-D3/6-31g(d) in gas phase

SCF Done: E(RB3LYP) = -2023.696984 hartree

Sum of electronic and thermal Free Energies = -2023.250432 hartree

The number of imaginary frequency = 1

Imaginary frequency = -348.88

| Center Number | Atomic Number | Atomic Type | Coordinates (Angstroms) |           |           |
|---------------|---------------|-------------|-------------------------|-----------|-----------|
|               |               |             | X                       | Y         | Z         |
| 1             | 6             | 0           | -1.094836               | -3.774730 | -0.791969 |
| 2             | 1             | 0           | -0.336765               | -3.001056 | -0.703295 |
| 3             | 1             | 0           | -0.760296               | -4.665003 | -1.319337 |
| 4             | 6             | 0           | -2.067134               | -3.938181 | 0.200600  |
| 5             | 1             | 0           | -2.581618               | -4.897126 | 0.252326  |
| 6             | 6             | 0           | -2.016126               | -1.649933 | 0.953172  |
| 7             | 1             | 0           | -1.096032               | -1.537623 | 0.398144  |
| 8             | 1             | 0           | -1.585273               | 0.231821  | 1.459191  |
| 9             | 7             | 0           | -2.336114               | -0.469786 | 1.546755  |
| 10            | 6             | 0           | -3.519380               | -0.032928 | 2.119692  |
| 11            | 8             | 0           | -4.470318               | -0.994937 | 2.114806  |
| 12            | 8             | 0           | -3.675350               | 1.090717  | 2.547758  |
| 13            | 1             | 0           | -0.910224               | -0.190020 | -1.823493 |
| 14            | 6             | 0           | -1.635349               | 4.425369  | -1.097918 |
| 15            | 6             | 0           | -2.823239               | 3.751925  | -0.881861 |
| 16            | 6             | 0           | -2.910152               | 2.363181  | -1.114842 |
| 17            | 6             | 0           | -1.759677               | 1.667814  | -1.566723 |
| 18            | 6             | 0           | -0.554491               | 2.358775  | -1.790747 |
| 19            | 6             | 0           | -0.502665               | 3.720784  | -1.553938 |
| 20            | 1             | 0           | -4.983422               | 2.102518  | -0.522534 |
| 21            | 1             | 0           | -1.571550               | 5.493428  | -0.913835 |
| 22            | 1             | 0           | -3.704600               | 4.278779  | -0.525928 |
| 23            | 6             | 0           | -4.098426               | 1.597818  | -0.900962 |
| 24            | 1             | 0           | 0.323791                | 1.817794  | -2.123332 |
| 25            | 1             | 0           | 0.430635                | 4.250820  | -1.721997 |
| 26            | 6             | 0           | -2.954504               | -0.436625 | -1.608956 |
| 27            | 6             | 0           | -4.127567               | 0.259996  | -1.158950 |
| 28            | 1             | 0           | -5.028123               | -0.321235 | -0.994317 |
| 29            | 7             | 0           | -1.829529               | 0.306165  | -1.779575 |
| 30            | 6             | 0           | -3.010095               | -1.826824 | -1.855806 |
| 31            | 1             | 0           | -3.977259               | -2.269283 | -1.635094 |

|    |    |   |           |           |           |
|----|----|---|-----------|-----------|-----------|
| 32 | 6  | 0 | -2.008614 | -2.685478 | -2.327385 |
| 33 | 1  | 0 | -1.076374 | -2.268466 | -2.698430 |
| 34 | 1  | 0 | -2.341634 | -3.580345 | -2.843285 |
| 35 | 6  | 0 | 4.254173  | 0.740489  | 0.562087  |
| 36 | 6  | 0 | 5.240519  | 1.393786  | 1.318182  |
| 37 | 6  | 0 | 5.120259  | 2.739953  | 1.657997  |
| 38 | 6  | 0 | 3.996039  | 3.464191  | 1.252944  |
| 39 | 6  | 0 | 3.002388  | 2.839795  | 0.501055  |
| 40 | 6  | 0 | 3.140897  | 1.497954  | 0.154473  |
| 41 | 6  | 0 | 4.383390  | -0.688884 | 0.195785  |
| 42 | 6  | 0 | 5.608570  | -1.218479 | -0.240129 |
| 43 | 6  | 0 | 5.741467  | -2.564721 | -0.574120 |
| 44 | 6  | 0 | 4.637800  | -3.416343 | -0.483351 |
| 45 | 6  | 0 | 3.409731  | -2.916325 | -0.054183 |
| 46 | 6  | 0 | 3.288535  | -1.570272 | 0.284845  |
| 47 | 1  | 0 | 6.099867  | 0.822843  | 1.658986  |
| 48 | 1  | 0 | 5.894906  | 3.218639  | 2.250511  |
| 49 | 1  | 0 | 3.889747  | 4.510368  | 1.526539  |
| 50 | 1  | 0 | 2.111696  | 3.366730  | 0.174657  |
| 51 | 1  | 0 | 6.460115  | -0.550111 | -0.333954 |
| 52 | 1  | 0 | 6.700488  | -2.945251 | -0.914350 |
| 53 | 1  | 0 | 4.731307  | -4.466212 | -0.747433 |
| 54 | 1  | 0 | 2.533631  | -3.550476 | 0.035492  |
| 55 | 8  | 0 | 2.193433  | 0.928001  | -0.678891 |
| 56 | 8  | 0 | 2.083402  | -1.133287 | 0.805583  |
| 57 | 15 | 0 | 1.094514  | -0.140612 | -0.062245 |
| 58 | 8  | 0 | 0.156313  | 0.519596  | 0.902232  |
| 59 | 8  | 0 | 0.536579  | -0.877205 | -1.266365 |
| 60 | 6  | 0 | -5.732088 | -0.580539 | 2.662875  |
| 61 | 1  | 0 | -6.149447 | 0.245296  | 2.079399  |
| 62 | 1  | 0 | -6.376387 | -1.458249 | 2.602522  |
| 63 | 1  | 0 | -5.614271 | -0.257325 | 3.700325  |
| 64 | 6  | 0 | -2.589087 | -2.904515 | 1.007504  |
| 65 | 1  | 0 | -3.455625 | -3.092145 | 1.628730  |

-----  
***s-cis\_TS-Tc(R-en)***

B3LYP-D3/6-31g(d) in gas phase

SCF Done: E(RB3LYP) = -2023.704067 hartree

Sum of electronic and thermal Free Energies = -2023.257652 hartree

The number of imaginary frequency = 1

Imaginary frequency = -362.62

| Center Number | Atomic Number | Atomic Type | Coordinates (Angstroms) |           |          |
|---------------|---------------|-------------|-------------------------|-----------|----------|
|               |               |             | X                       | Y         | Z        |
| 1             | 6             | 0           | -1.179273               | -4.489308 | 0.452986 |
| 2             | 1             | 0           | -2.231522               | -4.510919 | 0.715198 |
| 3             | 1             | 0           | -0.781997               | -5.441643 | 0.111220 |
| 4             | 6             | 0           | -0.312132               | -3.611901 | 1.096107 |
| 5             | 1             | 0           | 0.754074                | -3.812867 | 1.005901 |
| 6             | 6             | 0           | -1.906628               | -1.844085 | 1.729251 |
| 7             | 1             | 0           | -2.809216               | -2.437733 | 1.625776 |
| 8             | 1             | 0           | -1.298933               | 0.114604  | 1.700697 |
| 9             | 7             | 0           | -2.108722               | -0.507815 | 1.890961 |
| 10            | 6             | 0           | -3.382038               | 0.018661  | 2.013723 |

|    |    |   |           |           |           |
|----|----|---|-----------|-----------|-----------|
| 11 | 8  | 0 | -3.319198 | 1.362879  | 1.930491  |
| 12 | 8  | 0 | -4.398620 | -0.632711 | 2.162183  |
| 13 | 1  | 0 | -1.098753 | -0.673871 | -1.333273 |
| 14 | 6  | 0 | -3.036621 | 3.643931  | -1.588875 |
| 15 | 6  | 0 | -4.054077 | 2.721730  | -1.429474 |
| 16 | 6  | 0 | -3.764888 | 1.342501  | -1.359764 |
| 17 | 6  | 0 | -2.414576 | 0.913871  | -1.449851 |
| 18 | 6  | 0 | -1.384382 | 1.857175  | -1.637400 |
| 19 | 6  | 0 | -1.702470 | 3.201788  | -1.698942 |
| 20 | 1  | 0 | -5.804789 | 0.633966  | -1.111221 |
| 21 | 1  | 0 | -3.262535 | 4.704818  | -1.639589 |
| 22 | 1  | 0 | -5.090355 | 3.042907  | -1.358552 |
| 23 | 6  | 0 | -4.763272 | 0.334160  | -1.195371 |
| 24 | 1  | 0 | -0.359919 | 1.524208  | -1.742276 |
| 25 | 1  | 0 | -0.905123 | 3.925912  | -1.839313 |
| 26 | 6  | 0 | -3.055610 | -1.409095 | -1.230474 |
| 27 | 6  | 0 | -4.424838 | -0.983533 | -1.136557 |
| 28 | 1  | 0 | -5.184431 | -1.744678 | -0.999714 |
| 29 | 7  | 0 | -2.122989 | -0.431863 | -1.363537 |
| 30 | 6  | 0 | -2.764031 | -2.797933 | -1.246032 |
| 31 | 1  | 0 | -3.653368 | -3.422765 | -1.198786 |
| 32 | 6  | 0 | -1.538575 | -3.456044 | -1.375404 |
| 33 | 1  | 0 | -0.621164 | -2.884023 | -1.488581 |
| 34 | 1  | 0 | -1.542335 | -4.422932 | -1.870132 |
| 35 | 6  | 0 | 4.219960  | 1.206714  | 0.231684  |
| 36 | 6  | 0 | 5.205977  | 1.980280  | 0.864671  |
| 37 | 6  | 0 | 4.982296  | 3.317304  | 1.187337  |
| 38 | 6  | 0 | 3.753442  | 3.910705  | 0.887237  |
| 39 | 6  | 0 | 2.757673  | 3.164581  | 0.259444  |
| 40 | 6  | 0 | 2.996292  | 1.832522  | -0.069839 |
| 41 | 6  | 0 | 4.462959  | -0.210520 | -0.123188 |
| 42 | 6  | 0 | 5.684027  | -0.618069 | -0.683837 |
| 43 | 6  | 0 | 5.924576  | -1.950084 | -1.014671 |
| 44 | 6  | 0 | 4.934077  | -2.910479 | -0.796410 |
| 45 | 6  | 0 | 3.712943  | -2.531922 | -0.241789 |
| 46 | 6  | 0 | 3.485160  | -1.199788 | 0.096958  |
| 47 | 1  | 0 | 6.151283  | 1.510719  | 1.122625  |
| 48 | 1  | 0 | 5.760216  | 3.890828  | 1.683486  |
| 49 | 1  | 0 | 3.568325  | 4.949685  | 1.145805  |
| 50 | 1  | 0 | 1.790312  | 3.590283  | 0.013901  |
| 51 | 1  | 0 | 6.443357  | 0.134276  | -0.878609 |
| 52 | 1  | 0 | 6.876929  | -2.235093 | -1.452814 |
| 53 | 1  | 0 | 5.109404  | -3.950022 | -1.059615 |
| 54 | 1  | 0 | 2.922800  | -3.252782 | -0.058619 |
| 55 | 8  | 0 | 2.029923  | 1.142301  | -0.781040 |
| 56 | 8  | 0 | 2.304871  | -0.879416 | 0.744047  |
| 57 | 15 | 0 | 1.123618  | -0.013304 | -0.024076 |
| 58 | 8  | 0 | 0.263496  | 0.592667  | 1.045806  |
| 59 | 8  | 0 | 0.514991  | -0.833123 | -1.139636 |
| 60 | 6  | 0 | -4.577653 | 2.035641  | 2.064353  |
| 61 | 1  | 0 | -4.995193 | 1.874757  | 3.062667  |
| 62 | 1  | 0 | -4.358474 | 3.090752  | 1.901366  |
| 63 | 1  | 0 | -5.288336 | 1.672397  | 1.317517  |
| 64 | 6  | 0 | -0.637112 | -2.368312 | 1.670903  |
| 65 | 1  | 0 | 0.186520  | -1.717202 | 1.938650  |

*s-cis\_TS-Tc(S-en)*

B3LYP-D3/6-31g(d) in gas phase

SCF Done: E(RB3LYP) = -2023.703942 hartree

Sum of electronic and thermal Free Energies = -2023.257691 hartree

The number of imaginary frequency = 1

Imaginary frequency = -359.42

| Center Number | Atomic Number | Atomic Type | Coordinates (Angstroms) |           |           |
|---------------|---------------|-------------|-------------------------|-----------|-----------|
|               |               |             | X                       | Y         | Z         |
| 1             | 6             | 0           | -1.075747               | -3.516160 | 2.695128  |
| 2             | 1             | 0           | -2.122951               | -3.747048 | 2.530906  |
| 3             | 1             | 0           | -0.653841               | -3.955049 | 3.595495  |
| 4             | 6             | 0           | -0.226454               | -3.296209 | 1.615602  |
| 5             | 1             | 0           | 0.844524                | -3.327058 | 1.808149  |
| 6             | 6             | 0           | -1.863587               | -2.494842 | -0.047724 |
| 7             | 1             | 0           | -2.756883               | -2.861345 | 0.447760  |
| 8             | 1             | 0           | -1.286389               | -1.045909 | -1.381621 |
| 9             | 7             | 0           | -2.085296               | -1.637985 | -1.082706 |
| 10            | 6             | 0           | -3.366924               | -1.351436 | -1.518754 |
| 11            | 8             | 0           | -3.323696               | -0.320578 | -2.385736 |
| 12            | 8             | 0           | -4.373672               | -1.934277 | -1.163367 |
| 13            | 1             | 0           | -1.132617               | 0.443919  | 1.327644  |
| 14            | 6             | 0           | -3.220793               | 3.682554  | -1.436675 |
| 15            | 6             | 0           | -4.207804               | 2.908427  | -0.855304 |
| 16            | 6             | 0           | -3.869863               | 1.873974  | 0.042475  |
| 17            | 6             | 0           | -2.502445               | 1.638340  | 0.342661  |
| 18            | 6             | 0           | -1.502910               | 2.444171  | -0.237704 |
| 19            | 6             | 0           | -1.868008               | 3.445735  | -1.119029 |
| 20            | 1             | 0           | -5.888333               | 1.175282  | 0.446234  |
| 21            | 1             | 0           | -3.484294               | 4.475012  | -2.130699 |
| 22            | 1             | 0           | -5.257112               | 3.083571  | -1.079831 |
| 23            | 6             | 0           | -4.834831               | 1.027428  | 0.669912  |
| 24            | 1             | 0           | -0.463625               | 2.276909  | 0.011658  |
| 25            | 1             | 0           | -1.093112               | 4.057028  | -1.571910 |
| 26            | 6             | 0           | -3.063685               | -0.183022 | 1.834517  |
| 27            | 6             | 0           | -4.449605               | 0.042982  | 1.527702  |
| 28            | 1             | 0           | -5.183810               | -0.604882 | 1.992920  |
| 29            | 7             | 0           | -2.163821               | 0.618453  | 1.208272  |
| 30            | 6             | 0           | -2.722904               | -1.163334 | 2.801578  |
| 31            | 1             | 0           | -3.589443               | -1.662712 | 3.229659  |
| 32            | 6             | 0           | -1.472702               | -1.521219 | 3.313818  |
| 33            | 1             | 0           | -0.576636               | -1.006746 | 2.976118  |
| 34            | 1             | 0           | -1.440263               | -1.875709 | 4.339965  |
| 35            | 6             | 0           | 4.354525                | 0.894120  | 0.194137  |
| 36            | 6             | 0           | 5.491617                | 1.306434  | 0.907412  |
| 37            | 6             | 0           | 5.465704                | 2.432102  | 1.728163  |
| 38            | 6             | 0           | 4.287544                | 3.171485  | 1.858128  |
| 39            | 6             | 0           | 3.144530                | 2.782761  | 1.161899  |
| 40            | 6             | 0           | 3.183130                | 1.661245  | 0.336198  |
| 41            | 6             | 0           | 4.393354                | -0.295924 | -0.686446 |
| 42            | 6             | 0           | 5.487629                | -0.536494 | -1.532787 |
| 43            | 6             | 0           | 5.540585                | -1.663400 | -2.350514 |
| 44            | 6             | 0           | 4.486077                | -2.579455 | -2.341684 |
| 45            | 6             | 0           | 3.387330                | -2.363422 | -1.511956 |
| 46            | 6             | 0           | 3.346160                | -1.236652 | -0.693295 |



|    |    |   |           |           |           |
|----|----|---|-----------|-----------|-----------|
| 47 | 1  | 0 | 6.399977  | 0.715852  | 0.825582  |
| 48 | 1  | 0 | 6.358774  | 2.724440  | 2.273350  |
| 49 | 1  | 0 | 4.256428  | 4.046134  | 2.502050  |
| 50 | 1  | 0 | 2.214423  | 3.336333  | 1.237647  |
| 51 | 1  | 0 | 6.296119  | 0.188979  | -1.556515 |
| 52 | 1  | 0 | 6.396851  | -1.820130 | -3.000458 |
| 53 | 1  | 0 | 4.515752  | -3.457594 | -2.980808 |
| 54 | 1  | 0 | 2.555164  | -3.059263 | -1.477757 |
| 55 | 8  | 0 | 2.064144  | 1.360450  | -0.420659 |
| 56 | 8  | 0 | 2.290017  | -1.106129 | 0.192204  |
| 57 | 15 | 0 | 1.129636  | 0.052395  | -0.041128 |
| 58 | 8  | 0 | 0.490110  | 0.243784  | 1.316111  |
| 59 | 8  | 0 | 0.290659  | -0.229824 | -1.252771 |
| 60 | 6  | 0 | -4.591766 | 0.060084  | -2.935898 |
| 61 | 1  | 0 | -5.300325 | 0.296441  | -2.138192 |
| 62 | 1  | 0 | -4.388930 | 0.943980  | -3.540205 |
| 63 | 1  | 0 | -5.000565 | -0.746967 | -3.551130 |
| 64 | 6  | 0 | -0.585155 | -2.811778 | 0.342516  |
| 65 | 1  | 0 | 0.221894  | -2.501044 | -0.308762 |

-----  
***s-cis\_TS-Tc(R-ex)***

B3LYP-D3/6-31g(d) in gas phase

SCF Done: E(RB3LYP) = -2023.692914 hartree

Sum of electronic and thermal Free Energies = -2023.246881 hartree

The number of imaginary frequency = 1

Imaginary frequency = -357.15

| Center Number | Atomic Number | Atomic Type | Coordinates (Angstroms) |           |           |
|---------------|---------------|-------------|-------------------------|-----------|-----------|
|               |               |             | X                       | Y         | Z         |
| 1             | 6             | 0           | 0.029486                | 3.181944  | 1.378104  |
| 2             | 1             | 0           | -0.232737               | 2.362433  | 0.716378  |
| 3             | 1             | 0           | -0.790095               | 3.556618  | 1.986660  |
| 4             | 6             | 0           | 1.002265                | 4.090319  | 0.953055  |
| 5             | 1             | 0           | 1.023345                | 5.083832  | 1.399504  |
| 6             | 6             | 0           | 2.265902                | 2.496482  | -0.418282 |
| 7             | 1             | 0           | 1.485605                | 1.735211  | -0.427405 |
| 8             | 1             | 0           | 4.169027                | 2.810433  | -1.173750 |
| 9             | 7             | 0           | 3.398435                | 2.156106  | -1.107777 |
| 10            | 6             | 0           | 3.581929                | 0.911834  | -1.705398 |
| 11            | 8             | 0           | 4.821917                | 0.868175  | -2.247541 |
| 12            | 8             | 0           | 2.767434                | 0.020738  | -1.732101 |
| 13            | 1             | 0           | 0.895301                | -0.589005 | 1.532492  |
| 14            | 6             | 0           | 3.322059                | -4.077671 | -0.532626 |
| 15            | 6             | 0           | 4.223614                | -3.105795 | -0.143171 |
| 16            | 6             | 0           | 3.776346                | -1.935456 | 0.507404  |
| 17            | 6             | 0           | 2.388639                | -1.777508 | 0.765149  |
| 18            | 6             | 0           | 1.473724                | -2.776681 | 0.372830  |
| 19            | 6             | 0           | 1.945629                | -3.904394 | -0.271919 |
| 20            | 1             | 0           | 5.711752                | -0.974507 | 0.735327  |
| 21            | 1             | 0           | 3.668503                | -4.974316 | -1.037766 |
| 22            | 1             | 0           | 5.288066                | -3.226850 | -0.330832 |
| 23            | 6             | 0           | 4.643578                | -0.878543 | 0.915371  |
| 24            | 1             | 0           | 0.418418                | -2.631435 | 0.575449  |
| 25            | 1             | 0           | 1.241281                | -4.669513 | -0.585574 |

|    |    |   |           |           |           |
|----|----|---|-----------|-----------|-----------|
| 26 | 6  | 0 | 2.735606  | 0.395210  | 1.749169  |
| 27 | 6  | 0 | 4.143784  | 0.245491  | 1.502657  |
| 28 | 1  | 0 | 4.798245  | 1.059007  | 1.796290  |
| 29 | 7  | 0 | 1.940748  | -0.645866 | 1.402624  |
| 30 | 6  | 0 | 2.254076  | 1.581581  | 2.356527  |
| 31 | 1  | 0 | 3.036256  | 2.299257  | 2.586661  |
| 32 | 6  | 0 | 0.943236  | 1.920480  | 2.728466  |
| 33 | 1  | 0 | 0.164056  | 1.162555  | 2.690748  |
| 34 | 1  | 0 | 0.849052  | 2.621551  | 3.551979  |
| 35 | 6  | 0 | -4.444190 | -0.974650 | -0.220742 |
| 36 | 6  | 0 | -5.636114 | -1.636914 | 0.114443  |
| 37 | 6  | 0 | -5.649201 | -2.991202 | 0.441642  |
| 38 | 6  | 0 | -4.455302 | -3.716463 | 0.445348  |
| 39 | 6  | 0 | -3.258394 | -3.082573 | 0.117528  |
| 40 | 6  | 0 | -3.254704 | -1.728969 | -0.215208 |
| 41 | 6  | 0 | -4.443797 | 0.461510  | -0.581548 |
| 42 | 6  | 0 | -5.433193 | 1.002568  | -1.417945 |
| 43 | 6  | 0 | -5.443832 | 2.356256  | -1.748366 |
| 44 | 6  | 0 | -4.450361 | 3.202080  | -1.248828 |
| 45 | 6  | 0 | -3.456528 | 2.689958  | -0.416766 |
| 46 | 6  | 0 | -3.460023 | 1.336547  | -0.083289 |
| 47 | 1  | 0 | -6.560137 | -1.065504 | 0.135028  |
| 48 | 1  | 0 | -6.585753 | -3.475651 | 0.703547  |
| 49 | 1  | 0 | -4.454506 | -4.771565 | 0.705398  |
| 50 | 1  | 0 | -2.314949 | -3.618561 | 0.102948  |
| 51 | 1  | 0 | -6.189516 | 0.338429  | -1.827398 |
| 52 | 1  | 0 | -6.217276 | 2.746905  | -2.403845 |
| 53 | 1  | 0 | -4.445947 | 4.257044  | -1.509616 |
| 54 | 1  | 0 | -2.669947 | 3.318862  | -0.012547 |
| 55 | 8  | 0 | -2.067836 | -1.161700 | -0.637296 |
| 56 | 8  | 0 | -2.524330 | 0.875800  | 0.822643  |
| 57 | 15 | 0 | -1.263139 | -0.067905 | 0.303644  |
| 58 | 8  | 0 | -0.734853 | -0.729409 | 1.561945  |
| 59 | 8  | 0 | -0.328432 | 0.695799  | -0.580710 |
| 60 | 6  | 0 | 5.121790  | -0.367813 | -2.921425 |
| 61 | 1  | 0 | 4.452133  | -0.509171 | -3.774204 |
| 62 | 1  | 0 | 6.155111  | -0.271514 | -3.256088 |
| 63 | 1  | 0 | 5.007827  | -1.213604 | -2.238542 |
| 64 | 6  | 0 | 2.088912  | 3.754081  | 0.123480  |
| 65 | 1  | 0 | 2.868887  | 4.500478  | -0.028919 |

-----  
***s-cis\_TS-Tc(S-ex)***

B3LYP-D3/6-31g(d) in gas phase

SCF Done: E(RB3LYP) = -2023.696747 hartree

Sum of electronic and thermal Free Energies = -2023.249192 hartree

The number of imaginary frequency = 1

Imaginary frequency = -348.00

| Center Number | Atomic Number | Atomic Type | Coordinates (Angstroms) |          |          |
|---------------|---------------|-------------|-------------------------|----------|----------|
|               |               |             | X                       | Y        | Z        |
| 1             | 6             | 0           | 1.498287                | 4.003001 | 0.918675 |
| 2             | 1             | 0           | 0.745018                | 3.218024 | 0.974888 |
| 3             | 1             | 0           | 1.107911                | 5.003807 | 0.747420 |
| 4             | 6             | 0           | 2.652747                | 3.889163 | 1.694820 |

|    |    |   |           |           |           |
|----|----|---|-----------|-----------|-----------|
| 5  | 1  | 0 | 3.208192  | 4.793247  | 1.942593  |
| 6  | 6  | 0 | 2.753639  | 1.443093  | 1.669302  |
| 7  | 1  | 0 | 1.739032  | 1.323192  | 1.291764  |
| 8  | 1  | 0 | 4.349987  | 0.270556  | 2.288859  |
| 9  | 7  | 0 | 3.418460  | 0.264852  | 1.890820  |
| 10 | 6  | 0 | 2.892912  | -0.973729 | 1.546279  |
| 11 | 8  | 0 | 3.789771  | -1.937169 | 1.852226  |
| 12 | 8  | 0 | 1.804895  | -1.157184 | 1.048000  |
| 13 | 1  | 0 | 0.813315  | 1.021657  | -1.627049 |
| 14 | 6  | 0 | 1.368597  | -3.579263 | -2.573923 |
| 15 | 6  | 0 | 2.612741  | -3.049982 | -2.287524 |
| 16 | 6  | 0 | 2.752780  | -1.676483 | -1.991321 |
| 17 | 6  | 0 | 1.599527  | -0.847697 | -1.999287 |
| 18 | 6  | 0 | 0.335806  | -1.390387 | -2.307026 |
| 19 | 6  | 0 | 0.233092  | -2.741081 | -2.581359 |
| 20 | 1  | 0 | 4.898511  | -1.675367 | -1.649619 |
| 21 | 1  | 0 | 1.262348  | -4.636867 | -2.796424 |
| 22 | 1  | 0 | 3.499798  | -3.679257 | -2.287643 |
| 23 | 6  | 0 | 3.999515  | -1.063685 | -1.665188 |
| 24 | 1  | 0 | -0.534297 | -0.746266 | -2.292294 |
| 25 | 1  | 0 | -0.743211 | -3.162234 | -2.802507 |
| 26 | 6  | 0 | 2.890404  | 1.090571  | -1.366762 |
| 27 | 6  | 0 | 4.066287  | 0.264294  | -1.365238 |
| 28 | 1  | 0 | 5.011103  | 0.730513  | -1.107592 |
| 29 | 7  | 0 | 1.722632  | 0.492002  | -1.709845 |
| 30 | 6  | 0 | 3.007582  | 2.468055  | -1.057620 |
| 31 | 1  | 0 | 4.029156  | 2.779985  | -0.859315 |
| 32 | 6  | 0 | 2.019096  | 3.461407  | -1.020361 |
| 33 | 1  | 0 | 1.005312  | 3.219266  | -1.331707 |
| 34 | 1  | 0 | 2.344010  | 4.469951  | -1.255815 |
| 35 | 6  | 0 | -3.557237 | -0.927311 | 1.015317  |
| 36 | 6  | 0 | -4.243503 | -1.662971 | 1.994933  |
| 37 | 6  | 0 | -3.563314 | -2.495030 | 2.882178  |
| 38 | 6  | 0 | -2.171522 | -2.604532 | 2.809310  |
| 39 | 6  | 0 | -1.464053 | -1.884463 | 1.848102  |
| 40 | 6  | 0 | -2.157857 | -1.061849 | 0.962928  |
| 41 | 6  | 0 | -4.273809 | -0.065814 | 0.046484  |
| 42 | 6  | 0 | -5.465093 | -0.500296 | -0.557671 |
| 43 | 6  | 0 | -6.151187 | 0.294488  | -1.473500 |
| 44 | 6  | 0 | -5.648416 | 1.552611  | -1.813885 |
| 45 | 6  | 0 | -4.468137 | 2.008423  | -1.230020 |
| 46 | 6  | 0 | -3.792957 | 1.211768  | -0.306112 |
| 47 | 1  | 0 | -5.322818 | -1.558921 | 2.066781  |
| 48 | 1  | 0 | -4.117094 | -3.047509 | 3.636469  |
| 49 | 1  | 0 | -1.637293 | -3.246477 | 3.505205  |
| 50 | 1  | 0 | -0.384650 | -1.937368 | 1.755213  |
| 51 | 1  | 0 | -5.840088 | -1.490337 | -0.312391 |
| 52 | 1  | 0 | -7.067585 | -0.071620 | -1.928253 |
| 53 | 1  | 0 | -6.171538 | 2.177210  | -2.533022 |
| 54 | 1  | 0 | -4.052446 | 2.982398  | -1.465848 |
| 55 | 8  | 0 | -1.455523 | -0.430504 | -0.043993 |
| 56 | 8  | 0 | -2.692843 | 1.750306  | 0.331568  |
| 57 | 15 | 0 | -1.162910 | 1.197137  | 0.050837  |
| 58 | 8  | 0 | -0.332881 | 1.545546  | 1.246525  |
| 59 | 8  | 0 | -0.700321 | 1.577111  | -1.343765 |
| 60 | 6  | 0 | 3.341604  | -3.274116 | 1.557817  |
| 61 | 1  | 0 | 3.059155  | -3.360665 | 0.505802  |

|    |   |   |          |           |          |
|----|---|---|----------|-----------|----------|
| 62 | 1 | 0 | 4.188880 | -3.919614 | 1.790844 |
| 63 | 1 | 0 | 2.480617 | -3.531887 | 2.180906 |
| 64 | 6 | 0 | 3.271938 | 2.667413  | 2.031205 |
| 65 | 1 | 0 | 4.243106 | 2.701111  | 2.525536 |

-----  
*s-cis\_TS-Tt(R-en)*

B3LYP-D3/6-31g(d) in gas phase

SCF Done: E(RB3LYP) = -2023.693730 hartree

Sum of electronic and thermal Free Energies = -2023.250337 hartree

The number of imaginary frequency = 1

Imaginary frequency = -357.08  
 -----

| Center Number | Atomic Number | Atomic Type | Coordinates (Angstroms) |           |           |
|---------------|---------------|-------------|-------------------------|-----------|-----------|
|               |               |             | X                       | Y         | Z         |
| 1             | 6             | 0           | 0.861820                | -3.397298 | -0.572150 |
| 2             | 1             | 0           | 1.829621                | -3.887833 | -0.634760 |
| 3             | 1             | 0           | 0.032924                | -4.077302 | -0.389893 |
| 4             | 6             | 0           | 0.600775                | -2.249759 | -1.320699 |
| 5             | 1             | 0           | -0.437446               | -1.969607 | -1.465807 |
| 6             | 6             | 0           | 2.902269                | -1.431117 | -1.538974 |
| 7             | 1             | 0           | 3.367367                | -2.357745 | -1.234299 |
| 8             | 1             | 0           | 3.411849                | 0.512002  | -2.013477 |
| 9             | 7             | 0           | 3.783130                | -0.400465 | -1.774300 |
| 10            | 6             | 0           | 5.150607                | -0.400350 | -1.562450 |
| 11            | 8             | 0           | 5.588724                | -1.618309 | -1.172484 |
| 12            | 8             | 0           | 5.849528                | 0.580598  | -1.711473 |
| 13            | 1             | 0           | 0.730644                | 0.038748  | 1.301268  |
| 14            | 6             | 0           | 2.556464                | 4.400718  | 1.131676  |
| 15            | 6             | 0           | 3.605613                | 3.502171  | 1.164473  |
| 16            | 6             | 0           | 3.355034                | 2.115397  | 1.252276  |
| 17            | 6             | 0           | 2.010426                | 1.657014  | 1.292030  |
| 18            | 6             | 0           | 0.944547                | 2.580645  | 1.276689  |
| 19            | 6             | 0           | 1.227046                | 3.931659  | 1.194731  |
| 20            | 1             | 0           | 5.423902                | 1.452887  | 1.278088  |
| 21            | 1             | 0           | 2.751828                | 5.466532  | 1.062272  |
| 22            | 1             | 0           | 4.635965                | 3.846090  | 1.125778  |
| 23            | 6             | 0           | 4.386843                | 1.130295  | 1.312372  |
| 24            | 1             | 0           | -0.074207               | 2.218164  | 1.335082  |
| 25            | 1             | 0           | 0.405879                | 4.642279  | 1.177117  |
| 26            | 6             | 0           | 2.718910                | -0.648705 | 1.370627  |
| 27            | 6             | 0           | 4.081492                | -0.195825 | 1.395235  |
| 28            | 1             | 0           | 4.862945                | -0.946686 | 1.426510  |
| 29            | 7             | 0           | 1.754686                | 0.304547  | 1.348546  |
| 30            | 6             | 0           | 2.435764                | -2.039308 | 1.383671  |
| 31            | 1             | 0           | 3.315208                | -2.674625 | 1.455405  |
| 32            | 6             | 0           | 1.178844                | -2.657850 | 1.321974  |
| 33            | 1             | 0           | 0.275774                | -2.062650 | 1.432901  |
| 34            | 1             | 0           | 1.112498                | -3.661082 | 1.736399  |
| 35            | 6             | 0           | -4.852317               | 0.514916  | -0.497248 |
| 36            | 6             | 0           | -6.003996               | 0.823475  | -1.238779 |
| 37            | 6             | 0           | -6.139126               | 2.044064  | -1.897088 |
| 38            | 6             | 0           | -5.110256               | 2.986867  | -1.831270 |
| 39            | 6             | 0           | -3.956415               | 2.705291  | -1.102199 |
| 40            | 6             | 0           | -3.833673               | 1.485959  | -0.438344 |

|    |    |   |           |           |           |
|----|----|---|-----------|-----------|-----------|
| 41 | 6  | 0 | -4.721306 | -0.781265 | 0.207017  |
| 42 | 6  | 0 | -5.795775 | -1.335156 | 0.921069  |
| 43 | 6  | 0 | -5.681387 | -2.562696 | 1.570846  |
| 44 | 6  | 0 | -4.474642 | -3.265076 | 1.523877  |
| 45 | 6  | 0 | -3.392789 | -2.736018 | 0.822636  |
| 46 | 6  | 0 | -3.518581 | -1.512121 | 0.167887  |
| 47 | 1  | 0 | -6.791737 | 0.078426  | -1.311061 |
| 48 | 1  | 0 | -7.038598 | 2.253395  | -2.469410 |
| 49 | 1  | 0 | -5.203362 | 3.937751  | -2.348949 |
| 50 | 1  | 0 | -3.139281 | 3.415049  | -1.027637 |
| 51 | 1  | 0 | -6.725958 | -0.776417 | 0.978120  |
| 52 | 1  | 0 | -6.527482 | -2.964038 | 2.121664  |
| 53 | 1  | 0 | -4.374706 | -4.219269 | 2.034264  |
| 54 | 1  | 0 | -2.441538 | -3.255771 | 0.763407  |
| 55 | 8  | 0 | -2.727952 | 1.281015  | 0.363644  |
| 56 | 8  | 0 | -2.463592 | -1.062114 | -0.599930 |
| 57 | 15 | 0 | -1.537276 | 0.222028  | -0.084901 |
| 58 | 8  | 0 | -0.745317 | 0.693205  | -1.256633 |
| 59 | 8  | 0 | -0.860852 | -0.154385 | 1.221376  |
| 60 | 6  | 0 | 7.005574  | -1.692552 | -0.936257 |
| 61 | 1  | 0 | 7.293455  | -1.017200 | -0.125505 |
| 62 | 1  | 0 | 7.198069  | -2.729430 | -0.660036 |
| 63 | 1  | 0 | 7.559749  | -1.422686 | -1.838513 |
| 64 | 6  | 0 | 1.552645  | -1.292104 | -1.728482 |
| 65 | 1  | 0 | 1.150295  | -0.345660 | -2.082000 |

-----  
***s-cis\_TS-Tt(S-en)***

B3LYP-D3/6-31g(d) in gas phase

SCF Done: E(RB3LYP) = -2023.693585 hartree

Sum of electronic and thermal Free Energies = -2023.249369 hartree

The number of imaginary frequency = 1

Imaginary frequency = -352.18

| Center Number | Atomic Number | Atomic Type | Coordinates (Angstroms) |           |           |
|---------------|---------------|-------------|-------------------------|-----------|-----------|
|               |               |             | X                       | Y         | Z         |
| 1             | 6             | 0           | -1.072835               | -2.939095 | 2.211981  |
| 2             | 1             | 0           | -2.086891               | -3.284588 | 2.393792  |
| 3             | 1             | 0           | -0.336853               | -3.331020 | 2.909244  |
| 4             | 6             | 0           | -0.648672               | -2.640468 | 0.919427  |
| 5             | 1             | 0           | 0.422723                | -2.572569 | 0.751823  |
| 6             | 6             | 0           | -2.831915               | -2.097391 | -0.063066 |
| 7             | 1             | 0           | -3.420106               | -2.529079 | 0.734336  |
| 8             | 1             | 0           | -3.072165               | -0.976857 | -1.778989 |
| 9             | 7             | 0           | -3.567005               | -1.460723 | -1.037581 |
| 10            | 6             | 0           | -4.934064               | -1.250287 | -1.053039 |
| 11            | 8             | 0           | -5.537526               | -1.857867 | -0.005963 |
| 12            | 8             | 0           | -5.501746               | -0.599772 | -1.905935 |
| 13            | 1             | 0           | -0.759576               | 0.794490  | 1.092839  |
| 14            | 6             | 0           | -2.285125               | 3.999687  | -2.043290 |
| 15            | 6             | 0           | -3.391091               | 3.401058  | -1.471217 |
| 16            | 6             | 0           | -3.233139               | 2.429932  | -0.458542 |
| 17            | 6             | 0           | -1.922688               | 2.067683  | -0.045098 |
| 18            | 6             | 0           | -0.799730               | 2.695790  | -0.621563 |
| 19            | 6             | 0           | -0.990639               | 3.644568  | -1.608706 |

|    |    |   |           |           |           |
|----|----|---|-----------|-----------|-----------|
| 20 | 1  | 0 | -5.340232 | 2.030818  | -0.119289 |
| 21 | 1  | 0 | -2.408887 | 4.743144  | -2.824834 |
| 22 | 1  | 0 | -4.396040 | 3.665956  | -1.789316 |
| 23 | 6  | 0 | -4.328072 | 1.780815  | 0.186979  |
| 24 | 1  | 0 | 0.194749  | 2.428390  | -0.289048 |
| 25 | 1  | 0 | -0.123126 | 4.117856  | -2.058918 |
| 26 | 6  | 0 | -2.784180 | 0.461072  | 1.537594  |
| 27 | 6  | 0 | -4.113605 | 0.853523  | 1.163300  |
| 28 | 1  | 0 | -4.943904 | 0.352753  | 1.648241  |
| 29 | 7  | 0 | -1.758280 | 1.101511  | 0.924062  |
| 30 | 6  | 0 | -2.598657 | -0.540262 | 2.526969  |
| 31 | 1  | 0 | -3.523763 | -0.921103 | 2.953119  |
| 32 | 6  | 0 | -1.391615 | -1.057106 | 3.013343  |
| 33 | 1  | 0 | -0.448314 | -0.594400 | 2.735972  |
| 34 | 1  | 0 | -1.413724 | -1.485756 | 4.012279  |
| 35 | 6  | 0 | 4.745138  | 0.444331  | 0.246425  |
| 36 | 6  | 0 | 5.883353  | 0.767030  | 1.002491  |
| 37 | 6  | 0 | 5.955345  | 1.947089  | 1.739958  |
| 38 | 6  | 0 | 4.875378  | 2.833302  | 1.740325  |
| 39 | 6  | 0 | 3.733653  | 2.535840  | 0.998565  |
| 40 | 6  | 0 | 3.673858  | 1.358216  | 0.255499  |
| 41 | 6  | 0 | 4.680729  | -0.805376 | -0.545290 |
| 42 | 6  | 0 | 5.778990  | -1.243487 | -1.302334 |
| 43 | 6  | 0 | 5.729131  | -2.425295 | -2.038910 |
| 44 | 6  | 0 | 4.564279  | -3.196413 | -2.038309 |
| 45 | 6  | 0 | 3.459594  | -2.783237 | -1.295773 |
| 46 | 6  | 0 | 3.521965  | -1.605230 | -0.553788 |
| 47 | 1  | 0 | 6.712022  | 0.064352  | 1.021385  |
| 48 | 1  | 0 | 6.846168  | 2.168481  | 2.321207  |
| 49 | 1  | 0 | 4.919514  | 3.752158  | 2.318805  |
| 50 | 1  | 0 | 2.879231  | 3.204267  | 0.974888  |
| 51 | 1  | 0 | 6.674979  | -0.629073 | -1.323008 |
| 52 | 1  | 0 | 6.591851  | -2.736463 | -2.621373 |
| 53 | 1  | 0 | 4.513300  | -4.114564 | -2.617241 |
| 54 | 1  | 0 | 2.540144  | -3.359161 | -1.273041 |
| 55 | 8  | 0 | 2.573566  | 1.141474  | -0.551369 |
| 56 | 8  | 0 | 2.450290  | -1.276315 | 0.255099  |
| 57 | 15 | 0 | 1.450516  | -0.009209 | -0.146869 |
| 58 | 8  | 0 | 0.798098  | 0.377011  | 1.168110  |
| 59 | 8  | 0 | 0.632316  | -0.287335 | -1.362581 |
| 60 | 6  | 0 | -6.962456 | -1.675041 | 0.045185  |
| 61 | 1  | 0 | -7.431147 | -2.048169 | -0.868656 |
| 62 | 1  | 0 | -7.296216 | -2.246262 | 0.911777  |
| 63 | 1  | 0 | -7.207659 | -0.615600 | 0.164147  |
| 64 | 6  | 0 | -1.468356 | -2.199113 | -0.142206 |
| 65 | 1  | 0 | -0.954258 | -1.775768 | -1.002812 |

-----  
***s-cis\_TS-Tt(R-ex)***

B3LYP-D3/6-31g(d) in gas phase

SCF Done: E(RB3LYP) = -2023.700029 hartree

Sum of electronic and thermal Free Energies = -2023.251630 hartree

The number of imaginary frequency = 1

Imaginary frequency = -332.94

-----  
Center Atomic Atomic Coordinates (Angstroms)

| Number | Number | Type | X         | Y         | Z         |
|--------|--------|------|-----------|-----------|-----------|
| 1      | 6      | 0    | -1.131836 | 3.811641  | -1.160957 |
| 2      | 1      | 0    | -0.484575 | 3.047182  | -0.736112 |
| 3      | 1      | 0    | -0.655852 | 4.477145  | -1.877526 |
| 4      | 6      | 0    | -2.177649 | 4.327670  | -0.396147 |
| 5      | 1      | 0    | -2.588441 | 5.299704  | -0.667904 |
| 6      | 6      | 0    | -2.538599 | 2.329260  | 0.969297  |
| 7      | 1      | 0    | -1.606971 | 1.867229  | 0.647913  |
| 8      | 1      | 0    | -4.134292 | 1.944430  | 2.235876  |
| 9      | 7      | 0    | -3.269653 | 1.583615  | 1.850814  |
| 10     | 6      | 0    | -2.935797 | 0.311615  | 2.335591  |
| 11     | 8      | 0    | -1.799305 | -0.116960 | 1.789037  |
| 12     | 8      | 0    | -3.624480 | -0.271203 | 3.147311  |
| 13     | 1      | 0    | -1.221430 | -0.175500 | -1.727285 |
| 14     | 6      | 0    | -2.473416 | -4.341234 | 0.108726  |
| 15     | 6      | 0    | -3.553115 | -3.483606 | 0.216024  |
| 16     | 6      | 0    | -3.477718 | -2.171667 | -0.298021 |
| 17     | 6      | 0    | -2.274198 | -1.739837 | -0.914767 |
| 18     | 6      | 0    | -1.177354 | -2.619099 | -1.025993 |
| 19     | 6      | 0    | -1.289842 | -3.902243 | -0.520243 |
| 20     | 1      | 0    | -5.481703 | -1.534348 | 0.251700  |
| 21     | 1      | 0    | -2.535627 | -5.350709 | 0.503499  |
| 22     | 1      | 0    | -4.473244 | -3.804990 | 0.696905  |
| 23     | 6      | 0    | -4.554436 | -1.234443 | -0.229149 |
| 24     | 1      | 0    | -0.267825 | -2.264654 | -1.498104 |
| 25     | 1      | 0    | -0.449149 | -4.584435 | -0.611222 |
| 26     | 6      | 0    | -3.190354 | 0.449541  | -1.354815 |
| 27     | 6      | 0    | -4.421012 | 0.016409  | -0.750665 |
| 28     | 1      | 0    | -5.235552 | 0.730515  | -0.699416 |
| 29     | 7      | 0    | -2.184348 | -0.459294 | -1.411497 |
| 30     | 6      | 0    | -3.094266 | 1.757698  | -1.884154 |
| 31     | 1      | 0    | -4.021154 | 2.320294  | -1.820871 |
| 32     | 6      | 0    | -1.997029 | 2.398631  | -2.468828 |
| 33     | 1      | 0    | -1.078300 | 1.843385  | -2.644755 |
| 34     | 1      | 0    | -2.214014 | 3.168558  | -3.201738 |
| 35     | 6      | 0    | 4.011808  | -0.981904 | 0.026323  |
| 36     | 6      | 0    | 5.075846  | -1.868523 | -0.207955 |
| 37     | 6      | 0    | 4.861280  | -3.224646 | -0.443351 |
| 38     | 6      | 0    | 3.558989  | -3.728285 | -0.445697 |
| 39     | 6      | 0    | 2.485175  | -2.869028 | -0.223153 |
| 40     | 6      | 0    | 2.704833  | -1.509678 | -0.000143 |
| 41     | 6      | 0    | 4.271223  | 0.444697  | 0.326218  |
| 42     | 6      | 0    | 5.312063  | 0.828246  | 1.187804  |
| 43     | 6      | 0    | 5.565690  | 2.169763  | 1.465367  |
| 44     | 6      | 0    | 4.771671  | 3.163281  | 0.886530  |
| 45     | 6      | 0    | 3.731869  | 2.808559  | 0.029349  |
| 46     | 6      | 0    | 3.493486  | 1.464482  | -0.249136 |
| 47     | 1      | 0    | 6.087335  | -1.471981 | -0.217089 |
| 48     | 1      | 0    | 5.705579  | -3.882935 | -0.627491 |
| 49     | 1      | 0    | 3.378250  | -4.785512 | -0.620770 |
| 50     | 1      | 0    | 1.464756  | -3.232835 | -0.194059 |
| 51     | 1      | 0    | 5.911569  | 0.054437  | 1.659392  |
| 52     | 1      | 0    | 6.372872  | 2.438594  | 2.141048  |
| 53     | 1      | 0    | 4.958121  | 4.211203  | 1.105062  |
| 54     | 1      | 0    | 3.095742  | 3.552346  | -0.438569 |
| 55     | 8      | 0    | 1.613350  | -0.723975 | 0.310982  |

|    |    |   |           |           |           |
|----|----|---|-----------|-----------|-----------|
| 56 | 8  | 0 | 2.520025  | 1.140051  | -1.175938 |
| 57 | 15 | 0 | 1.082027  | 0.524814  | -0.657405 |
| 58 | 8  | 0 | 0.411002  | -0.014300 | -1.903708 |
| 59 | 8  | 0 | 0.351623  | 1.462065  | 0.252303  |
| 60 | 6  | 0 | -1.232431 | -1.329039 | 2.324582  |
| 61 | 1  | 0 | -1.880297 | -2.179086 | 2.100480  |
| 62 | 1  | 0 | -0.269786 | -1.421774 | 1.824226  |
| 63 | 1  | 0 | -1.107460 | -1.234388 | 3.406249  |
| 64 | 6  | 0 | -2.880416 | 3.612993  | 0.597305  |
| 65 | 1  | 0 | -3.765459 | 4.072694  | 1.036887  |

*s-cis\_TS-Tt(S-ex)*

B3LYP-D3/6-31g(d) in gas phase

SCF Done: E(RB3LYP) = -2023.706196 hartree

Sum of electronic and thermal Free Energies = -2023.255047 hartree

The number of imaginary frequency = 1

Imaginary frequency = -366.00

| Center Number | Atomic Number | Atomic Type | Coordinates (Angstroms) |           |           |
|---------------|---------------|-------------|-------------------------|-----------|-----------|
|               |               |             | X                       | Y         | Z         |
| 1             | 6             | 0           | 2.873915                | 2.512515  | -1.489427 |
| 2             | 1             | 0           | 1.868627                | 2.311816  | -1.143644 |
| 3             | 1             | 0           | 2.898128                | 3.260459  | -2.276450 |
| 4             | 6             | 0           | 3.940134                | 2.454705  | -0.588673 |
| 5             | 1             | 0           | 4.846868                | 3.012089  | -0.818804 |
| 6             | 6             | 0           | 2.976046                | 0.722162  | 0.845976  |
| 7             | 1             | 0           | 2.003143                | 0.776339  | 0.375852  |
| 8             | 1             | 0           | 3.929667                | -0.304028 | 2.369233  |
| 9             | 7             | 0           | 3.059633                | -0.189373 | 1.863506  |
| 10            | 6             | 0           | 2.013526                | -0.950943 | 2.394172  |
| 11            | 8             | 0           | 0.880218                | -0.743201 | 1.719060  |
| 12            | 8             | 0           | 2.171428                | -1.684770 | 3.347131  |
| 13            | 1             | 0           | 0.594028                | -0.549770 | -2.021621 |
| 14            | 6             | 0           | -1.476240               | -4.245271 | 0.069952  |
| 15            | 6             | 0           | -0.115849               | -4.336634 | 0.296801  |
| 16            | 6             | 0           | 0.763149                | -3.368183 | -0.234545 |
| 17            | 6             | 0           | 0.228983                | -2.299528 | -1.003332 |
| 18            | 6             | 0           | -1.158315               | -2.215940 | -1.237665 |
| 19            | 6             | 0           | -1.990800               | -3.181848 | -0.701425 |
| 20            | 1             | 0           | 2.609880                | -4.194038 | 0.559144  |
| 21            | 1             | 0           | -2.149972               | -4.990072 | 0.482918  |
| 22            | 1             | 0           | 0.297493                | -5.149955 | 0.887904  |
| 23            | 6             | 0           | 2.176077                | -3.391856 | -0.032255 |
| 24            | 1             | 0           | -1.546686               | -1.391300 | -1.823675 |
| 25            | 1             | 0           | -3.058834               | -3.104174 | -0.872163 |
| 26            | 6             | 0           | 2.415333                | -1.335633 | -1.325464 |
| 27            | 6             | 0           | 2.969686                | -2.418423 | -0.560331 |
| 28            | 1             | 0           | 4.042447                | -2.428127 | -0.402639 |
| 29            | 7             | 0           | 1.073686                | -1.343788 | -1.519944 |
| 30            | 6             | 0           | 3.275724                | -0.335889 | -1.843302 |
| 31            | 1             | 0           | 4.324329                | -0.505567 | -1.618070 |
| 32            | 6             | 0           | 2.956951                | 0.795077  | -2.612306 |
| 33            | 1             | 0           | 1.954089                | 0.904172  | -3.019946 |
| 34            | 1             | 0           | 3.744495                | 1.167695  | -3.259756 |

|    |    |   |           |           |           |    |   |   |           |           |           |
|----|----|---|-----------|-----------|-----------|----|---|---|-----------|-----------|-----------|
| 35 | 6  | 0 | -2.002085 | 1.546226  | 1.282597  | 13 | 1 | 0 | 0.948797  | -1.209328 | 0.745824  |
| 36 | 6  | 0 | -2.405120 | 2.047643  | 2.531558  | 14 | 6 | 0 | 5.328812  | -2.926975 | 0.074174  |
| 37 | 6  | 0 | -1.551855 | 2.822132  | 3.314415  | 15 | 6 | 0 | 5.421556  | -1.797135 | 0.868587  |
| 38 | 6  | 0 | -0.271532 | 3.130204  | 2.847558  | 16 | 6 | 0 | 4.263120  | -1.080690 | 1.231536  |
| 39 | 6  | 0 | 0.151037  | 2.649036  | 1.610347  | 17 | 6 | 0 | 3.005585  | -1.543206 | 0.766854  |
| 40 | 6  | 0 | -0.698508 | 1.850539  | 0.843335  | 18 | 6 | 0 | 2.911547  | -2.686311 | -0.050900 |
| 41 | 6  | 0 | -2.917819 | 0.716554  | 0.466696  | 19 | 6 | 0 | 4.068971  | -3.367767 | -0.384615 |
| 42 | 6  | 0 | -3.736224 | -0.258170 | 1.062330  | 20 | 1 | 0 | 5.225305  | 0.476839  | 2.400226  |
| 43 | 6  | 0 | -4.635477 | -1.014022 | 0.312936  | 21 | 1 | 0 | 6.225171  | -3.474842 | -0.200604 |
| 44 | 6  | 0 | -4.727553 | -0.814891 | -1.067431 | 22 | 1 | 0 | 6.388091  | -1.444470 | 1.218882  |
| 45 | 6  | 0 | -3.919731 | 0.138390  | -1.685900 | 23 | 6 | 0 | 4.271664  | 0.099535  | 2.040403  |
| 46 | 6  | 0 | -3.029073 | 0.900035  | -0.927396 | 24 | 1 | 0 | 1.933886  | -3.002897 | -0.402245 |
| 47 | 1  | 0 | -3.414938 | 1.841276  | 2.875353  | 25 | 1 | 0 | 4.005122  | -4.251670 | -1.012792 |
| 48 | 1  | 0 | -1.892162 | 3.201386  | 4.273757  | 26 | 6 | 0 | 1.850515  | 0.259792  | 1.886364  |
| 49 | 1  | 0 | 0.394815  | 3.749941  | 3.441300  | 27 | 6 | 0 | 3.115554  | 0.748769  | 2.354695  |
| 50 | 1  | 0 | 1.137095  | 2.883117  | 1.223665  | 28 | 1 | 0 | 3.132336  | 1.642379  | 2.966255  |
| 51 | 1  | 0 | -3.653306 | -0.424439 | 2.133134  | 29 | 7 | 0 | 1.871032  | -0.856581 | 1.114058  |
| 52 | 1  | 0 | -5.257003 | -1.758295 | 0.803117  | 30 | 6 | 0 | 0.578751  | 0.798410  | 2.216299  |
| 53 | 1  | 0 | -5.426729 | -1.397371 | -1.661514 | 31 | 1 | 0 | -0.280814 | 0.256031  | 1.835707  |
| 54 | 1  | 0 | -3.969809 | 0.324531  | -2.753544 | 32 | 6 | 0 | 0.347426  | 1.945971  | 2.965321  |
| 55 | 8  | 0 | -0.206899 | 1.268319  | -0.303495 | 33 | 1 | 0 | 1.155449  | 2.436059  | 3.499657  |
| 56 | 8  | 0 | -2.333156 | 1.906545  | -1.553709 | 34 | 1 | 0 | -0.624138 | 2.049106  | 3.439008  |
| 57 | 15 | 0 | -0.703950 | 1.781050  | -1.838841 | 35 | 6 | 0 | -4.484122 | -0.965615 | 0.209533  |
| 58 | 8  | 0 | -0.170952 | 3.130919  | -2.144055 | 36 | 6 | 0 | -5.487344 | -1.327188 | 1.122944  |
| 59 | 8  | 0 | -0.408100 | 0.558979  | -2.687327 | 37 | 6 | 0 | -5.624166 | -2.640784 | 1.566738  |
| 60 | 6  | 0 | -0.310484 | -1.341292 | 2.270366  | 38 | 6 | 0 | -4.748291 | -3.626624 | 1.104847  |
| 61 | 1  | 0 | -0.612333 | -0.788635 | 3.163775  | 39 | 6 | 0 | -3.743763 | -3.293949 | 0.197840  |
| 62 | 1  | 0 | -1.062016 | -1.244816 | 1.490114  | 40 | 6 | 0 | -3.621330 | -1.979563 | -0.246532 |
| 63 | 1  | 0 | -0.130118 | -2.389086 | 2.512527  | 41 | 6 | 0 | -4.350418 | 0.426422  | -0.276070 |
| 64 | 6  | 0 | 4.001350  | 1.584195  | 0.517142  | 42 | 6 | 0 | -5.478080 | 1.181786  | -0.634167 |
| 65 | 1  | 0 | 4.923035  | 1.543581  | 1.096475  | 43 | 6 | 0 | -5.359941 | 2.491359  | -1.095910 |

(R=Me)

*TS<sub>Me-Cc(R-en)</sub>*

B3LYP-D3/6-31g(d) in gas phase

SCF Done: E(RB3LYP) = -2063.028159 hartree

Sum of electronic and thermal Free Energies = -2062.553752 hartree

The number of imaginary frequency = 1

Imaginary frequency = -340.27

| Center Number | Atomic Number | Atomic Type | Coordinates (Angstroms) |           |           |
|---------------|---------------|-------------|-------------------------|-----------|-----------|
|               |               |             | X                       | Y         | Z         |
| 1             | 6             | 0           | -0.160605               | 3.517073  | 1.634478  |
| 2             | 1             | 0           | -0.909988               | 2.894865  | 1.156744  |
| 3             | 1             | 0           | -0.566232               | 4.245745  | 2.332053  |
| 4             | 6             | 0           | 1.028980                | 3.834169  | 0.989989  |
| 5             | 1             | 0           | 1.583641                | 4.683736  | 1.388718  |
| 6             | 6             | 0           | 1.087865                | 1.969543  | -0.545021 |
| 7             | 1             | 0           | 0.046610                | 1.781775  | -0.311157 |
| 8             | 1             | 0           | 0.806811                | 0.450792  | -1.860240 |
| 9             | 7             | 0           | 1.551875                | 1.048650  | -1.440917 |
| 10            | 6             | 0           | 2.857683                | 0.640031  | -1.656873 |
| 11            | 8             | 0           | 2.871807                | -0.223330 | -2.693181 |
| 12            | 8             | 0           | 3.838857                | 0.954529  | -1.010699 |

|    |    |   |           |           |           |
|----|----|---|-----------|-----------|-----------|
| 44 | 6  | 0 | -4.096072 | 3.071267  | -1.223096 |
| 45 | 6  | 0 | -2.959931 | 2.342186  | -0.874829 |
| 46 | 6  | 0 | -3.088183 | 1.039903  | -0.392981 |
| 47 | 1  | 0 | -6.152649 | -0.554869 | 1.499430  |
| 48 | 1  | 0 | -6.405329 | -2.892375 | 2.278667  |
| 49 | 1  | 0 | -4.844247 | -4.651813 | 1.451747  |
| 50 | 1  | 0 | -3.048050 | -4.033430 | -0.183832 |
| 51 | 1  | 0 | -6.457845 | 0.716933  | -0.567388 |
| 52 | 1  | 0 | -6.249647 | 3.050084  | -1.372211 |
| 53 | 1  | 0 | -3.991491 | 4.085270  | -1.599029 |
| 54 | 1  | 0 | -1.967653 | 2.768279  | -0.978688 |
| 55 | 8  | 0 | -2.678584 | -1.695337 | -1.220971 |
| 56 | 8  | 0 | -1.957729 | 0.383001  | 0.059675  |
| 57 | 15 | 0 | -1.305430 | -0.892352 | -0.814785 |
| 58 | 8  | 0 | -0.501592 | -1.677126 | 0.194571  |
| 59 | 8  | 0 | -0.684486 | -0.367601 | -2.074604 |
| 60 | 6  | 0 | 4.162226  | -0.769402 | -3.004634 |
| 61 | 1  | 0 | 4.577848  | -1.297008 | -2.143394 |
| 62 | 1  | 0 | 3.988392  | -1.459537 | -3.830745 |
| 63 | 1  | 0 | 4.850028  | 0.025799  | -3.307196 |
| 64 | 6  | 0 | 1.697160  | 3.101062  | -0.027964 |
| 65 | 6  | 0 | 3.037155  | 3.619456  | -0.499052 |
| 66 | 1  | 0 | 3.869367  | 3.115919  | 0.000949  |
| 67 | 1  | 0 | 3.173965  | 3.455077  | -1.571320 |
| 68 | 1  | 0 | 3.108244  | 4.696104  | -0.309311 |

***TS<sub>Me-Cc(S-en)</sub>***

B3LYP-D3/6-31g(d) in gas phase

SCF Done: E(RB3LYP) = -2063.027155 hartree

Sum of electronic and thermal Free Energies = -2062.553969 hartree

The number of imaginary frequency = 1

Imaginary frequency = -329.00

| Center Number | Atomic Number | Atomic Type | Coordinates (Angstroms) |           |           |
|---------------|---------------|-------------|-------------------------|-----------|-----------|
|               |               |             | X                       | Y         | Z         |
| 1             | 6             | 0           | -0.499912               | 3.502914  | -2.248226 |
| 2             | 1             | 0           | 0.358016                | 2.849206  | -2.127002 |
| 3             | 1             | 0           | -0.248870               | 4.540128  | -2.454700 |
| 4             | 6             | 0           | -1.711839               | 3.017507  | -2.716041 |
| 5             | 1             | 0           | -2.423081               | 3.758749  | -3.081073 |
| 6             | 6             | 0           | -1.385961               | 0.707532  | -2.108946 |
| 7             | 1             | 0           | -0.331072               | 0.921092  | -1.976803 |
| 8             | 1             | 0           | -0.746596               | -1.130097 | -1.621972 |
| 9             | 7             | 0           | -1.624012               | -0.603232 | -1.812825 |
| 10            | 6             | 0           | -2.814278               | -1.227016 | -1.481455 |
| 11            | 8             | 0           | -2.577882               | -2.548419 | -1.334739 |
| 12            | 8             | 0           | -3.896652               | -0.700972 | -1.307304 |
| 13            | 1             | 0           | -0.950824               | -0.085675 | 1.249930  |
| 14            | 6             | 0           | -5.087246               | -1.984793 | 2.575912  |
| 15            | 6             | 0           | -5.334020               | -0.713575 | 2.088115  |
| 16            | 6             | 0           | -4.273642               | 0.092930  | 1.626159  |
| 17            | 6             | 0           | -2.956117               | -0.429782 | 1.669460  |
| 18            | 6             | 0           | -2.704053               | -1.726122 | 2.159866  |
| 19            | 6             | 0           | -3.768137               | -2.486547 | 2.611934  |
| 20            | 1             | 0           | -5.441608               | 1.833164  | 1.057222  |
| 21            | 1             | 0           | -5.908126               | -2.600041 | 2.931919  |
| 22            | 1             | 0           | -6.346932               | -0.321299 | 2.051517  |
| 23            | 6             | 0           | -4.439556               | 1.415127  | 1.107262  |
| 24            | 1             | 0           | -1.682597               | -2.095188 | 2.167530  |
| 25            | 1             | 0           | -3.584328               | -3.486028 | 2.995742  |
| 26            | 6             | 0           | -2.045944               | 1.599715  | 0.730981  |
| 27            | 6             | 0           | -3.370521               | 2.144802  | 0.677487  |
| 28            | 1             | 0           | -3.504879               | 3.143460  | 0.280570  |
| 29            | 7             | 0           | -1.916121               | 0.340838  | 1.217760  |
| 30            | 6             | 0           | -0.851144               | 2.280762  | 0.370358  |
| 31            | 1             | 0           | 0.065646                | 1.715597  | 0.492688  |
| 32            | 6             | 0           | -0.759015               | 3.578489  | -0.109925 |
| 33            | 1             | 0           | -1.614488               | 4.245892  | -0.087614 |
| 34            | 1             | 0           | 0.201499                | 4.078824  | -0.032979 |
| 35            | 6             | 0           | -3.728917               | -3.329858 | -0.980429 |
| 36            | 1             | 0           | -4.475521               | -3.291240 | -1.779348 |
| 37            | 1             | 0           | -3.356313               | -4.346961 | -0.854960 |
| 38            | 1             | 0           | -4.174871               | -2.965702 | -0.052573 |
| 39            | 6             | 0           | 4.405161                | 0.540273  | 0.778144  |
| 40            | 6             | 0           | 5.373921                | 1.130344  | 1.605759  |
| 41            | 6             | 0           | 5.079008                | 2.235203  | 2.401495  |
| 42            | 6             | 0           | 3.790343                | 2.772562  | 2.389898  |
| 43            | 6             | 0           | 2.809165                | 2.204807  | 1.579037  |
| 44            | 6             | 0           | 3.113565                | 1.103594  | 0.778633  |
| 45            | 6             | 0           | 4.742350                | -0.623437 | -0.072984 |

|    |    |   |           |           |           |
|----|----|---|-----------|-----------|-----------|
| 46 | 6  | 0 | 5.951754  | -0.679205 | -0.784621 |
| 47 | 6  | 0 | 6.278936  | -1.781036 | -1.571942 |
| 48 | 6  | 0 | 5.392009  | -2.856435 | -1.668438 |
| 49 | 6  | 0 | 4.184717  | -2.825476 | -0.973013 |
| 50 | 6  | 0 | 3.871896  | -1.722679 | -0.181903 |
| 51 | 1  | 0 | 6.368556  | 0.693980  | 1.632526  |
| 52 | 1  | 0 | 5.847844  | 2.666055  | 3.036641  |
| 53 | 1  | 0 | 3.545956  | 3.628473  | 3.013225  |
| 54 | 1  | 0 | 1.800931  | 2.604500  | 1.557433  |
| 55 | 1  | 0 | 6.629313  | 0.168452  | -0.729236 |
| 56 | 1  | 0 | 7.218221  | -1.795473 | -2.117743 |
| 57 | 1  | 0 | 5.636747  | -3.715603 | -2.286879 |
| 58 | 1  | 0 | 3.472376  | -3.641856 | -1.024003 |
| 59 | 8  | 0 | 2.147783  | 0.637567  | -0.095008 |
| 60 | 8  | 0 | 2.712149  | -1.756740 | 0.574987  |
| 61 | 15 | 0 | 1.421966  | -0.851974 | 0.113146  |
| 62 | 8  | 0 | 0.496933  | -0.797418 | 1.305198  |
| 63 | 8  | 0 | 0.918641  | -1.240813 | -1.247548 |
| 64 | 6  | 0 | -2.210465 | 1.688244  | -2.635607 |
| 65 | 6  | 0 | -3.614571 | 1.436297  | -3.137235 |
| 66 | 1  | 0 | -3.698395 | 0.460500  | -3.621715 |
| 67 | 1  | 0 | -4.346907 | 1.443040  | -2.324657 |
| 68 | 1  | 0 | -3.890974 | 2.203939  | -3.868507 |

***TS<sub>Me-Ct(R-en)</sub>***

B3LYP-D3/6-31g(d) in gas phase

SCF Done: E(RB3LYP) = -2063.021822 hartree

Sum of electronic and thermal Free Energies = -2062.547342 hartree

The number of imaginary frequency = 1

Imaginary frequency = -335.28

| Center Number | Atomic Number | Atomic Type | Coordinates (Angstroms) |           |           |
|---------------|---------------|-------------|-------------------------|-----------|-----------|
|               |               |             | X                       | Y         | Z         |
| 1             | 6             | 0           | -0.085618               | 3.408101  | 1.697747  |
| 2             | 1             | 0           | -0.855071               | 2.833282  | 1.193918  |
| 3             | 1             | 0           | -0.464855               | 4.108991  | 2.437208  |
| 4             | 6             | 0           | 1.109721                | 3.722323  | 1.064081  |
| 5             | 1             | 0           | 1.690721                | 4.533504  | 1.503608  |
| 6             | 6             | 0           | 1.104491                | 1.946099  | -0.573610 |
| 7             | 1             | 0           | 0.059030                | 1.787638  | -0.333624 |
| 8             | 1             | 0           | 0.711911                | 0.536808  | -1.969658 |
| 9             | 7             | 0           | 1.503233                | 1.055585  | -1.528600 |
| 10            | 6             | 0           | 2.744771                | 0.563840  | -1.907294 |
| 11            | 8             | 0           | 3.732805                | 0.909588  | -1.053627 |
| 12            | 8             | 0           | 2.897963                | -0.146928 | -2.877723 |
| 13            | 1             | 0           | 0.945270                | -1.245058 | 0.495161  |
| 14            | 6             | 0           | 5.292302                | -3.090769 | -0.100704 |
| 15            | 6             | 0           | 5.378056                | -2.062727 | 0.822184  |
| 16            | 6             | 0           | 4.233372                | -1.314942 | 1.167296  |
| 17            | 6             | 0           | 2.991548                | -1.655683 | 0.570158  |
| 18            | 6             | 0           | 2.908855                | -2.692116 | -0.379797 |
| 19            | 6             | 0           | 4.055007                | -3.395461 | -0.706457 |
| 20            | 1             | 0           | 5.188926                | 0.088614  | 2.523712  |
| 21            | 1             | 0           | 6.178021                | -3.659548 | -0.366971 |

|    |    |   |           |           |           | Center | Atomic | Atomic | Coordinates (Angstroms) |           |           |
|----|----|---|-----------|-----------|-----------|--------|--------|--------|-------------------------|-----------|-----------|
|    |    |   |           |           |           | Number | Number | Type   | X                       | Y         | Z         |
| 22 | 1  | 0 | 6.329625  | -1.809624 | 1.283202  |        |        |        |                         |           |           |
| 23 | 6  | 0 | 4.245743  | -0.202321 | 2.067422  |        |        |        |                         |           |           |
| 24 | 1  | 0 | 1.949609  | -2.910824 | -0.839114 |        |        |        |                         |           |           |
| 25 | 1  | 0 | 3.999031  | -4.191545 | -1.442801 | 1      | 6      | 0      | -0.883000               | 3.585553  | -2.237758 |
| 26 | 6  | 0 | 1.847216  | 0.089099  | 1.788588  | 2      | 1      | 0      | 0.031387                | 3.001749  | -2.261710 |
| 27 | 6  | 0 | 3.105197  | 0.486578  | 2.354334  | 3      | 1      | 0      | -0.740450               | 4.651085  | -2.397236 |
| 28 | 1  | 0 | 3.124393  | 1.325851  | 3.038469  | 4      | 6      | 0      | -2.099469               | 3.026249  | -2.596799 |
| 29 | 7  | 0 | 1.866432  | -0.953470 | 0.918837  | 5      | 1      | 0      | -2.902814               | 3.725051  | -2.831834 |
| 30 | 6  | 0 | 0.582929  | 0.638757  | 2.126570  | 6      | 6      | 0      | -1.531410               | 0.725312  | -2.169358 |
| 31 | 1  | 0 | -0.281881 | 0.145717  | 1.695842  | 7      | 1      | 0      | -0.495217               | 1.041932  | -2.124143 |
| 32 | 6  | 0 | 0.365921  | 1.741248  | 2.943351  | 8      | 1      | 0      | -0.631193               | -1.028307 | -1.852560 |
| 33 | 1  | 0 | 1.174659  | 2.181422  | 3.518546  | 9      | 7      | 0      | -1.584013               | -0.616076 | -1.928101 |
| 34 | 1  | 0 | -0.612469 | 1.842430  | 3.402829  | 10     | 6      | 0      | -2.589045               | -1.498286 | -1.557506 |
| 35 | 6  | 0 | 5.045714  | 0.508439  | -1.479728 | 11     | 8      | 0      | -3.757075               | -0.886986 | -1.271875 |
| 36 | 1  | 0 | 5.088747  | -0.572063 | -1.624311 | 12     | 8      | 0      | -2.401306               | -2.693190 | -1.464395 |
| 37 | 1  | 0 | 5.312074  | 1.012802  | -2.413174 | 13     | 1      | 0      | -0.863172               | -0.258273 | 1.035905  |
| 38 | 1  | 0 | 5.714019  | 0.813594  | -0.674264 | 14     | 6      | 0      | -4.806752               | -2.268537 | 2.735943  |
| 39 | 6  | 0 | -4.412267 | 0.450050  | -0.158811 | 15     | 6      | 0      | -5.106357               | -0.961813 | 2.393151  |
| 40 | 6  | 0 | -5.560474 | 1.219538  | -0.403416 | 16     | 6      | 0      | -4.116527               | -0.125853 | 1.834744  |
| 41 | 6  | 0 | -5.472253 | 2.561017  | -0.770774 | 17     | 6      | 0      | -2.809729               | -0.648085 | 1.649848  |
| 42 | 6  | 0 | -4.219402 | 3.160270  | -0.916830 | 18     | 6      | 0      | -2.510269               | -1.984645 | 1.980912  |
| 43 | 6  | 0 | -3.063512 | 2.417762  | -0.679648 | 19     | 6      | 0      | -3.507903               | -2.777681 | 2.520289  |
| 44 | 6  | 0 | -3.161128 | 1.082848  | -0.289235 | 20     | 1      | 0      | -5.346473               | 1.639461  | 1.530527  |
| 45 | 6  | 0 | -4.512227 | -0.976947 | 0.222066  | 21     | 1      | 0      | -5.572377               | -2.908280 | 3.164409  |
| 46 | 6  | 0 | -5.466715 | -1.419910 | 1.151667  | 22     | 1      | 0      | -6.107125               | -0.564338 | 2.542965  |
| 47 | 6  | 0 | -5.572392 | -2.765702 | 1.496534  | 23     | 6      | 0      | -4.348436               | 1.222729  | 1.418405  |
| 48 | 6  | 0 | -4.713563 | -3.702718 | 0.916188  | 24     | 1      | 0      | -1.506615               | -2.357852 | 1.801302  |
| 49 | 6  | 0 | -3.757280 | -3.289165 | -0.009535 | 25     | 1      | 0      | -3.286089               | -3.808984 | 2.778074  |
| 50 | 6  | 0 | -3.665860 | -1.942691 | -0.354127 | 26     | 6      | 0      | -2.018278               | 1.451958  | 0.761062  |
| 51 | 1  | 0 | -6.533157 | 0.741833  | -0.324834 | 27     | 6      | 0      | -3.344577               | 1.982162  | 0.892824  |
| 52 | 1  | 0 | -6.377548 | 3.130583  | -0.960860 | 28     | 1      | 0      | -3.530111               | 3.001909  | 0.579208  |
| 53 | 1  | 0 | -4.139359 | 4.199883  | -1.222232 | 29     | 7      | 0      | -1.830840               | 0.162229  | 1.133237  |
| 54 | 1  | 0 | -2.079095 | 2.857212  | -0.801983 | 30     | 6      | 0      | -0.879034               | 2.187970  | 0.332187  |
| 55 | 1  | 0 | -6.118261 | -0.686749 | 1.619493  | 31     | 1      | 0      | 0.063918                | 1.652703  | 0.330801  |
| 56 | 1  | 0 | -6.315923 | -3.080884 | 2.223302  | 32     | 6      | 0      | -0.875236               | 3.514456  | -0.071678 |
| 57 | 1  | 0 | -4.785442 | -4.753014 | 1.185031  | 33     | 1      | 0      | -1.739573               | 4.151687  | 0.083532  |
| 58 | 1  | 0 | -3.076589 | -3.988932 | -0.482305 | 34     | 1      | 0      | 0.074514                | 4.039872  | -0.074358 |
| 59 | 8  | 0 | -2.006755 | 0.403672  | 0.057488  | 35     | 6      | 0      | -4.842771               | -1.786272 | -0.988648 |
| 60 | 8  | 0 | -2.774477 | -1.573463 | -1.348226 | 36     | 1      | 0      | -5.057561               | -2.408271 | -1.862237 |
| 61 | 15 | 0 | -1.389277 | -0.787826 | -0.950961 | 37     | 1      | 0      | -4.599049               | -2.424364 | -0.138183 |
| 62 | 8  | 0 | -0.839187 | -0.150517 | -2.191147 | 38     | 1      | 0      | -5.692084               | -1.144506 | -0.754370 |
| 63 | 8  | 0 | -0.524879 | -1.639610 | -0.051946 | 39     | 6      | 0      | 4.400381                | 0.483419  | 0.960614  |
| 64 | 6  | 0 | 1.751588  | 3.028268  | 0.002072  | 40     | 6      | 0      | 5.277966                | 0.905321  | 1.972098  |
| 65 | 6  | 0 | 3.099364  | 3.548266  | -0.446664 | 41     | 6      | 0      | 4.879516                | 1.814952  | 2.949488  |
| 66 | 1  | 0 | 3.925175  | 3.064329  | 0.085359  | 42     | 6      | 0      | 3.577889                | 2.320878  | 2.937357  |
| 67 | 1  | 0 | 3.261942  | 3.379674  | -1.514234 | 43     | 6      | 0      | 2.685817                | 1.917312  | 1.945286  |
| 68 | 1  | 0 | 3.159629  | 4.626604  | -0.262873 | 44     | 6      | 0      | 3.095150                | 1.012665  | 0.966305  |
|    |    |   |           |           |           | 45     | 6      | 0      | 4.841122                | -0.470076 | -0.083094 |
|    |    |   |           |           |           | 46     | 6      | 0      | 6.102373                | -0.352833 | -0.689287 |
|    |    |   |           |           |           | 47     | 6      | 0      | 6.525852                | -1.255809 | -1.662119 |
|    |    |   |           |           |           | 48     | 6      | 0      | 5.685579                | -2.300415 | -2.055815 |
|    |    |   |           |           |           | 49     | 6      | 0      | 4.428504                | -2.439081 | -1.470261 |
|    |    |   |           |           |           | 50     | 6      | 0      | 4.018749                | -1.535656 | -0.492511 |
|    |    |   |           |           |           | 51     | 1      | 0      | 6.282194                | 0.491190  | 1.994499  |
|    |    |   |           |           |           | 52     | 1      | 0      | 5.578467                | 2.117912  | 3.724033  |
|    |    |   |           |           |           | 53     | 1      | 0      | 3.254804                | 3.024392  | 3.699955  |
|    |    |   |           |           |           | 54     | 1      | 0      | 1.669400                | 2.296040  | 1.912905  |

-----

***TS<sub>Me-Ct(S-en)</sub>***  
B3LYP-D3/6-31g(d) in gas phase  
SCF Done: E(RB3LYP) = -2063.021633 hartree  
Sum of electronic and thermal Free Energies = -2062.547486 hartree  
The number of imaginary frequency = 1  
Imaginary frequency = -323.58  
-----

|    |    |   |           |           |           |
|----|----|---|-----------|-----------|-----------|
| 55 | 1  | 0 | 6.744595  | 0.474868  | -0.400841 |
| 56 | 1  | 0 | 7.504077  | -1.137815 | -2.119876 |
| 57 | 1  | 0 | 6.005574  | -3.003964 | -2.819452 |
| 58 | 1  | 0 | 3.750941  | -3.238862 | -1.749268 |
| 59 | 8  | 0 | 2.221108  | 0.715085  | -0.063870 |
| 60 | 8  | 0 | 2.808962  | -1.755317 | 0.145115  |
| 61 | 15 | 0 | 1.521062  | -0.793228 | -0.185480 |
| 62 | 8  | 0 | 0.550817  | -0.988029 | 0.955612  |
| 63 | 8  | 0 | 1.068895  | -0.905105 | -1.613835 |
| 64 | 6  | 0 | -2.484576 | 1.657124  | -2.551545 |
| 65 | 6  | 0 | -3.912118 | 1.331179  | -2.930681 |
| 66 | 1  | 0 | -3.987109 | 0.364177  | -3.432870 |
| 67 | 1  | 0 | -4.569267 | 1.291060  | -2.055149 |
| 68 | 1  | 0 | -4.297216 | 2.097241  | -3.612541 |

-----

***TS<sub>Me-Tc(R-ex)</sub>***

B3LYP-D3/6-31g(d) in gas phase

SCF Done: E(RB3LYP) = -2063.036231 hartree

Sum of electronic and thermal Free Energies = -2062.562251 hartree

The number of imaginary frequency = 1

Imaginary frequency = -340.04

| Center Number | Atomic Number | Atomic Type | Coordinates (Angstroms) |           |           |
|---------------|---------------|-------------|-------------------------|-----------|-----------|
|               |               |             | X                       | Y         | Z         |
| 1             | 6             | 0           | -5.213823               | -2.778370 | 0.214728  |
| 2             | 1             | 0           | -5.454525               | -1.724934 | 0.323641  |
| 3             | 1             | 0           | -6.050594               | -3.400883 | -0.091273 |
| 4             | 6             | 0           | -4.196073               | -3.353406 | 0.964057  |
| 5             | 1             | 0           | -4.178619               | -4.441723 | 1.016028  |
| 6             | 6             | 0           | -2.993051               | -1.314640 | 1.428079  |
| 7             | 1             | 0           | -3.868716               | -0.719634 | 1.199961  |
| 8             | 1             | 0           | -0.945416               | -0.986290 | 1.749079  |
| 9             | 7             | 0           | -1.901262               | -0.563563 | 1.743738  |
| 10            | 6             | 0           | -2.012143               | 0.818221  | 1.796103  |
| 11            | 8             | 0           | -0.801966               | 1.369917  | 2.007096  |
| 12            | 8             | 0           | -3.049414               | 1.442447  | 1.665789  |
| 13            | 1             | 0           | -1.025894               | -0.167230 | -1.299061 |
| 14            | 6             | 0           | -1.342272               | 4.571272  | -1.286725 |
| 15            | 6             | 0           | -2.623089               | 4.054473  | -1.363276 |
| 16            | 6             | 0           | -2.828460               | 2.658567  | -1.398823 |
| 17            | 6             | 0           | -1.698292               | 1.802156  | -1.343430 |
| 18            | 6             | 0           | -0.393265               | 2.329479  | -1.262510 |
| 19            | 6             | 0           | -0.230322               | 3.702730  | -1.239771 |
| 20            | 1             | 0           | -4.994895               | 2.681074  | -1.536011 |
| 21            | 1             | 0           | -1.189511               | 5.646098  | -1.262204 |
| 22            | 1             | 0           | -3.486684               | 4.713395  | -1.399274 |
| 23            | 6             | 0           | -4.114714               | 2.044518  | -1.496866 |
| 24            | 1             | 0           | 0.453823                | 1.655358  | -1.199850 |
| 25            | 1             | 0           | 0.772176                | 4.115931  | -1.175669 |
| 26            | 6             | 0           | -3.096880               | -0.162986 | -1.466423 |
| 27            | 6             | 0           | -4.248124               | 0.687665  | -1.540180 |
| 28            | 1             | 0           | -5.228691               | 0.232641  | -1.611418 |
| 29            | 7             | 0           | -1.889104               | 0.442847  | -1.364267 |
| 30            | 6             | 0           | -3.123390               | -1.584795 | -1.491913 |

|    |    |   |           |           |           |
|----|----|---|-----------|-----------|-----------|
| 31 | 1  | 0 | -2.161013 | -2.072569 | -1.368329 |
| 32 | 6  | 0 | -4.259116 | -2.363578 | -1.684690 |
| 33 | 1  | 0 | -5.171620 | -1.924905 | -2.078986 |
| 34 | 1  | 0 | -4.118866 | -3.405459 | -1.948477 |
| 35 | 6  | 0 | -0.799553 | 2.801631  | 2.141787  |
| 36 | 1  | 0 | -1.233969 | 3.086478  | 3.105065  |
| 37 | 1  | 0 | 0.249646  | 3.092212  | 2.092686  |
| 38 | 1  | 0 | -1.363381 | 3.268882  | 1.333936  |
| 39 | 6  | 0 | 4.323105  | -0.490859 | -0.703062 |
| 40 | 6  | 0 | 5.354048  | -0.105375 | -1.574713 |
| 41 | 6  | 0 | 5.532153  | -0.725932 | -2.809471 |
| 42 | 6  | 0 | 4.668941  | -1.751489 | -3.202968 |
| 43 | 6  | 0 | 3.637450  | -2.154062 | -2.356495 |
| 44 | 6  | 0 | 3.472644  | -1.534664 | -1.119322 |
| 45 | 6  | 0 | 4.145878  | 0.163501  | 0.613184  |
| 46 | 6  | 0 | 5.239055  | 0.458788  | 1.442869  |
| 47 | 6  | 0 | 5.060350  | 1.058391  | 2.688477  |
| 48 | 6  | 0 | 3.772567  | 1.359896  | 3.139783  |
| 49 | 6  | 0 | 2.670099  | 1.080122  | 2.333604  |
| 50 | 6  | 0 | 2.864171  | 0.508726  | 1.078225  |
| 51 | 1  | 0 | 6.009478  | 0.708737  | -1.277032 |
| 52 | 1  | 0 | 6.335086  | -0.403203 | -3.466401 |
| 53 | 1  | 0 | 4.796015  | -2.236168 | -4.167131 |
| 54 | 1  | 0 | 2.952283  | -2.950230 | -2.627498 |
| 55 | 1  | 0 | 6.236706  | 0.186453  | 1.109355  |
| 56 | 1  | 0 | 5.922682  | 1.269286  | 3.314834  |
| 57 | 1  | 0 | 3.625875  | 1.803660  | 4.120863  |
| 58 | 1  | 0 | 1.653233  | 1.272185  | 2.656020  |
| 59 | 8  | 0 | 2.506049  | -2.032438 | -0.262243 |
| 60 | 8  | 0 | 1.773125  | 0.341138  | 0.243934  |
| 61 | 15 | 0 | 1.133938  | -1.177979 | 0.042436  |
| 62 | 8  | 0 | 0.277010  | -1.076918 | -1.198287 |
| 63 | 8  | 0 | 0.567567  | -1.691270 | 1.335838  |
| 64 | 6  | 0 | -3.058528 | -2.693955 | 1.493233  |
| 65 | 6  | 0 | -1.906845 | -3.501400 | 2.049099  |
| 66 | 1  | 0 | -1.022583 | -3.444186 | 1.406486  |
| 67 | 1  | 0 | -1.592043 | -3.119382 | 3.027454  |
| 68 | 1  | 0 | -2.190583 | -4.551649 | 2.167816  |

-----

***TS<sub>Me-Tc(S-ex)</sub>***

B3LYP-D3/6-31g(d) in gas phase

SCF Done: E(RB3LYP) = -2063.033023 hartree

Sum of electronic and thermal Free Energies = -2062.559024 hartree

The number of imaginary frequency = 1

Imaginary frequency = -342.03

| Center Number | Atomic Number | Atomic Type | Coordinates (Angstroms) |           |           |
|---------------|---------------|-------------|-------------------------|-----------|-----------|
|               |               |             | X                       | Y         | Z         |
| 1             | 6             | 0           | 3.968945                | -3.776307 | -1.431598 |
| 2             | 1             | 0           | 4.626305                | -3.111976 | -0.878845 |
| 3             | 1             | 0           | 4.487040                | -4.474817 | -2.083716 |
| 4             | 6             | 0           | 2.733851                | -4.146760 | -0.909908 |
| 5             | 1             | 0           | 2.244691                | -5.005277 | -1.370180 |
| 6             | 6             | 0           | 2.491741                | -2.287143 | 0.601531  |



|    |    |   |           |           |           |
|----|----|---|-----------|-----------|-----------|
| 7  | 1  | 0 | 3.555750  | -2.095021 | 0.537076  |
| 8  | 1  | 0 | 0.799643  | -1.345733 | 1.456843  |
| 9  | 7  | 0 | 1.844869  | -1.391941 | 1.388759  |
| 10 | 6  | 0 | 2.565058  | -0.375458 | 2.006437  |
| 11 | 8  | 0 | 1.726716  | 0.416789  | 2.692932  |
| 12 | 8  | 0 | 3.770643  | -0.222120 | 1.927943  |
| 13 | 1  | 0 | 1.083740  | 0.280390  | -0.962041 |
| 14 | 6  | 0 | 2.735029  | 4.324322  | 0.944934  |
| 15 | 6  | 0 | 3.799528  | 3.634177  | 0.391673  |
| 16 | 6  | 0 | 3.594174  | 2.391140  | -0.243714 |
| 17 | 6  | 0 | 2.276870  | 1.867565  | -0.307473 |
| 18 | 6  | 0 | 1.197626  | 2.560662  | 0.277758  |
| 19 | 6  | 0 | 1.434992  | 3.778950  | 0.889198  |
| 20 | 1  | 0 | 5.659015  | 1.991328  | -0.786469 |
| 21 | 1  | 0 | 2.899428  | 5.281479  | 1.430551  |
| 22 | 1  | 0 | 4.807431  | 4.038202  | 0.439847  |
| 23 | 6  | 0 | 4.640471  | 1.615110  | -0.835366 |
| 24 | 1  | 0 | 0.204196  | 2.125060  | 0.259062  |
| 25 | 1  | 0 | 0.605413  | 4.315504  | 1.340456  |
| 26 | 6  | 0 | 3.038044  | -0.079818 | -1.523150 |
| 27 | 6  | 0 | 4.377920  | 0.427302  | -1.449799 |
| 28 | 1  | 0 | 5.177685  | -0.149965 | -1.897818 |
| 29 | 7  | 0 | 2.066393  | 0.665767  | -0.935182 |
| 30 | 6  | 0 | 2.638302  | -1.271863 | -2.179499 |
| 31 | 1  | 0 | 1.570479  | -1.467006 | -2.171611 |
| 32 | 6  | 0 | 3.477353  | -2.190794 | -2.804232 |
| 33 | 1  | 0 | 4.518688  | -1.949002 | -3.001269 |
| 34 | 1  | 0 | 3.035237  | -2.862799 | -3.530892 |
| 35 | 6  | 0 | 2.358147  | 1.485637  | 3.415182  |
| 36 | 1  | 0 | 2.949790  | 2.110049  | 2.743308  |
| 37 | 1  | 0 | 1.539214  | 2.059397  | 3.848548  |
| 38 | 1  | 0 | 3.003989  | 1.081851  | 4.200580  |
| 39 | 6  | 0 | -4.187128 | 0.995593  | -0.686500 |
| 40 | 6  | 0 | -5.070236 | 1.664434  | -1.549153 |
| 41 | 6  | 0 | -4.672223 | 2.786852  | -2.272321 |
| 42 | 6  | 0 | -3.365124 | 3.263083  | -2.150311 |
| 43 | 6  | 0 | -2.467799 | 2.617031  | -1.301756 |
| 44 | 6  | 0 | -2.876796 | 1.499882  | -0.574866 |
| 45 | 6  | 0 | -4.627571 | -0.189644 | 0.084118  |
| 46 | 6  | 0 | -5.881806 | -0.224635 | 0.714357  |
| 47 | 6  | 0 | -6.304801 | -1.345998 | 1.424976  |
| 48 | 6  | 0 | -5.471216 | -2.462850 | 1.524880  |
| 49 | 6  | 0 | -4.220956 | -2.453283 | 0.909147  |
| 50 | 6  | 0 | -3.811674 | -1.330398 | 0.193856  |
| 51 | 1  | 0 | -6.078795 | 1.276517  | -1.662378 |
| 52 | 1  | 0 | -5.375796 | 3.279851  | -2.937259 |
| 53 | 1  | 0 | -3.041928 | 4.132733  | -2.715975 |
| 54 | 1  | 0 | -1.447986 | 2.969148  | -1.187135 |
| 55 | 1  | 0 | -6.518720 | 0.653866  | 0.657480  |
| 56 | 1  | 0 | -7.277325 | -1.343807 | 1.909232  |
| 57 | 1  | 0 | -5.790892 | -3.337750 | 2.084271  |
| 58 | 1  | 0 | -3.548374 | -3.302643 | 0.964380  |
| 59 | 8  | 0 | -1.993790 | 0.949638  | 0.338472  |
| 60 | 8  | 0 | -2.608604 | -1.382455 | -0.489728 |
| 61 | 15 | 0 | -1.312179 | -0.541238 | 0.075869  |
| 62 | 8  | 0 | -0.344854 | -0.465179 | -1.082499 |
| 63 | 8  | 0 | -0.854788 | -1.045122 | 1.414821  |

|    |   |   |           |           |           |
|----|---|---|-----------|-----------|-----------|
| 64 | 6 | 0 | 1.938606  | -3.400368 | -0.005637 |
| 65 | 6 | 0 | 0.482942  | -3.770731 | 0.173465  |
| 66 | 1 | 0 | 0.093089  | -3.478830 | 1.151514  |
| 67 | 1 | 0 | -0.137993 | -3.264909 | -0.575607 |
| 68 | 1 | 0 | 0.344662  | -4.850591 | 0.052076  |

-----

***TS<sub>Me-Tt(R-ex)</sub>***

B3LYP-D3/6-31g(d) in gas phase

SCF Done: E(RB3LYP) = -2063.032556 hartree

Sum of electronic and thermal Free Energies = -2062.557978 hartree

The number of imaginary frequency = 1

Imaginary frequency = -339.75

-----

| Center Number | Atomic Number | Atomic Type | Coordinates (Angstroms) |           |           |
|---------------|---------------|-------------|-------------------------|-----------|-----------|
|               |               |             | X                       | Y         | Z         |
| 1             | 6             | 0           | -4.917981               | -3.005968 | 0.223965  |
| 2             | 1             | 0           | -5.203249               | -1.957901 | 0.237022  |
| 3             | 1             | 0           | -5.716474               | -3.684273 | -0.065632 |
| 4             | 6             | 0           | -3.916870               | -3.479418 | 1.062431  |
| 5             | 1             | 0           | -3.859140               | -4.559417 | 1.194560  |
| 6             | 6             | 0           | -2.821471               | -1.360294 | 1.457722  |
| 7             | 1             | 0           | -3.710676               | -0.824172 | 1.154658  |
| 8             | 1             | 0           | -0.794434               | -0.971190 | 1.829178  |
| 9             | 7             | 0           | -1.760025               | -0.566559 | 1.776580  |
| 10            | 6             | 0           | -1.790338               | 0.816334  | 1.835377  |
| 11            | 8             | 0           | -3.033040               | 1.311912  | 1.622215  |
| 12            | 8             | 0           | -0.813180               | 1.502116  | 2.057940  |
| 13            | 1             | 0           | -0.907341               | -0.217428 | -1.190968 |
| 14            | 6             | 0           | -1.681387               | 4.486908  | -1.424280 |
| 15            | 6             | 0           | -2.877474               | 3.836593  | -1.668063 |
| 16            | 6             | 0           | -2.941254               | 2.427065  | -1.637208 |
| 17            | 6             | 0           | -1.755065               | 1.693007  | -1.366649 |
| 18            | 6             | 0           | -0.540008               | 2.358605  | -1.106579 |
| 19            | 6             | 0           | -0.517450               | 3.741584  | -1.137878 |
| 20            | 1             | 0           | -5.064918               | 2.223639  | -2.042183 |
| 21            | 1             | 0           | -1.636561               | 5.571647  | -1.445578 |
| 22            | 1             | 0           | -3.783543               | 4.399028  | -1.879100 |
| 23            | 6             | 0           | -4.143433               | 1.682368  | -1.841336 |
| 24            | 1             | 0           | 0.347756                | 1.782979  | -0.865637 |
| 25            | 1             | 0           | 0.414383                | 4.258904  | -0.929845 |
| 26            | 6             | 0           | -2.937866               | -0.407610 | -1.531081 |
| 27            | 6             | 0           | -4.148397               | 0.319478  | -1.783066 |
| 28            | 1             | 0           | -5.067575               | -0.233693 | -1.933134 |
| 29            | 7             | 0           | -1.809450               | 0.320934  | -1.339934 |
| 30            | 6             | 0           | -2.836566               | -1.823624 | -1.467980 |
| 31            | 1             | 0           | -1.847388               | -2.214679 | -1.251659 |
| 32            | 6             | 0           | -3.894491               | -2.707463 | -1.653680 |
| 33            | 1             | 0           | -4.814981               | -2.383849 | -2.131863 |
| 34            | 1             | 0           | -3.657639               | -3.752797 | -1.815717 |
| 35            | 6             | 0           | -3.135968               | 2.739672  | 1.762773  |
| 36            | 1             | 0           | -2.417193               | 3.244971  | 1.116279  |
| 37            | 1             | 0           | -4.156637               | 2.984223  | 1.467306  |
| 38            | 1             | 0           | -2.957057               | 3.029544  | 2.802191  |
| 39            | 6             | 0           | 4.176091                | 0.407251  | 0.614338  |

|    |    |   |           |           |           |    |   |   |           |           |           |
|----|----|---|-----------|-----------|-----------|----|---|---|-----------|-----------|-----------|
| 40 | 6  | 0 | 5.231129  | 0.841663  | 1.432849  | 16 | 6 | 0 | -4.203313 | 1.253124  | 1.421329  |
| 41 | 6  | 0 | 4.989568  | 1.579942  | 2.589974  | 17 | 6 | 0 | -2.956656 | 1.493819  | 0.784885  |
| 42 | 6  | 0 | 3.678248  | 1.894095  | 2.958561  | 18 | 6 | 0 | -2.775203 | 2.617622  | -0.047534 |
| 43 | 6  | 0 | 2.610565  | 1.475265  | 2.165778  | 19 | 6 | 0 | -3.829918 | 3.496272  | -0.217712 |
| 44 | 6  | 0 | 2.869931  | 0.748439  | 1.006848  | 20 | 1 | 0 | -5.264901 | -0.142474 | 2.702205  |
| 45 | 6  | 0 | 4.422361  | -0.359198 | -0.629216 | 21 | 1 | 0 | -5.882464 | 3.988914  | 0.272545  |
| 46 | 6  | 0 | 5.462998  | -0.000424 | -1.501564 | 22 | 1 | 0 | -6.209047 | 1.994036  | 1.715879  |
| 47 | 6  | 0 | 5.709650  | -0.710975 | -2.674368 | 23 | 6 | 0 | -4.318044 | 0.068602  | 2.211038  |
| 48 | 6  | 0 | 4.905496  | -1.803765 | -3.006495 | 24 | 1 | 0 | -1.819923 | 2.755173  | -0.542789 |
| 49 | 6  | 0 | 3.865374  | -2.181503 | -2.159422 | 25 | 1 | 0 | -3.700580 | 4.360975  | -0.861712 |
| 50 | 6  | 0 | 3.631927  | -1.470941 | -0.983463 | 26 | 6 | 0 | -2.008849 | -0.522841 | 1.717292  |
| 51 | 1  | 0 | 6.248616  | 0.573754  | 1.161325  | 27 | 6 | 0 | -3.267368 | -0.790932 | 2.350618  |
| 52 | 1  | 0 | 5.823015  | 1.897466  | 3.210711  | 28 | 1 | 0 | -3.368508 | -1.689029 | 2.947660  |
| 53 | 1  | 0 | 3.485884  | 2.459666  | 3.866406  | 29 | 7 | 0 | -1.924706 | 0.606710  | 0.972397  |
| 54 | 1  | 0 | 1.577022  | 1.689116  | 2.415605  | 30 | 6 | 0 | -0.861208 | -1.357022 | 1.812878  |
| 55 | 1  | 0 | 6.070986  | 0.865788  | -1.255013 | 31 | 1 | 0 | 0.019449  | -1.035238 | 1.268824  |
| 56 | 1  | 0 | 6.519031  | -0.405705 | -3.331795 | 32 | 6 | 0 | -0.789010 | -2.533758 | 2.546707  |
| 57 | 1  | 0 | 5.085173  | -2.360154 | -3.922414 | 33 | 1 | 0 | -1.513233 | -2.759214 | 3.324346  |
| 58 | 1  | 0 | 3.225796  | -3.029145 | -2.381747 | 34 | 1 | 0 | 0.191734  | -2.964608 | 2.712876  |
| 59 | 8  | 0 | 1.809524  | 0.420002  | 0.177189  | 35 | 6 | 0 | -5.018612 | 0.020139  | -1.678003 |
| 60 | 8  | 0 | 2.664251  | -1.951249 | -0.118865 | 36 | 1 | 0 | -5.814135 | -0.388341 | -1.053995 |
| 61 | 15 | 0 | 1.258811  | -1.141207 | 0.141534  | 37 | 1 | 0 | -4.852241 | 1.073157  | -1.447546 |
| 62 | 8  | 0 | 0.751284  | -1.578602 | 1.487406  | 38 | 1 | 0 | -5.270549 | -0.083423 | -2.737472 |
| 63 | 8  | 0 | 0.357554  | -1.189458 | -1.072188 | 39 | 6 | 0 | 4.298314  | -0.157830 | 0.222748  |
| 64 | 6  | 0 | -2.834809 | -2.737097 | 1.596833  | 40 | 6 | 0 | 5.504747  | -0.876853 | 0.213461  |
| 65 | 6  | 0 | -1.675991 | -3.458263 | 2.248887  | 41 | 6 | 0 | 5.523413  | -2.270213 | 0.214037  |
| 66 | 1  | 0 | -0.766487 | -3.396446 | 1.642633  | 42 | 6 | 0 | 4.321343  | -2.981556 | 0.228057  |
| 67 | 1  | 0 | -1.423909 | -3.008234 | 3.216457  | 43 | 6 | 0 | 3.109836  | -2.293014 | 0.230195  |
| 68 | 1  | 0 | -1.918565 | -4.512289 | 2.414781  | 44 | 6 | 0 | 3.100589  | -0.898580 | 0.216722  |

-----

***TS<sub>Me-Ti(S-ex)</sub>***

B3LYP-D3/6-31g(d) in gas phase

SCF Done: E(RB3LYP) = -2063.029231 hartree

Sum of electronic and thermal Free Energies = -2062.554628 hartree

The number of imaginary frequency = 1

Imaginary frequency = -332.13

-----

| Center Number | Atomic Number | Atomic Type | Coordinates (Angstroms) |           |           |
|---------------|---------------|-------------|-------------------------|-----------|-----------|
|               |               |             | X                       | Y         | Z         |
| 1             | 6             | 0           | -1.554586               | -4.181233 | 1.340954  |
| 2             | 1             | 0           | -2.522375               | -3.688950 | 1.314590  |
| 3             | 1             | 0           | -1.488268               | -5.007691 | 2.043565  |
| 4             | 6             | 0           | -0.737809               | -4.197337 | 0.219387  |
| 5             | 1             | 0           | 0.071656                | -4.927136 | 0.213578  |
| 6             | 6             | 0           | -1.685566               | -2.264514 | -0.884958 |
| 7             | 1             | 0           | -2.582601               | -2.337750 | -0.284582 |
| 8             | 1             | 0           | -0.733394               | -0.852339 | -2.087891 |
| 9             | 7             | 0           | -1.651891               | -1.193656 | -1.729897 |
| 10            | 6             | 0           | -2.715077               | -0.336637 | -1.972165 |
| 11            | 8             | 0           | -3.853426               | -0.762637 | -1.367695 |
| 12            | 8             | 0           | -2.632276               | 0.661805  | -2.653723 |
| 13            | 1             | 0           | -1.010954               | 0.859108  | 0.499175  |
| 14            | 6             | 0           | -5.070802               | 3.283104  | 0.421394  |
| 15            | 6             | 0           | -5.254988               | 2.174343  | 1.227057  |

-----

**(R=F)**

***TS<sub>F-Cc(R-en)</sub>***

B3LYP-D3/6-31g(d) in gas phase  
 SCF Done: E(RB3LYP) = -2122.936896 hartree  
 Sum of electronic and thermal Free Energies = -2122.498689 hartree  
 The number of imaginary frequency = 1  
 Imaginary frequency = -364.42

| Center Number | Atomic Number | Atomic Type | Coordinates (Angstroms) |           |           |
|---------------|---------------|-------------|-------------------------|-----------|-----------|
|               |               |             | X                       | Y         | Z         |
| 1             | 6             | 0           | -0.082591               | 3.580321  | 1.648950  |
| 2             | 1             | 0           | -0.883375               | 3.027240  | 1.167863  |
| 3             | 1             | 0           | -0.425351               | 4.331669  | 2.355674  |
| 4             | 6             | 0           | 1.103096                | 3.835732  | 0.966051  |
| 5             | 1             | 0           | 1.755231                | 4.632489  | 1.317105  |
| 6             | 6             | 0           | 1.057675                | 1.913497  | -0.579444 |
| 7             | 1             | 0           | 0.014130                | 1.745914  | -0.346339 |
| 8             | 1             | 0           | 0.831439                | 0.383381  | -1.884568 |
| 9             | 7             | 0           | 1.553911                | 1.001847  | -1.456290 |
| 10            | 6             | 0           | 2.887951                | 0.663562  | -1.652674 |
| 11            | 8             | 0           | 2.957292                | -0.196012 | -2.690207 |
| 12            | 8             | 0           | 3.832824                | 1.027332  | -0.985522 |
| 13            | 1             | 0           | 0.938867                | -1.196819 | 0.749119  |
| 14            | 6             | 0           | 5.323042                | -2.901990 | 0.083783  |
| 15            | 6             | 0           | 5.412475                | -1.774196 | 0.880658  |
| 16            | 6             | 0           | 4.251558                | -1.059385 | 1.241101  |
| 17            | 6             | 0           | 2.995874                | -1.523653 | 0.772712  |
| 18            | 6             | 0           | 2.905482                | -2.665486 | -0.047709 |
| 19            | 6             | 0           | 4.064783                | -3.343404 | -0.380310 |
| 20            | 1             | 0           | 5.208883                | 0.500073  | 2.409859  |
| 21            | 1             | 0           | 6.220755                | -3.448045 | -0.190136 |
| 22            | 1             | 0           | 6.377409                | -1.420321 | 1.233838  |
| 23            | 6             | 0           | 4.256857                | 0.120349  | 2.048844  |
| 24            | 1             | 0           | 1.929249                | -2.982846 | -0.402281 |
| 25            | 1             | 0           | 4.004423                | -4.225318 | -1.011526 |
| 26            | 6             | 0           | 1.837701                | 0.283208  | 1.880475  |
| 27            | 6             | 0           | 3.099325                | 0.770833  | 2.356436  |
| 28            | 1             | 0           | 3.115339                | 1.668086  | 2.962402  |
| 29            | 7             | 0           | 1.859623                | -0.837758 | 1.115975  |
| 30            | 6             | 0           | 0.565449                | 0.838761  | 2.186822  |
| 31            | 1             | 0           | -0.294857               | 0.304231  | 1.797204  |
| 32            | 6             | 0           | 0.337858                | 1.988285  | 2.939975  |
| 33            | 1             | 0           | 1.143254                | 2.446429  | 3.506164  |
| 34            | 1             | 0           | -0.639814               | 2.093221  | 3.401727  |
| 35            | 6             | 0           | -4.477753               | -0.965052 | 0.211161  |
| 36            | 6             | 0           | -5.478891               | -1.314216 | 1.131885  |
| 37            | 6             | 0           | -5.619934               | -2.623225 | 1.587540  |
| 38            | 6             | 0           | -4.750594               | -3.617185 | 1.130729  |
| 39            | 6             | 0           | -3.748157               | -3.296978 | 0.217020  |
| 40            | 6             | 0           | -3.621674               | -1.987031 | -0.238865 |
| 41            | 6             | 0           | -4.340556               | 0.422850  | -0.285534 |
| 42            | 6             | 0           | -5.467781               | 1.180622  | -0.640320 |
| 43            | 6             | 0           | -5.348977               | 2.488642  | -1.106189 |
| 44            | 6             | 0           | -4.084558               | 3.065564  | -1.240476 |
| 45            | 6             | 0           | -2.948808               | 2.333836  | -0.896612 |
| 46            | 6             | 0           | -3.077257               | 1.032152  | -0.412813 |
| 47            | 1             | 0           | -6.139051               | -0.535744 | 1.504645  |

|    |    |   |           |           |           |
|----|----|---|-----------|-----------|-----------|
| 48 | 1  | 0 | -6.399361 | -2.864940 | 2.304731  |
| 49 | 1  | 0 | -4.849973 | -4.638875 | 1.486751  |
| 50 | 1  | 0 | -3.057405 | -4.042895 | -0.161081 |
| 51 | 1  | 0 | -6.448503 | 0.718960  | -0.566481 |
| 52 | 1  | 0 | -6.238730 | 3.048657  | -1.379514 |
| 53 | 1  | 0 | -3.979256 | 4.078569  | -1.618763 |
| 54 | 1  | 0 | -1.956118 | 2.757738  | -1.007617 |
| 55 | 8  | 0 | -2.680512 | -1.715595 | -1.219203 |
| 56 | 8  | 0 | -1.944722 | 0.375439  | 0.034022  |
| 57 | 15 | 0 | -1.302742 | -0.918307 | -0.823658 |
| 58 | 8  | 0 | -0.502886 | -1.690182 | 0.198723  |
| 59 | 8  | 0 | -0.675577 | -0.414754 | -2.089092 |
| 60 | 6  | 0 | 4.275399  | -0.690954 | -2.970704 |
| 61 | 1  | 0 | 4.680222  | -1.221724 | -2.105793 |
| 62 | 1  | 0 | 4.152344  | -1.370224 | -3.814751 |
| 63 | 1  | 0 | 4.944510  | 0.133148  | -3.234343 |
| 64 | 6  | 0 | 1.655756  | 3.039356  | -0.050850 |
| 65 | 9  | 0 | 2.872696  | 3.427247  | -0.490715 |

***TS<sub>F</sub>-Cc(S-en)***

B3LYP-D3/6-31g(d) in gas phase  
 SCF Done: E(RB3LYP) = -2122.935806 hartree  
 Sum of electronic and thermal Free Energies = -2122.498794 hartree  
 The number of imaginary frequency = 1  
 Imaginary frequency = -353.90

| Center Number | Atomic Number | Atomic Type | Coordinates (Angstroms) |           |           |
|---------------|---------------|-------------|-------------------------|-----------|-----------|
|               |               |             | X                       | Y         | Z         |
| 1             | 6             | 0           | 0.624781                | 3.556470  | 2.280448  |
| 2             | 1             | 0           | -0.276574               | 2.953728  | 2.226872  |
| 3             | 1             | 0           | 0.448223                | 4.607773  | 2.491277  |
| 4             | 6             | 0           | 1.815753                | 2.994686  | 2.723922  |
| 5             | 1             | 0           | 2.618519                | 3.647886  | 3.059122  |
| 6             | 6             | 0           | 1.354904                | 0.658474  | 2.094637  |
| 7             | 1             | 0           | 0.301259                | 0.886388  | 1.989129  |
| 8             | 1             | 0           | 0.754683                | -1.182052 | 1.587230  |
| 9             | 7             | 0           | 1.618605                | -0.637790 | 1.789507  |
| 10            | 6             | 0           | 2.845071                | -1.218963 | 1.493130  |
| 11            | 8             | 0           | 2.653846                | -2.547211 | 1.339378  |
| 12            | 8             | 0           | 3.905508                | -0.649405 | 1.349243  |
| 13            | 1             | 0           | 0.940205                | -0.070618 | -1.236471 |
| 14            | 6             | 0           | 5.065234                | -1.983416 | -2.571065 |
| 15            | 6             | 0           | 5.319044                | -0.714395 | -2.082534 |
| 16            | 6             | 0           | 4.262805                | 0.095827  | -1.615790 |
| 17            | 6             | 0           | 2.942856                | -0.421375 | -1.657004 |
| 18            | 6             | 0           | 2.683883                | -1.716543 | -2.148032 |
| 19            | 6             | 0           | 3.743600                | -2.480348 | -2.603232 |
| 20            | 1             | 0           | 5.440317                | 1.826802  | -1.041700 |
| 21            | 1             | 0           | 5.882369                | -2.601945 | -2.929975 |
| 22            | 1             | 0           | 6.333560                | -0.326447 | -2.047354 |
| 23            | 6             | 0           | 4.436218                | 1.414476  | -1.093547 |
| 24            | 1             | 0           | 1.660939                | -2.081356 | -2.153443 |
| 25            | 1             | 0           | 3.555156                | -3.479081 | -2.986590 |
| 26            | 6             | 0           | 2.046194                | 1.606010  | -0.703816 |

|    |    |   |           |           |           |    |   |   |           |           |           |
|----|----|---|-----------|-----------|-----------|----|---|---|-----------|-----------|-----------|
| 27 | 6  | 0 | 3.371827  | 2.146771  | -0.656225 | 6  | 6 | 0 | 1.072230  | 1.867072  | -0.580828 |
| 28 | 1  | 0 | 3.513991  | 3.141038  | -0.251440 | 7  | 1 | 0 | 0.029112  | 1.709426  | -0.336232 |
| 29 | 7  | 0 | 1.907552  | 0.352216  | -1.199345 | 8  | 1 | 0 | 0.756773  | 0.437112  | -1.970382 |
| 30 | 6  | 0 | 0.858780  | 2.286311  | -0.312313 | 9  | 7 | 0 | 1.517574  | 0.988696  | -1.517001 |
| 31 | 1  | 0 | -0.063052 | 1.726168  | -0.420240 | 10 | 6 | 0 | 2.802036  | 0.596056  | -1.882597 |
| 32 | 6  | 0 | 0.783240  | 3.590049  | 0.166072  | 11 | 8 | 0 | 3.737242  | 1.004087  | -1.006274 |
| 33 | 1  | 0 | 1.637080  | 4.256361  | 0.092774  | 12 | 8 | 0 | 3.016144  | -0.092016 | -2.857606 |
| 34 | 1  | 0 | -0.178051 | 4.091384  | 0.098206  | 13 | 1 | 0 | 0.925910  | -1.269740 | 0.523214  |
| 35 | 6  | 0 | 3.837402  | -3.286208 | 1.000671  | 14 | 6 | 0 | 5.273470  | -3.072656 | -0.168384 |
| 36 | 1  | 0 | 4.576077  | -3.210889 | 1.804008  | 15 | 6 | 0 | 5.370406  | -2.047608 | 0.756036  |
| 37 | 1  | 0 | 3.506093  | -4.318160 | 0.880757  | 16 | 6 | 0 | 4.225596  | -1.313932 | 1.131763  |
| 38 | 1  | 0 | 4.274888  | -2.912039 | 0.072415  | 17 | 6 | 0 | 2.974700  | -1.665063 | 0.560538  |
| 39 | 6  | 0 | -4.402082 | 0.549539  | -0.771453 | 18 | 6 | 0 | 2.879383  | -2.702599 | -0.387249 |
| 40 | 6  | 0 | -5.367524 | 1.153585  | -1.592809 | 19 | 6 | 0 | 4.024745  | -3.391637 | -0.743334 |
| 41 | 6  | 0 | -5.067109 | 2.266942  | -2.374562 | 20 | 1 | 0 | 5.194892  | 0.086238  | 2.480595  |
| 42 | 6  | 0 | -3.776270 | 2.798828  | -2.355298 | 21 | 1 | 0 | 6.158944  | -3.629543 | -0.459338 |
| 43 | 6  | 0 | -2.798282 | 2.217309  | -1.550282 | 22 | 1 | 0 | 6.329804  | -1.785490 | 1.195074  |
| 44 | 6  | 0 | -3.108650 | 1.108187  | -0.763466 | 23 | 6 | 0 | 4.246050  | -0.208364 | 2.038868  |
| 45 | 6  | 0 | -4.744078 | -0.624022 | 0.064138  | 24 | 1 | 0 | 1.911509  | -2.931128 | -0.823170 |
| 46 | 6  | 0 | -5.954187 | -0.684771 | 0.774153  | 25 | 1 | 0 | 3.960361  | -4.186698 | -1.480018 |
| 47 | 6  | 0 | -6.285872 | -1.795711 | 1.546650  | 26 | 6 | 0 | 1.844011  | 0.078000  | 1.793312  |
| 48 | 6  | 0 | -5.403007 | -2.875560 | 1.629527  | 27 | 6 | 0 | 3.106884  | 0.474494  | 2.346691  |
| 49 | 6  | 0 | -4.195110 | -2.839935 | 0.935328  | 28 | 1 | 0 | 3.134456  | 1.312820  | 3.031542  |
| 50 | 6  | 0 | -3.877896 | -1.727863 | 0.159272  | 29 | 7 | 0 | 1.852263  | -0.969010 | 0.929898  |
| 51 | 1  | 0 | -6.363806 | 0.721511  | -1.626246 | 30 | 6 | 0 | 0.583834  | 0.643329  | 2.128207  |
| 52 | 1  | 0 | -5.833441 | 2.708622  | -3.005245 | 31 | 1 | 0 | -0.286150 | 0.155282  | 1.701965  |
| 53 | 1  | 0 | -3.527701 | 3.660951  | -2.968287 | 32 | 6 | 0 | 0.377663  | 1.748266  | 2.950177  |
| 54 | 1  | 0 | -1.788171 | 2.612022  | -1.523152 | 33 | 1 | 0 | 1.191041  | 2.161911  | 3.538907  |
| 55 | 1  | 0 | -6.628697 | 0.165926  | 0.729376  | 34 | 1 | 0 | -0.598168 | 1.845293  | 3.417191  |
| 56 | 1  | 0 | -7.225602 | -1.813958 | 2.091526  | 35 | 6 | 0 | 5.088027  | 0.717119  | -1.401526 |
| 57 | 1  | 0 | -5.651354 | -3.741931 | 2.236319  | 36 | 1 | 0 | 5.225176  | -0.355640 | -1.549883 |
| 58 | 1  | 0 | -3.485982 | -3.659685 | 0.975824  | 37 | 1 | 0 | 5.333053  | 1.248602  | -2.325426 |
| 59 | 8  | 0 | -2.145730 | 0.626832  | 0.105921  | 38 | 1 | 0 | 5.707938  | 1.074366  | -0.578914 |
| 60 | 8  | 0 | -2.717244 | -1.756382 | -0.597412 | 39 | 6 | 0 | -4.382535 | 0.478144  | -0.194913 |
| 61 | 15 | 0 | -1.425349 | -0.861668 | -0.124808 | 40 | 6 | 0 | -5.513226 | 1.266914  | -0.459406 |
| 62 | 8  | 0 | -0.499775 | -0.790877 | -1.315683 | 41 | 6 | 0 | -5.396119 | 2.600748  | -0.845936 |
| 63 | 8  | 0 | -0.919047 | -1.269507 | 1.229687  | 42 | 6 | 0 | -4.130870 | 3.173434  | -0.990837 |
| 64 | 6  | 0 | 2.176686  | 1.641756  | 2.608153  | 43 | 6 | 0 | -2.991807 | 2.411302  | -0.735179 |
| 65 | 9  | 0 | 3.436276  | 1.345710  | 2.995465  | 44 | 6 | 0 | -3.118195 | 1.083569  | -0.328293 |

-----

***TS<sub>F</sub>-Ct(R-en)***

B3LYP-D3/6-31g(d) in gas phase

SCF Done: E(RB3LYP) = -2122.932397 hartree

Sum of electronic and thermal Free Energies = -2122.494512 hartree

The number of imaginary frequency = 1

Imaginary frequency = -359.31

-----

| Center Number | Atomic Number | Atomic Type | Coordinates (Angstroms) |          |          |
|---------------|---------------|-------------|-------------------------|----------|----------|
|               |               |             | X                       | Y        | Z        |
| 1             | 6             | 0           | -0.027596               | 3.421634 | 1.749630 |
| 2             | 1             | 0           | -0.839951               | 2.903804 | 1.249656 |
| 3             | 1             | 0           | -0.352543               | 4.136838 | 2.500745 |
| 4             | 6             | 0           | 1.153769                | 3.699394 | 1.068740 |
| 5             | 1             | 0           | 1.817581                | 4.469910 | 1.454972 |

|    |    |   |           |           |           |
|----|----|---|-----------|-----------|-----------|
| 45 | 6  | 0 | -4.515546 | -0.938531 | 0.213855  |
| 46 | 6  | 0 | -5.486242 | -1.340785 | 1.145399  |
| 47 | 6  | 0 | -5.623708 | -2.676166 | 1.518136  |
| 48 | 6  | 0 | -4.781313 | -3.643943 | 0.964836  |
| 49 | 6  | 0 | -3.809376 | -3.271184 | 0.038155  |
| 50 | 6  | 0 | -3.686341 | -1.934745 | -0.334114 |
| 51 | 1  | 0 | -6.495823 | 0.810235  | -0.379736 |
| 52 | 1  | 0 | -6.288670 | 3.184990  | -1.050876 |
| 53 | 1  | 0 | -4.028002 | 4.206902  | -1.309778 |
| 54 | 1  | 0 | -1.998395 | 2.830602  | -0.857390 |
| 55 | 1  | 0 | -6.125017 | -0.583985 | 1.592659  |
| 56 | 1  | 0 | -6.379266 | -2.959344 | 2.245629  |
| 57 | 1  | 0 | -4.878097 | -4.686368 | 1.255452  |
| 58 | 1  | 0 | -3.140608 | -3.995510 | -0.414167 |
| 59 | 8  | 0 | -1.978579 | 0.388491  | 0.035001  |
| 60 | 8  | 0 | -2.778908 | -1.606399 | -1.328822 |
| 61 | 15 | 0 | -1.380612 | -0.845061 | -0.936679 |
| 62 | 8  | 0 | -0.799759 | -0.253730 | -2.185579 |

|    |   |   |           |           |           |
|----|---|---|-----------|-----------|-----------|
| 63 | 8 | 0 | -0.544101 | -1.688413 | -0.003767 |
| 64 | 6 | 0 | 1.687767  | 2.956707  | 0.002412  |
| 65 | 9 | 0 | 2.905774  | 3.364139  | -0.426773 |

-----

***TS<sub>F</sub>-Ct(S-en)***

***F<sub>s</sub>-trans<sub>s</sub>-cis-B<sub>s</sub>-endo***

B3LYP-D3/6-31g(d) in gas phase

SCF Done: E(RB3LYP) = -2122.931994 hartree

Sum of electronic and thermal Free Energies = -2122.494287 hartree

The number of imaginary frequency = 1

Imaginary frequency = -349.74

| Center Number | Atomic Number | Atomic Type | Coordinates (Angstroms) |           |           |
|---------------|---------------|-------------|-------------------------|-----------|-----------|
|               |               |             | X                       | Y         | Z         |
| 1             | 6             | 0           | -0.968224               | 3.460272  | -2.465906 |
| 2             | 1             | 0           | -0.029362               | 2.917692  | -2.513902 |
| 3             | 1             | 0           | -0.885143               | 4.519485  | -2.693395 |
| 4             | 6             | 0           | -2.161462               | 2.819200  | -2.774497 |
| 5             | 1             | 0           | -3.035312               | 3.417697  | -3.023312 |
| 6             | 6             | 0           | -1.488787               | 0.528071  | -2.183747 |
| 7             | 1             | 0           | -0.454563               | 0.850883  | -2.181299 |
| 8             | 1             | 0           | -0.638750               | -1.213491 | -1.720989 |
| 9             | 7             | 0           | -1.578335               | -0.781798 | -1.840018 |
| 10            | 6             | 0           | -2.636496               | -1.598177 | -1.453141 |
| 11            | 8             | 0           | -3.783440               | -0.923062 | -1.272352 |
| 12            | 8             | 0           | -2.490784               | -2.787390 | -1.261564 |
| 13            | 1             | 0           | -0.864491               | -0.184233 | 1.052534  |
| 14            | 6             | 0           | -4.826279               | -2.080556 | 2.836819  |
| 15            | 6             | 0           | -5.119673               | -0.795629 | 2.416774  |
| 16            | 6             | 0           | -4.123163               | 0.003315  | 1.816645  |
| 17            | 6             | 0           | -2.816594               | -0.532542 | 1.672395  |
| 18            | 6             | 0           | -2.523003               | -1.847686 | 2.085029  |
| 19            | 6             | 0           | -3.527096               | -2.604964 | 2.661271  |
| 20            | 1             | 0           | -5.346152               | 1.749009  | 1.399518  |
| 21            | 1             | 0           | -5.596941               | -2.692695 | 3.295480  |
| 22            | 1             | 0           | -6.120353               | -0.387637 | 2.534756  |
| 23            | 6             | 0           | -4.348819               | 1.323762  | 1.318821  |
| 24            | 1             | 0           | -1.519178               | -2.233474 | 1.935992  |
| 25            | 1             | 0           | -3.310922               | -3.620347 | 2.979647  |
| 26            | 6             | 0           | -2.018064               | 1.502656  | 0.650687  |
| 27            | 6             | 0           | -3.341473               | 2.045389  | 0.748165  |
| 28            | 1             | 0           | -3.525001               | 3.042360  | 0.367724  |
| 29            | 7             | 0           | -1.833037               | 0.241784  | 1.111040  |
| 30            | 6             | 0           | -0.881380               | 2.201156  | 0.153479  |
| 31            | 1             | 0           | 0.061431                | 1.666361  | 0.181691  |
| 32            | 6             | 0           | -0.882204               | 3.502232  | -0.338152 |
| 33            | 1             | 0           | -1.736765               | 4.153300  | -0.184005 |
| 34            | 1             | 0           | 0.070557                | 4.021920  | -0.377173 |
| 35            | 6             | 0           | -4.916920               | -1.750104 | -0.960126 |
| 36            | 1             | 0           | -5.123505               | -2.436357 | -1.786122 |
| 37            | 1             | 0           | -4.734963               | -2.321575 | -0.048290 |
| 38            | 1             | 0           | -5.745648               | -1.056108 | -0.820418 |
| 39            | 6             | 0           | 4.401384                | 0.563016  | 0.908097  |
| 40            | 6             | 0           | 5.282183                | 1.078396  | 1.872407  |

|    |    |   |           |           |           |
|----|----|---|-----------|-----------|-----------|
| 41 | 6  | 0 | 4.885043  | 2.072136  | 2.764725  |
| 42 | 6  | 0 | 3.581397  | 2.570312  | 2.713581  |
| 43 | 6  | 0 | 2.686108  | 2.074938  | 1.767029  |
| 44 | 6  | 0 | 3.094489  | 1.086696  | 0.872248  |
| 45 | 6  | 0 | 4.840505  | -0.481163 | -0.045657 |
| 46 | 6  | 0 | 6.098736  | -0.416897 | -0.665919 |
| 47 | 6  | 0 | 6.520774  | -1.404675 | -1.553193 |
| 48 | 6  | 0 | 5.682208  | -2.483545 | -1.844907 |
| 49 | 6  | 0 | 4.428132  | -2.571103 | -1.243249 |
| 50 | 6  | 0 | 4.020057  | -1.582314 | -0.351334 |
| 51 | 1  | 0 | 6.287977  | 0.671239  | 1.927546  |
| 52 | 1  | 0 | 5.586626  | 2.446798  | 3.504720  |
| 53 | 1  | 0 | 3.259235  | 3.338991  | 3.410836  |
| 54 | 1  | 0 | 1.667750  | 2.444855  | 1.706227  |
| 55 | 1  | 0 | 6.739663  | 0.435557  | -0.457981 |
| 56 | 1  | 0 | 7.496635  | -1.326804 | -2.024329 |
| 57 | 1  | 0 | 6.001160  | -3.253733 | -2.541710 |
| 58 | 1  | 0 | 3.751974  | -3.395161 | -1.444024 |
| 59 | 8  | 0 | 2.216298  | 0.693866  | -0.122578 |
| 60 | 8  | 0 | 2.813063  | -1.745422 | 0.309349  |
| 61 | 15 | 0 | 1.522235  | -0.821609 | -0.103454 |
| 62 | 8  | 0 | 0.552556  | -0.914121 | 1.050914  |
| 63 | 8  | 0 | 1.065270  | -1.063731 | -1.514647 |
| 64 | 6  | 0 | -2.424220 | 1.447254  | -2.618228 |
| 65 | 9  | 0 | -3.699618 | 1.076877  | -2.877635 |

-----

***TS<sub>F</sub>-Tc(R-ex)***

B3LYP-D3/6-31g(d) in gas phase

SCF Done: E(RB3LYP) = -2122.940557 hartree

Sum of electronic and thermal Free Energies = -2122.502946 hartree

The number of imaginary frequency = 1

Imaginary frequency = -371.52

| Center Number | Atomic Number | Atomic Type | Coordinates (Angstroms) |           |           |
|---------------|---------------|-------------|-------------------------|-----------|-----------|
|               |               |             | X                       | Y         | Z         |
| 1             | 6             | 0           | -5.019979               | -3.000385 | 0.423886  |
| 2             | 1             | 0           | -5.392283               | -1.983127 | 0.506698  |
| 3             | 1             | 0           | -5.781770               | -3.733130 | 0.171739  |
| 4             | 6             | 0           | -3.948354               | -3.409956 | 1.213138  |
| 5             | 1             | 0           | -3.755989               | -4.471993 | 1.345660  |
| 6             | 6             | 0           | -2.925492               | -1.188723 | 1.517881  |
| 7             | 1             | 0           | -3.836551               | -0.670913 | 1.250109  |
| 8             | 1             | 0           | -0.898068               | -0.810739 | 1.860759  |
| 9             | 7             | 0           | -1.864083               | -0.394065 | 1.793766  |
| 10            | 6             | 0           | -2.018040               | 0.984031  | 1.746394  |
| 11            | 8             | 0           | -0.832472               | 1.588352  | 1.939892  |
| 12            | 8             | 0           | -3.073499               | 1.559758  | 1.551654  |
| 13            | 1             | 0           | -1.014360               | -0.272300 | -1.237414 |
| 14            | 6             | 0           | -1.464484               | 4.448302  | -1.613220 |
| 15            | 6             | 0           | -2.728560               | 3.889408  | -1.665885 |
| 16            | 6             | 0           | -2.893385               | 2.489618  | -1.591225 |
| 17            | 6             | 0           | -1.739828               | 1.674205  | -1.452707 |
| 18            | 6             | 0           | -0.451874               | 2.244982  | -1.394097 |
| 19            | 6             | 0           | -0.328880               | 3.619834  | -1.479606 |

|    |    |   |           |           |           | Number | Number | Type | X         | Y         | Z         |
|----|----|---|-----------|-----------|-----------|--------|--------|------|-----------|-----------|-----------|
| 20 | 1  | 0 | -5.056909 | 2.437110  | -1.759092 |        |        |      |           |           |           |
| 21 | 1  | 0 | -1.342722 | 5.525657  | -1.673530 |        |        |      |           |           |           |
| 22 | 1  | 0 | -3.609802 | 4.517477  | -1.766694 | 1      | 6      | 0    | 3.743182  | -3.901187 | -1.489953 |
| 23 | 6  | 0 | -4.159881 | 1.832110  | -1.655224 | 2      | 1      | 0    | 4.486523  | -3.332148 | -0.939193 |
| 24 | 1  | 0 | 0.413245  | 1.603766  | -1.263325 | 3      | 1      | 0    | 4.163847  | -4.637601 | -2.169182 |
| 25 | 1  | 0 | 0.660015  | 4.066829  | -1.433680 | 4      | 6      | 0    | 2.511167  | -4.180050 | -0.899700 |
| 26 | 6  | 0 | -3.079966 | -0.333775 | -1.432422 | 5      | 1      | 0    | 1.887070  | -4.970480 | -1.309762 |
| 27 | 6  | 0 | -4.254231 | 0.472599  | -1.588940 | 6      | 6      | 0    | 2.462042  | -2.244583 | 0.623617  |
| 28 | 1  | 0 | -5.219990 | -0.016017 | -1.639367 | 7      | 1      | 0    | 3.524050  | -2.070756 | 0.513891  |
| 29 | 7  | 0 | -1.890864 | 0.313143  | -1.366830 | 8      | 1      | 0    | 0.759676  | -1.355924 | 1.489572  |
| 30 | 6  | 0 | -3.059768 | -1.753472 | -1.343875 | 9      | 7      | 0    | 1.814422  | -1.369092 | 1.420633  |
| 31 | 1  | 0 | -2.078073 | -2.194381 | -1.196026 | 10     | 6      | 0    | 2.530843  | -0.342851 | 2.026966  |
| 32 | 6  | 0 | -4.165513 | -2.594263 | -1.471878 | 11     | 8      | 0    | 1.695612  | 0.440638  | 2.723151  |
| 33 | 1  | 0 | -5.097820 | -2.214217 | -1.882563 | 12     | 8      | 0    | 3.734271  | -0.181868 | 1.929146  |
| 34 | 1  | 0 | -3.973324 | -3.634420 | -1.710966 | 13     | 1      | 0    | 1.070929  | 0.275572  | -0.967778 |
| 35 | 6  | 0 | -0.881750 | 3.025588  | 1.975391  | 14     | 6      | 0    | 2.833218  | 4.295164  | 0.898325  |
| 36 | 1  | 0 | -1.360703 | 3.359738  | 2.900747  | 15     | 6      | 0    | 3.877815  | 3.577425  | 0.342882  |
| 37 | 1  | 0 | 0.158513  | 3.348885  | 1.943290  | 16     | 6      | 0    | 3.639237  | 2.334961  | -0.282361 |
| 38 | 1  | 0 | -1.429722 | 3.416217  | 1.117366  | 17     | 6      | 0    | 2.309274  | 1.842069  | -0.332300 |
| 39 | 6  | 0 | 4.303689  | -0.559492 | -0.685819 | 18     | 6      | 0    | 1.249621  | 2.563021  | 0.256126  |
| 40 | 6  | 0 | 5.320188  | -0.289727 | -1.615994 | 19     | 6      | 0    | 1.519813  | 3.779820  | 0.856064  |
| 41 | 6  | 0 | 5.480207  | -1.063915 | -2.763348 | 20     | 1      | 0    | 5.688584  | 1.885326  | -0.842708 |
| 42 | 6  | 0 | 4.612751  | -2.131320 | -3.008006 | 21     | 1      | 0    | 3.022831  | 5.251806  | 1.375685  |
| 43 | 6  | 0 | 3.595406  | -2.421356 | -2.100591 | 22     | 1      | 0    | 4.894882  | 3.958772  | 0.381430  |
| 44 | 6  | 0 | 3.448451  | -1.647930 | -0.950884 | 23     | 6      | 0    | 4.661607  | 1.531063  | -0.877358 |
| 45 | 6  | 0 | 4.145631  | 0.260667  | 0.536666  | 24     | 1      | 0    | 0.246926  | 2.147681  | 0.248790  |
| 46 | 6  | 0 | 5.250514  | 0.662495  | 1.303694  | 25     | 1      | 0    | 0.706820  | 4.339157  | 1.309786  |
| 47 | 6  | 0 | 5.089239  | 1.421540  | 2.461649  | 26     | 6      | 0    | 3.015340  | -0.132896 | -1.532676 |
| 48 | 6  | 0 | 3.807842  | 1.781109  | 2.888037  | 27     | 6      | 0    | 4.366707  | 0.343460  | -1.479134 |
| 49 | 6  | 0 | 2.694206  | 1.397642  | 2.142260  | 28     | 1      | 0    | 5.148189  | -0.254670 | -1.932454 |
| 50 | 6  | 0 | 2.870384  | 0.664387  | 0.971253  | 29     | 7      | 0    | 2.065917  | 0.641358  | -0.947311 |
| 51 | 1  | 0 | 5.978662  | 0.555839  | -1.435901 | 30     | 6      | 0    | 2.576454  | -1.324256 | -2.168870 |
| 52 | 1  | 0 | 6.272267  | -0.828517 | -3.468808 | 31     | 1      | 0    | 1.502094  | -1.481227 | -2.154820 |
| 53 | 1  | 0 | 4.725739  | -2.736240 | -3.903558 | 32     | 6      | 0    | 3.375128  | -2.277478 | -2.801349 |
| 54 | 1  | 0 | 2.907948  | -3.246075 | -2.255575 | 33     | 1      | 0    | 4.425017  | -2.073587 | -2.999537 |
| 55 | 1  | 0 | 6.243577  | 0.348129  | 0.994330  | 34     | 1      | 0    | 2.901015  | -2.903931 | -3.548997 |
| 56 | 1  | 0 | 5.960340  | 1.712597  | 3.042072  | 35     | 6      | 0    | 2.327201  | 1.511534  | 3.443468  |
| 57 | 1  | 0 | 3.675101  | 2.350641  | 3.804006  | 36     | 1      | 0    | 2.911660  | 2.139558  | 2.768723  |
| 58 | 1  | 0 | 1.681738  | 1.630822  | 2.451409  | 37     | 1      | 0    | 1.508268  | 2.080092  | 3.883548  |
| 59 | 8  | 0 | 2.497171  | -2.032966 | -0.022058 | 38     | 1      | 0    | 2.979526  | 1.108393  | 4.223753  |
| 60 | 8  | 0 | 1.767786  | 0.386636  | 0.183611  | 39     | 6      | 0    | -4.168962 | 1.016442  | -0.680763 |
| 61 | 15 | 0 | 1.129049  | -1.148783 | 0.197819  | 40     | 6      | 0    | -5.051439 | 1.695850  | -1.535679 |
| 62 | 8  | 0 | 0.249981  | -1.200906 | -1.032264 | 41     | 6      | 0    | -4.649549 | 2.819689  | -2.254533 |
| 63 | 8  | 0 | 0.587824  | -1.487123 | 1.555703  | 42     | 6      | 0    | -3.338736 | 3.286404  | -2.135861 |
| 64 | 6  | 0 | -2.928975 | -2.559554 | 1.660246  | 43     | 6      | 0    | -2.442086 | 2.629526  | -1.294964 |
| 65 | 9  | 0 | -1.830201 | -3.140150 | 2.189947  | 44     | 6      | 0    | -2.854380 | 1.511015  | -0.571540 |
|    |    |   |           |           |           | 45     | 6      | 0    | -4.613573 | -0.169895 | 0.085517  |
|    |    |   |           |           |           | 46     | 6      | 0    | -5.865301 | -0.200813 | 0.720985  |
|    |    |   |           |           |           | 47     | 6      | 0    | -6.290656 | -1.322896 | 1.428984  |
|    |    |   |           |           |           | 48     | 6      | 0    | -5.461940 | -2.444137 | 1.521101  |
|    |    |   |           |           |           | 49     | 6      | 0    | -4.214442 | -2.438997 | 0.899731  |
|    |    |   |           |           |           | 50     | 6      | 0    | -3.803327 | -1.315332 | 0.186772  |
|    |    |   |           |           |           | 51     | 1      | 0    | -6.063028 | 1.315109  | -1.646388 |
|    |    |   |           |           |           | 52     | 1      | 0    | -5.352888 | 3.321000  | -2.913518 |
|    |    |   |           |           |           | 53     | 1      | 0    | -3.012200 | 4.156947  | -2.698329 |
|    |    |   |           |           |           | 54     | 1      | 0    | -1.419290 | 2.974142  | -1.183803 |
|    |    |   |           |           |           | 55     | 1      | 0    | -6.497863 | 0.681265  | 0.670625  |

  

| Center                                                             | Atomic | Atomic | Coordinates (Angstroms) |
|--------------------------------------------------------------------|--------|--------|-------------------------|
| -----                                                              |        |        |                         |
| <i>TSF-Tc(S-ex)</i>                                                |        |        |                         |
| B3LYP-D3/6-31g(d) in gas phase                                     |        |        |                         |
| SCF Done: E(RB3LYP) = -2122.938184 hartree                         |        |        |                         |
| Sum of electronic and thermal Free Energies = -2122.500877 hartree |        |        |                         |
| The number of imaginary frequency = 1                              |        |        |                         |
| Imaginary frequency = -370.81                                      |        |        |                         |
| -----                                                              |        |        |                         |

|    |    |   |           |           |           |
|----|----|---|-----------|-----------|-----------|
| 56 | 1  | 0 | -7.261035 | -1.317818 | 1.917606  |
| 57 | 1  | 0 | -5.783363 | -3.319405 | 2.078951  |
| 58 | 1  | 0 | -3.544880 | -3.290960 | 0.949274  |
| 59 | 8  | 0 | -1.971534 | 0.950791  | 0.334113  |
| 60 | 8  | 0 | -2.604648 | -1.370889 | -0.504371 |
| 61 | 15 | 0 | -1.301390 | -0.547171 | 0.061775  |
| 62 | 8  | 0 | -0.336443 | -0.454915 | -1.098165 |
| 63 | 8  | 0 | -0.845827 | -1.050733 | 1.400362  |
| 64 | 6  | 0 | 1.885624  | -3.352874 | 0.040158  |
| 65 | 9  | 0 | 0.590487  | -3.613778 | 0.335462  |

-----  
***TS<sub>F</sub>-Ti(R-ex)***

B3LYP-D3/6-31g(d) in gas phase

SCF Done: E(RB3LYP) = -2122.936705 hartree

Sum of electronic and thermal Free Energies = -2122.498404 hartree

The number of imaginary frequency = 1

Imaginary frequency = -369.34

| Center Number | Atomic Number | Atomic Type | Coordinates (Angstroms) |           |           |
|---------------|---------------|-------------|-------------------------|-----------|-----------|
|               |               |             | X                       | Y         | Z         |
| 1             | 6             | 0           | -4.772423               | -3.181172 | 0.361508  |
| 2             | 1             | 0           | -5.174518               | -2.172105 | 0.388720  |
| 3             | 1             | 0           | -5.504048               | -3.943998 | 0.108974  |
| 4             | 6             | 0           | -3.723923               | -3.531296 | 1.208548  |
| 5             | 1             | 0           | -3.506077               | -4.582420 | 1.381992  |
| 6             | 6             | 0           | -2.777770               | -1.269028 | 1.513124  |
| 7             | 1             | 0           | -3.692604               | -0.788266 | 1.198953  |
| 8             | 1             | 0           | -0.762216               | -0.875923 | 1.906097  |
| 9             | 7             | 0           | -1.731670               | -0.462322 | 1.815033  |
| 10            | 6             | 0           | -1.779636               | 0.921727  | 1.818310  |
| 11            | 8             | 0           | -3.028130               | 1.388463  | 1.572868  |
| 12            | 8             | 0           | -0.814580               | 1.628692  | 2.020734  |
| 13            | 1             | 0           | -0.906226               | -0.277652 | -1.146918 |
| 14            | 6             | 0           | -1.726971               | 4.405740  | -1.614429 |
| 15            | 6             | 0           | -2.916450               | 3.732861  | -1.826894 |
| 16            | 6             | 0           | -2.966298               | 2.325801  | -1.728064 |
| 17            | 6             | 0           | -1.772527               | 1.617409  | -1.422771 |
| 18            | 6             | 0           | -0.564160               | 2.306816  | -1.194293 |
| 19            | 6             | 0           | -0.555675               | 3.686779  | -1.291976 |
| 20            | 1             | 0           | -5.087132               | 2.082036  | -2.124530 |
| 21            | 1             | 0           | -1.692788               | 5.488555  | -1.688067 |
| 22            | 1             | 0           | -3.827749               | 4.275615  | -2.065092 |
| 23            | 6             | 0           | -4.160608               | 1.560309  | -1.896950 |
| 24            | 1             | 0           | 0.329402                | 1.751951  | -0.926513 |
| 25            | 1             | 0           | 0.370720                | 4.222910  | -1.108901 |
| 26            | 6             | 0           | -2.933770               | -0.499583 | -1.489214 |
| 27            | 6             | 0           | -4.151782               | 0.201309  | -1.775363 |
| 28            | 1             | 0           | -5.064311               | -0.368448 | -1.903537 |
| 29            | 7             | 0           | -1.812802               | 0.248128  | -1.330647 |
| 30            | 6             | 0           | -2.812268               | -1.910559 | -1.365780 |
| 31            | 1             | 0           | -1.812205               | -2.275031 | -1.151454 |
| 32            | 6             | 0           | -3.852944               | -2.828311 | -1.510512 |
| 33            | 1             | 0           | -4.787642               | -2.532730 | -1.980951 |
| 34            | 1             | 0           | -3.582151               | -3.863116 | -1.689407 |

|    |    |   |           |           |           |
|----|----|---|-----------|-----------|-----------|
| 35 | 6  | 0 | -3.153798 | 2.819552  | 1.652118  |
| 36 | 1  | 0 | -2.440380 | 3.306963  | 0.986256  |
| 37 | 1  | 0 | -4.176942 | 3.035412  | 1.343372  |
| 38 | 1  | 0 | -2.982743 | 3.155869  | 2.678660  |
| 39 | 6  | 0 | 4.170061  | 0.460512  | 0.553485  |
| 40 | 6  | 0 | 5.236921  | 0.957465  | 1.319277  |
| 41 | 6  | 0 | 5.012173  | 1.784736  | 2.418157  |
| 42 | 6  | 0 | 3.706263  | 2.126969  | 2.780895  |
| 43 | 6  | 0 | 2.627264  | 1.647586  | 2.039409  |
| 44 | 6  | 0 | 2.869604  | 0.832685  | 0.936699  |
| 45 | 6  | 0 | 4.397309  | -0.403204 | -0.628332 |
| 46 | 6  | 0 | 5.424698  | -0.117016 | -1.542197 |
| 47 | 6  | 0 | 5.653509  | -0.919632 | -2.657835 |
| 48 | 6  | 0 | 4.844282  | -2.034492 | -2.888967 |
| 49 | 6  | 0 | 3.817026  | -2.341627 | -1.998761 |
| 50 | 6  | 0 | 3.601208  | -1.538701 | -0.880208 |
| 51 | 1  | 0 | 6.250394  | 0.668118  | 1.054807  |
| 52 | 1  | 0 | 5.854549  | 2.149489  | 2.999641  |
| 53 | 1  | 0 | 3.527015  | 2.761058  | 3.645103  |
| 54 | 1  | 0 | 1.597417  | 1.878816  | 2.289199  |
| 55 | 1  | 0 | 6.036631  | 0.765243  | -1.374959 |
| 56 | 1  | 0 | 6.453010  | -0.669257 | -3.349674 |
| 57 | 1  | 0 | 5.010234  | -2.663029 | -3.759713 |
| 58 | 1  | 0 | 3.174431  | -3.203880 | -2.142182 |
| 59 | 8  | 0 | 1.798125  | 0.441194  | 0.150452  |
| 60 | 8  | 0 | 2.646841  | -1.947460 | 0.034251  |
| 61 | 15 | 0 | 1.245301  | -1.119334 | 0.248648  |
| 62 | 8  | 0 | 0.750720  | -1.445641 | 1.628090  |
| 63 | 8  | 0 | 0.332531  | -1.253833 | -0.951902 |
| 64 | 6  | 0 | -2.750072 | -2.639001 | 1.674182  |
| 65 | 9  | 0 | -1.654646 | -3.175103 | 2.254975  |

-----  
***TS<sub>F</sub>-Ti(S-ex)***

B3LYP-D3/6-31g(d) in gas phase

SCF Done: E(RB3LYP) = -2122.936091 hartree

Sum of electronic and thermal Free Energies = -2122.497622 hartree

The number of imaginary frequency = 1

Imaginary frequency = -366.18

| Center Number | Atomic Number | Atomic Type | Coordinates (Angstroms) |           |           |
|---------------|---------------|-------------|-------------------------|-----------|-----------|
|               |               |             | X                       | Y         | Z         |
| 1             | 6             | 0           | 1.289735                | 4.140794  | 1.562709  |
| 2             | 1             | 0           | 2.318386                | 3.802271  | 1.472971  |
| 3             | 1             | 0           | 1.146887                | 4.945101  | 2.279375  |
| 4             | 6             | 0           | 0.446449                | 4.091790  | 0.456078  |
| 5             | 1             | 0           | -0.471391               | 4.674923  | 0.461672  |
| 6             | 6             | 0           | 1.594224                | 2.273763  | -0.767595 |
| 7             | 1             | 0           | 2.514223                | 2.420261  | -0.220575 |
| 8             | 1             | 0           | 0.649837                | 0.915058  | -2.039206 |
| 9             | 7             | 0           | 1.572917                | 1.257778  | -1.664098 |
| 10            | 6             | 0           | 2.671867                | 0.472664  | -1.987438 |
| 11            | 8             | 0           | 3.803140                | 0.922177  | -1.387354 |
| 12            | 8             | 0           | 2.617751                | -0.487729 | -2.722096 |
| 13            | 1             | 0           | 1.057246                | -0.820946 | 0.498132  |

|    |    |   |           |           |           |
|----|----|---|-----------|-----------|-----------|
| 14 | 6  | 0 | 5.192249  | -3.119954 | 0.192498  |
| 15 | 6  | 0 | 5.368728  | -2.043546 | 1.042818  |
| 16 | 6  | 0 | 4.296571  | -1.165488 | 1.311113  |
| 17 | 6  | 0 | 3.038319  | -1.417527 | 0.701888  |
| 18 | 6  | 0 | 2.864477  | -2.507371 | -0.176220 |
| 19 | 6  | 0 | 3.938880  | -3.343724 | -0.418900 |
| 20 | 1  | 0 | 5.351642  | 0.204188  | 2.625039  |
| 21 | 1  | 0 | 6.019594  | -3.792521 | -0.012922 |
| 22 | 1  | 0 | 6.332023  | -1.856542 | 1.510560  |
| 23 | 6  | 0 | 4.397373  | -0.015149 | 2.152127  |
| 24 | 1  | 0 | 1.897540  | -2.652025 | -0.647000 |
| 25 | 1  | 0 | 3.816051  | -4.182148 | -1.097892 |
| 26 | 6  | 0 | 2.055807  | 0.516686  | 1.757726  |
| 27 | 6  | 0 | 3.323710  | 0.800427  | 2.365898  |
| 28 | 1  | 0 | 3.413051  | 1.669631  | 3.006413  |
| 29 | 7  | 0 | 1.986932  | -0.575629 | 0.959743  |
| 30 | 6  | 0 | 0.876509  | 1.292347  | 1.927081  |
| 31 | 1  | 0 | -0.009091 | 0.943898  | 1.405375  |
| 32 | 6  | 0 | 0.772830  | 2.442044  | 2.709734  |
| 33 | 1  | 0 | 1.522018  | 2.665724  | 3.465238  |
| 34 | 1  | 0 | -0.225793 | 2.775826  | 2.969541  |
| 35 | 6  | 0 | 4.996567  | 0.213176  | -1.763971 |
| 36 | 1  | 0 | 5.788316  | 0.632947  | -1.142838 |
| 37 | 1  | 0 | 4.887092  | -0.855686 | -1.576371 |
| 38 | 1  | 0 | 5.212088  | 0.375909  | -2.823827 |
| 39 | 6  | 0 | -4.353985 | 0.035628  | 0.158268  |
| 40 | 6  | 0 | -5.631222 | 0.616591  | 0.104528  |
| 41 | 6  | 0 | -5.799210 | 1.986855  | -0.083456 |
| 42 | 6  | 0 | -4.680267 | 2.808638  | -0.237925 |
| 43 | 6  | 0 | -3.400842 | 2.258145  | -0.189126 |
| 44 | 6  | 0 | -3.242674 | 0.889184  | 0.018647  |
| 45 | 6  | 0 | -4.186358 | -1.421780 | 0.357774  |
| 46 | 6  | 0 | -4.970507 | -2.125489 | 1.286279  |
| 47 | 6  | 0 | -4.828705 | -3.500303 | 1.462020  |
| 48 | 6  | 0 | -3.886364 | -4.205017 | 0.708521  |
| 49 | 6  | 0 | -3.094648 | -3.530419 | -0.218930 |
| 50 | 6  | 0 | -3.250733 | -2.157169 | -0.393417 |
| 51 | 1  | 0 | -6.500654 | -0.029476 | 0.189924  |
| 52 | 1  | 0 | -6.799675 | 2.408099  | -0.128491 |
| 53 | 1  | 0 | -4.802363 | 3.875531  | -0.405119 |
| 54 | 1  | 0 | -2.512945 | 2.862044  | -0.329937 |
| 55 | 1  | 0 | -5.686201 | -1.572583 | 1.888665  |
| 56 | 1  | 0 | -5.444669 | -4.018445 | 2.191838  |
| 57 | 1  | 0 | -3.765339 | -5.276324 | 0.844146  |
| 58 | 1  | 0 | -2.354902 | -4.044369 | -0.823320 |
| 59 | 8  | 0 | -1.963235 | 0.389704  | 0.182173  |
| 60 | 8  | 0 | -2.518068 | -1.532033 | -1.388643 |
| 61 | 15 | 0 | -1.251791 | -0.572171 | -0.978240 |
| 62 | 8  | 0 | -0.874072 | 0.233608  | -2.184600 |
| 63 | 8  | 0 | -0.215376 | -1.364295 | -0.211303 |
| 64 | 6  | 0 | 0.556839  | 3.164699  | -0.587284 |
| 65 | 9  | 0 | -0.492210 | 3.082528  | -1.441266 |

(R=OMe)

*TS<sub>OMe-Cc(R-en)</sub>*

B3LYP-D3/6-31g(d) in gas phase

SCF Done: E(RB3LYP) = -2138.229020 hartree  
Sum of electronic and thermal Free Energies = -2137.751418 hartree  
The number of imaginary frequency = 1  
Imaginary frequency = -351.89

| Center Number | Atomic Number | Atomic Type | Coordinates (Angstroms) |           |           |
|---------------|---------------|-------------|-------------------------|-----------|-----------|
|               |               |             | X                       | Y         | Z         |
| 1             | 6             | 0           | -0.081855               | 3.444690  | 1.618397  |
| 2             | 1             | 0           | -0.869393               | 2.847957  | 1.170454  |
| 3             | 1             | 0           | -0.438076               | 4.205347  | 2.308708  |
| 4             | 6             | 0           | 1.093316                | 3.706119  | 0.924060  |
| 5             | 1             | 0           | 1.695676                | 4.549727  | 1.254271  |
| 6             | 6             | 0           | 1.034715                | 1.780779  | -0.580580 |
| 7             | 1             | 0           | -0.013279               | 1.642591  | -0.348682 |
| 8             | 1             | 0           | 0.741550                | 0.267149  | -1.892824 |
| 9             | 7             | 0           | 1.490909                | 0.845138  | -1.458706 |
| 10            | 6             | 0           | 2.799059                | 0.433983  | -1.656440 |
| 11            | 8             | 0           | 2.825833                | -0.409746 | -2.709693 |
| 12            | 8             | 0           | 3.766978                | 0.719284  | -0.980103 |
| 13            | 1             | 0           | 0.767746                | -1.326266 | 0.723073  |
| 14            | 6             | 0           | 5.028196                | -3.310213 | 0.032816  |
| 15            | 6             | 0           | 5.190009                | -2.214014 | 0.862129  |
| 16            | 6             | 0           | 4.079584                | -1.428739 | 1.233624  |
| 17            | 6             | 0           | 2.798462                | -1.788445 | 0.742879  |
| 18            | 6             | 0           | 2.634416                | -2.899686 | -0.107362 |
| 19            | 6             | 0           | 3.745929                | -3.648860 | -0.450796 |
| 20            | 1             | 0           | 5.130034                | 0.013222  | 2.471844  |
| 21            | 1             | 0           | 5.887423                | -3.910908 | -0.249993 |
| 22            | 1             | 0           | 6.174281                | -1.940816 | 1.233415  |
| 23            | 6             | 0           | 4.158963                | -0.278968 | 2.080365  |
| 24            | 1             | 0           | 1.640825                | -3.138323 | -0.475113 |
| 25            | 1             | 0           | 3.628570                | -4.507372 | -1.105803 |
| 26            | 6             | 0           | 1.759673                | 0.068539  | 1.886579  |
| 27            | 6             | 0           | 3.048201                | 0.447133  | 2.391776  |
| 28            | 1             | 0           | 3.118636                | 1.316332  | 3.033959  |
| 29            | 7             | 0           | 1.710535                | -1.032922 | 1.095882  |
| 30            | 6             | 0           | 0.526546                | 0.697437  | 2.207278  |
| 31            | 1             | 0           | -0.366442               | 0.212269  | 1.825323  |
| 32            | 6             | 0           | 0.369344                | 1.858710  | 2.955297  |
| 33            | 1             | 0           | 1.211253                | 2.305056  | 3.476002  |
| 34            | 1             | 0           | -0.588401               | 2.019285  | 3.440963  |
| 35            | 6             | 0           | -4.633020               | -0.825210 | 0.220038  |
| 36            | 6             | 0           | -5.649082               | -1.121824 | 1.142734  |
| 37            | 6             | 0           | -5.854705               | -2.421100 | 1.601799  |
| 38            | 6             | 0           | -5.036573               | -3.458182 | 1.146304  |
| 39            | 6             | 0           | -4.020720               | -3.190518 | 0.230474  |
| 40            | 6             | 0           | -3.829408               | -1.889602 | -0.228938 |
| 41            | 6             | 0           | -4.426967               | 0.552778  | -0.280315 |
| 42            | 6             | 0           | -5.514504               | 1.365072  | -0.638077 |
| 43            | 6             | 0           | -5.328997               | 2.663163  | -1.109917 |
| 44            | 6             | 0           | -4.036711               | 3.174022  | -1.247135 |
| 45            | 6             | 0           | -2.939223               | 2.387535  | -0.899792 |
| 46            | 6             | 0           | -3.134461               | 1.096699  | -0.409583 |
| 47            | 1             | 0           | -6.269107               | -0.310383 | 1.514157  |
| 48            | 1             | 0           | -6.644286               | -2.621971 | 2.320522  |



|    |    |   |           |           |           |
|----|----|---|-----------|-----------|-----------|
| 49 | 1  | 0 | -5.186269 | -4.472841 | 1.504917  |
| 50 | 1  | 0 | -3.368699 | -3.970970 | -0.146731 |
| 51 | 1  | 0 | -6.517414 | 0.954078  | -0.562401 |
| 52 | 1  | 0 | -6.189051 | 3.266699  | -1.385824 |
| 53 | 1  | 0 | -3.880003 | 4.178510  | -1.630328 |
| 54 | 1  | 0 | -1.926448 | 2.760215  | -1.011602 |
| 55 | 8  | 0 | -2.877981 | -1.668208 | -1.211450 |
| 56 | 8  | 0 | -2.037764 | 0.382949  | 0.040734  |
| 57 | 15 | 0 | -1.461207 | -0.936677 | -0.822918 |
| 58 | 8  | 0 | -0.695577 | -1.749336 | 0.195002  |
| 59 | 8  | 0 | -0.815916 | -0.464462 | -2.090500 |
| 60 | 6  | 0 | 4.113028  | -0.977083 | -2.992380 |
| 61 | 1  | 0 | 4.484055  | -1.541719 | -2.133709 |
| 62 | 1  | 0 | 3.953810  | -1.637287 | -3.845569 |
| 63 | 1  | 0 | 4.830228  | -0.190440 | -3.244237 |
| 64 | 6  | 0 | 1.674985  | 2.906976  | -0.089487 |
| 65 | 8  | 0 | 2.860805  | 3.305594  | -0.657190 |
| 66 | 6  | 0 | 3.996216  | 3.399210  | 0.203901  |
| 67 | 1  | 0 | 4.194051  | 2.438574  | 0.685337  |
| 68 | 1  | 0 | 4.838534  | 3.659943  | -0.439878 |
| 69 | 1  | 0 | 3.870675  | 4.185974  | 0.960978  |

-----  
***TS<sub>OMe</sub>-Cc(S-en)***

B3LYP-D3/6-31g(d) in gas phase

SCF Done: E(RB3LYP) = -2138.227023 hartree

Sum of electronic and thermal Free Energies = -2137.751958 hartree

The number of imaginary frequency = 1

Imaginary frequency = -344.86

| Center Number | Atomic Number | Atomic Type | Coordinates (Angstroms) |           |           |
|---------------|---------------|-------------|-------------------------|-----------|-----------|
|               |               |             | X                       | Y         | Z         |
| 1             | 6             | 0           | 0.659315                | 3.730282  | 1.769798  |
| 2             | 1             | 0           | -0.229337               | 3.109143  | 1.825244  |
| 3             | 1             | 0           | 0.468744                | 4.794725  | 1.880134  |
| 4             | 6             | 0           | 1.892174                | 3.243308  | 2.181996  |
| 5             | 1             | 0           | 2.691728                | 3.955606  | 2.376859  |
| 6             | 6             | 0           | 1.439684                | 0.865734  | 1.874484  |
| 7             | 1             | 0           | 0.382194                | 1.101290  | 1.858884  |
| 8             | 1             | 0           | 0.713249                | -0.973023 | 1.580627  |
| 9             | 7             | 0           | 1.620334                | -0.469005 | 1.669740  |
| 10            | 6             | 0           | 2.768279                | -1.175344 | 1.344437  |
| 11            | 8             | 0           | 2.437648                | -2.483580 | 1.246105  |
| 12            | 8             | 0           | 3.881983                | -0.731503 | 1.157702  |
| 13            | 1             | 0           | 0.764483                | -0.241003 | -1.350917 |
| 14            | 6             | 0           | 4.797800                | -2.334248 | -2.697000 |
| 15            | 6             | 0           | 5.090761                | -1.033657 | -2.326667 |
| 16            | 6             | 0           | 4.067305                | -0.166768 | -1.890680 |
| 17            | 6             | 0           | 2.739234                | -0.660846 | -1.835693 |
| 18            | 6             | 0           | 2.440951                | -1.988171 | -2.202238 |
| 19            | 6             | 0           | 3.468877                | -2.807029 | -2.634913 |
| 20            | 1             | 0           | 5.294120                | 1.583239  | -1.506111 |
| 21            | 1             | 0           | 5.590078                | -2.995503 | -3.034983 |
| 22            | 1             | 0           | 6.111769                | -0.663255 | -2.364244 |
| 23            | 6             | 0           | 4.281395                | 1.189669  | -1.492719 |

|    |    |   |           |           |           |
|----|----|---|-----------|-----------|-----------|
| 24 | 1  | 0 | 1.413796  | -2.333909 | -2.132384 |
| 25 | 1  | 0 | 3.249190  | -3.830573 | -2.925051 |
| 26 | 6  | 0 | 1.909472  | 1.464607  | -1.046355 |
| 27 | 6  | 0 | 3.245400  | 1.980869  | -1.093403 |
| 28 | 1  | 0 | 3.419478  | 3.002221  | -0.779122 |
| 29 | 7  | 0 | 1.734943  | 0.169425  | -1.408405 |
| 30 | 6  | 0 | 0.747570  | 2.201454  | -0.686959 |
| 31 | 1  | 0 | -0.184256 | 1.647649  | -0.689161 |
| 32 | 6  | 0 | 0.707172  | 3.548982  | -0.349396 |
| 33 | 1  | 0 | 1.561812  | 4.192602  | -0.532138 |
| 34 | 1  | 0 | -0.252518 | 4.053061  | -0.417534 |
| 35 | 6  | 0 | 3.536564  | -3.358445 | 0.952091  |
| 36 | 1  | 0 | 4.257188  | -3.353214 | 1.775803  |
| 37 | 1  | 0 | 3.092800  | -4.348212 | 0.840224  |
| 38 | 1  | 0 | 4.039321  | -3.055646 | 0.031594  |
| 39 | 6  | 0 | -4.546511 | 0.472879  | -0.772571 |
| 40 | 6  | 0 | -5.533568 | 0.945242  | -1.652329 |
| 41 | 6  | 0 | -5.252422 | 1.919269  | -2.608054 |
| 42 | 6  | 0 | -3.960603 | 2.440058  | -2.707885 |
| 43 | 6  | 0 | -2.961536 | 1.987430  | -1.847807 |
| 44 | 6  | 0 | -3.252846 | 1.018373  | -0.888043 |
| 45 | 6  | 0 | -4.864499 | -0.551240 | 0.248464  |
| 46 | 6  | 0 | -6.053140 | -0.491273 | 0.993858  |
| 47 | 6  | 0 | -6.362755 | -1.462127 | 1.943931  |
| 48 | 6  | 0 | -5.478264 | -2.519144 | 2.173436  |
| 49 | 6  | 0 | -4.291338 | -2.601470 | 1.447711  |
| 50 | 6  | 0 | -3.995826 | -1.630085 | 0.494178  |
| 51 | 1  | 0 | -6.531234 | 0.519503  | -1.590106 |
| 52 | 1  | 0 | -6.035002 | 2.260480  | -3.279859 |
| 53 | 1  | 0 | -3.728012 | 3.193223  | -3.455857 |
| 54 | 1  | 0 | -1.950127 | 2.375436  | -1.908376 |
| 55 | 1  | 0 | -6.728217 | 0.344778  | 0.832628  |
| 56 | 1  | 0 | -7.286170 | -1.387860 | 2.511520  |
| 57 | 1  | 0 | -5.709113 | -3.275893 | 2.918151  |
| 58 | 1  | 0 | -3.582201 | -3.408365 | 1.598094  |
| 59 | 8  | 0 | -2.268287 | 0.672150  | 0.019945  |
| 60 | 8  | 0 | -2.859686 | -1.788391 | -0.282079 |
| 61 | 15 | 0 | -1.550847 | -0.833766 | -0.012494 |
| 62 | 8  | 0 | -0.682980 | -0.951524 | -1.241796 |
| 63 | 8  | 0 | -0.981650 | -1.029263 | 1.364645  |
| 64 | 6  | 0 | 2.318369  | 1.892970  | 2.190503  |
| 65 | 8  | 0 | 3.660461  | 1.718704  | 2.430065  |
| 66 | 6  | 0 | 3.977099  | 0.990038  | 3.615211  |
| 67 | 1  | 0 | 5.062251  | 0.872721  | 3.618192  |
| 68 | 1  | 0 | 3.659160  | 1.546233  | 4.508377  |
| 69 | 1  | 0 | 3.515992  | -0.002536 | 3.626554  |

-----  
***TS<sub>OMe</sub>-Ct(R-en)***

B3LYP-D3/6-31g(d) in gas phase

SCF Done: E(RB3LYP) = -2138.223584 hartree

Sum of electronic and thermal Free Energies = -2137.746950 hartree

The number of imaginary frequency = 1

Imaginary frequency = -349.18

-----  
Center Atomic Atomic Coordinates (Angstroms)

| Number | Number | Type | X         | Y         | Z         |
|--------|--------|------|-----------|-----------|-----------|
| 1      | 6      | 0    | -0.042781 | 3.164601  | 1.998132  |
| 2      | 1      | 0    | -0.842888 | 2.676838  | 1.451105  |
| 3      | 1      | 0    | -0.384048 | 3.827278  | 2.789460  |
| 4      | 6      | 0    | 1.158206  | 3.477421  | 1.373437  |
| 5      | 1      | 0    | 1.808373  | 4.214552  | 1.840773  |
| 6      | 6      | 0    | 1.090069  | 1.794708  | -0.398995 |
| 7      | 1      | 0    | 0.033085  | 1.677579  | -0.192873 |
| 8      | 1      | 0    | 0.702768  | 0.456999  | -1.864600 |
| 9      | 7      | 0    | 1.493025  | 0.937481  | -1.381631 |
| 10     | 6      | 0    | 2.741689  | 0.440476  | -1.731962 |
| 11     | 8      | 0    | 3.707076  | 0.806998  | -0.868225 |
| 12     | 8      | 0    | 2.910941  | -0.274057 | -2.698430 |
| 13     | 1      | 0    | 0.798383  | -1.441206 | 0.465294  |
| 14     | 6      | 0    | 5.072238  | -3.412745 | -0.238579 |
| 15     | 6      | 0    | 5.193840  | -2.449632 | 0.747939  |
| 16     | 6      | 0    | 4.076651  | -1.682861 | 1.139451  |
| 17     | 6      | 0    | 2.825872  | -1.937149 | 0.518797  |
| 18     | 6      | 0    | 2.706984  | -2.908135 | -0.494338 |
| 19     | 6      | 0    | 3.826323  | -3.632599 | -0.863062 |
| 20     | 1      | 0    | 5.079207  | -0.406600 | 2.584193  |
| 21     | 1      | 0    | 5.937055  | -3.995925 | -0.540174 |
| 22     | 1      | 0    | 6.152630  | -2.262177 | 1.224975  |
| 23     | 6      | 0    | 4.127413  | -0.632396 | 2.109598  |
| 24     | 1      | 0    | 1.742425  | -3.059089 | -0.969311 |
| 25     | 1      | 0    | 3.743321  | -4.377389 | -1.648798 |
| 26     | 6      | 0    | 1.745545  | -0.226589 | 1.840517  |
| 27     | 6      | 0    | 3.013782  | 0.081956  | 2.436294  |
| 28     | 1      | 0    | 3.064331  | 0.878613  | 3.167798  |
| 29     | 7      | 0    | 1.727895  | -1.212190 | 0.906842  |
| 30     | 6      | 0    | 0.502041  | 0.355035  | 2.203757  |
| 31     | 1      | 0    | -0.378531 | -0.070449 | 1.734798  |
| 32     | 6      | 0    | 0.323053  | 1.402252  | 3.101175  |
| 33     | 1      | 0    | 1.144376  | 1.757175  | 3.716292  |
| 34     | 1      | 0    | -0.653455 | 1.501219  | 3.565808  |
| 35     | 6      | 0    | 5.035911  | 0.435048  | -1.264910 |
| 36     | 1      | 0    | 5.105392  | -0.642417 | -1.422884 |
| 37     | 1      | 0    | 5.315435  | 0.956379  | -2.185496 |
| 38     | 1      | 0    | 5.676701  | 0.747175  | -0.440037 |
| 39     | 6      | 0    | -4.464407 | 0.559023  | -0.158512 |
| 40     | 6      | 0    | -5.565821 | 1.401791  | -0.375402 |
| 41     | 6      | 0    | -5.401017 | 2.756776  | -0.656652 |
| 42     | 6      | 0    | -4.116209 | 3.297118  | -0.741681 |
| 43     | 6      | 0    | -3.005534 | 2.481247  | -0.531113 |
| 44     | 6      | 0    | -3.179595 | 1.131306  | -0.228147 |
| 45     | 6      | 0    | -4.647059 | -0.880355 | 0.135321  |
| 46     | 6      | 0    | -5.642829 | -1.324131 | 1.020254  |
| 47     | 6      | 0    | -5.826279 | -2.679863 | 1.283883  |
| 48     | 6      | 0    | -5.005943 | -3.626769 | 0.665175  |
| 49     | 6      | 0    | -4.010006 | -3.212678 | -0.217461 |
| 50     | 6      | 0    | -3.840709 | -1.855459 | -0.480838 |
| 51     | 1      | 0    | -6.563319 | 0.972334  | -0.343498 |
| 52     | 1      | 0    | -6.271575 | 3.383862  | -0.826817 |
| 53     | 1      | 0    | -3.976285 | 4.348172  | -0.978747 |
| 54     | 1      | 0    | -1.997599 | 2.875797  | -0.606899 |
| 55     | 1      | 0    | -6.264482 | -0.585218 | 1.518683  |

|    |    |   |           |           |           |
|----|----|---|-----------|-----------|-----------|
| 56 | 1  | 0 | -6.600329 | -2.995869 | 1.977666  |
| 57 | 1  | 0 | -5.138524 | -4.685383 | 0.870833  |
| 58 | 1  | 0 | -3.357345 | -3.919742 | -0.718065 |
| 59 | 8  | 0 | -2.068882 | 0.373147  | 0.095283  |
| 60 | 8  | 0 | -2.910224 | -1.477933 | -1.435315 |
| 61 | 15 | 0 | -1.494147 | -0.792914 | -0.968107 |
| 62 | 8  | 0 | -0.884165 | -0.117876 | -2.159631 |
| 63 | 8  | 0 | -0.693888 | -1.737068 | -0.103186 |
| 64 | 6  | 0 | 1.745477  | 2.825343  | 0.261929  |
| 65 | 8  | 0 | 3.012676  | 3.268842  | -0.044953 |
| 66 | 6  | 0 | 3.177396  | 3.774160  | -1.368650 |
| 67 | 1  | 0 | 2.488329  | 4.608340  | -1.557018 |
| 68 | 1  | 0 | 4.207877  | 4.131297  | -1.429443 |
| 69 | 1  | 0 | 3.020358  | 3.006711  | -2.134385 |

***TS<sub>OME-Ct(S-en)</sub>***

B3LYP-D3/6-31g(d) in gas phase

SCF Done: E(RB3LYP) = -2138.223407 hartree

Sum of electronic and thermal Free Energies = --2137.746753 hartree

The number of imaginary frequency = 1

Imaginary frequency = -340.64

| Center Number | Atomic Number | Atomic Type | Coordinates (Angstroms) |           |           |
|---------------|---------------|-------------|-------------------------|-----------|-----------|
|               |               |             | X                       | Y         | Z         |
| 1             | 6             | 0           | -0.892923               | -3.281730 | -2.515544 |
| 2             | 1             | 0           | 0.031442                | -3.144545 | -1.963396 |
| 3             | 1             | 0           | -0.783039               | -3.835651 | -3.444085 |
| 4             | 6             | 0           | -2.107567               | -3.358113 | -1.850071 |
| 5             | 1             | 0           | -2.961697               | -3.783155 | -2.374086 |
| 6             | 6             | 0           | -1.482393               | -2.092596 | 0.140032  |
| 7             | 1             | 0           | -0.446106               | -2.234837 | -0.143388 |
| 8             | 1             | 0           | -0.596414               | -1.120339 | 1.641515  |
| 9             | 7             | 0           | -1.545492               | -1.334300 | 1.270857  |
| 10            | 6             | 0           | -2.559597               | -0.614837 | 1.889782  |
| 11            | 8             | 0           | -3.716390               | -0.635774 | 1.203196  |
| 12            | 8             | 0           | -2.382629               | -0.015780 | 2.930979  |
| 13            | 1             | 0           | -0.719352               | 1.210697  | -0.195020 |
| 14            | 6             | 0           | -4.601563               | 3.684579  | 0.947846  |
| 15            | 6             | 0           | -4.912240               | 2.873298  | -0.129073 |
| 16            | 6             | 0           | -3.942793               | 2.001488  | -0.668513 |
| 17            | 6             | 0           | -2.644189               | 1.990626  | -0.095607 |
| 18            | 6             | 0           | -2.334209               | 2.802933  | 1.013258  |
| 19            | 6             | 0           | -3.312196               | 3.639583  | 1.520965  |
| 20            | 1             | 0           | -5.185180               | 1.069193  | -2.187281 |
| 21            | 1             | 0           | -5.351806               | 4.352280  | 1.360664  |
| 22            | 1             | 0           | -5.906675               | 2.889813  | -0.567998 |
| 23            | 6             | 0           | -4.190259               | 1.099796  | -1.750124 |
| 24            | 1             | 0           | -1.338874               | 2.747495  | 1.443204  |
| 25            | 1             | 0           | -3.082850               | 4.267876  | 2.376417  |
| 26            | 6             | 0           | -1.886902               | 0.328364  | -1.672736 |
| 27            | 6             | 0           | -3.207126               | 0.285503  | -2.229684 |
| 28            | 1             | 0           | -3.407473               | -0.402211 | -3.041513 |
| 29            | 7             | 0           | -1.684765               | 1.166753  | -0.627335 |
| 30            | 6             | 0           | -0.765000               | -0.394936 | -2.165699 |

|    |    |   |           |           |           |    |   |   |           |           |           |
|----|----|---|-----------|-----------|-----------|----|---|---|-----------|-----------|-----------|
| 31 | 1  | 0 | 0.176283  | -0.225239 | -1.655473 | 6  | 6 | 0 | -2.975198 | -1.077486 | 1.413871  |
| 32 | 6  | 0 | -0.776077 | -1.268713 | -3.244996 | 7  | 1 | 0 | -3.862730 | -0.507134 | 1.174271  |
| 33 | 1  | 0 | -1.628723 | -1.317933 | -3.914433 | 8  | 1 | 0 | -0.954408 | -0.777374 | 1.853846  |
| 34 | 1  | 0 | 0.175147  | -1.497738 | -3.715728 | 9  | 7 | 0 | -1.894178 | -0.329107 | 1.745239  |
| 35 | 6  | 0 | -4.818484 | -0.002584 | 1.873242  | 10 | 6 | 0 | -1.999116 | 1.053317  | 1.764306  |
| 36 | 1  | 0 | -5.052777 | -0.533485 | 2.800773  | 11 | 8 | 0 | -0.799867 | 1.608959  | 2.018797  |
| 37 | 1  | 0 | -4.585230 | 1.038660  | 2.100641  | 12 | 8 | 0 | -3.028169 | 1.675798  | 1.570412  |
| 38 | 1  | 0 | -5.650962 | -0.066962 | 1.172727  | 13 | 1 | 0 | -0.985962 | -0.089710 | -1.244729 |
| 39 | 6  | 0 | 4.551855  | 0.586761  | -0.797160 | 14 | 6 | 0 | -1.278309 | 4.659047  | -1.394636 |
| 40 | 6  | 0 | 5.475510  | 1.291719  | -1.585332 | 15 | 6 | 0 | -2.555890 | 4.140997  | -1.508315 |
| 41 | 6  | 0 | 5.119566  | 1.826669  | -2.821685 | 16 | 6 | 0 | -2.762758 | 2.745175  | -1.513339 |
| 42 | 6  | 0 | 3.815200  | 1.670793  | -3.295670 | 17 | 6 | 0 | -1.637939 | 1.888348  | -1.390491 |
| 43 | 6  | 0 | 2.877888  | 0.976754  | -2.532400 | 18 | 6 | 0 | -0.337125 | 2.417209  | -1.269980 |
| 44 | 6  | 0 | 3.244710  | 0.437314  | -1.299986 | 19 | 6 | 0 | -0.171779 | 3.790604  | -1.278171 |
| 45 | 6  | 0 | 4.947283  | 0.007964  | 0.507219  | 20 | 1 | 0 | -4.922313 | 2.770084  | -1.733819 |
| 46 | 6  | 0 | 6.176604  | -0.651689 | 0.667418  | 21 | 1 | 0 | -1.124372 | 5.733969  | -1.393875 |
| 47 | 6  | 0 | 6.558356  | -1.185197 | 1.896535  | 22 | 1 | 0 | -3.416198 | 4.799260  | -1.596759 |
| 48 | 6  | 0 | 5.707157  | -1.073511 | 2.998916  | 23 | 6 | 0 | -4.046789 | 2.132303  | -1.643513 |
| 49 | 6  | 0 | 4.481107  | -0.424176 | 2.866790  | 24 | 1 | 0 | 0.506802  | 1.746224  | -1.153143 |
| 50 | 6  | 0 | 4.113235  | 0.112885  | 1.635387  | 25 | 1 | 0 | 0.828533  | 4.203450  | -1.184110 |
| 51 | 1  | 0 | 6.482556  | 1.434024  | -1.203125 | 26 | 6 | 0 | -3.038259 | -0.076351 | -1.520391 |
| 52 | 1  | 0 | 5.853951  | 2.373367  | -3.406512 | 27 | 6 | 0 | -4.182999 | 0.775481  | -1.657506 |
| 53 | 1  | 0 | 3.525167  | 2.091700  | -4.254616 | 28 | 1 | 0 | -5.161056 | 0.320826  | -1.759662 |
| 54 | 1  | 0 | 1.858034  | 0.842045  | -2.877767 | 29 | 7 | 0 | -1.831521 | 0.528923  | -1.383706 |
| 55 | 1  | 0 | 6.826526  | -0.760319 | -0.196602 | 30 | 6 | 0 | -3.067663 | -1.496689 | -1.525608 |
| 56 | 1  | 0 | 7.512312  | -1.696508 | 1.990963  | 31 | 1 | 0 | -2.105906 | -1.979962 | -1.387062 |
| 57 | 1  | 0 | 5.994486  | -1.493605 | 3.958861  | 32 | 6 | 0 | -4.200520 | -2.286820 | -1.706077 |
| 58 | 1  | 0 | 3.796346  | -0.316464 | 3.701109  | 33 | 1 | 0 | -5.114948 | -1.857476 | -2.107055 |
| 59 | 8  | 0 | 2.322917  | -0.336658 | -0.618038 | 34 | 1 | 0 | -4.048375 | -3.326372 | -1.974454 |
| 60 | 8  | 0 | 2.937289  | 0.840438  | 1.556540  | 35 | 6 | 0 | -0.813269 | 3.042639  | 2.132947  |
| 61 | 15 | 0 | 1.628415  | 0.203711  | 0.798280  | 36 | 1 | 0 | -1.312786 | 3.339092  | 3.060309  |
| 62 | 8  | 0 | 0.712453  | 1.365614  | 0.496902  | 37 | 1 | 0 | 0.234939  | 3.340475  | 2.150786  |
| 63 | 8  | 0 | 1.111858  | -1.031902 | 1.480203  | 38 | 1 | 0 | -1.323225 | 3.495372  | 1.281996  |
| 64 | 6  | 0 | -2.436856 | -2.777641 | -0.600794 | 39 | 6 | 0 | 4.307051  | -0.543000 | -0.752513 |
| 65 | 8  | 0 | -3.764422 | -2.891311 | -0.252003 | 40 | 6 | 0 | 5.305843  | -0.291568 | -1.706601 |
| 66 | 6  | 0 | -4.006313 | -3.612545 | 0.954808  | 41 | 6 | 0 | 5.424972  | -1.068621 | -2.857027 |
| 67 | 1  | 0 | -5.088962 | -3.608090 | 1.100012  | 42 | 6 | 0 | 4.533009  | -2.120276 | -3.080588 |
| 68 | 1  | 0 | -3.651254 | -4.648456 | 0.868097  | 43 | 6 | 0 | 3.532463  | -2.391866 | -2.149082 |
| 69 | 1  | 0 | -3.528603 | -3.144038 | 1.822212  | 44 | 6 | 0 | 3.426368  | -1.616307 | -0.996239 |

-----  
***TS<sub>OMe</sub>-Tc(R-ex)***

B3LYP-D3/6-31g(d) in gas phase

SCF Done: E(RB3LYP) = -2138.237409 hartree

Sum of electronic and thermal Free Energies = -2137.760565 hartree

The number of imaginary frequency = 1

Imaginary frequency = -352.95

-----

| Center Number | Atomic Number | Atomic Type | Coordinates (Angstroms) |           |           |
|---------------|---------------|-------------|-------------------------|-----------|-----------|
|               |               |             | X                       | Y         | Z         |
| 1             | 6             | 0           | -5.118561               | -2.705984 | 0.181359  |
| 2             | 1             | 0           | -5.414668               | -1.665403 | 0.277159  |
| 3             | 1             | 0           | -5.925282               | -3.374971 | -0.107016 |
| 4             | 6             | 0           | -4.087934               | -3.210787 | 0.966451  |
| 5             | 1             | 0           | -3.995258               | -4.290525 | 1.064107  |

|    |    |   |          |           |           |
|----|----|---|----------|-----------|-----------|
| 45 | 6  | 0 | 4.192510 | 0.279718  | 0.473079  |
| 46 | 6  | 0 | 5.321212 | 0.661572  | 1.215286  |
| 47 | 6  | 0 | 5.198608 | 1.420071  | 2.378371  |
| 48 | 6  | 0 | 3.933355 | 1.798573  | 2.835787  |
| 49 | 6  | 0 | 2.796884 | 1.435645  | 2.114685  |
| 50 | 6  | 0 | 2.935209 | 0.704500  | 0.937739  |
| 51 | 1  | 0 | 5.983337 | 0.542145  | -1.542583 |
| 52 | 1  | 0 | 6.204136 | -0.847437 | -3.581155 |
| 53 | 1  | 0 | 4.613754 | -2.727048 | -3.978368 |
| 54 | 1  | 0 | 2.826783 | -3.204016 | -2.288077 |
| 55 | 1  | 0 | 6.301671 | 0.331647  | 0.882803  |
| 56 | 1  | 0 | 6.087403 | 1.695533  | 2.939227  |
| 57 | 1  | 0 | 3.831060 | 2.366726  | 3.756439  |
| 58 | 1  | 0 | 1.795153 | 1.681854  | 2.447748  |
| 59 | 8  | 0 | 2.490662 | -1.984272 | -0.045314 |
| 60 | 8  | 0 | 1.810041 | 0.447118  | 0.174170  |
| 61 | 15 | 0 | 1.142684 | -1.073266 | 0.212830  |
| 62 | 8  | 0 | 0.225296 | -1.125181 | -0.989592 |

|    |   |   |           |           |          |
|----|---|---|-----------|-----------|----------|
| 63 | 8 | 0 | 0.632653  | -1.405437 | 1.582903 |
| 64 | 6 | 0 | -3.008246 | -2.459211 | 1.477090 |
| 65 | 8 | 0 | -1.931181 | -3.088844 | 2.048958 |
| 66 | 6 | 0 | -1.134338 | -3.893755 | 1.168314 |
| 67 | 1 | 0 | -0.862061 | -3.334008 | 0.268565 |
| 68 | 1 | 0 | -0.225111 | -4.129911 | 1.720645 |
| 69 | 1 | 0 | -1.659523 | -4.819060 | 0.892887 |

***TS<sub>OMe</sub>-Tc(S-ex)***

B3LYP-D3/6-31g(d) in gas phase

SCF Done: E(RB3LYP) = -2138.234980 hartree

Sum of electronic and thermal Free Energies = -2137.758529 hartree

The number of imaginary frequency = 1

Imaginary frequency = -350.80

| Center Number | Atomic Number | Atomic Type | Coordinates (Angstroms) |           |           |
|---------------|---------------|-------------|-------------------------|-----------|-----------|
|               |               |             | X                       | Y         | Z         |
| 1             | 6             | 0           | -3.989578               | 3.679087  | -1.390977 |
| 2             | 1             | 0           | -4.662569               | 2.992184  | -0.886924 |
| 3             | 1             | 0           | -4.486424               | 4.393643  | -2.041898 |
| 4             | 6             | 0           | -2.795475               | 4.055657  | -0.785153 |
| 5             | 1             | 0           | -2.287714               | 4.940339  | -1.162887 |
| 6             | 6             | 0           | -2.588436               | 2.113267  | 0.686090  |
| 7             | 1             | 0           | -3.639022               | 1.873817  | 0.590047  |
| 8             | 1             | 0           | -0.840806               | 1.306102  | 1.524632  |
| 9             | 7             | 0           | -1.884446               | 1.254904  | 1.458944  |
| 10            | 6             | 0           | -2.530453               | 0.181318  | 2.058644  |
| 11            | 8             | 0           | -1.643733               | -0.561924 | 2.737345  |
| 12            | 8             | 0           | -3.723616               | -0.050385 | 1.972250  |
| 13            | 1             | 0           | -1.067922               | -0.362689 | -0.966758 |
| 14            | 6             | 0           | -2.723427               | -4.435327 | 0.876944  |
| 15            | 6             | 0           | -3.786683               | -3.738027 | 0.330894  |
| 16            | 6             | 0           | -3.580082               | -2.486274 | -0.286615 |
| 17            | 6             | 0           | -2.263036               | -1.960338 | -0.337189 |
| 18            | 6             | 0           | -1.184889               | -2.660704 | 0.241504  |
| 19            | 6             | 0           | -1.423226               | -3.888594 | 0.832690  |
| 20            | 1             | 0           | -5.641895               | -2.084252 | -0.837232 |
| 21            | 1             | 0           | -2.888473               | -5.399629 | 1.347976  |
| 22            | 1             | 0           | -4.794430               | -4.143231 | 0.370572  |
| 23            | 6             | 0           | -4.623945               | -1.705103 | -0.874316 |
| 24            | 1             | 0           | -0.192048               | -2.223534 | 0.233655  |
| 25            | 1             | 0           | -0.594747               | -4.431433 | 1.278419  |
| 26            | 6             | 0           | -3.021336               | 0.002468  | -1.526991 |
| 27            | 6             | 0           | -4.360018               | -0.508410 | -1.471859 |
| 28            | 1             | 0           | -5.157710               | 0.072961  | -1.918521 |
| 29            | 7             | 0           | -2.051289               | -0.749596 | -0.946036 |
| 30            | 6             | 0           | -2.619816               | 1.207974  | -2.160403 |
| 31            | 1             | 0           | -1.552845               | 1.403795  | -2.137478 |
| 32            | 6             | 0           | -3.451454               | 2.130872  | -2.787310 |
| 33            | 1             | 0           | -4.485759               | 1.884332  | -3.013306 |
| 34            | 1             | 0           | -2.997139               | 2.820175  | -3.490209 |
| 35            | 6             | 0           | -2.207604               | -1.667961 | 3.459241  |
| 36            | 1             | 0           | -2.778266               | -2.316323 | 2.791971  |
| 37            | 1             | 0           | -1.353187               | -2.201933 | 3.874842  |

|    |    |   |           |           |           |
|----|----|---|-----------|-----------|-----------|
| 38 | 1  | 0 | -2.859802 | -1.304016 | 4.258903  |
| 39 | 6  | 0 | 4.179810  | -1.073763 | -0.700130 |
| 40 | 6  | 0 | 5.060753  | -1.728119 | -1.575899 |
| 41 | 6  | 0 | 4.659695  | -2.836383 | -2.318950 |
| 42 | 6  | 0 | 3.351828  | -3.312212 | -2.203767 |
| 43 | 6  | 0 | 2.456793  | -2.680232 | -1.342252 |
| 44 | 6  | 0 | 2.868707  | -1.577462 | -0.595211 |
| 45 | 6  | 0 | 4.622326  | 0.096068  | 0.092178  |
| 46 | 6  | 0 | 5.876117  | 0.116339  | 0.723742  |
| 47 | 6  | 0 | 6.300265  | 1.222092  | 1.457730  |
| 48 | 6  | 0 | 5.467480  | 2.337096  | 1.580887  |
| 49 | 6  | 0 | 4.217879  | 2.341712  | 0.963818  |
| 50 | 6  | 0 | 3.807274  | 1.235372  | 0.223580  |
| 51 | 1  | 0 | 6.069929  | -1.340052 | -1.683154 |
| 52 | 1  | 0 | 5.361421  | -3.318562 | -2.993715 |
| 53 | 1  | 0 | 3.026197  | -4.170734 | -2.784856 |
| 54 | 1  | 0 | 1.436559  | -3.032751 | -1.233423 |
| 55 | 1  | 0 | 6.511668  | -0.761843 | 0.649298  |
| 56 | 1  | 0 | 7.272368  | 1.208644  | 1.942623  |
| 57 | 1  | 0 | 5.786786  | 3.199300  | 2.159827  |
| 58 | 1  | 0 | 3.546886  | 3.190799  | 1.040791  |
| 59 | 8  | 0 | 1.988978  | -1.040947 | 0.329181  |
| 60 | 8  | 0 | 2.606634  | 1.303618  | -0.462173 |
| 61 | 15 | 0 | 1.303633  | 0.452537  | 0.083853  |
| 62 | 8  | 0 | 0.356139  | 0.381768  | -1.094525 |
| 63 | 8  | 0 | 0.832340  | 0.943854  | 1.418138  |
| 64 | 6  | 0 | -2.067990 | 3.273102  | 0.136955  |
| 65 | 8  | 0 | -0.804800 | 3.628513  | 0.537896  |
| 66 | 6  | 0 | 0.183132  | 3.791865  | -0.487721 |
| 67 | 1  | 0 | 1.139511  | 3.860796  | 0.031824  |
| 68 | 1  | 0 | 0.205871  | 2.921725  | -1.150736 |
| 69 | 1  | 0 | 0.016009  | 4.708901  | -1.068270 |

***TS<sub>OMe</sub>-Ti(R-ex)***

B3LYP-D3/6-31g(d) in gas phase

SCF Done: E(RB3LYP) = -2138.234087 hartree

Sum of electronic and thermal Free Energies = -2137.756269 hartree

The number of imaginary frequency = 1

Imaginary frequency = -350.73

| Center Number | Atomic Number | Atomic Type | Coordinates (Angstroms) |           |           |
|---------------|---------------|-------------|-------------------------|-----------|-----------|
|               |               |             | X                       | Y         | Z         |
| 1             | 6             | 0           | -4.903647               | -2.866889 | 0.066822  |
| 2             | 1             | 0           | -5.214529               | -1.827724 | 0.126900  |
| 3             | 1             | 0           | -5.691746               | -3.551921 | -0.235321 |
| 4             | 6             | 0           | -3.896898               | -3.342679 | 0.899702  |
| 5             | 1             | 0           | -3.791186               | -4.419415 | 1.015122  |
| 6             | 6             | 0           | -2.835610               | -1.185624 | 1.390541  |
| 7             | 1             | 0           | -3.725782               | -0.634695 | 1.123129  |
| 8             | 1             | 0           | -0.825633               | -0.904411 | 1.873670  |
| 9             | 7             | 0           | -1.760821               | -0.443645 | 1.758062  |
| 10            | 6             | 0           | -1.743817               | 0.937035  | 1.855353  |
| 11            | 8             | 0           | -2.963286               | 1.479041  | 1.616521  |
| 12            | 8             | 0           | -0.752053               | 1.583048  | 2.123733  |

|    |    |   |           |           |           |
|----|----|---|-----------|-----------|-----------|
| 13 | 1  | 0 | -0.885463 | -0.088292 | -1.165689 |
| 14 | 6  | 0 | -1.513730 | 4.647035  | -1.333797 |
| 15 | 6  | 0 | -2.722111 | 4.034928  | -1.613702 |
| 16 | 6  | 0 | -2.825162 | 2.627578  | -1.615277 |
| 17 | 6  | 0 | -1.665349 | 1.854089  | -1.339088 |
| 18 | 6  | 0 | -0.438756 | 2.480813  | -1.041404 |
| 19 | 6  | 0 | -0.377150 | 3.863224  | -1.042100 |
| 20 | 1  | 0 | -4.945606 | 2.495762  | -2.065095 |
| 21 | 1  | 0 | -1.438857 | 5.730300  | -1.330807 |
| 22 | 1  | 0 | -3.608366 | 4.626377  | -1.829505 |
| 23 | 6  | 0 | -4.044007 | 1.923303  | -1.860586 |
| 24 | 1  | 0 | 0.428616  | 1.876248  | -0.797748 |
| 25 | 1  | 0 | 0.564982  | 4.348783  | -0.805699 |
| 26 | 6  | 0 | -2.903080 | -0.207730 | -1.586106 |
| 27 | 6  | 0 | -4.087615 | 0.560433  | -1.840478 |
| 28 | 1  | 0 | -5.017494 | 0.037205  | -2.027752 |
| 29 | 7  | 0 | -1.758169 | 0.482993  | -1.346958 |
| 30 | 6  | 0 | -2.841429 | -1.626005 | -1.577743 |
| 31 | 1  | 0 | -1.862470 | -2.047921 | -1.377540 |
| 32 | 6  | 0 | -3.919370 | -2.482249 | -1.791361 |
| 33 | 1  | 0 | -4.836074 | -2.119123 | -2.248649 |
| 34 | 1  | 0 | -3.698786 | -3.519959 | -2.016098 |
| 35 | 6  | 0 | -3.023843 | 2.905348  | 1.791049  |
| 36 | 1  | 0 | -2.273858 | 3.402073  | 1.174039  |
| 37 | 1  | 0 | -4.028562 | 3.190436  | 1.477858  |
| 38 | 1  | 0 | -2.860748 | 3.163796  | 2.841258  |
| 39 | 6  | 0 | 4.191873  | 0.467258  | 0.527274  |
| 40 | 6  | 0 | 5.274850  | 0.929766  | 1.292091  |
| 41 | 6  | 0 | 5.073858  | 1.720261  | 2.422236  |
| 42 | 6  | 0 | 3.776638  | 2.058925  | 2.818245  |
| 43 | 6  | 0 | 2.681900  | 1.613480  | 2.078598  |
| 44 | 6  | 0 | 2.901317  | 0.836222  | 0.944558  |
| 45 | 6  | 0 | 4.391963  | -0.357612 | -0.686799 |
| 46 | 6  | 0 | 5.407004  | -0.048800 | -1.607046 |
| 47 | 6  | 0 | 5.610730  | -0.814040 | -2.753399 |
| 48 | 6  | 0 | 4.787658  | -1.913071 | -3.009763 |
| 49 | 6  | 0 | 3.772127  | -2.241907 | -2.113882 |
| 50 | 6  | 0 | 3.581361  | -1.477087 | -0.964350 |
| 51 | 1  | 0 | 6.281723  | 0.642386  | 1.001566  |
| 52 | 1  | 0 | 5.928216  | 2.058650  | 3.002167  |
| 53 | 1  | 0 | 3.616398  | 2.663351  | 3.707048  |
| 54 | 1  | 0 | 1.657763  | 1.841204  | 2.353808  |
| 55 | 1  | 0 | 6.029507  | 0.821890  | -1.419504 |
| 56 | 1  | 0 | 6.401251  | -0.546576 | -3.449111 |
| 57 | 1  | 0 | 4.933625  | -2.512257 | -3.904449 |
| 58 | 1  | 0 | 3.119406  | -3.093007 | -2.277212 |
| 59 | 8  | 0 | 1.814472  | 0.479554  | 0.161644  |
| 60 | 8  | 0 | 2.638396  | -1.909754 | -0.049615 |
| 61 | 15 | 0 | 1.246811  | -1.075420 | 0.225516  |
| 62 | 8  | 0 | 0.778361  | -1.448163 | 1.600711  |
| 63 | 8  | 0 | 0.303631  | -1.174586 | -0.955713 |
| 64 | 6  | 0 | -2.849307 | -2.569747 | 1.443672  |
| 65 | 8  | 0 | -1.778983 | -3.179922 | 2.046660  |
| 66 | 6  | 0 | -0.943831 | -3.975367 | 1.191294  |
| 67 | 1  | 0 | -0.665527 | -3.417597 | 0.292507  |
| 68 | 1  | 0 | -0.041812 | -4.183476 | 1.766061  |
| 69 | 1  | 0 | -1.441917 | -4.915307 | 0.915714  |

-----  
***TS<sub>OME-Tt(S-ex)</sub>***

B3LYP-D3/6-31g(d) in gas phase

SCF Done: E(RB3LYP) = -2138.231474 hartree

Sum of electronic and thermal Free Energies = -2137.753944 hartree

The number of imaginary frequency = 1

Imaginary frequency = -357.67  
 -----

| Center Number | Atomic Number | Atomic Type | Coordinates (Angstroms) |           |           |
|---------------|---------------|-------------|-------------------------|-----------|-----------|
|               |               |             | X                       | Y         | Z         |
| 1             | 6             | 0           | -1.641931               | 3.878263  | -1.952548 |
| 2             | 1             | 0           | -2.611533               | 3.410991  | -1.802456 |
| 3             | 1             | 0           | -1.623937               | 4.625450  | -2.742014 |
| 4             | 6             | 0           | -0.766569               | 4.034807  | -0.885135 |
| 5             | 1             | 0           | 0.068640                | 4.723285  | -0.995330 |
| 6             | 6             | 0           | -1.670784               | 2.263563  | 0.530740  |
| 7             | 1             | 0           | -2.624977               | 2.355041  | 0.031637  |
| 8             | 1             | 0           | -0.654267               | 0.912052  | 1.772975  |
| 9             | 7             | 0           | -1.589123               | 1.261822  | 1.450702  |
| 10            | 6             | 0           | -2.659272               | 0.482858  | 1.863143  |
| 11            | 8             | 0           | -3.828706               | 0.896334  | 1.311515  |
| 12            | 8             | 0           | -2.554706               | -0.451102 | 2.628421  |
| 13            | 1             | 0           | -1.068571               | -0.968320 | -0.524006 |
| 14            | 6             | 0           | -5.136736               | -3.326428 | 0.057027  |
| 15            | 6             | 0           | -5.359702               | -2.315253 | -0.860148 |
| 16            | 6             | 0           | -4.315666               | -1.435239 | -1.217067 |
| 17            | 6             | 0           | -3.037160               | -1.616028 | -0.625591 |
| 18            | 6             | 0           | -2.815331               | -2.639786 | 0.318308  |
| 19            | 6             | 0           | -3.863113               | -3.480848 | 0.646638  |
| 20            | 1             | 0           | -5.435731               | -0.186276 | -2.596360 |
| 21            | 1             | 0           | -5.942791               | -4.000689 | 0.330508  |
| 22            | 1             | 0           | -6.338583               | -2.181716 | -1.313701 |
| 23            | 6             | 0           | -4.465012               | -0.350073 | -2.134562 |
| 24            | 1             | 0           | -1.833686               | -2.731222 | 0.771174  |
| 25            | 1             | 0           | -3.702636               | -4.268066 | 1.377161  |
| 26            | 6             | 0           | -2.128072               | 0.264268  | -1.837175 |
| 27            | 6             | 0           | -3.417528               | 0.472128  | -2.432231 |
| 28            | 1             | 0           | -3.544842               | 1.292698  | -3.127825 |
| 29            | 7             | 0           | -2.013300               | -0.768273 | -0.966871 |
| 30            | 6             | 0           | -0.980745               | 1.062495  | -2.088789 |
| 31            | 1             | 0           | -0.076670               | 0.800642  | -1.548283 |
| 32            | 6             | 0           | -0.942402               | 2.145603  | -2.965040 |
| 33            | 1             | 0           | -1.694674               | 2.257665  | -3.741545 |
| 34            | 1             | 0           | 0.033035                | 2.532398  | -3.238621 |
| 35            | 6             | 0           | -4.987511               | 0.180767  | 1.772132  |
| 36            | 1             | 0           | -5.817932               | 0.566471  | 1.179734  |
| 37            | 1             | 0           | -4.868993               | -0.892087 | 1.614537  |
| 38            | 1             | 0           | -5.152484               | 0.374545  | 2.835974  |
| 39            | 6             | 0           | 4.388045                | -0.019487 | -0.235788 |
| 40            | 6             | 0           | 5.643800                | 0.607131  | -0.187929 |
| 41            | 6             | 0           | 5.760488                | 1.993541  | -0.113013 |
| 42            | 6             | 0           | 4.610841                | 2.786254  | -0.071753 |
| 43            | 6             | 0           | 3.350795                | 2.191433  | -0.117410 |
| 44            | 6             | 0           | 3.247125                | 0.804896  | -0.208601 |

|    |    |   |           |           |           |
|----|----|---|-----------|-----------|-----------|
| 45 | 6  | 0 | 4.271752  | -1.493259 | -0.319144 |
| 46 | 6  | 0 | 5.108184  | -2.243148 | -1.161836 |
| 47 | 6  | 0 | 5.013418  | -3.631503 | -1.230872 |
| 48 | 6  | 0 | 4.066379  | -4.304177 | -0.454507 |
| 49 | 6  | 0 | 3.223247  | -3.583815 | 0.389573  |
| 50 | 6  | 0 | 3.332435  | -2.196774 | 0.457698  |
| 51 | 1  | 0 | 6.535770  | -0.013413 | -0.187740 |
| 52 | 1  | 0 | 6.744813  | 2.451664  | -0.070081 |
| 53 | 1  | 0 | 4.693312  | 3.867477  | 0.002775  |
| 54 | 1  | 0 | 2.438422  | 2.774465  | -0.066106 |
| 55 | 1  | 0 | 5.827551  | -1.716898 | -1.783373 |
| 56 | 1  | 0 | 5.669504  | -4.185738 | -1.896364 |
| 57 | 1  | 0 | 3.981578  | -5.386173 | -0.507499 |
| 58 | 1  | 0 | 2.478616  | -4.071845 | 1.009314  |
| 59 | 8  | 0 | 1.990390  | 0.244580  | -0.365689 |
| 60 | 8  | 0 | 2.549201  | -1.520331 | 1.378483  |
| 61 | 15 | 0 | 1.280579  | -0.615842 | 0.864700  |
| 62 | 8  | 0 | 0.889538  | 0.289958  | 1.998279  |
| 63 | 8  | 0 | 0.248563  | -1.476730 | 0.174456  |
| 64 | 6  | 0 | -0.693130 | 3.211057  | 0.262331  |
| 65 | 8  | 0 | 0.461355  | 3.358704  | 0.980220  |
| 66 | 6  | 0 | 0.405452  | 3.355390  | 2.417480  |
| 67 | 1  | 0 | 1.204814  | 4.024856  | 2.744644  |
| 68 | 1  | 0 | -0.559071 | 3.740154  | 2.768707  |
| 69 | 1  | 0 | 0.590753  | 2.352265  | 2.803773  |

(R=I)

*TS<sub>r</sub>-Cc(R-en)*

B3LYP-D3/6-31g(d) in gas phase

SCF Done: E(RB3LYP) = -2034.445573 hartree

Sum of electronic and thermal Free Energies = -2034.012039 hartree

The number of imaginary frequency = 1

Imaginary frequency = -375.39

| Center Number | Atomic Number | Atomic Type | Coordinates (Angstroms) |           |           |
|---------------|---------------|-------------|-------------------------|-----------|-----------|
|               |               |             | X                       | Y         | Z         |
| 1             | 6             | 0           | 0.029874                | -2.775568 | 2.053027  |
| 2             | 1             | 0           | 0.872717                | -2.383033 | 1.493833  |
| 3             | 1             | 0           | 0.303378                | -3.506693 | 2.810210  |
| 4             | 6             | 0           | -1.218098               | -2.934857 | 1.452029  |
| 5             | 1             | 0           | -1.912396               | -3.617729 | 1.933698  |
| 6             | 6             | 0           | -0.948764               | -1.237654 | -0.288656 |
| 7             | 1             | 0           | 0.116315                | -1.269623 | -0.078617 |
| 8             | 1             | 0           | -0.378142               | 0.033917  | -1.750224 |
| 9             | 7             | 0           | -1.226554               | -0.329879 | -1.259365 |
| 10            | 6             | 0           | -2.409430               | 0.373867  | -1.467566 |
| 11            | 8             | 0           | -2.300066               | 1.058497  | -2.621870 |
| 12            | 8             | 0           | -3.363246               | 0.414729  | -0.719894 |
| 13            | 1             | 0           | -0.009185               | 1.939579  | 0.684840  |
| 14            | 6             | 0           | -3.848273               | 4.631642  | -0.104506 |
| 15            | 6             | 0           | -4.187417               | 3.645699  | 0.806162  |
| 16            | 6             | 0           | -3.229749               | 2.699742  | 1.226253  |
| 17            | 6             | 0           | -1.916008               | 2.783901  | 0.697939  |
| 18            | 6             | 0           | -1.572405               | 3.782091  | -0.235071 |

|    |    |   |           |           |           |
|----|----|---|-----------|-----------|-----------|
| 19 | 6  | 0 | -2.536910 | 4.695532  | -0.623993 |
| 20 | 1  | 0 | -4.505882 | 1.549043  | 2.554465  |
| 21 | 1  | 0 | -4.590827 | 5.356544  | -0.424184 |
| 22 | 1  | 0 | -5.196910 | 3.582451  | 1.203592  |
| 23 | 6  | 0 | -3.502315 | 1.640551  | 2.148033  |
| 24 | 1  | 0 | -0.561306 | 3.808213  | -0.630706 |
| 25 | 1  | 0 | -2.280646 | 5.469029  | -1.342255 |
| 26 | 6  | 0 | -1.208830 | 0.858353  | 1.972748  |
| 27 | 6  | 0 | -2.534957 | 0.749663  | 2.506246  |
| 28 | 1  | 0 | -2.753269 | -0.054398 | 3.197823  |
| 29 | 7  | 0 | -0.976575 | 1.868072  | 1.095664  |
| 30 | 6  | 0 | -0.098340 | 0.048446  | 2.331888  |
| 31 | 1  | 0 | 0.855112  | 0.330059  | 1.896531  |
| 32 | 6  | 0 | -0.122347 | -1.048470 | 3.191411  |
| 33 | 1  | 0 | -1.012413 | -1.276830 | 3.770484  |
| 34 | 1  | 0 | 0.805908  | -1.304004 | 3.694767  |
| 35 | 6  | 0 | 5.154064  | 0.215814  | 0.086682  |
| 36 | 6  | 0 | 6.251738  | 0.372984  | 0.948485  |
| 37 | 6  | 0 | 6.740895  | 1.636242  | 1.275599  |
| 38 | 6  | 0 | 6.132644  | 2.777498  | 0.745646  |
| 39 | 6  | 0 | 5.041365  | 2.648656  | -0.112220 |
| 40 | 6  | 0 | 4.566100  | 1.380895  | -0.440234 |
| 41 | 6  | 0 | 4.646044  | -1.126355 | -0.276494 |
| 42 | 6  | 0 | 5.525535  | -2.174635 | -0.590727 |
| 43 | 6  | 0 | 5.054992  | -3.439897 | -0.938208 |
| 44 | 6  | 0 | 3.680038  | -3.678795 | -0.992146 |
| 45 | 6  | 0 | 2.785231  | -2.654134 | -0.685327 |
| 46 | 6  | 0 | 3.264443  | -1.397063 | -0.317022 |
| 47 | 1  | 0 | 6.708785  | -0.514349 | 1.378042  |
| 48 | 1  | 0 | 7.587777  | 1.730229  | 1.949563  |
| 49 | 1  | 0 | 6.504129  | 3.765929  | 1.001468  |
| 50 | 1  | 0 | 4.547122  | 3.512121  | -0.544203 |
| 51 | 1  | 0 | 6.593822  | -1.977039 | -0.582010 |
| 52 | 1  | 0 | 5.758555  | -4.230460 | -1.183117 |
| 53 | 1  | 0 | 3.302122  | -4.655948 | -1.279576 |
| 54 | 1  | 0 | 1.713585  | -2.815990 | -0.734773 |
| 55 | 8  | 0 | 3.543708  | 1.276077  | -1.369735 |
| 56 | 8  | 0 | 2.360448  | -0.434726 | 0.099695  |
| 57 | 15 | 0 | 2.028587  | 0.898006  | -0.867743 |
| 58 | 8  | 0 | 1.498465  | 1.941703  | 0.086670  |
| 59 | 8  | 0 | 1.237989  | 0.456763  | -2.064126 |
| 60 | 6  | 0 | -3.429176 | 1.888340  | -2.935887 |
| 61 | 1  | 0 | -3.586956 | 2.637116  | -2.156027 |
| 62 | 1  | 0 | -3.177512 | 2.366886  | -3.882728 |
| 63 | 1  | 0 | -4.331790 | 1.279447  | -3.039619 |
| 64 | 6  | 0 | -1.721920 | -2.180749 | 0.365114  |
| 65 | 53 | 0 | -3.708029 | -2.731824 | -0.261516 |

*TS<sub>r</sub>-Cc(S-en)*

B3LYP-D3/6-31g(d) in gas phase

SCF Done: E(RB3LYP) = -2034.444487 hartree

Sum of electronic and thermal Free Energies = -2034.011631 hartree

The number of imaginary frequency = 1

Imaginary frequency = -358.11

| Center Number | Atomic Number | Atomic Type | Coordinates (Angstroms) |           |           |
|---------------|---------------|-------------|-------------------------|-----------|-----------|
|               |               |             | X                       | Y         | Z         |
| 1             | 6             | 0           | 0.306854                | -3.363426 | 1.339394  |
| 2             | 1             | 0           | -0.577404               | -2.921204 | 0.890921  |
| 3             | 1             | 0           | 0.107258                | -4.241852 | 1.948204  |
| 4             | 6             | 0           | 1.543552                | -3.298551 | 0.704896  |
| 5             | 1             | 0           | 2.301972                | -4.005637 | 1.029527  |
| 6             | 6             | 0           | 1.081940                | -1.316975 | -0.641913 |
| 7             | 1             | 0           | 0.027087                | -1.498570 | -0.452203 |
| 8             | 1             | 0           | 0.308681                | 0.170277  | -1.722120 |
| 9             | 7             | 0           | 1.228088                | -0.200766 | -1.398244 |
| 10            | 6             | 0           | 2.330498                | 0.637203  | -1.526463 |
| 11            | 8             | 0           | 2.060626                | 1.548952  | -2.482159 |
| 12            | 8             | 0           | 3.348243                | 0.600104  | -0.868646 |
| 13            | 1             | 0           | 0.092940                | 1.608118  | 1.016274  |
| 14            | 6             | 0           | 3.805177                | 4.548182  | 0.713628  |
| 15            | 6             | 0           | 4.220816                | 3.391981  | 1.350735  |
| 16            | 6             | 0           | 3.312865                | 2.337919  | 1.583183  |
| 17            | 6             | 0           | 1.971640                | 2.491116  | 1.148016  |
| 18            | 6             | 0           | 1.548071                | 3.665961  | 0.495679  |
| 19            | 6             | 0           | 2.464961                | 4.681856  | 0.288747  |
| 20            | 1             | 0           | 4.686752                | 0.963810  | 2.552557  |
| 21            | 1             | 0           | 4.509294                | 5.355874  | 0.537798  |
| 22            | 1             | 0           | 5.251836                | 3.277983  | 1.674726  |
| 23            | 6             | 0           | 3.661134                | 1.108186  | 2.223987  |
| 24            | 1             | 0           | 0.515067                | 3.743059  | 0.168956  |
| 25            | 1             | 0           | 2.148524                | 5.592809  | -0.211209 |
| 26            | 6             | 0           | 1.385875                | 0.299380  | 1.971238  |
| 27            | 6             | 0           | 2.736716                | 0.123538  | 2.413273  |
| 28            | 1             | 0           | 3.011481                | -0.810005 | 2.888235  |
| 29            | 7             | 0           | 1.081023                | 1.470362  | 1.358774  |
| 30            | 6             | 0           | 0.316547                | -0.616905 | 2.166921  |
| 31            | 1             | 0           | -0.648831               | -0.290113 | 1.798740  |
| 32            | 6             | 0           | 0.387051                | -1.853155 | 2.800823  |
| 33            | 1             | 0           | 1.287053                | -2.154406 | 3.328355  |
| 34            | 1             | 0           | -0.529646               | -2.248474 | 3.229324  |
| 35            | 6             | 0           | 3.101232                | 2.515144  | -2.697660 |
| 36            | 1             | 0           | 4.016331                | 2.019214  | -3.033887 |
| 37            | 1             | 0           | 2.718312                | 3.179959  | -3.472487 |
| 38            | 1             | 0           | 3.308648                | 3.071286  | -1.780612 |
| 39            | 6             | 0           | -5.016140               | -0.303558 | 0.741920  |
| 40            | 6             | 0           | -6.082955               | -0.355386 | 1.653925  |
| 41            | 6             | 0           | -5.867982               | -0.515309 | 3.021345  |
| 42            | 6             | 0           | -4.563686               | -0.619089 | 3.509314  |
| 43            | 6             | 0           | -3.486685               | -0.568645 | 2.625617  |
| 44            | 6             | 0           | -3.708916               | -0.418285 | 1.256279  |
| 45            | 6             | 0           | -5.268005               | -0.146290 | -0.708550 |
| 46            | 6             | 0           | -6.297930               | -0.853254 | -1.350795 |
| 47            | 6             | 0           | -6.548261               | -0.690426 | -2.711884 |
| 48            | 6             | 0           | -5.763069               | 0.186819  | -3.465116 |
| 49            | 6             | 0           | -4.734010               | 0.899349  | -2.851612 |
| 50            | 6             | 0           | -4.498677               | 0.735423  | -1.488505 |
| 51            | 1             | 0           | -7.095034               | -0.246909 | 1.274164  |
| 52            | 1             | 0           | -6.713323               | -0.545292 | 3.702898  |
| 53            | 1             | 0           | -4.382445               | -0.733470 | 4.574581  |

|    |    |   |           |           |           |
|----|----|---|-----------|-----------|-----------|
| 54 | 1  | 0 | -2.466186 | -0.641837 | 2.985408  |
| 55 | 1  | 0 | -6.891573 | -1.553631 | -0.769707 |
| 56 | 1  | 0 | -7.346563 | -1.254678 | -3.185802 |
| 57 | 1  | 0 | -5.947337 | 0.312721  | -4.528406 |
| 58 | 1  | 0 | -4.104724 | 1.588154  | -3.404728 |
| 59 | 8  | 0 | -2.623046 | -0.486177 | 0.401722  |
| 60 | 8  | 0 | -3.532660 | 1.522045  | -0.880979 |
| 61 | 15 | 0 | -2.097986 | 0.842611  | -0.466574 |
| 62 | 8  | 0 | -1.416761 | 1.815551  | 0.465469  |
| 63 | 8  | 0 | -1.381601 | 0.273485  | -1.659210 |
| 64 | 6  | 0 | 1.955889  | -2.297764 | -0.208106 |
| 65 | 53 | 0 | 3.968159  | -2.526140 | -0.938190 |

**TS<sub>r</sub>-Ct(R-en)**

B3LYP-D3/6-31g(d) in gas phase

SCF Done: E(RB3LYP) = -2034.441589 hartree

Sum of electronic and thermal Free Energies = -2034.008199 hartree

The number of imaginary frequency = 1

Imaginary frequency = -364.98

| Center Number | Atomic Number | Atomic Type | Coordinates (Angstroms) |           |           |
|---------------|---------------|-------------|-------------------------|-----------|-----------|
|               |               |             | X                       | Y         | Z         |
| 1             | 6             | 0           | 0.030788                | -2.654715 | 2.091799  |
| 2             | 1             | 0           | 0.879853                | -2.296162 | 1.519853  |
| 3             | 1             | 0           | 0.292084                | -3.349655 | 2.886224  |
| 4             | 6             | 0           | -1.216486               | -2.826294 | 1.494884  |
| 5             | 1             | 0           | -1.919094               | -3.480325 | 2.003747  |
| 6             | 6             | 0           | -0.927348               | -1.211736 | -0.322375 |
| 7             | 1             | 0           | 0.133506                | -1.240459 | -0.089198 |
| 8             | 1             | 0           | -0.302954               | -0.049221 | -1.848032 |
| 9             | 7             | 0           | -1.168340               | -0.353119 | -1.344759 |
| 10            | 6             | 0           | -2.315339               | 0.334658  | -1.742110 |
| 11            | 8             | 0           | -3.252413               | 0.358365  | -0.778169 |
| 12            | 8             | 0           | -2.400662               | 0.894479  | -2.812304 |
| 13            | 1             | 0           | -0.011947               | 1.956131  | 0.453179  |
| 14            | 6             | 0           | -3.823973               | 4.699281  | -0.328334 |
| 15            | 6             | 0           | -4.125400               | 3.815079  | 0.692973  |
| 16            | 6             | 0           | -3.176916               | 2.859283  | 1.113849  |
| 17            | 6             | 0           | -1.903970               | 2.841411  | 0.485978  |
| 18            | 6             | 0           | -1.601838               | 3.736139  | -0.559265 |
| 19            | 6             | 0           | -2.561305               | 4.650433  | -0.957416 |
| 20            | 1             | 0           | -4.401911               | 1.855787  | 2.601873  |
| 21            | 1             | 0           | -4.560329               | 5.427967  | -0.653292 |
| 22            | 1             | 0           | -5.099974               | 3.835366  | 1.174259  |
| 23            | 6             | 0           | -3.428185               | 1.872092  | 2.118444  |
| 24            | 1             | 0           | -0.626904               | 3.682624  | -1.034463 |
| 25            | 1             | 0           | -2.338382               | 5.337568  | -1.768078 |
| 26            | 6             | 0           | -1.176747               | 0.993352  | 1.860494  |
| 27            | 6             | 0           | -2.476471               | 0.959866  | 2.466460  |
| 28            | 1             | 0           | -2.677850               | 0.213553  | 3.224733  |
| 29            | 7             | 0           | -0.967659               | 1.928641  | 0.899369  |
| 30            | 6             | 0           | -0.068713               | 0.189195  | 2.238632  |
| 31            | 1             | 0           | 0.878275                | 0.434286  | 1.769387  |
| 32            | 6             | 0           | -0.089278               | -0.860747 | 3.153407  |

|    |    |   |           |           |           |
|----|----|---|-----------|-----------|-----------|
| 33 | 1  | 0 | -0.972161 | -1.056206 | 3.755040  |
| 34 | 1  | 0 | 0.845056  | -1.107749 | 3.649192  |
| 35 | 6  | 0 | -4.512423 | 0.914258  | -1.187865 |
| 36 | 1  | 0 | -4.383210 | 1.945136  | -1.522021 |
| 37 | 1  | 0 | -4.943012 | 0.314318  | -1.994259 |
| 38 | 1  | 0 | -5.144895 | 0.872043  | -0.301607 |
| 39 | 6  | 0 | 4.698830  | -1.118978 | -0.178948 |
| 40 | 6  | 0 | 5.597164  | -2.174659 | -0.401499 |
| 41 | 6  | 0 | 5.148595  | -3.464181 | -0.682882 |
| 42 | 6  | 0 | 3.778111  | -3.721351 | -0.762469 |
| 43 | 6  | 0 | 2.864986  | -2.689837 | -0.545657 |
| 44 | 6  | 0 | 3.321959  | -1.407923 | -0.241049 |
| 45 | 6  | 0 | 5.181285  | 0.250204  | 0.110865  |
| 46 | 6  | 0 | 6.251378  | 0.476892  | 0.991587  |
| 47 | 6  | 0 | 6.716494  | 1.764892  | 1.250192  |
| 48 | 6  | 0 | 6.111303  | 2.861621  | 0.630352  |
| 49 | 6  | 0 | 5.047258  | 2.663657  | -0.248341 |
| 50 | 6  | 0 | 4.596005  | 1.371331  | -0.506982 |
| 51 | 1  | 0 | 6.662847  | -1.964934 | -0.375014 |
| 52 | 1  | 0 | 5.866388  | -4.260475 | -0.857959 |
| 53 | 1  | 0 | 3.418355  | -4.718307 | -1.001001 |
| 54 | 1  | 0 | 1.796553  | -2.864474 | -0.618092 |
| 55 | 1  | 0 | 6.705728  | -0.374997 | 1.490229  |
| 56 | 1  | 0 | 7.542273  | 1.913101  | 1.940407  |
| 57 | 1  | 0 | 6.464166  | 3.869224  | 0.831976  |
| 58 | 1  | 0 | 4.556672  | 3.490922  | -0.749754 |
| 59 | 8  | 0 | 2.398126  | -0.430760 | 0.088995  |
| 60 | 8  | 0 | 3.602706  | 1.194339  | -1.457126 |
| 61 | 15 | 0 | 2.078169  | 0.826518  | -0.979176 |
| 62 | 8  | 0 | 1.330143  | 0.288403  | -2.162591 |
| 63 | 8  | 0 | 1.500231  | 1.922967  | -0.115523 |
| 64 | 6  | 0 | -1.708025 | -2.121250 | 0.369667  |
| 65 | 53 | 0 | -3.692362 | -2.710295 | -0.249331 |

***TS<sub>r</sub>-Ct(S-en)***

B3LYP-D3/6-31g(d) in gas phase

SCF Done: E(RB3LYP) = -2034.441067 hartree

Sum of electronic and thermal Free Energies = -2034.008058 hartree

The number of imaginary frequency = 1

Imaginary frequency = -352.54

| Center Number | Atomic Number | Atomic Type | Coordinates (Angstroms) |           |           |
|---------------|---------------|-------------|-------------------------|-----------|-----------|
|               |               |             | X                       | Y         | Z         |
| 1             | 6             | 0           | 0.728246                | -2.835546 | 2.428389  |
| 2             | 1             | 0           | -0.194907               | -2.772990 | 1.861249  |
| 3             | 1             | 0           | 0.656063                | -3.427879 | 3.336945  |
| 4             | 6             | 0           | 1.962451                | -2.796757 | 1.788899  |
| 5             | 1             | 0           | 2.815547                | -3.182559 | 2.340284  |
| 6             | 6             | 0           | 1.233889                | -1.561068 | -0.184623 |
| 7             | 1             | 0           | 0.219908                | -1.807328 | 0.120070  |
| 8             | 1             | 0           | 0.211692                | -0.746505 | -1.681719 |
| 9             | 7             | 0           | 1.184103                | -0.809528 | -1.311122 |
| 10            | 6             | 0           | 2.088390                | 0.045151  | -1.940122 |
| 11            | 8             | 0           | 3.143812                | 0.337279  | -1.163839 |

|    |    |   |           |           |           |
|----|----|---|-----------|-----------|-----------|
| 12 | 8  | 0 | 1.884660  | 0.501148  | -3.044049 |
| 13 | 1  | 0 | -0.028643 | 1.610940  | 0.198967  |
| 14 | 6  | 0 | 3.396290  | 4.692625  | -0.925681 |
| 15 | 6  | 0 | 3.836495  | 3.936109  | 0.146002  |
| 16 | 6  | 0 | 3.022241  | 2.914594  | 0.680432  |
| 17 | 6  | 0 | 1.741206  | 2.696918  | 0.108959  |
| 18 | 6  | 0 | 1.299177  | 3.458181  | -0.991679 |
| 19 | 6  | 0 | 2.128581  | 4.444230  | -1.496521 |
| 20 | 1  | 0 | 4.404404  | 2.183720  | 2.188857  |
| 21 | 1  | 0 | 4.027966  | 5.474616  | -1.336067 |
| 22 | 1  | 0 | 4.816501  | 4.110219  | 0.583013  |
| 23 | 6  | 0 | 3.417881  | 2.053615  | 1.751006  |
| 24 | 1  | 0 | 0.322373  | 3.248792  | -1.417251 |
| 25 | 1  | 0 | 1.798174  | 5.033766  | -2.346487 |
| 26 | 6  | 0 | 1.274973  | 0.911186  | 1.662444  |
| 27 | 6  | 0 | 2.585109  | 1.079344  | 2.218768  |
| 28 | 1  | 0 | 2.897528  | 0.426074  | 3.023725  |
| 29 | 7  | 0 | 0.931370  | 1.721510  | 0.632597  |
| 30 | 6  | 0 | 0.285889  | 0.007831  | 2.143106  |
| 31 | 1  | 0 | -0.677951 | 0.047532  | 1.648261  |
| 32 | 6  | 0 | 0.436623  | -0.883351 | 3.199870  |
| 33 | 1  | 0 | 1.306819  | -0.836273 | 3.847020  |
| 34 | 1  | 0 | -0.466197 | -1.229241 | 3.694426  |
| 35 | 6  | 0 | 4.180489  | 1.084975  | -1.821414 |
| 36 | 1  | 0 | 4.555984  | 0.529368  | -2.684867 |
| 37 | 1  | 0 | 3.801310  | 2.055998  | -2.144423 |
| 38 | 1  | 0 | 4.962625  | 1.205793  | -1.072822 |
| 39 | 6  | 0 | -5.119124 | 0.167753  | 0.802258  |
| 40 | 6  | 0 | -6.140748 | 0.722373  | 1.590069  |
| 41 | 6  | 0 | -5.870290 | 1.315111  | 2.822106  |
| 42 | 6  | 0 | -4.556100 | 1.370857  | 3.292127  |
| 43 | 6  | 0 | -3.522761 | 0.829135  | 2.528822  |
| 44 | 6  | 0 | -3.803210 | 0.229975  | 1.301055  |
| 45 | 6  | 0 | -5.421262 | -0.474716 | -0.497214 |
| 46 | 6  | 0 | -6.529157 | -1.324627 | -0.648585 |
| 47 | 6  | 0 | -6.823244 | -1.920526 | -1.873494 |
| 48 | 6  | 0 | -6.004011 | -1.680156 | -2.979960 |
| 49 | 6  | 0 | -4.897941 | -0.840739 | -2.856318 |
| 50 | 6  | 0 | -4.618616 | -0.243196 | -1.629347 |
| 51 | 1  | 0 | -7.158669 | 0.700666  | 1.210944  |
| 52 | 1  | 0 | -6.680265 | 1.742186  | 3.406637  |
| 53 | 1  | 0 | -4.333602 | 1.838632  | 4.247340  |
| 54 | 1  | 0 | -2.493655 | 0.859542  | 2.871780  |
| 55 | 1  | 0 | -7.150470 | -1.530973 | 0.218617  |
| 56 | 1  | 0 | -7.682568 | -2.579393 | -1.961501 |
| 57 | 1  | 0 | -6.222282 | -2.147523 | -3.936151 |
| 58 | 1  | 0 | -4.241921 | -0.629848 | -3.693979 |
| 59 | 8  | 0 | -2.771974 | -0.391596 | 0.618875  |
| 60 | 8  | 0 | -3.574011 | 0.664487  | -1.557675 |
| 61 | 15 | 0 | -2.179732 | 0.244226  | -0.803847 |
| 62 | 8  | 0 | -1.451807 | 1.535485  | -0.512716 |
| 63 | 8  | 0 | -1.479310 | -0.900288 | -1.483070 |
| 64 | 6  | 0 | 2.238901  | -2.165715 | 0.550753  |
| 65 | 53 | 0 | 4.285071  | -2.369776 | -0.105592 |

***TS<sub>r</sub>-Tc(R-ex)***



B3LYP-D3/6-31g(d) in gas phase  
 SCF Done: E(RB3LYP) = -2034.453793 hartree  
 Sum of electronic and thermal Free Energies = -2034.021128 hartree  
 The number of imaginary frequency = 1  
 Imaginary frequency = -366.73

| Center Number | Atomic Number | Atomic Type | Coordinates (Angstroms) |           |           |
|---------------|---------------|-------------|-------------------------|-----------|-----------|
|               |               |             | X                       | Y         | Z         |
| 1             | 6             | 0           | 5.381996                | -0.636051 | 0.999375  |
| 2             | 1             | 0           | 5.319774                | 0.347805  | 0.543516  |
| 3             | 1             | 0           | 6.322015                | -0.832144 | 1.509488  |
| 4             | 6             | 0           | 4.711349                | -1.719325 | 0.436406  |
| 5             | 1             | 0           | 5.030232                | -2.714385 | 0.734242  |
| 6             | 6             | 0           | 3.016495                | -0.408158 | -0.728486 |
| 7             | 1             | 0           | 3.683542                | 0.447694  | -0.708897 |
| 8             | 1             | 0           | 0.975676                | -0.757706 | -1.182965 |
| 9             | 7             | 0           | 1.814738                | -0.126180 | -1.283676 |
| 10            | 6             | 0           | 1.606506                | 1.155676  | -1.790755 |
| 11            | 8             | 0           | 0.332786                | 1.293208  | -2.189773 |
| 12            | 8             | 0           | 2.459094                | 2.023051  | -1.855609 |
| 13            | 1             | 0           | 0.519826                | 1.041771  | 1.356462  |
| 14            | 6             | 0           | -0.223648               | 5.466683  | -0.202672 |
| 15            | 6             | 0           | 1.122892                | 5.335327  | 0.085064  |
| 16            | 6             | 0           | 1.628556                | 4.117980  | 0.591582  |
| 17            | 6             | 0           | 0.731364                | 3.034684  | 0.785130  |
| 18            | 6             | 0           | -0.641871               | 3.170609  | 0.492840  |
| 19            | 6             | 0           | -1.102456               | 4.381188  | 0.008010  |
| 20            | 1             | 0           | 3.703873                | 4.721174  | 0.794150  |
| 21            | 1             | 0           | -0.608332               | 6.405398  | -0.589920 |
| 22            | 1             | 0           | 1.807996                | 6.164448  | -0.070998 |
| 23            | 6             | 0           | 2.998301                | 3.906494  | 0.935281  |
| 24            | 1             | 0           | -1.306196               | 2.325292  | 0.632769  |
| 25            | 1             | 0           | -2.158276               | 4.492079  | -0.221582 |
| 26            | 6             | 0           | 2.508401                | 1.619017  | 1.596860  |
| 27            | 6             | 0           | 3.424581                | 2.708761  | 1.432408  |
| 28            | 1             | 0           | 4.466520                | 2.558928  | 1.688416  |
| 29            | 7             | 0           | 1.216339                | 1.840558  | 1.257451  |
| 30            | 6             | 0           | 2.855365                | 0.323979  | 2.075071  |
| 31            | 1             | 0           | 2.056435                | -0.411545 | 2.068607  |
| 32            | 6             | 0           | 4.109127                | -0.031112 | 2.573788  |
| 33            | 1             | 0           | 4.808496                | 0.738146  | 2.891403  |
| 34            | 1             | 0           | 4.176216                | -0.947360 | 3.149836  |
| 35            | 6             | 0           | 0.018757                | 2.554545  | -2.806129 |
| 36            | 1             | 0           | 0.437509                | 2.587020  | -3.816739 |
| 37            | 1             | 0           | -1.069378               | 2.595103  | -2.839534 |
| 38            | 1             | 0           | 0.413266                | 3.384166  | -2.218781 |
| 39            | 6             | 0           | -4.536920               | -0.776110 | 0.888726  |
| 40            | 6             | 0           | -5.682298               | -0.446299 | 1.631072  |
| 41            | 6             | 0           | -5.767865               | -0.719780 | 2.995007  |
| 42            | 6             | 0           | -4.695110               | -1.330124 | 3.650362  |
| 43            | 6             | 0           | -3.546512               | -1.668596 | 2.936467  |
| 44            | 6             | 0           | -3.473168               | -1.401025 | 1.570577  |
| 45            | 6             | 0           | -4.453865               | -0.495764 | -0.562486 |
| 46            | 6             | 0           | -5.532794               | -0.745468 | -1.425383 |
| 47            | 6             | 0           | -5.436044               | -0.499196 | -2.794321 |

|    |    |   |           |           |           |
|----|----|---|-----------|-----------|-----------|
| 48 | 6  | 0 | -4.241834 | -0.012342 | -3.333411 |
| 49 | 6  | 0 | -3.157085 | 0.247330  | -2.496662 |
| 50 | 6  | 0 | -3.276212 | 0.028796  | -1.125879 |
| 51 | 1  | 0 | -6.505651 | 0.049843  | 1.124195  |
| 52 | 1  | 0 | -6.664047 | -0.448533 | 3.546107  |
| 53 | 1  | 0 | -4.750482 | -1.540678 | 4.714923  |
| 54 | 1  | 0 | -2.697646 | -2.148493 | 3.411724  |
| 55 | 1  | 0 | -6.446280 | -1.164198 | -1.012006 |
| 56 | 1  | 0 | -6.282929 | -0.708553 | -3.441874 |
| 57 | 1  | 0 | -4.151776 | 0.155361  | -4.403273 |
| 58 | 1  | 0 | -2.204661 | 0.596990  | -2.878459 |
| 59 | 8  | 0 | -2.363167 | -1.846576 | 0.874925  |
| 60 | 8  | 0 | -2.233818 | 0.397642  | -0.295542 |
| 61 | 15 | 0 | -1.237715 | -0.782609 | 0.321445  |
| 62 | 8  | 0 | -0.523349 | -0.116066 | 1.477201  |
| 63 | 8  | 0 | -0.475608 | -1.463408 | -0.776093 |
| 64 | 6  | 0 | 3.519099  | -1.625740 | -0.313890 |
| 65 | 53 | 0 | 2.447440  | -3.447506 | -0.677802 |

**TS<sub>r</sub>-Tc(S-ex)**

B3LYP-D3/6-31g(d) in gas phase  
 SCF Done: E(RB3LYP) = -2034.452220 hartree  
 Sum of electronic and thermal Free Energies = -2034.019568 hartree  
 The number of imaginary frequency = 1  
 Imaginary frequency = -363.22

| Center Number | Atomic Number | Atomic Type | Coordinates (Angstroms) |           |           |
|---------------|---------------|-------------|-------------------------|-----------|-----------|
|               |               |             | X                       | Y         | Z         |
| 1             | 6             | 0           | 4.390861                | -2.674721 | -1.592275 |
| 2             | 1             | 0           | 4.907535                | -1.915519 | -1.012741 |
| 3             | 1             | 0           | 5.037258                | -3.243258 | -2.256445 |
| 4             | 6             | 0           | 3.268919                | -3.318103 | -1.071953 |
| 5             | 1             | 0           | 2.967036                | -4.252626 | -1.536685 |
| 6             | 6             | 0           | 2.655019                | -1.552815 | 0.495558  |
| 7             | 1             | 0           | 3.676217                | -1.187621 | 0.453368  |
| 8             | 1             | 0           | 0.809426                | -0.862088 | 1.303930  |
| 9             | 7             | 0           | 1.862448                | -0.792759 | 1.280853  |
| 10            | 6             | 0           | 2.436426                | 0.293018  | 1.947123  |
| 11            | 8             | 0           | 1.496517                | 0.953795  | 2.631391  |
| 12            | 8             | 0           | 3.617533                | 0.588036  | 1.904965  |
| 13            | 1             | 0           | 0.968438                | 1.014878  | -1.011890 |
| 14            | 6             | 0           | 2.311037                | 5.067605  | 1.104079  |
| 15            | 6             | 0           | 3.433644                | 4.474541  | 0.553825  |
| 16            | 6             | 0           | 3.327662                | 3.248886  | -0.139189 |
| 17            | 6             | 0           | 2.050226                | 2.641298  | -0.258093 |
| 18            | 6             | 0           | 0.909860                | 3.239063  | 0.318674  |
| 19            | 6             | 0           | 1.050133                | 4.442915  | 0.985302  |
| 20            | 1             | 0           | 5.424366                | 3.015638  | -0.653731 |
| 21            | 1             | 0           | 2.398167                | 6.011258  | 1.634082  |
| 22            | 1             | 0           | 4.410331                | 4.942090  | 0.647234  |
| 23            | 6             | 0           | 4.435330                | 2.573096  | -0.739207 |
| 24            | 1             | 0           | -0.051612               | 2.741884  | 0.248550  |
| 25            | 1             | 0           | 0.175223                | 4.906616  | 1.431622  |
| 26            | 6             | 0           | 2.968204                | 0.798221  | -1.518816 |

|    |    |   |           |           |           |    |   |   |           |           |           |
|----|----|---|-----------|-----------|-----------|----|---|---|-----------|-----------|-----------|
| 27 | 6  | 0 | 4.267078  | 1.394909  | -1.406404 | 6  | 6 | 0 | 2.881909  | -0.542424 | -0.666363 |
| 28 | 1  | 0 | 5.114205  | 0.891125  | -1.856211 | 7  | 1 | 0 | 3.568475  | 0.291139  | -0.577982 |
| 29 | 7  | 0 | 1.935834  | 1.452053  | -0.931245 | 8  | 1 | 0 | 0.850470  | -0.863266 | -1.171807 |
| 30 | 6  | 0 | 2.669334  | -0.414355 | -2.197955 | 9  | 7 | 0 | 1.700173  | -0.236918 | -1.253584 |
| 31 | 1  | 0 | 1.625953  | -0.714617 | -2.178498 | 10 | 6 | 0 | 1.412530  | 1.002963  | -1.814156 |
| 32 | 6  | 0 | 3.587444  | -1.209871 | -2.884281 | 11 | 8 | 0 | 2.482258  | 1.833921  | -1.797344 |
| 33 | 1  | 0 | 4.567897  | -0.818025 | -3.143929 | 12 | 8 | 0 | 0.328465  | 1.297191  | -2.270121 |
| 34 | 1  | 0 | 3.192751  | -1.914834 | -3.607562 | 13 | 1 | 0 | 0.447346  | 0.978636  | 1.303289  |
| 35 | 6  | 0 | 1.978134  | 2.054648  | 3.419223  | 14 | 6 | 0 | 0.177218  | 5.510536  | -0.187239 |
| 36 | 1  | 0 | 2.533958  | 2.760787  | 2.799944  | 15 | 6 | 0 | 1.448517  | 5.294763  | 0.312629  |
| 37 | 1  | 0 | 1.083679  | 2.523961  | 3.827808  | 16 | 6 | 0 | 1.812510  | 4.023626  | 0.808326  |
| 38 | 1  | 0 | 2.623158  | 1.687909  | 4.223320  | 17 | 6 | 0 | 0.847724  | 2.979313  | 0.794458  |
| 39 | 6  | 0 | -4.380671 | 1.299598  | -0.632319 | 18 | 6 | 0 | -0.445030 | 3.200424  | 0.275709  |
| 40 | 6  | 0 | -5.354719 | 1.938538  | -1.416564 | 19 | 6 | 0 | -0.763375 | 4.457214  | -0.207234 |
| 41 | 6  | 0 | -5.098555 | 3.152583  | -2.051124 | 20 | 1 | 0 | 3.868218  | 4.492941  | 1.325632  |
| 42 | 6  | 0 | -3.845029 | 3.754230  | -1.917420 | 21 | 1 | 0 | -0.098886 | 6.488225  | -0.570604 |
| 43 | 6  | 0 | -2.859936 | 3.140142  | -1.145511 | 22 | 1 | 0 | 2.184592  | 6.094573  | 0.325790  |
| 44 | 6  | 0 | -3.126915 | 1.930149  | -0.505287 | 23 | 6 | 0 | 3.112538  | 3.711228  | 1.309717  |
| 45 | 6  | 0 | -4.670691 | 0.014892  | 0.044337  | 24 | 1 | 0 | -1.159000 | 2.384144  | 0.242234  |
| 46 | 6  | 0 | -5.894890 | -0.208246 | 0.695381  | 25 | 1 | 0 | -1.754750 | 4.629744  | -0.615388 |
| 47 | 6  | 0 | -6.173148 | -1.423637 | 1.318065  | 26 | 6 | 0 | 2.423338  | 1.420012  | 1.749625  |
| 48 | 6  | 0 | -5.221242 | -2.446994 | 1.306474  | 27 | 6 | 0 | 3.413527  | 2.457584  | 1.758613  |
| 49 | 6  | 0 | -3.998170 | -2.250290 | 0.667436  | 28 | 1 | 0 | 4.405242  | 2.231501  | 2.131113  |
| 50 | 6  | 0 | -3.734171 | -1.035080 | 0.039303  | 29 | 7 | 0 | 1.195102  | 1.739866  | 1.272671  |
| 51 | 1  | 0 | -6.319982 | 1.455441  | -1.540581 | 30 | 6 | 0 | 2.642961  | 0.084955  | 2.187917  |
| 52 | 1  | 0 | -5.869659 | 3.620163  | -2.656917 | 31 | 1 | 0 | 1.802313  | -0.593610 | 2.082490  |
| 53 | 1  | 0 | -3.631714 | 4.696421  | -2.414963 | 32 | 6 | 0 | 3.840792  | -0.379958 | 2.732493  |
| 54 | 1  | 0 | -1.879149 | 3.588092  | -1.023553 | 33 | 1 | 0 | 4.563551  | 0.317216  | 3.148892  |
| 55 | 1  | 0 | -6.623893 | 0.596918  | 0.726146  | 34 | 1 | 0 | 3.821224  | -1.339735 | 3.237045  |
| 56 | 1  | 0 | -7.125300 | -1.567674 | 1.821072  | 35 | 6 | 0 | 2.268016  | 3.095251  | -2.455387 |
| 57 | 1  | 0 | -5.427910 | -3.393888 | 1.797645  | 36 | 1 | 0 | 1.393453  | 3.602155  | -2.045553 |
| 58 | 1  | 0 | -3.235791 | -3.021410 | 0.637282  | 37 | 1 | 0 | 3.172021  | 3.674653  | -2.266337 |
| 59 | 8  | 0 | -2.164674 | 1.407839  | 0.339376  | 38 | 1 | 0 | 2.128742  | 2.939288  | -3.528959 |
| 60 | 8  | 0 | -2.554611 | -0.898020 | -0.671214 | 39 | 6 | 0 | -4.469588 | -0.237282 | -0.663751 |
| 61 | 15 | 0 | -1.339626 | 0.018193  | -0.050788 | 40 | 6 | 0 | -5.514301 | -0.363542 | -1.593796 |
| 62 | 8  | 0 | -0.407357 | 0.295471  | -1.209725 | 41 | 6 | 0 | -5.338552 | -0.002817 | -2.928887 |
| 63 | 8  | 0 | -0.812365 | -0.529398 | 1.242966  | 42 | 6 | 0 | -4.103303 | 0.485833  | -3.365643 |
| 64 | 6  | 0 | 2.375035  | -2.745987 | -0.141808 | 43 | 6 | 0 | -3.047918 | 0.621081  | -2.464267 |
| 65 | 53 | 0 | 0.494684  | -3.736995 | 0.152731  | 44 | 6 | 0 | -3.244717 | 0.271026  | -1.130723 |

**TS<sub>r</sub>-Tt(R-ex)**

B3LYP-D3/6-31g(d) in gas phase

SCF Done: E(RB3LYP) = -2034.449718 hartree

Sum of electronic and thermal Free Energies = -2034.016124 hartree

The number of imaginary frequency = 1

Imaginary frequency = -366.11

| Center Number | Atomic Number | Atomic Type | Coordinates (Angstroms) |           |          |
|---------------|---------------|-------------|-------------------------|-----------|----------|
|               |               |             | X                       | Y         | Z        |
| 1             | 6             | 0           | 5.160657                | -0.911283 | 1.176649 |
| 2             | 1             | 0           | 5.134885                | 0.100297  | 0.781475 |
| 3             | 1             | 0           | 6.076963                | -1.158037 | 1.707732 |
| 4             | 6             | 0           | 4.495336                | -1.945058 | 0.520793 |
| 5             | 1             | 0           | 4.782863                | -2.961587 | 0.774533 |

|    |    |   |           |           |           |
|----|----|---|-----------|-----------|-----------|
| 45 | 6  | 0 | -4.646638 | -0.599735 | 0.761601  |
| 46 | 6  | 0 | -5.818252 | -0.249498 | 1.452977  |
| 47 | 6  | 0 | -6.002276 | -0.583089 | 2.793462  |
| 48 | 6  | 0 | -5.002085 | -1.276043 | 3.480139  |
| 49 | 6  | 0 | -3.828972 | -1.635548 | 2.818751  |
| 50 | 6  | 0 | -3.656903 | -1.306865 | 1.474814  |
| 51 | 1  | 0 | -6.465020 | -0.771357 | -1.261274 |
| 52 | 1  | 0 | -6.159940 | -0.117715 | -3.630929 |
| 53 | 1  | 0 | -3.959149 | 0.753662  | -4.408955 |
| 54 | 1  | 0 | -2.068961 | 0.983058  | -2.759194 |
| 55 | 1  | 0 | -6.583811 | 0.312162  | 0.924542  |
| 56 | 1  | 0 | -6.917538 | -0.293662 | 3.302412  |
| 57 | 1  | 0 | -5.132733 | -1.535051 | 4.527334  |
| 58 | 1  | 0 | -3.035280 | -2.181217 | 3.318038  |
| 59 | 8  | 0 | -2.223011 | 0.498688  | -0.224018 |
| 60 | 8  | 0 | -2.529419 | -1.785624 | 0.833014  |
| 61 | 15 | 0 | -1.329614 | -0.787052 | 0.321167  |
| 62 | 8  | 0 | -0.625436 | -1.490008 | -0.802228 |

|    |    |   |           |           |           |
|----|----|---|-----------|-----------|-----------|
| 63 | 8  | 0 | -0.547692 | -0.219189 | 1.487901  |
| 64 | 6  | 0 | 3.341916  | -1.787076 | -0.277051 |
| 65 | 53 | 0 | 2.251796  | -3.566536 | -0.773384 |

-----

***TS<sub>r</sub>-Ti(S-ex)***

B3LYP-D3/6-31g(d) in gas phase

SCF Done: E(RB3LYP) = -2034.445986 hartree

Sum of electronic and thermal Free Energies = -2034.012585 hartree

The number of imaginary frequency = 1

Imaginary frequency = -364.93

| Center Number | Atomic Number | Atomic Type | Coordinates (Angstroms) |           |           |
|---------------|---------------|-------------|-------------------------|-----------|-----------|
|               |               |             | X                       | Y         | Z         |
| 1             | 6             | 0           | -1.768803               | -3.255357 | 2.513505  |
| 2             | 1             | 0           | -2.708264               | -2.751980 | 2.304268  |
| 3             | 1             | 0           | -1.782736               | -3.874813 | 3.406935  |
| 4             | 6             | 0           | -0.929164               | -3.642029 | 1.472861  |
| 5             | 1             | 0           | -0.179031               | -4.397028 | 1.691974  |
| 6             | 6             | 0           | -1.722766               | -2.005018 | -0.165845 |
| 7             | 1             | 0           | -2.655359               | -1.922589 | 0.380210  |
| 8             | 1             | 0           | -0.658791               | -0.900049 | -1.593904 |
| 9             | 7             | 0           | -1.607933               | -1.164491 | -1.223648 |
| 10            | 6             | 0           | -2.653676               | -0.389461 | -1.717344 |
| 11            | 8             | 0           | -3.828892               | -0.685534 | -1.106787 |
| 12            | 8             | 0           | -2.523243               | 0.431923  | -2.596221 |
| 13            | 1             | 0           | -1.153413               | 1.413810  | 0.448085  |
| 14            | 6             | 0           | -5.281870               | 3.601888  | -0.297156 |
| 15            | 6             | 0           | -5.466344               | 2.698025  | 0.732807  |
| 16            | 6             | 0           | -4.395535               | 1.885593  | 1.166552  |
| 17            | 6             | 0           | -3.131781               | 2.020794  | 0.531023  |
| 18            | 6             | 0           | -2.949153               | 2.936418  | -0.527545 |
| 19            | 6             | 0           | -4.021514               | 3.713826  | -0.926073 |
| 20            | 1             | 0           | -5.461079               | 0.788637  | 2.707679  |
| 21            | 1             | 0           | -6.107106               | 4.224576  | -0.629289 |
| 22            | 1             | 0           | -6.433365               | 2.597872  | 1.218999  |
| 23            | 6             | 0           | -4.504366               | 0.913865  | 2.206395  |
| 24            | 1             | 0           | -1.978504               | 2.995142  | -1.008111 |
| 25            | 1             | 0           | -3.891696               | 4.417070  | -1.743239 |
| 26            | 6             | 0           | -2.164574               | 0.303742  | 1.922099  |
| 27            | 6             | 0           | -3.433911               | 0.148180  | 2.571657  |
| 28            | 1             | 0           | -3.531175               | -0.587979 | 3.360170  |
| 29            | 7             | 0           | -2.083550               | 1.235589  | 0.943044  |
| 30            | 6             | 0           | -1.006816               | -0.469669 | 2.220392  |
| 31            | 1             | 0           | -0.119964               | -0.276353 | 1.626883  |
| 32            | 6             | 0           | -0.939802               | -1.431852 | 3.226207  |
| 33            | 1             | 0           | -1.645243               | -1.420918 | 4.052864  |
| 34            | 1             | 0           | 0.041926                | -1.808754 | 3.491359  |
| 35            | 6             | 0           | -4.973576               | -0.012989 | -1.659195 |
| 36            | 1             | 0           | -5.808684               | -0.291040 | -1.015666 |
| 37            | 1             | 0           | -4.828560               | 1.067932  | -1.655145 |
| 38            | 1             | 0           | -5.149159               | -0.351595 | -2.684345 |
| 39            | 6             | 0           | 4.220841                | 0.825728  | 0.503499  |
| 40            | 6             | 0           | 5.500279                | 0.271449  | 0.674384  |
| 41            | 6             | 0           | 5.674751                | -1.074827 | 0.989573  |

|    |    |   |           |           |           |
|----|----|---|-----------|-----------|-----------|
| 42 | 6  | 0 | 4.559767  | -1.903506 | 1.139424  |
| 43 | 6  | 0 | 3.279530  | -1.379361 | 0.971443  |
| 44 | 6  | 0 | 3.113930  | -0.032008 | 0.655478  |
| 45 | 6  | 0 | 4.046485  | 2.266786  | 0.209110  |
| 46 | 6  | 0 | 4.814899  | 3.238134  | 0.872423  |
| 47 | 6  | 0 | 4.664163  | 4.596048  | 0.598292  |
| 48 | 6  | 0 | 3.727227  | 5.014934  | -0.350252 |
| 49 | 6  | 0 | 2.950931  | 4.071795  | -1.021473 |
| 50 | 6  | 0 | 3.116419  | 2.715583  | -0.746976 |
| 51 | 1  | 0 | 6.366860  | 0.912488  | 0.538010  |
| 52 | 1  | 0 | 6.676993  | -1.477157 | 1.107710  |
| 53 | 1  | 0 | 4.684800  | -2.956166 | 1.378421  |
| 54 | 1  | 0 | 2.394527  | -1.996997 | 1.072676  |
| 55 | 1  | 0 | 5.524251  | 2.913474  | 1.628729  |
| 56 | 1  | 0 | 5.268168  | 5.325369  | 1.130940  |
| 57 | 1  | 0 | 3.598669  | 6.072234  | -0.565338 |
| 58 | 1  | 0 | 2.217403  | 4.358889  | -1.767285 |
| 59 | 8  | 0 | 1.830220  | 0.473570  | 0.594759  |
| 60 | 8  | 0 | 2.404778  | 1.801472  | -1.503581 |
| 61 | 15 | 0 | 1.151154  | 0.976874  | -0.842850 |
| 62 | 8  | 0 | 0.857057  | -0.187541 | -1.739408 |
| 63 | 8  | 0 | 0.054536  | 1.920419  | -0.397184 |
| 64 | 6  | 0 | -0.847687 | -3.006380 | 0.214526  |
| 65 | 53 | 0 | 0.729597  | -3.641157 | -1.097509 |

-----

**(R=TMS) (TMS=SiMe<sub>3</sub>)**

***TS<sub>TMS</sub>-Cc(R-en)***

B3LYP-D3/6-31g(d) in gas phase

SCF Done: E(RB3LYP) = -2432.396072 hartree

Sum of electronic and thermal Free Energies = -2431.854907 hartree

The number of imaginary frequency = 1

Imaginary frequency = -342.87

| Center Number | Atomic Number | Atomic Type | Coordinates (Angstroms) |           |           |
|---------------|---------------|-------------|-------------------------|-----------|-----------|
|               |               |             | X                       | Y         | Z         |
| 1             | 6             | 0           | 3.316257                | -3.593948 | -1.532616 |
| 2             | 1             | 0           | 2.277426                | -3.887453 | -1.420210 |
| 3             | 1             | 0           | 3.914485                | -4.279450 | -2.127498 |
| 4             | 6             | 0           | 3.954859                | -2.846512 | -0.553574 |
| 5             | 1             | 0           | 5.043086                | -2.874596 | -0.582529 |
| 6             | 6             | 0           | 3.373091                | -1.938504 | 0.387216  |
| 7             | 6             | 0           | 1.993450                | -1.803711 | 0.335329  |
| 8             | 1             | 0           | 1.396284                | -2.520940 | -0.219110 |
| 9             | 1             | 0           | 0.153876                | -1.155860 | 0.790628  |
| 10            | 7             | 0           | 1.150265                | -0.927419 | 0.959714  |
| 11            | 6             | 0           | 1.441580                | 0.349690  | 1.393788  |
| 12            | 8             | 0           | 0.321891                | 0.927363  | 1.863727  |
| 13            | 8             | 0           | 2.532097                | 0.890756  | 1.348526  |
| 14            | 1             | 0           | 0.132874                | 0.505723  | -1.834985 |
| 15            | 6             | 0           | 1.565215                | 4.811851  | -0.505330 |
| 16            | 6             | 0           | 2.689663                | 4.061640  | -0.801394 |
| 17            | 6             | 0           | 2.562990                | 2.728761  | -1.246307 |
| 18            | 6             | 0           | 1.263442                | 2.174960  | -1.367371 |
| 19            | 6             | 0           | 0.116901                | 2.942613  | -1.079130 |

|    |    |   |           |           |           |                                                            |        |        |                         |           |           |
|----|----|---|-----------|-----------|-----------|------------------------------------------------------------|--------|--------|-------------------------|-----------|-----------|
| 20 | 6  | 0 | 0.278842  | 4.249401  | -0.654697 | 77                                                         | 1      | 0      | 1.131429                | 2.185606  | 3.314507  |
| 21 | 1  | 0 | 4.674754  | 2.290336  | -1.503594 | -----                                                      |        |        |                         |           |           |
| 22 | 1  | 0 | 1.669839  | 5.837491  | -0.164317 |                                                            |        |        |                         |           |           |
| 23 | 1  | 0 | 3.683940  | 4.487792  | -0.696387 | <i>TS<sub>TMS</sub>-Cc(S-en)</i>                           |        |        |                         |           |           |
| 24 | 6  | 0 | 3.668165  | 1.891560  | -1.593888 | B3LYP-D3/6-31g(d) in gas phase                             |        |        |                         |           |           |
| 25 | 1  | 0 | -0.861635 | 2.489294  | -1.200084 | SCF Done: E(RB3LYP) = -2432.396885 hartree                 |        |        |                         |           |           |
| 26 | 1  | 0 | -0.599779 | 4.848680  | -0.432333 | Sum of electronic and thermal Free Energies = -2431.855695 |        |        |                         |           |           |
| 27 | 6  | 0 | 2.157127  | 0.057540  | -2.103205 | hartree                                                    |        |        |                         |           |           |
| 28 | 6  | 0 | 3.477081  | 0.608896  | -2.014148 | The number of imaginary frequency = 1                      |        |        |                         |           |           |
| 29 | 1  | 0 | 4.322302  | -0.024304 | -2.251541 | Imaginary frequency = -321.11                              |        |        |                         |           |           |
| 30 | 7  | 0 | 1.126290  | 0.870430  | -1.772536 | -----                                                      |        |        |                         |           |           |
| 31 | 6  | 0 | 1.841085  | -1.259055 | -2.543087 | Center                                                     | Atomic | Atomic | Coordinates (Angstroms) |           |           |
| 32 | 1  | 0 | 0.790901  | -1.535742 | -2.496100 | Number                                                     | Number | Type   | X                       | Y         | Z         |
| 33 | 6  | 0 | 2.757331  | -2.169029 | -3.051269 | -----                                                      |        |        |                         |           |           |
| 34 | 1  | 0 | 3.763416  | -1.855479 | -3.308847 | 1                                                          | 6      | 0      | 0.499520                | -3.567180 | 1.172435  |
| 35 | 1  | 0 | 2.378914  | -2.988225 | -3.654157 | 2                                                          | 1      | 0      | -0.399374               | -3.129715 | 0.749529  |
| 36 | 6  | 0 | -4.793972 | 0.519099  | 0.409756  | 3                                                          | 1      | 0      | 0.327543                | -4.448914 | 1.784617  |
| 37 | 6  | 0 | -5.806935 | 1.491397  | 0.438573  | 4                                                          | 6      | 0      | 1.734218                | -3.427252 | 0.558446  |
| 38 | 6  | 0 | -5.512716 | 2.846004  | 0.583028  | 5                                                          | 1      | 0      | 2.500850                | -4.121074 | 0.898814  |
| 39 | 6  | 0 | -4.184142 | 3.260100  | 0.705950  | 6                                                          | 6      | 0      | 2.167125                | -2.402614 | -0.342896 |
| 40 | 6  | 0 | -3.159433 | 2.315931  | 0.675551  | 7                                                          | 6      | 0      | 1.205843                | -1.486203 | -0.743776 |
| 41 | 6  | 0 | -3.462787 | 0.963364  | 0.522044  | 8                                                          | 1      | 0      | 0.153825                | -1.694061 | -0.566419 |
| 42 | 6  | 0 | -5.114776 | -0.924319 | 0.315912  | 9                                                          | 1      | 0      | 0.385790                | 0.062970  | -1.738210 |
| 43 | 6  | 0 | -6.174595 | -1.472074 | 1.057622  | 10                                                         | 7      | 0      | 1.310468                | -0.324043 | -1.453477 |
| 44 | 6  | 0 | -6.490291 | -2.826956 | 0.985745  | 11                                                         | 6      | 0      | 2.409619                | 0.500704  | -1.550657 |
| 45 | 6  | 0 | -5.738473 | -3.673172 | 0.167144  | 12                                                         | 8      | 0      | 2.100557                | 1.572513  | -2.304741 |
| 46 | 6  | 0 | -4.680735 | -3.156403 | -0.578248 | 13                                                         | 8      | 0      | 3.493377                | 0.318207  | -1.024956 |
| 47 | 6  | 0 | -4.378014 | -1.798011 | -0.506614 | 14                                                         | 1      | 0      | 0.228774                | 1.451984  | 0.953458  |
| 48 | 1  | 0 | -6.839356 | 1.170815  | 0.329843  | 15                                                         | 6      | 0      | 3.932824                | 4.407118  | 0.751790  |
| 49 | 1  | 0 | -6.317446 | 3.575675  | 0.594930  | 16                                                         | 6      | 0      | 4.350457                | 3.234049  | 1.356277  |
| 50 | 1  | 0 | -3.946511 | 4.314162  | 0.823747  | 17                                                         | 6      | 0      | 3.445543                | 2.170138  | 1.553068  |
| 51 | 1  | 0 | -2.117231 | 2.598072  | 0.779000  | 18                                                         | 6      | 0      | 2.107316                | 2.329150  | 1.111504  |
| 52 | 1  | 0 | -6.740512 | -0.818966 | 1.716212  | 19                                                         | 6      | 0      | 1.683210                | 3.519873  | 0.489124  |
| 53 | 1  | 0 | -7.311873 | -3.222785 | 1.576155  | 20                                                         | 6      | 0      | 2.595512                | 4.546550  | 0.321751  |
| 54 | 1  | 0 | -5.972314 | -4.732724 | 0.110148  | 21                                                         | 1      | 0      | 4.811778                | 0.779794  | 2.512504  |
| 55 | 1  | 0 | -4.079882 | -3.782239 | -1.229525 | 22                                                         | 1      | 0      | 4.633785                | 5.223644  | 0.606605  |
| 56 | 8  | 0 | -2.432951 | 0.049091  | 0.579602  | 23                                                         | 1      | 0      | 5.378947                | 3.116851  | 1.687521  |
| 57 | 8  | 0 | -3.397370 | -1.306099 | -1.348448 | 24                                                         | 6      | 0      | 3.788891                | 0.930171  | 2.177952  |
| 58 | 15 | 0 | -1.952369 | -0.773334 | -0.775646 | 25                                                         | 1      | 0      | 0.652326                | 3.599896  | 0.156968  |
| 59 | 8  | 0 | -1.432275 | 0.182942  | -1.824845 | 26                                                         | 1      | 0      | 2.277776                | 5.470545  | -0.152725 |
| 60 | 8  | 0 | -1.074916 | -1.884107 | -0.267143 | 27                                                         | 6      | 0      | 1.514618                | 0.124216  | 1.897217  |
| 61 | 14 | 0 | 4.581462  | -1.203644 | 1.673841  | 28                                                         | 6      | 0      | 2.863267                | -0.056112 | 2.346291  |
| 62 | 6  | 0 | 5.547082  | 0.295913  | 1.044933  | 29                                                         | 1      | 0      | 3.135591                | -0.995987 | 2.809574  |
| 63 | 1  | 0 | 4.893843  | 1.160540  | 0.918765  | 30                                                         | 7      | 0      | 1.217477                | 1.301628  | 1.294192  |
| 64 | 1  | 0 | 6.342466  | 0.552537  | 1.756181  | 31                                                         | 6      | 0      | 0.444526                | -0.793126 | 2.080631  |
| 65 | 1  | 0 | 6.027507  | 0.074463  | 0.083431  | 32                                                         | 1      | 0      | -0.519246               | -0.468014 | 1.706521  |
| 66 | 6  | 0 | 3.736237  | -0.909111 | 3.344339  | 33                                                         | 6      | 0      | 0.520041                | -2.029657 | 2.700908  |
| 67 | 1  | 0 | 4.360281  | -1.294664 | 4.158883  | 34                                                         | 1      | 0      | 1.417347                | -2.341579 | 3.225477  |
| 68 | 1  | 0 | 3.554709  | 0.154649  | 3.516870  | 35                                                         | 1      | 0      | -0.398158               | -2.463822 | 3.083655  |
| 69 | 1  | 0 | 2.770036  | -1.424399 | 3.395772  | 36                                                         | 14     | 0      | 3.958222                | -2.587900 | -0.986450 |
| 70 | 6  | 0 | 5.872368  | -2.571562 | 1.972565  | 37                                                         | 6      | 0      | 3.190265                | 2.478116  | -2.544046 |
| 71 | 1  | 0 | 5.401676  | -3.526420 | 2.234958  | 38                                                         | 1      | 0      | 3.954480                | 1.991911  | -3.158165 |
| 72 | 1  | 0 | 6.531272  | -2.748293 | 1.114354  | 39                                                         | 1      | 0      | 2.750291                | 3.319969  | -3.078863 |
| 73 | 1  | 0 | 6.513095  | -2.276364 | 2.813332  | 40                                                         | 1      | 0      | 3.635135                | 2.810345  | -1.604937 |
| 74 | 6  | 0 | 0.498994  | 2.238326  | 2.423147  | 41                                                         | 6      | 0      | 5.256104                | -1.897805 | 0.203784  |
| 75 | 1  | 0 | 0.951329  | 2.914556  | 1.695578  | 42                                                         | 1      | 0      | 5.129002                | -2.327297 | 1.205758  |
| 76 | 1  | 0 | -0.505180 | 2.570820  | 2.686664  | 43                                                         | 1      | 0      | 6.262730                | -2.166388 | -0.141145 |

|    |    |   |           |           |           |    |    |   |           |           |           |
|----|----|---|-----------|-----------|-----------|----|----|---|-----------|-----------|-----------|
| 44 | 1  | 0 | 5.186550  | -0.811508 | 0.277571  | 11 | 6  | 0 | -1.419444 | 0.758941  | -1.409575 |
| 45 | 6  | 0 | 4.145538  | -1.955691 | -2.763850 | 12 | 8  | 0 | -2.737304 | 0.646531  | -1.156054 |
| 46 | 1  | 0 | 4.683112  | -1.004651 | -2.794157 | 13 | 8  | 0 | -0.902678 | 1.744272  | -1.900828 |
| 47 | 1  | 0 | 4.692512  | -2.686641 | -3.370516 | 14 | 1  | 0 | -0.309988 | 0.867432  | 1.815335  |
| 48 | 1  | 0 | 3.167968  | -1.801083 | -3.235278 | 15 | 6  | 0 | -3.090302 | 4.616324  | 0.975681  |
| 49 | 6  | 0 | 4.267779  | -4.465435 | -1.069657 | 16 | 6  | 0 | -3.900434 | 3.552345  | 1.333524  |
| 50 | 1  | 0 | 4.338624  | -4.944364 | -0.086102 | 17 | 6  | 0 | -3.338072 | 2.289674  | 1.612941  |
| 51 | 1  | 0 | 3.487178  | -4.983510 | -1.639238 | 18 | 6  | 0 | -1.928084 | 2.141753  | 1.543798  |
| 52 | 1  | 0 | 5.222555  | -4.642085 | -1.581317 | 19 | 6  | 0 | -1.104926 | 3.222244  | 1.168298  |
| 53 | 6  | 0 | -4.919957 | -0.264548 | 0.791227  | 20 | 6  | 0 | -1.692602 | 4.443196  | 0.887403  |
| 54 | 6  | 0 | -5.962774 | -0.270952 | 1.731550  | 21 | 1  | 0 | -5.188524 | 1.207849  | 1.977038  |
| 55 | 6  | 0 | -5.716898 | -0.432356 | 3.093270  | 22 | 1  | 0 | -3.528959 | 5.585122  | 0.756458  |
| 56 | 6  | 0 | -4.405049 | -0.584138 | 3.546542  | 23 | 1  | 0 | -4.979527 | 3.671739  | 1.391721  |
| 57 | 6  | 0 | -3.351114 | -0.579462 | 2.634575  | 24 | 6  | 0 | -4.105226 | 1.124167  | 1.933592  |
| 58 | 6  | 0 | -3.605130 | -0.425879 | 1.271537  | 25 | 1  | 0 | -0.031905 | 3.067565  | 1.104198  |
| 59 | 6  | 0 | -5.203681 | -0.107010 | -0.653387 | 26 | 1  | 0 | -1.065826 | 5.279582  | 0.592607  |
| 60 | 6  | 0 | -6.276581 | -0.777979 | -1.262432 | 27 | 6  | 0 | -2.070261 | -0.192076 | 2.157258  |
| 61 | 6  | 0 | -6.556697 | -0.616243 | -2.617521 | 28 | 6  | 0 | -3.501414 | -0.073200 | 2.177028  |
| 62 | 6  | 0 | -5.758423 | 0.223324  | -3.398745 | 29 | 1  | 0 | -4.091065 | -0.949352 | 2.416488  |
| 63 | 6  | 0 | -4.686820 | 0.899771  | -2.818891 | 30 | 7  | 0 | -1.366752 | 0.923506  | 1.832637  |
| 64 | 6  | 0 | -4.421364 | 0.737162  | -1.461398 | 31 | 6  | 0 | -1.336338 | -1.344331 | 2.533824  |
| 65 | 1  | 0 | -6.980053 | -0.125948 | 1.378687  | 32 | 1  | 0 | -0.256466 | -1.243746 | 2.561447  |
| 66 | 1  | 0 | -6.543975 | -0.426525 | 3.797559  | 33 | 6  | 0 | -1.867824 | -2.593346 | 2.834041  |
| 67 | 1  | 0 | -4.199868 | -0.701188 | 4.607212  | 34 | 1  | 0 | -2.940724 | -2.745023 | 2.910082  |
| 68 | 1  | 0 | -2.324441 | -0.691500 | 2.966120  | 35 | 1  | 0 | -1.281260 | -3.248743 | 3.470232  |
| 69 | 1  | 0 | -6.881277 | -1.450223 | -0.659875 | 36 | 14 | 0 | -3.574900 | -2.131410 | -1.912743 |
| 70 | 1  | 0 | -7.388670 | -1.152697 | -3.065151 | 37 | 6  | 0 | -3.525377 | 1.753681  | -1.637913 |
| 71 | 1  | 0 | -5.966014 | 0.348206  | -4.457901 | 38 | 1  | 0 | -3.127003 | 2.696281  | -1.263233 |
| 72 | 1  | 0 | -4.046129 | 1.559398  | -3.394121 | 39 | 1  | 0 | -3.528393 | 1.762450  | -2.731434 |
| 73 | 8  | 0 | -2.546770 | -0.538871 | 0.387912  | 40 | 1  | 0 | -4.529285 | 1.578454  | -1.255990 |
| 74 | 8  | 0 | -3.411055 | 1.492366  | -0.887668 | 41 | 6  | 0 | -5.110019 | -1.278207 | -1.191550 |
| 75 | 15 | 0 | -1.992344 | 0.767615  | -0.492287 | 42 | 1  | 0 | -5.676897 | -0.747281 | -1.965981 |
| 76 | 8  | 0 | -1.270573 | 1.723196  | 0.427462  | 43 | 1  | 0 | -5.780418 | -2.024232 | -0.748184 |
| 77 | 8  | 0 | -1.307937 | 0.176631  | -1.691782 | 44 | 1  | 0 | -4.836198 | -0.563266 | -0.411930 |

-----

**TS<sub>TMS</sub>-Ct(R-en)**

B3LYP-D3/6-31g(d) in gas phase

SCF Done: E(RB3LYP) = -2432.391406 hartree

Sum of electronic and thermal Free Energies = -2431.848683 hartree

The number of imaginary frequency = 1

Imaginary frequency = -336.93

-----

| Center Number | Atomic Number | Atomic Type | Coordinates (Angstroms) |   |   |
|---------------|---------------|-------------|-------------------------|---|---|
|               |               |             | X                       | Y | Z |

|    |   |   |           |           |           |
|----|---|---|-----------|-----------|-----------|
| 1  | 6 | 0 | -1.412359 | -3.886093 | 1.218612  |
| 2  | 1 | 0 | -0.375030 | -3.563657 | 1.234168  |
| 3  | 1 | 0 | -1.595240 | -4.850467 | 1.686835  |
| 4  | 6 | 0 | -2.278748 | -3.490300 | 0.206721  |
| 5  | 1 | 0 | -3.188745 | -4.080312 | 0.113385  |
| 6  | 6 | 0 | -2.188368 | -2.325662 | -0.621413 |
| 7  | 6 | 0 | -1.039606 | -1.564261 | -0.479973 |
| 8  | 1 | 0 | -0.188307 | -1.961974 | 0.067537  |
| 9  | 1 | 0 | 0.316755  | -0.148332 | -1.004810 |
| 10 | 7 | 0 | -0.688340 | -0.347230 | -1.016358 |

|    |   |   |           |           |           |
|----|---|---|-----------|-----------|-----------|
| 45 | 6 | 0 | -2.939118 | -1.366848 | -3.523834 |
| 46 | 1 | 0 | -2.037446 | -1.898332 | -3.851465 |
| 47 | 1 | 0 | -3.696394 | -1.503473 | -4.306131 |
| 48 | 1 | 0 | -2.697676 | -0.303341 | -3.480514 |
| 49 | 6 | 0 | -4.105809 | -3.887993 | -2.405975 |
| 50 | 1 | 0 | -3.253848 | -4.493740 | -2.735574 |
| 51 | 1 | 0 | -4.612362 | -4.431061 | -1.599941 |
| 52 | 1 | 0 | -4.811718 | -3.825607 | -3.244039 |
| 53 | 6 | 0 | 5.050701  | -0.315178 | -0.317137 |
| 54 | 6 | 0 | 6.127560  | -0.992791 | -0.910952 |
| 55 | 6 | 0 | 6.736564  | -2.076942 | -0.282117 |
| 56 | 6 | 0 | 6.272634  | -2.511790 | 0.962047  |
| 57 | 6 | 0 | 5.205027  | -1.856241 | 1.572975  |
| 58 | 6 | 0 | 4.609893  | -0.768530 | 0.938817  |
| 59 | 6 | 0 | 4.415641  | 0.848373  | -0.976928 |
| 60 | 6 | 0 | 5.195901  | 1.840180  | -1.592632 |
| 61 | 6 | 0 | 4.612206  | 2.933407  | -2.229258 |
| 62 | 6 | 0 | 3.221628  | 3.057686  | -2.258193 |
| 63 | 6 | 0 | 2.420582  | 2.090145  | -1.652614 |
| 64 | 6 | 0 | 3.016521  | 0.999031  | -1.023618 |
| 65 | 1 | 0 | 6.471332  | -0.668892 | -1.889503 |
| 66 | 1 | 0 | 7.563860  | -2.587925 | -0.766799 |
| 67 | 1 | 0 | 6.737917  | -3.361076 | 1.454855  |

|    |    |   |          |           |           |
|----|----|---|----------|-----------|-----------|
| 68 | 1  | 0 | 4.819812 | -2.164073 | 2.539142  |
| 69 | 1  | 0 | 6.277912 | 1.751663  | -1.547935 |
| 70 | 1  | 0 | 5.241107 | 3.688660  | -2.692538 |
| 71 | 1  | 0 | 2.755966 | 3.906718  | -2.751394 |
| 72 | 1  | 0 | 1.338277 | 2.155252  | -1.678715 |
| 73 | 8  | 0 | 3.616618 | -0.070858 | 1.606961  |
| 74 | 8  | 0 | 2.195898 | -0.000828 | -0.515357 |
| 75 | 15 | 0 | 2.051936 | -0.245513 | 1.143924  |
| 76 | 8  | 0 | 1.546948 | -1.648026 | 1.286441  |
| 77 | 8  | 0 | 1.300307 | 0.922597  | 1.739202  |

-----

***TS<sub>TMS</sub>-Ct(S-en)***

B3LYP-D3/6-31g(d) in gas phase

SCF Done: E(RB3LYP) = -2432.390310 hartree

Sum of electronic and thermal Free Energies = -2431.848980 hartree

The number of imaginary frequency = 1

Imaginary frequency = -316.79

| Center Number | Atomic Number | Atomic Type | Coordinates (Angstroms) |           |           |
|---------------|---------------|-------------|-------------------------|-----------|-----------|
|               |               |             | X                       | Y         | Z         |
| 1             | 6             | 0           | 0.849192                | -2.942084 | 2.448410  |
| 2             | 1             | 0           | -0.082160               | -2.851566 | 1.898860  |
| 3             | 1             | 0           | 0.775286                | -3.509444 | 3.372545  |
| 4             | 6             | 0           | 2.074919                | -2.894745 | 1.804240  |
| 5             | 1             | 0           | 2.914009                | -3.285529 | 2.377400  |
| 6             | 6             | 0           | 2.400817                | -2.281776 | 0.551223  |
| 7             | 6             | 0           | 1.346913                | -1.707076 | -0.147694 |
| 8             | 1             | 0           | 0.327839                | -1.938023 | 0.151418  |
| 9             | 1             | 0           | 0.315974                | -0.847150 | -1.631318 |
| 10            | 7             | 0           | 1.288937                | -0.935748 | -1.270475 |
| 11            | 6             | 0           | 2.184729                | -0.081875 | -1.890359 |
| 12            | 8             | 0           | 3.338213                | 0.075254  | -1.201198 |
| 13            | 8             | 0           | 1.927723                | 0.491849  | -2.927532 |
| 14            | 1             | 0           | 0.142099                | 1.503509  | 0.165577  |
| 15            | 6             | 0           | 3.605116                | 4.524875  | -1.000171 |
| 16            | 6             | 0           | 4.025738                | 3.796208  | 0.098368  |
| 17            | 6             | 0           | 3.197105                | 2.796430  | 0.650056  |
| 18            | 6             | 0           | 1.924340                | 2.567931  | 0.064891  |
| 19            | 6             | 0           | 1.502379                | 3.300683  | -1.062253 |
| 20            | 6             | 0           | 2.344040                | 4.268903  | -1.580769 |
| 21            | 1             | 0           | 4.542788                | 2.116091  | 2.214524  |
| 22            | 1             | 0           | 4.247338                | 5.291591  | -1.422948 |
| 23            | 1             | 0           | 4.999787                | 3.977968  | 0.545546  |
| 24            | 6             | 0           | 3.565946                | 1.972744  | 1.759257  |
| 25            | 1             | 0           | 0.532087                | 3.082596  | -1.497556 |
| 26            | 1             | 0           | 2.028764                | 4.836583  | -2.451093 |
| 27            | 6             | 0           | 1.421497                | 0.831383  | 1.664015  |
| 28            | 6             | 0           | 2.720435                | 1.017225  | 2.241592  |
| 29            | 1             | 0           | 3.013308                | 0.392896  | 3.076276  |
| 30            | 7             | 0           | 1.101741                | 1.610648  | 0.603149  |
| 31            | 6             | 0           | 0.419899                | -0.050144 | 2.158142  |
| 32            | 1             | 0           | -0.539261               | -0.013392 | 1.653872  |
| 33            | 6             | 0           | 0.560008                | -0.922111 | 3.225051  |
| 34            | 1             | 0           | 1.435236                | -0.894401 | 3.865614  |

|    |    |   |           |           |           |
|----|----|---|-----------|-----------|-----------|
| 35 | 1  | 0 | -0.341107 | -1.284700 | 3.708561  |
| 36 | 14 | 0 | 4.189897  | -2.550255 | -0.045530 |
| 37 | 6  | 0 | 4.313953  | 0.891951  | -1.877531 |
| 38 | 1  | 0 | 4.639524  | 0.402893  | -2.799840 |
| 39 | 1  | 0 | 3.894563  | 1.870301  | -2.112196 |
| 40 | 1  | 0 | 5.145266  | 0.984930  | -1.181056 |
| 41 | 6  | 0 | 5.395617  | -1.252213 | 0.634549  |
| 42 | 1  | 0 | 5.747438  | -1.552325 | 1.629076  |
| 43 | 1  | 0 | 6.278448  | -1.152052 | -0.008715 |
| 44 | 1  | 0 | 4.918966  | -0.274264 | 0.725198  |
| 45 | 6  | 0 | 4.275576  | -2.793607 | -1.920209 |
| 46 | 1  | 0 | 5.279783  | -3.143910 | -2.190738 |
| 47 | 1  | 0 | 3.568729  | -3.576904 | -2.219679 |
| 48 | 1  | 0 | 4.060048  | -1.907115 | -2.518760 |
| 49 | 6  | 0 | 4.748895  | -4.221811 | 0.667490  |
| 50 | 1  | 0 | 4.878521  | -4.209198 | 1.755847  |
| 51 | 1  | 0 | 4.046171  | -5.026346 | 0.421964  |
| 52 | 1  | 0 | 5.720880  | -4.486999 | 0.232108  |
| 53 | 6  | 0 | -4.986266 | 0.228280  | 0.818357  |
| 54 | 6  | 0 | -5.986268 | 0.820983  | 1.605720  |
| 55 | 6  | 0 | -5.691712 | 1.417064  | 2.830205  |
| 56 | 6  | 0 | -4.374180 | 1.437814  | 3.292739  |
| 57 | 6  | 0 | -3.361823 | 0.858000  | 2.529973  |
| 58 | 6  | 0 | -3.666471 | 0.256453  | 1.309440  |
| 59 | 6  | 0 | -5.315030 | -0.417471 | -0.472996 |
| 60 | 6  | 0 | -6.449714 | -1.233334 | -0.610200 |
| 61 | 6  | 0 | -6.769326 | -1.831691 | -1.827126 |
| 62 | 6  | 0 | -5.949134 | -1.628596 | -2.939921 |
| 63 | 6  | 0 | -4.816695 | -0.823638 | -2.830591 |
| 64 | 6  | 0 | -4.511498 | -0.223496 | -1.611334 |
| 65 | 1  | 0 | -7.006485 | 0.826198  | 1.232096  |
| 66 | 1  | 0 | -6.485404 | 1.873985  | 3.414578  |
| 67 | 1  | 0 | -4.132635 | 1.907615  | 4.242374  |
| 68 | 1  | 0 | -2.330405 | 0.860532  | 2.867132  |
| 69 | 1  | 0 | -7.072539 | -1.411353 | 0.262221  |
| 70 | 1  | 0 | -7.649500 | -2.463972 | -1.903843 |
| 71 | 1  | 0 | -6.187457 | -2.098257 | -3.890249 |
| 72 | 1  | 0 | -4.158525 | -0.642040 | -3.673442 |
| 73 | 8  | 0 | -2.658220 | -0.402930 | 0.629090  |
| 74 | 8  | 0 | -3.438934 | 0.651510  | -1.555112 |
| 75 | 15 | 0 | -2.052644 | 0.198625  | -0.803057 |
| 76 | 8  | 0 | -1.289676 | 1.472948  | -0.527862 |
| 77 | 8  | 0 | -1.387233 | -0.969431 | -1.473912 |

-----

***TS<sub>TMS</sub>-Tc(R-ex)***

B3LYP-D3/6-31g(d) in gas phase

SCF Done: E(RB3LYP) = -2432.406690 hartree

Sum of electronic and thermal Free Energies = -2431.865032 hartree

The number of imaginary frequency = 1

Imaginary frequency = -333.25

| Center Number | Atomic Number | Atomic Type | Coordinates (Angstroms) |          |           |
|---------------|---------------|-------------|-------------------------|----------|-----------|
|               |               |             | X                       | Y        | Z         |
| 1             | 6             | 0           | 5.395555                | 1.065561 | -1.002188 |

|    |    |   |           |           |           |
|----|----|---|-----------|-----------|-----------|
| 2  | 1  | 0 | 5.387257  | 0.085530  | -0.533971 |
| 3  | 1  | 0 | 6.318834  | 1.308789  | -1.522307 |
| 4  | 6  | 0 | 4.623871  | 2.103197  | -0.497920 |
| 5  | 1  | 0 | 4.895475  | 3.100174  | -0.841582 |
| 6  | 6  | 0 | 3.415794  | 1.997028  | 0.254145  |
| 7  | 6  | 0 | 3.063288  | 0.735451  | 0.703542  |
| 8  | 1  | 0 | 3.790412  | -0.071389 | 0.725071  |
| 9  | 1  | 0 | 1.000364  | 0.896677  | 1.049207  |
| 10 | 7  | 0 | 1.872201  | 0.360192  | 1.246515  |
| 11 | 6  | 0 | 1.745783  | -0.894928 | 1.824869  |
| 12 | 8  | 0 | 0.467329  | -1.099907 | 2.195762  |
| 13 | 8  | 0 | 2.651498  | -1.694447 | 1.973243  |
| 14 | 1  | 0 | 0.664451  | -1.039979 | -1.410157 |
| 15 | 6  | 0 | 0.269891  | -5.385240 | 0.445055  |
| 16 | 6  | 0 | 1.606126  | -5.155669 | 0.171107  |
| 17 | 6  | 0 | 2.016795  | -3.933765 | -0.403835 |
| 18 | 6  | 0 | 1.035045  | -2.947199 | -0.680233 |
| 19 | 6  | 0 | -0.326867 | -3.181191 | -0.399419 |
| 20 | 6  | 0 | -0.693033 | -4.394870 | 0.153368  |
| 21 | 1  | 0 | 4.140290  | -4.365327 | -0.534058 |
| 22 | 1  | 0 | -0.041313 | -6.328054 | 0.884853  |
| 23 | 1  | 0 | 2.356041  | -5.910987 | 0.390982  |
| 24 | 6  | 0 | 3.370730  | -3.625873 | -0.739985 |
| 25 | 1  | 0 | -1.055799 | -2.404873 | -0.604022 |
| 26 | 1  | 0 | -1.740007 | -4.582017 | 0.373946  |
| 27 | 6  | 0 | 2.702730  | -1.435557 | -1.557047 |
| 28 | 6  | 0 | 3.703977  | -2.430130 | -1.306129 |
| 29 | 1  | 0 | 4.734963  | -2.205709 | -1.551377 |
| 30 | 7  | 0 | 1.427722  | -1.749373 | -1.224412 |
| 31 | 6  | 0 | 2.946422  | -0.149674 | -2.113137 |
| 32 | 1  | 0 | 2.092597  | 0.520316  | -2.148322 |
| 33 | 6  | 0 | 4.170074  | 0.281738  | -2.610682 |
| 34 | 1  | 0 | 4.948693  | -0.432255 | -2.863632 |
| 35 | 1  | 0 | 4.184225  | 1.184810  | -3.209809 |
| 36 | 14 | 0 | 2.450671  | 3.616317  | 0.581235  |
| 37 | 6  | 0 | 1.389136  | 4.072885  | -0.908381 |
| 38 | 1  | 0 | 1.976922  | 4.072905  | -1.834780 |
| 39 | 1  | 0 | 0.565784  | 3.360550  | -1.007043 |
| 40 | 1  | 0 | 0.960555  | 5.075378  | -0.784525 |
| 41 | 6  | 0 | 1.438868  | 3.499660  | 2.169701  |
| 42 | 1  | 0 | 0.510293  | 2.945408  | 2.014140  |
| 43 | 1  | 0 | 2.008680  | 3.022420  | 2.975886  |
| 44 | 1  | 0 | 1.175479  | 4.511111  | 2.503823  |
| 45 | 6  | 0 | 3.767690  | 4.962943  | 0.832183  |
| 46 | 1  | 0 | 4.332848  | 5.189201  | -0.079574 |
| 47 | 1  | 0 | 3.274309  | 5.892247  | 1.143364  |
| 48 | 1  | 0 | 4.485564  | 4.690392  | 1.614782  |
| 49 | 6  | 0 | 0.217957  | -2.340779 | 2.878238  |
| 50 | 1  | 0 | 0.623841  | -2.294758 | 3.893648  |
| 51 | 1  | 0 | -0.866889 | -2.440693 | 2.902005  |
| 52 | 1  | 0 | 0.667705  | -3.176843 | 2.342180  |
| 53 | 6  | 0 | -4.543900 | 0.521406  | -0.776391 |
| 54 | 6  | 0 | -5.738702 | 0.045994  | -1.339843 |
| 55 | 6  | 0 | -5.974727 | 0.118554  | -2.711166 |
| 56 | 6  | 0 | -5.007083 | 0.669015  | -3.555197 |
| 57 | 6  | 0 | -3.812098 | 1.148915  | -3.021859 |
| 58 | 6  | 0 | -3.588725 | 1.080509  | -1.648434 |

|    |    |   |           |           |           |
|----|----|---|-----------|-----------|-----------|
| 59 | 6  | 0 | -4.303032 | 0.455289  | 0.683015  |
| 60 | 6  | 0 | -5.303582 | 0.786915  | 1.610105  |
| 61 | 6  | 0 | -5.061727 | 0.742205  | 2.982124  |
| 62 | 6  | 0 | -3.798487 | 0.379299  | 3.456669  |
| 63 | 6  | 0 | -2.788254 | 0.041473  | 2.557145  |
| 64 | 6  | 0 | -3.051700 | 0.060680  | 1.189555  |
| 65 | 1  | 0 | -6.480032 | -0.403379 | -0.684542 |
| 66 | 1  | 0 | -6.906106 | -0.262534 | -3.120652 |
| 67 | 1  | 0 | -5.179982 | 0.723183  | -4.626536 |
| 68 | 1  | 0 | -3.041314 | 1.587197  | -3.646823 |
| 69 | 1  | 0 | -6.272948 | 1.109017  | 1.239640  |
| 70 | 1  | 0 | -5.850957 | 1.011486  | 3.678526  |
| 71 | 1  | 0 | -3.596944 | 0.367607  | 4.524441  |
| 72 | 1  | 0 | -1.788014 | -0.219723 | 2.882672  |
| 73 | 8  | 0 | -2.437532 | 1.661667  | -1.142772 |
| 74 | 8  | 0 | -2.075277 | -0.383235 | 0.313567  |
| 75 | 15 | 0 | -1.214409 | 0.730365  | -0.560867 |
| 76 | 8  | 0 | -0.558473 | -0.055695 | -1.670773 |
| 77 | 8  | 0 | -0.396907 | 1.604295  | 0.349933  |

-----

***TS<sub>TMS</sub>-Tc(S-ex)***

B3LYP-D3/6-31g(d) in gas phase

SCF Done: E(RB3LYP) = -2432.404134 hartree

Sum of electronic and thermal Free Energies = -2431.863214 hartree

The number of imaginary frequency = 1

Imaginary frequency = -323.82

-----

| Center Number | Atomic Number | Atomic Type | Coordinates (Angstroms) |           |           |
|---------------|---------------|-------------|-------------------------|-----------|-----------|
|               |               |             | X                       | Y         | Z         |
| 1             | 6             | 0           | 5.278792                | -1.806349 | -0.724416 |
| 2             | 1             | 0           | 5.379625                | -0.825137 | -0.270058 |
| 3             | 1             | 0           | 6.185019                | -2.186041 | -1.189732 |
| 4             | 6             | 0           | 4.331639                | -2.711142 | -0.269818 |
| 5             | 1             | 0           | 4.472210                | -3.740543 | -0.595980 |
| 6             | 6             | 0           | 3.106907                | -2.417724 | 0.400516  |
| 7             | 6             | 0           | 2.922109                | -1.117936 | 0.845278  |
| 8             | 1             | 0           | 3.760740                | -0.432221 | 0.935547  |
| 9             | 1             | 0           | 0.837055                | -0.975860 | 1.027456  |
| 10            | 7             | 0           | 1.762396                | -0.572108 | 1.293499  |
| 11            | 6             | 0           | 1.748186                | 0.698009  | 1.855832  |
| 12            | 8             | 0           | 0.474158                | 1.055703  | 2.089154  |
| 13            | 8             | 0           | 2.730126                | 1.377459  | 2.093024  |
| 14            | 1             | 0           | 0.957576                | 1.081817  | -1.358512 |
| 15            | 6             | 0           | 1.310294                | 5.451600  | 0.401211  |
| 16            | 6             | 0           | 2.589895                | 4.953838  | 0.235950  |
| 17            | 6             | 0           | 2.791303                | 3.668507  | -0.311527 |
| 18            | 6             | 0           | 1.657652                | 2.892657  | -0.664445 |
| 19            | 6             | 0           | 0.354089                | 3.406513  | -0.508811 |
| 20            | 6             | 0           | 0.195448                | 4.676198  | 0.015611  |
| 21            | 1             | 0           | 4.962231                | 3.674918  | -0.294101 |
| 22            | 1             | 0           | 1.161125                | 6.442669  | 0.818979  |
| 23            | 1             | 0           | 3.456510                | 5.545625  | 0.518485  |
| 24            | 6             | 0           | 4.078020                | 3.100021  | -0.556737 |
| 25            | 1             | 0           | -0.489027               | 2.792652  | -0.805191 |

|    |    |   |           |           |           |
|----|----|---|-----------|-----------|-----------|
| 26 | 1  | 0 | -0.806165 | 5.080970  | 0.132068  |
| 27 | 6  | 0 | 3.050182  | 1.074474  | -1.428108 |
| 28 | 6  | 0 | 4.206440  | 1.861590  | -1.114168 |
| 29 | 1  | 0 | 5.187506  | 1.441026  | -1.297350 |
| 30 | 7  | 0 | 1.841242  | 1.628799  | -1.172518 |
| 31 | 6  | 0 | 3.089199  | -0.240616 | -1.968157 |
| 32 | 1  | 0 | 2.137547  | -0.759334 | -2.033958 |
| 33 | 6  | 0 | 4.240720  | -0.875736 | -2.413463 |
| 34 | 1  | 0 | 5.136780  | -0.306824 | -2.642873 |
| 35 | 1  | 0 | 4.130202  | -1.785715 | -2.991438 |
| 36 | 14 | 0 | 1.864273  | -3.856713 | 0.609872  |
| 37 | 6  | 0 | 0.827402  | -4.074773 | -0.952289 |
| 38 | 1  | 0 | 0.161430  | -3.215849 | -1.073701 |
| 39 | 1  | 0 | 1.457899  | -4.170901 | -1.844969 |
| 40 | 1  | 0 | 0.211009  | -4.980134 | -0.880176 |
| 41 | 6  | 0 | 2.908298  | -5.421827 | 0.873663  |
| 42 | 1  | 0 | 3.619657  | -5.303349 | 1.699469  |
| 43 | 1  | 0 | 2.243002  | -6.256905 | 1.126292  |
| 44 | 1  | 0 | 3.472721  | -5.719357 | -0.017858 |
| 45 | 6  | 0 | 0.785510  | -3.614284 | 2.138589  |
| 46 | 1  | 0 | 1.372613  | -3.260735 | 2.994419  |
| 47 | 1  | 0 | -0.025820 | -2.907145 | 1.949456  |
| 48 | 1  | 0 | 0.336096  | -4.575260 | 2.419157  |
| 49 | 6  | 0 | 0.284757  | 2.301373  | 2.774816  |
| 50 | 1  | 0 | 0.858403  | 3.099626  | 2.301174  |
| 51 | 1  | 0 | -0.784795 | 2.499516  | 2.705923  |
| 52 | 1  | 0 | 0.590084  | 2.202840  | 3.821360  |
| 53 | 6  | 0 | -4.503947 | 0.610808  | -0.189820 |
| 54 | 6  | 0 | -5.624264 | 1.414203  | -0.457641 |
| 55 | 6  | 0 | -5.568901 | 2.803096  | -0.359443 |
| 56 | 6  | 0 | -4.376702 | 3.424343  | 0.018612  |
| 57 | 6  | 0 | -3.248332 | 2.650928  | 0.284091  |
| 58 | 6  | 0 | -3.306704 | 1.261496  | 0.170655  |
| 59 | 6  | 0 | -4.596624 | -0.866733 | -0.240655 |
| 60 | 6  | 0 | -5.706351 | -1.542213 | 0.293160  |
| 61 | 6  | 0 | -5.797381 | -2.931908 | 0.252268  |
| 62 | 6  | 0 | -4.767079 | -3.681545 | -0.321436 |
| 63 | 6  | 0 | -3.655011 | -3.035865 | -0.858427 |
| 64 | 6  | 0 | -3.580569 | -1.645321 | -0.822515 |
| 65 | 1  | 0 | -6.548538 | 0.930274  | -0.760952 |
| 66 | 1  | 0 | -6.451493 | 3.396937  | -0.579491 |
| 67 | 1  | 0 | -4.324645 | 4.506339  | 0.106630  |
| 68 | 1  | 0 | -2.313020 | 3.100059  | 0.601367  |
| 69 | 1  | 0 | -6.493105 | -0.961252 | 0.766545  |
| 70 | 1  | 0 | -6.663738 | -3.429254 | 0.679316  |
| 71 | 1  | 0 | -4.826828 | -4.766130 | -0.347633 |
| 72 | 1  | 0 | -2.836276 | -3.584092 | -1.312520 |
| 73 | 8  | 0 | -2.191802 | 0.536971  | 0.535623  |
| 74 | 8  | 0 | -2.516426 | -1.023824 | -1.451321 |
| 75 | 15 | 0 | -1.315488 | -0.354946 | -0.551605 |
| 76 | 8  | 0 | -0.555254 | 0.538769  | -1.500876 |
| 77 | 8  | 0 | -0.599106 | -1.400826 | 0.258342  |

Sum of electronic and thermal Free Energies = -2431.861293 hartree  
The number of imaginary frequency = 1  
Imaginary frequency = -333.58

| Center Number | Atomic Number | Atomic Type | Coordinates (Angstroms) |           |           |
|---------------|---------------|-------------|-------------------------|-----------|-----------|
|               |               |             | X                       | Y         | Z         |
| 1             | 6             | 0           | -5.122851               | 1.446180  | 1.158901  |
| 2             | 1             | 0           | -5.181124               | 0.431747  | 0.774536  |
| 3             | 1             | 0           | -6.006861               | 1.773286  | 1.701005  |
| 4             | 6             | 0           | -4.337931               | 2.404597  | 0.531629  |
| 5             | 1             | 0           | -4.547655               | 3.436007  | 0.810519  |
| 6             | 6             | 0           | -3.181823               | 2.187922  | -0.274952 |
| 7             | 6             | 0           | -2.909725               | 0.885499  | -0.663217 |
| 8             | 1             | 0           | -3.673509               | 0.118597  | -0.588341 |
| 9             | 1             | 0           | -0.860243               | 0.966787  | -1.100855 |
| 10            | 7             | 0           | -1.754973               | 0.442654  | -1.235773 |
| 11            | 6             | 0           | -1.583150               | -0.797793 | -1.826278 |
| 12            | 8             | 0           | -2.728332               | -1.519921 | -1.852104 |
| 13            | 8             | 0           | -0.522868               | -1.187130 | -2.273052 |
| 14            | 1             | 0           | -0.603305               | -0.925384 | 1.335758  |
| 15            | 6             | 0           | -0.765145               | -5.401599 | -0.297421 |
| 16            | 6             | 0           | -2.014155               | -5.075574 | 0.199143  |
| 17            | 6             | 0           | -2.257152               | -3.789298 | 0.726874  |
| 18            | 6             | 0           | -1.194824               | -2.846027 | 0.748787  |
| 19            | 6             | 0           | 0.074410                | -3.177258 | 0.232202  |
| 20            | 6             | 0           | 0.273486                | -4.445687 | -0.282831 |
| 21            | 1             | 0           | -4.354395               | -4.066141 | 1.216707  |
| 22            | 1             | 0           | -0.582368               | -6.391143 | -0.705487 |
| 23            | 1             | 0           | -2.824934               | -5.799602 | 0.184727  |
| 24            | 6             | 0           | -3.525071               | -3.362960 | 1.228999  |
| 25            | 1             | 0           | 0.863799                | -2.432829 | 0.225282  |
| 26            | 1             | 0           | 1.246681                | -4.703597 | -0.689710 |
| 27            | 6             | 0           | -2.618543               | -1.164086 | 1.740132  |
| 28            | 6             | 0           | -3.705761               | -2.099359 | 1.710985  |
| 29            | 1             | 0           | -4.674477               | -1.785654 | 2.080376  |
| 30            | 7             | 0           | -1.424368               | -1.593370 | 1.262001  |
| 31            | 6             | 0           | -2.704990               | 0.170966  | 2.218720  |
| 32            | 1             | 0           | -1.802025               | 0.766423  | 2.128973  |
| 33            | 6             | 0           | -3.850195               | 0.741938  | 2.761381  |
| 34            | 1             | 0           | -4.659928               | 0.122346  | 3.136320  |
| 35            | 1             | 0           | -3.750810               | 1.694439  | 3.269191  |
| 36            | 14            | 0           | -2.161872               | 3.736395  | -0.756280 |
| 37            | 6             | 0           | -1.243037               | 3.474780  | -2.382920 |
| 38            | 1             | 0           | -0.331061               | 2.890319  | -2.239917 |
| 39            | 1             | 0           | -1.873211               | 2.974322  | -3.127721 |
| 40            | 1             | 0           | -0.956280               | 4.450922  | -2.794006 |
| 41            | 6             | 0           | -1.001627               | 4.230207  | 0.644575  |
| 42            | 1             | 0           | -1.532687               | 4.298172  | 1.602115  |
| 43            | 1             | 0           | -0.197291               | 3.495366  | 0.733695  |
| 44            | 1             | 0           | -0.549081               | 5.209254  | 0.442837  |
| 45            | 6             | 0           | -3.430116               | 5.126171  | -1.024083 |
| 46            | 1             | 0           | -3.927900               | 5.441098  | -0.099471 |
| 47            | 1             | 0           | -2.913975               | 6.006627  | -1.426834 |
| 48            | 1             | 0           | -4.205680               | 4.838658  | -1.743773 |
| 49            | 6             | 0           | -2.623385               | -2.779271 | -2.539278 |

**TS<sub>TMS</sub>-Tt(R-ex)**

B3LYP-D3/6-31g(d) in gas phase

SCF Done: E(RB3LYP) = -2432.403020 hartree



|    |    |   |           |           |           |    |    |   |           |           |           |
|----|----|---|-----------|-----------|-----------|----|----|---|-----------|-----------|-----------|
| 50 | 1  | 0 | -1.813281 | -3.380810 | -2.124953 | 17 | 6  | 0 | -3.683471 | 2.978090  | 0.610024  |
| 51 | 1  | 0 | -3.584529 | -3.270678 | -2.385584 | 18 | 6  | 0 | -2.343509 | 2.514351  | 0.534977  |
| 52 | 1  | 0 | -2.443756 | -2.612223 | -3.605221 | 19 | 6  | 0 | -1.347776 | 3.279761  | -0.105569 |
| 53 | 6  | 0 | 4.363026  | 0.110015  | -0.746756 | 20 | 6  | 0 | -1.695462 | 4.500577  | -0.653395 |
| 54 | 6  | 0 | 5.365967  | 0.264803  | -1.717316 | 21 | 1  | 0 | -5.669880 | 2.455683  | 1.315190  |
| 55 | 6  | 0 | 5.103453  | 0.042293  | -3.067828 | 22 | 1  | 0 | -3.268897 | 5.944983  | -1.017904 |
| 56 | 6  | 0 | 3.821568  | -0.334558 | -3.478678 | 23 | 1  | 0 | -5.025142 | 4.590103  | 0.098520  |
| 57 | 6  | 0 | 2.805661  | -0.495492 | -2.537450 | 24 | 6  | 0 | -4.635546 | 2.126719  | 1.250391  |
| 58 | 6  | 0 | 3.087988  | -0.281173 | -1.191110 | 25 | 1  | 0 | -0.339176 | 2.885245  | -0.162034 |
| 59 | 6  | 0 | 4.635943  | 0.326580  | 0.693153  | 26 | 1  | 0 | -0.936579 | 5.093606  | -1.155136 |
| 60 | 6  | 0 | 5.816549  | -0.154349 | 1.282564  | 27 | 6  | 0 | -2.905422 | 0.475069  | 1.697442  |
| 61 | 6  | 0 | 6.090166  | 0.043745  | 2.634274  | 28 | 6  | 0 | -4.266688 | 0.920864  | 1.772844  |
| 62 | 6  | 0 | 5.173765  | 0.728847  | 3.435525  | 29 | 1  | 0 | -4.999361 | 0.283199  | 2.252169  |
| 63 | 6  | 0 | 3.993663  | 1.216392  | 2.877089  | 30 | 7  | 0 | -2.023881 | 1.296157  | 1.078945  |
| 64 | 6  | 0 | 3.732788  | 1.021440  | 1.522205  | 31 | 6  | 0 | -2.422363 | -0.759483 | 2.209873  |
| 65 | 1  | 0 | 6.354966  | 0.585261  | -1.401203 | 32 | 1  | 0 | -1.372835 | -0.970282 | 2.030350  |
| 66 | 1  | 0 | 5.894894  | 0.176772  | -3.800130 | 33 | 6  | 0 | -3.197667 | -1.691062 | 2.886807  |
| 67 | 1  | 0 | 3.610633  | -0.497233 | -4.532272 | 34 | 1  | 0 | -4.147731 | -1.411411 | 3.332408  |
| 68 | 1  | 0 | 1.795092  | -0.779616 | -2.809652 | 35 | 1  | 0 | -2.692501 | -2.506184 | 3.391689  |
| 69 | 1  | 0 | 6.516320  | -0.709496 | 0.663794  | 36 | 14 | 0 | -0.786460 | -4.039545 | -0.660773 |
| 70 | 1  | 0 | 7.009829  | -0.345086 | 3.062627  | 37 | 6  | 0 | 0.555129  | -3.966197 | 0.664749  |
| 71 | 1  | 0 | 5.374769  | 0.882395  | 4.492268  | 38 | 1  | 0 | 0.973085  | -2.957817 | 0.713008  |
| 72 | 1  | 0 | 3.262971  | 1.759231  | 3.467347  | 39 | 1  | 0 | 0.162288  | -4.239929 | 1.651761  |
| 73 | 8  | 0 | 2.096035  | -0.534050 | -0.255606 | 40 | 1  | 0 | 1.368338  | -4.662766 | 0.423277  |
| 74 | 8  | 0 | 2.604932  | 1.620583  | 0.987917  | 41 | 6  | 0 | -0.135875 | -3.561547 | -2.364391 |
| 75 | 15 | 0 | 1.323735  | 0.737718  | 0.463413  | 42 | 1  | 0 | -0.954200 | -3.392469 | -3.074343 |
| 76 | 8  | 0 | 0.608477  | 1.593231  | -0.547100 | 43 | 1  | 0 | 0.485971  | -2.664583 | -2.320733 |
| 77 | 8  | 0 | 0.563289  | 0.121515  | 1.614702  | 44 | 1  | 0 | 0.479149  | -4.380971 | -2.757415 |

-----

**TS<sub>TMS</sub>-Tt(S-ex)**

B3LYP-D3/6-31g(d) in gas phase

SCF Done: E(RB3LYP) = -2432.398798 hartree

Sum of electronic and thermal Free Energies = -2431.858825 hartree

The number of imaginary frequency = 1

Imaginary frequency = -323.82

-----

| Center Number | Atomic Number | Atomic Type | Coordinates (Angstroms) |           |           |
|---------------|---------------|-------------|-------------------------|-----------|-----------|
|               |               |             | X                       | Y         | Z         |
| 1             | 6             | 0           | -4.255857               | -2.923765 | 1.426530  |
| 2             | 1             | 0           | -4.715317               | -2.022258 | 1.031498  |
| 3             | 1             | 0           | -4.906515               | -3.523149 | 2.058647  |
| 4             | 6             | 0           | -3.215969               | -3.552505 | 0.757003  |
| 5             | 1             | 0           | -2.999679               | -4.569214 | 1.081293  |
| 6             | 6             | 0           | -2.288251               | -2.966556 | -0.154550 |
| 7             | 6             | 0           | -2.562963               | -1.685147 | -0.609039 |
| 8             | 1             | 0           | -3.559737               | -1.269497 | -0.501102 |
| 9             | 1             | 0           | -0.670020               | -0.993432 | -1.190706 |
| 10            | 7             | 0           | -1.705566               | -0.863540 | -1.272770 |
| 11            | 6             | 0           | -2.057996               | 0.327314  | -1.889886 |
| 12            | 8             | 0           | -3.399280               | 0.526358  | -1.892478 |
| 13            | 8             | 0           | -1.250318               | 1.094065  | -2.370642 |
| 14            | 1             | 0           | -1.000791               | 1.014818  | 1.039886  |
| 15            | 6             | 0           | -3.020705               | 4.982810  | -0.580106 |
| 16            | 6             | 0           | -4.000778               | 4.230817  | 0.041970  |

|    |   |   |           |           |           |
|----|---|---|-----------|-----------|-----------|
| 45 | 6 | 0 | -1.432251 | -5.823596 | -0.767562 |
| 46 | 1 | 0 | -0.640275 | -6.465293 | -1.173614 |
| 47 | 1 | 0 | -1.716429 | -6.240948 | 0.205498  |
| 48 | 1 | 0 | -2.298205 | -5.904147 | -1.435164 |
| 49 | 6 | 0 | -3.826003 | 1.697495  | -2.609640 |
| 50 | 1 | 0 | -4.899843 | 1.767424  | -2.432779 |
| 51 | 1 | 0 | -3.316479 | 2.588276  | -2.239928 |
| 52 | 1 | 0 | -3.620364 | 1.580195  | -3.677553 |
| 53 | 6 | 0 | 4.814782  | 0.022145  | 0.184482  |
| 54 | 6 | 0 | 6.072504  | -0.433497 | -0.242816 |
| 55 | 6 | 0 | 6.386415  | -1.790799 | -0.258660 |
| 56 | 6 | 0 | 5.436478  | -2.729121 | 0.152224  |
| 57 | 6 | 0 | 4.180095  | -2.304084 | 0.580029  |
| 58 | 6 | 0 | 3.877949  | -0.943799 | 0.597101  |
| 59 | 6 | 0 | 4.495380  | 1.468054  | 0.210638  |
| 60 | 6 | 0 | 5.429144  | 2.409252  | 0.673304  |
| 61 | 6 | 0 | 5.146692  | 3.773688  | 0.676384  |
| 62 | 6 | 0 | 3.909870  | 4.228812  | 0.213223  |
| 63 | 6 | 0 | 2.964823  | 3.315120  | -0.249330 |
| 64 | 6 | 0 | 3.255816  | 1.952109  | -0.248805 |
| 65 | 1 | 0 | 6.801365  | 0.295616  | -0.585966 |
| 66 | 1 | 0 | 7.364944  | -2.115476 | -0.601321 |
| 67 | 1 | 0 | 5.670810  | -3.790083 | 0.137137  |
| 68 | 1 | 0 | 3.421182  | -3.005363 | 0.909640  |
| 69 | 1 | 0 | 6.383046  | 2.052547  | 1.051959  |
| 70 | 1 | 0 | 5.886137  | 4.478250  | 1.046661  |
| 71 | 1 | 0 | 3.680487  | 5.290983  | 0.213287  |
| 72 | 1 | 0 | 2.000459  | 3.635620  | -0.630182 |
| 73 | 8 | 0 | 2.660950  | -0.547444 | 1.123044  |

|    |    |   |          |           |           |
|----|----|---|----------|-----------|-----------|
| 74 | 8  | 0 | 2.333730 | 1.084397  | -0.802772 |
| 75 | 15 | 0 | 1.474934 | 0.048031  | 0.147273  |
| 76 | 8  | 0 | 0.940031 | -1.025463 | -0.760123 |
| 77 | 8  | 0 | 0.550152 | 0.805868  | 1.069600  |

**(R=SPh)**

***TS<sub>SPh</sub>-Cc(R-en)***

B3LYP-D3/6-31g(d) in gas phase

SCF Done: E(RB3LYP) = -2652.956697 hartree

Sum of electronic and thermal Free Energies = -2652.435587 hartree

The number of imaginary frequency = 1

Imaginary frequency = -362.51

| Center Number | Atomic Number | Atomic Type | Coordinates (Angstroms) |           |           |
|---------------|---------------|-------------|-------------------------|-----------|-----------|
|               |               |             | X                       | Y         | Z         |
| 1             | 6             | 0           | 0.402358                | -1.911053 | 3.114362  |
| 2             | 1             | 0           | 1.153596                | -1.717993 | 2.356099  |
| 3             | 1             | 0           | 0.789827                | -2.397846 | 4.006310  |
| 4             | 6             | 0           | -0.914503               | -2.193444 | 2.762455  |
| 5             | 1             | 0           | -1.528468               | -2.695829 | 3.508008  |
| 6             | 6             | 0           | -0.898586               | -1.104826 | 0.585998  |
| 7             | 1             | 0           | 0.182116                | -1.184936 | 0.612137  |
| 8             | 1             | 0           | -0.545995               | -0.378206 | -1.265034 |
| 9             | 7             | 0           | -1.305978               | -0.503923 | -0.560401 |
| 10            | 6             | 0           | -2.521576               | 0.110111  | -0.831214 |
| 11            | 8             | 0           | -2.594128               | 0.355735  | -2.153072 |
| 12            | 8             | 0           | -3.364314               | 0.423351  | -0.015816 |
| 13            | 1             | 0           | 0.142149                | 2.128277  | 0.365372  |
| 14            | 6             | 0           | -3.798548               | 4.557592  | -0.712457 |
| 15            | 6             | 0           | -3.983613               | 3.949169  | 0.516913  |
| 16            | 6             | 0           | -2.963494               | 3.160063  | 1.085690  |
| 17            | 6             | 0           | -1.745503               | 3.010607  | 0.374861  |
| 18            | 6             | 0           | -1.558584               | 3.624641  | -0.878831 |
| 19            | 6             | 0           | -2.582171               | 4.390660  | -1.408618 |
| 20            | 1             | 0           | -4.014736               | 2.565490  | 2.890552  |
| 21            | 1             | 0           | -4.589583               | 5.162297  | -1.145792 |
| 22            | 1             | 0           | -4.920715               | 4.062897  | 1.055549  |
| 23            | 6             | 0           | -3.085689               | 2.473733  | 2.334408  |
| 24            | 1             | 0           | -0.619418               | 3.475956  | -1.403678 |
| 25            | 1             | 0           | -2.446733               | 4.866557  | -2.375651 |
| 26            | 6             | 0           | -0.841651               | 1.573628  | 2.093377  |
| 27            | 6             | 0           | -2.071048               | 1.704566  | 2.819252  |
| 28            | 1             | 0           | -2.176667               | 1.181424  | 3.761426  |
| 29            | 7             | 0           | -0.749566               | 2.237165  | 0.912401  |
| 30            | 6             | 0           | 0.311714                | 0.871720  | 2.532503  |
| 31            | 1             | 0           | 1.189672                | 0.958943  | 1.900187  |
| 32            | 6             | 0           | 0.415103                | 0.098239  | 3.686147  |
| 33            | 1             | 0           | -0.382653               | 0.092328  | 4.423031  |
| 34            | 1             | 0           | 1.406237                | -0.036981 | 4.109386  |
| 35            | 6             | 0           | 5.212043                | 0.144971  | -0.361130 |
| 36            | 6             | 0           | 6.418153                | 0.541890  | 0.238243  |
| 37            | 6             | 0           | 6.925942                | 1.827351  | 0.062325  |
| 38            | 6             | 0           | 6.227784                | 2.750929  | -0.719961 |
| 39            | 6             | 0           | 5.028094                | 2.382128  | -1.325937 |

|    |    |   |           |           |           |
|----|----|---|-----------|-----------|-----------|
| 40 | 6  | 0 | 4.533799  | 1.091814  | -1.150841 |
| 41 | 6  | 0 | 4.681859  | -1.226551 | -0.190065 |
| 42 | 6  | 0 | 5.526442  | -2.345350 | -0.263429 |
| 43 | 6  | 0 | 5.034682  | -3.639921 | -0.107367 |
| 44 | 6  | 0 | 3.670914  | -3.842436 | 0.113616  |
| 45 | 6  | 0 | 2.810575  | -2.748100 | 0.189975  |
| 46 | 6  | 0 | 3.313697  | -1.454615 | 0.053718  |
| 47 | 1  | 0 | 6.947851  | -0.169972 | 0.865536  |
| 48 | 1  | 0 | 7.858371  | 2.110733  | 0.542520  |
| 49 | 1  | 0 | 6.613993  | 3.757325  | -0.856086 |
| 50 | 1  | 0 | 4.461215  | 3.071826  | -1.941950 |
| 51 | 1  | 0 | 6.581482  | -2.187545 | -0.469416 |
| 52 | 1  | 0 | 5.710692  | -4.487521 | -0.175395 |
| 53 | 1  | 0 | 3.274426  | -4.848392 | 0.220076  |
| 54 | 1  | 0 | 1.746177  | -2.883946 | 0.350215  |
| 55 | 8  | 0 | 3.391984  | 0.720381  | -1.842149 |
| 56 | 8  | 0 | 2.460737  | -0.383444 | 0.254643  |
| 57 | 15 | 0 | 1.968470  | 0.567421  | -1.039662 |
| 58 | 8  | 0 | 1.553695  | 1.878653  | -0.417673 |
| 59 | 8  | 0 | 1.030825  | -0.220792 | -1.905405 |
| 60 | 6  | 0 | -3.797064 | 1.017868  | -2.571406 |
| 61 | 1  | 0 | -3.918928 | 1.967981  | -2.045149 |
| 62 | 1  | 0 | -3.675011 | 1.183057  | -3.642298 |
| 63 | 1  | 0 | -4.661887 | 0.376993  | -2.377822 |
| 64 | 6  | 0 | -1.600321 | -1.758485 | 1.596354  |
| 65 | 16 | 0 | -3.352445 | -2.121663 | 1.603535  |
| 66 | 6  | 0 | -3.685018 | -2.639523 | -0.078903 |
| 67 | 6  | 0 | -2.796583 | -3.438076 | -0.808711 |
| 68 | 6  | 0 | -4.897906 | -2.242108 | -0.656927 |
| 69 | 6  | 0 | -3.113613 | -3.820186 | -2.111775 |
| 70 | 1  | 0 | -1.853983 | -3.742148 | -0.364307 |
| 71 | 6  | 0 | -5.220631 | -2.652827 | -1.950672 |
| 72 | 1  | 0 | -5.566422 | -1.589789 | -0.104113 |
| 73 | 6  | 0 | -4.327091 | -3.434999 | -2.685456 |
| 74 | 1  | 0 | -2.409305 | -4.423539 | -2.677869 |
| 75 | 1  | 0 | -6.165266 | -2.343691 | -2.390788 |
| 76 | 1  | 0 | -4.571359 | -3.737312 | -3.699904 |

***TS<sub>SPh</sub>-Cc(S-en)***

B3LYP-D3/6-31g(d) in gas phase

SCF Done: E(RB3LYP) = -2652.955644 hartree

Sum of electronic and thermal Free Energies = -2652.435186 hartree

The number of imaginary frequency = 1

Imaginary frequency = -351.66

| Center Number | Atomic Number | Atomic Type | Coordinates (Angstroms) |           |          |
|---------------|---------------|-------------|-------------------------|-----------|----------|
|               |               |             | X                       | Y         | Z        |
| 1             | 6             | 0           | 0.156130                | -0.089761 | 3.816338 |
| 2             | 1             | 0           | 0.940357                | 0.184836  | 3.117726 |
| 3             | 1             | 0           | 0.496185                | -0.216656 | 4.841242 |
| 4             | 6             | 0           | -1.153946               | 0.331424  | 3.624449 |
| 5             | 1             | 0           | -1.815338               | 0.305988  | 4.488834 |
| 6             | 6             | 0           | -1.000605               | 0.687477  | 1.226732 |
| 7             | 1             | 0           | 0.073909                | 0.768529  | 1.355396 |

|    |    |   |           |           |           |
|----|----|---|-----------|-----------|-----------|
| 8  | 1  | 0 | -0.494479 | 1.104606  | -0.661286 |
| 9  | 7  | 0 | -1.319664 | 0.842327  | -0.081890 |
| 10 | 6  | 0 | -2.493967 | 0.513601  | -0.743893 |
| 11 | 8  | 0 | -2.456933 | 1.053925  | -1.977888 |
| 12 | 8  | 0 | -3.392342 | -0.180533 | -0.315062 |
| 13 | 1  | 0 | 0.032284  | -1.902434 | -0.800064 |
| 14 | 6  | 0 | -3.853405 | -3.243344 | -3.170318 |
| 15 | 6  | 0 | -4.093119 | -3.407749 | -1.817420 |
| 16 | 6  | 0 | -3.098671 | -3.087107 | -0.870756 |
| 17 | 6  | 0 | -1.852167 | -2.597808 | -1.337367 |
| 18 | 6  | 0 | -1.607732 | -2.427360 | -2.713986 |
| 19 | 6  | 0 | -2.606629 | -2.752252 | -3.614721 |
| 20 | 1  | 0 | -4.224502 | -3.565980 | 0.923184  |
| 21 | 1  | 0 | -4.624380 | -3.490649 | -3.893933 |
| 22 | 1  | 0 | -5.052767 | -3.777365 | -1.465810 |
| 23 | 6  | 0 | -3.273042 | -3.203689 | 0.543322  |
| 24 | 1  | 0 | -0.644502 | -2.040067 | -3.033343 |
| 25 | 1  | 0 | -2.427989 | -2.624464 | -4.678559 |
| 26 | 6  | 0 | -1.024224 | -2.368208 | 0.918390  |
| 27 | 6  | 0 | -2.278657 | -2.855613 | 1.408378  |
| 28 | 1  | 0 | -2.423036 | -2.935486 | 2.478646  |
| 29 | 7  | 0 | -0.881915 | -2.268068 | -0.426993 |
| 30 | 6  | 0 | 0.109418  | -2.038960 | 1.709143  |
| 31 | 1  | 0 | 0.991626  | -1.743755 | 1.152898  |
| 32 | 6  | 0 | 0.195240  | -2.079520 | 3.096169  |
| 33 | 1  | 0 | -0.606880 | -2.507228 | 3.689956  |
| 34 | 1  | 0 | 1.181171  | -2.192624 | 3.537517  |
| 35 | 6  | 0 | -3.619048 | 0.788055  | -2.778426 |
| 36 | 1  | 0 | -4.500821 | 1.240787  | -2.316095 |
| 37 | 1  | 0 | -3.412945 | 1.250044  | -3.744434 |
| 38 | 1  | 0 | -3.774858 | -0.287870 | -2.890090 |
| 39 | 6  | 0 | 5.141000  | -0.210968 | 0.296214  |
| 40 | 6  | 0 | 6.334704  | -0.864812 | 0.641923  |
| 41 | 6  | 0 | 6.335440  | -2.028418 | 1.407782  |
| 42 | 6  | 0 | 5.124516  | -2.572164 | 1.840227  |
| 43 | 6  | 0 | 3.925126  | -1.944262 | 1.509416  |
| 44 | 6  | 0 | 3.931165  | -0.773878 | 0.750007  |
| 45 | 6  | 0 | 5.166857  | 1.031430  | -0.508626 |
| 46 | 6  | 0 | 6.111318  | 2.041093  | -0.261801 |
| 47 | 6  | 0 | 6.150081  | 3.200381  | -1.033413 |
| 48 | 6  | 0 | 5.233350  | 3.376603  | -2.073229 |
| 49 | 6  | 0 | 4.285048  | 2.390293  | -2.337743 |
| 50 | 6  | 0 | 4.261338  | 1.231760  | -1.565254 |
| 51 | 1  | 0 | 7.273496  | -0.454508 | 0.280425  |
| 52 | 1  | 0 | 7.275098  | -2.514931 | 1.653557  |
| 53 | 1  | 0 | 5.110590  | -3.485207 | 2.429255  |
| 54 | 1  | 0 | 2.974165  | -2.354509 | 1.830561  |
| 55 | 1  | 0 | 6.807737  | 1.914378  | 0.562578  |
| 56 | 1  | 0 | 6.886582  | 3.969187  | -0.816968 |
| 57 | 1  | 0 | 5.252842  | 4.281608  | -2.674146 |
| 58 | 1  | 0 | 3.557443  | 2.493177  | -3.135504 |
| 59 | 8  | 0 | 2.730182  | -0.120050 | 0.541283  |
| 60 | 8  | 0 | 3.370829  | 0.224991  | -1.903148 |
| 61 | 15 | 0 | 2.034853  | 0.003460  | -0.975367 |
| 62 | 8  | 0 | 1.452337  | -1.330606 | -1.372321 |
| 63 | 8  | 0 | 1.183550  | 1.240355  | -0.918283 |
| 64 | 6  | 0 | -1.774588 | 0.638784  | 2.383397  |

|    |    |   |           |          |           |
|----|----|---|-----------|----------|-----------|
| 65 | 16 | 0 | -3.539476 | 0.907915 | 2.491130  |
| 66 | 6  | 0 | -3.821931 | 2.306852 | 1.408227  |
| 67 | 6  | 0 | -5.000032 | 2.316733 | 0.649619  |
| 68 | 6  | 0 | -2.930206 | 3.382284 | 1.320141  |
| 69 | 6  | 0 | -5.285985 | 3.401757 | -0.179277 |
| 70 | 1  | 0 | -5.669568 | 1.463343 | 0.688236  |
| 71 | 6  | 0 | -3.209834 | 4.449965 | 0.467374  |
| 72 | 1  | 0 | -2.014467 | 3.374388 | 1.902907  |
| 73 | 6  | 0 | -4.389006 | 4.467597 | -0.280178 |
| 74 | 1  | 0 | -6.204110 | 3.403729 | -0.761259 |
| 75 | 1  | 0 | -2.503109 | 5.271841 | 0.391923  |
| 76 | 1  | 0 | -4.604455 | 5.303004 | -0.940436 |

-----

**TS<sub>SPh</sub>-Ct(R-en)**

B3LYP-D3/6-31g(d) in gas phase

SCF Done: E(RB3LYP) = -2652.952557 hartree

Sum of electronic and thermal Free Energies = -2652.430757 hartree

The number of imaginary frequency = 1

Imaginary frequency = -374.96

-----

| Center Number | Atomic Number | Atomic Type | Coordinates (Angstroms) |           |           |
|---------------|---------------|-------------|-------------------------|-----------|-----------|
|               |               |             | X                       | Y         | Z         |
| 1             | 6             | 0           | 0.097473                | -2.888111 | 1.721025  |
| 2             | 1             | 0           | 0.999478                | -2.462803 | 1.293001  |
| 3             | 1             | 0           | 0.283798                | -3.648208 | 2.476062  |
| 4             | 6             | 0           | -1.045406               | -3.048480 | 0.938252  |
| 5             | 1             | 0           | -1.775289               | -3.787632 | 1.262130  |
| 6             | 6             | 0           | -0.605779               | -1.235266 | -0.637719 |
| 7             | 1             | 0           | 0.430201                | -1.252219 | -0.314568 |
| 8             | 1             | 0           | 0.063097                | 0.125176  | -1.968557 |
| 9             | 7             | 0           | -0.814150               | -0.262013 | -1.555438 |
| 10            | 6             | 0           | -1.980999               | 0.403321  | -1.938448 |
| 11            | 8             | 0           | -2.961246               | 0.264888  | -1.029167 |
| 12            | 8             | 0           | -2.042472               | 1.087349  | -2.935162 |
| 13            | 1             | 0           | 0.267842                | 1.820453  | 0.454656  |
| 14            | 6             | 0           | -3.367843               | 4.721660  | -0.533723 |
| 15            | 6             | 0           | -3.779182               | 3.827194  | 0.438169  |
| 16            | 6             | 0           | -2.900154               | 2.828023  | 0.906685  |
| 17            | 6             | 0           | -1.585581               | 2.773875  | 0.374367  |
| 18            | 6             | 0           | -1.168669               | 3.685762  | -0.615040 |
| 19            | 6             | 0           | -2.060891               | 4.643676  | -1.060988 |
| 20            | 1             | 0           | -4.251143               | 1.871062  | 2.313524  |
| 21            | 1             | 0           | -4.051007               | 5.483071  | -0.897512 |
| 22            | 1             | 0           | -4.786168               | 3.873509  | 0.845076  |
| 23            | 6             | 0           | -3.253193               | 1.846523  | 1.883676  |
| 24            | 1             | 0           | -0.161541               | 3.607705  | -1.013324 |
| 25            | 1             | 0           | -1.751001               | 5.341797  | -1.832680 |
| 26            | 6             | 0           | -1.042557               | 0.844370  | 1.722483  |
| 27            | 6             | 0           | -2.365051               | 0.888648  | 2.273564  |
| 28            | 1             | 0           | -2.636096               | 0.163354  | 3.030210  |
| 29            | 7             | 0           | -0.723825               | 1.803744  | 0.817494  |
| 30            | 6             | 0           | -0.018652               | -0.061952 | 2.106176  |
| 31            | 1             | 0           | 0.978209                | 0.169570  | 1.743108  |
| 32            | 6             | 0           | -0.172517               | -1.194320 | 2.906535  |

|    |    |   |           |           |           |    |   |   |           |           |           |
|----|----|---|-----------|-----------|-----------|----|---|---|-----------|-----------|-----------|
| 33 | 1  | 0 | -1.130138 | -1.414940 | 3.370960  | 1  | 6 | 0 | -0.122091 | 0.418773  | 3.814990  |
| 34 | 1  | 0 | 0.682791  | -1.511122 | 3.496121  | 2  | 1 | 0 | 0.691202  | 0.727416  | 3.165955  |
| 35 | 6  | 0 | -4.230794 | 0.817810  | -1.419175 | 3  | 1 | 0 | 0.137100  | 0.387347  | 4.870255  |
| 36 | 1  | 0 | -4.130374 | 1.883133  | -1.633821 | 4  | 6 | 0 | -1.444394 | 0.688573  | 3.487730  |
| 37 | 1  | 0 | -4.609000 | 0.295336  | -2.301466 | 5  | 1 | 0 | -2.171018 | 0.650529  | 4.297359  |
| 38 | 1  | 0 | -4.887793 | 0.644794  | -0.567869 | 6  | 6 | 0 | -1.121212 | 0.895589  | 1.092828  |
| 39 | 6  | 0 | 4.957204  | -1.268253 | -0.125232 | 7  | 1 | 0 | -0.074132 | 1.060672  | 1.325948  |
| 40 | 6  | 0 | 5.838181  | -2.326537 | -0.397974 | 8  | 1 | 0 | -0.388842 | 1.220015  | -0.725022 |
| 41 | 6  | 0 | 5.372035  | -3.571702 | -0.815573 | 9  | 7 | 0 | -1.276818 | 0.951019  | -0.251560 |
| 42 | 6  | 0 | 4.001525  | -3.779950 | -0.983224 | 10 | 6 | 0 | -2.299352 | 0.609223  | -1.134250 |
| 43 | 6  | 0 | 3.105177  | -2.745077 | -0.719903 | 11 | 8 | 0 | -3.255361 | -0.134837 | -0.557985 |
| 44 | 6  | 0 | 3.578926  | -1.508697 | -0.282893 | 12 | 8 | 0 | -2.263934 | 0.916013  | -2.306337 |
| 45 | 6  | 0 | 5.459928  | 0.052421  | 0.316124  | 13 | 1 | 0 | 0.130573  | -1.722196 | -0.671676 |
| 46 | 6  | 0 | 6.488185  | 0.161190  | 1.266146  | 14 | 6 | 0 | -3.480372 | -3.738288 | -3.006467 |
| 47 | 6  | 0 | 6.973528  | 1.403178  | 1.669961  | 15 | 6 | 0 | -3.741401 | -3.824480 | -1.650320 |
| 48 | 6  | 0 | 6.430988  | 2.572082  | 1.129967  | 16 | 6 | 0 | -2.839714 | -3.277435 | -0.713401 |
| 49 | 6  | 0 | 5.409453  | 2.491968  | 0.185225  | 17 | 6 | 0 | -1.655439 | -2.658362 | -1.191387 |
| 50 | 6  | 0 | 4.937858  | 1.245076  | -0.217807 | 18 | 6 | 0 | -1.398220 | -2.556545 | -2.572502 |
| 51 | 1  | 0 | 6.906115  | -2.152473 | -0.299955 | 19 | 6 | 0 | -2.309883 | -3.095228 | -3.463303 |
| 52 | 1  | 0 | 6.077354  | -4.370515 | -1.026351 | 20 | 1 | 0 | -3.966155 | -3.727991 | 1.089014  |
| 53 | 1  | 0 | 3.628904  | -4.741417 | -1.325322 | 21 | 1 | 0 | -4.179603 | -4.157900 | -3.723385 |
| 54 | 1  | 0 | 2.037609  | -2.881982 | -0.856225 | 22 | 1 | 0 | -4.647358 | -4.304751 | -1.289195 |
| 55 | 1  | 0 | 6.893009  | -0.747891 | 1.702602  | 23 | 6 | 0 | -3.054376 | -3.281270 | 0.700547  |
| 56 | 1  | 0 | 7.765859  | 1.458962  | 2.411177  | 24 | 1 | 0 | -0.493743 | -2.055256 | -2.903834 |
| 57 | 1  | 0 | 6.799690  | 3.544411  | 1.444756  | 25 | 1 | 0 | -2.120689 | -3.018703 | -4.529844 |
| 58 | 1  | 0 | 4.967373  | 3.377905  | -0.257693 | 26 | 6 | 0 | -0.927323 | -2.162088 | 1.055762  |
| 59 | 8  | 0 | 2.663916  | -0.536449 | 0.085771  | 27 | 6 | 0 | -2.142498 | -2.735404 | 1.554865  |
| 60 | 8  | 0 | 3.991853  | 1.191745  | -1.229701 | 28 | 1 | 0 | -2.315517 | -2.738940 | 2.623837  |
| 61 | 15 | 0 | 2.435078  | 0.823390  | -0.873335 | 29 | 7 | 0 | -0.759395 | -2.143770 | -0.289712 |
| 62 | 8  | 0 | 1.740916  | 0.428946  | -2.142258 | 30 | 6 | 0 | 0.144214  | -1.673512 | 1.850845  |
| 63 | 8  | 0 | 1.830097  | 1.845958  | 0.059637  | 31 | 1 | 0 | 1.020033  | -1.341131 | 1.306426  |
| 64 | 6  | 0 | -1.434472 | -2.254308 | -0.171345 | 32 | 6 | 0 | 0.178162  | -1.605827 | 3.238566  |
| 65 | 16 | 0 | -2.879821 | -2.777766 | -1.096177 | 33 | 1 | 0 | -0.596852 | -2.071445 | 3.839472  |
| 66 | 6  | 0 | -4.299733 | -2.233477 | -0.153965 | 34 | 1 | 0 | 1.153110  | -1.575244 | 3.715890  |
| 67 | 6  | 0 | -5.555213 | -2.357073 | -0.767360 | 35 | 6 | 0 | -4.383206 | -0.412490 | -1.405441 |
| 68 | 6  | 0 | -4.214603 | -1.697445 | 1.133643  | 36 | 1 | 0 | -4.863666 | 0.522548  | -1.702620 |
| 69 | 6  | 0 | -6.704362 | -1.937061 | -0.099007 | 37 | 1 | 0 | -4.065616 | -0.968119 | -2.289327 |
| 70 | 1  | 0 | -5.631460 | -2.767260 | -1.771208 | 38 | 1 | 0 | -5.054883 | -1.013721 | -0.793209 |
| 71 | 6  | 0 | -5.368015 | -1.271481 | 1.792723  | 39 | 6 | 0 | 5.259321  | -0.240777 | 0.304738  |
| 72 | 1  | 0 | -3.246289 | -1.591604 | 1.604533  | 40 | 6 | 0 | 6.417157  | -0.984552 | 0.583655  |
| 73 | 6  | 0 | -6.618482 | -1.385955 | 1.182441  | 41 | 6 | 0 | 6.364228  | -2.171462 | 1.311327  |
| 74 | 1  | 0 | -7.670515 | -2.033736 | -0.587130 | 42 | 6 | 0 | 5.135230  | -2.646790 | 1.773201  |
| 75 | 1  | 0 | -5.286051 | -0.849413 | 2.791867  | 43 | 6 | 0 | 3.970104  | -1.929043 | 1.508619  |
| 76 | 1  | 0 | -7.515039 | -1.054996 | 1.698680  | 44 | 6 | 0 | 4.031970  | -0.737444 | 0.786292  |

-----  
***TS<sub>SPI</sub>-Ct(S-en)***

B3LYP-D3/6-31g(d) in gas phase

SCF Done: E(RB3LYP) = -2652.951717 hartree

Sum of electronic and thermal Free Energies = -2652.430539 hartree

The number of imaginary frequency = 1

Imaginary frequency = -344.06

-----  
Center Atomic Atomic Coordinates (Angstroms)  
Number Number Type X Y Z  
-----

|    |   |   |          |           |           |
|----|---|---|----------|-----------|-----------|
| 45 | 6 | 0 | 5.336432 | 1.027585  | -0.455423 |
| 46 | 6 | 0 | 6.352151 | 1.964950  | -0.206617 |
| 47 | 6 | 0 | 6.436528 | 3.151415  | -0.931980 |
| 48 | 6 | 0 | 5.494505 | 3.429032  | -1.925949 |
| 49 | 6 | 0 | 4.475845 | 2.515929  | -2.192027 |
| 50 | 6 | 0 | 4.406489 | 1.329182  | -1.466439 |
| 51 | 1 | 0 | 7.368708 | -0.626159 | 0.200900  |
| 52 | 1 | 0 | 7.276326 | -2.728641 | 1.505657  |
| 53 | 1 | 0 | 5.080813 | -3.575991 | 2.333961  |
| 54 | 1 | 0 | 3.003985 | -2.280721 | 1.855019  |
| 55 | 1 | 0 | 7.069185 | 1.759986  | 0.583657  |
| 56 | 1 | 0 | 7.228562 | 3.862573  | -0.714513 |
| 57 | 1 | 0 | 5.549399 | 4.355754  | -2.490443 |

|    |    |   |           |           |           |
|----|----|---|-----------|-----------|-----------|
| 58 | 1  | 0 | 3.727972  | 2.697322  | -2.956417 |
| 59 | 8  | 0 | 2.873040  | 0.003587  | 0.638430  |
| 60 | 8  | 0 | 3.444376  | 0.394678  | -1.814706 |
| 61 | 15 | 0 | 2.135099  | 0.185227  | -0.848477 |
| 62 | 8  | 0 | 1.506783  | -1.122957 | -1.263187 |
| 63 | 8  | 0 | 1.310277  | 1.435893  | -0.725142 |
| 64 | 6  | 0 | -1.989166 | 0.850610  | 2.182844  |
| 65 | 16 | 0 | -3.775532 | 0.933144  | 2.161746  |
| 66 | 6  | 0 | -4.162353 | 2.263852  | 1.030680  |
| 67 | 6  | 0 | -5.432502 | 2.238985  | 0.436056  |
| 68 | 6  | 0 | -3.288490 | 3.320546  | 0.748426  |
| 69 | 6  | 0 | -5.819365 | 3.259493  | -0.431878 |
| 70 | 1  | 0 | -6.111469 | 1.416686  | 0.646117  |
| 71 | 6  | 0 | -3.675565 | 4.324006  | -0.140274 |
| 72 | 1  | 0 | -2.309274 | 3.357070  | 1.213161  |
| 73 | 6  | 0 | -4.939074 | 4.301000  | -0.732364 |
| 74 | 1  | 0 | -6.806643 | 3.230216  | -0.885424 |
| 75 | 1  | 0 | -2.981591 | 5.128874  | -0.366062 |
| 76 | 1  | 0 | -5.233888 | 5.084937  | -1.423798 |

-----  
***TS<sub>Sph</sub>-Tc(R-ex)***

B3LYP-D3/6-31g(d) in gas phase

SCF Done: E(RB3LYP) = -2652.966873 hartree

Sum of electronic and thermal Free Energies = -2652.445841 hartree

The number of imaginary frequency = 1

Imaginary frequency = -356.49

| Center Number | Atomic Number | Atomic Type | Coordinates (Angstroms) |           |           |
|---------------|---------------|-------------|-------------------------|-----------|-----------|
|               |               |             | X                       | Y         | Z         |
| 1             | 6             | 0           | 5.498796                | -0.264619 | 0.181387  |
| 2             | 1             | 0           | 5.218478                | -1.312007 | 0.251807  |
| 3             | 1             | 0           | 6.530839                | -0.098770 | -0.118338 |
| 4             | 6             | 0           | 4.899315                | 0.680638  | 1.008108  |
| 5             | 1             | 0           | 5.390807                | 1.646500  | 1.102583  |
| 6             | 6             | 0           | 2.878223                | -0.586312 | 1.467143  |
| 7             | 1             | 0           | 3.407840                | -1.507666 | 1.250463  |
| 8             | 1             | 0           | 0.873755                | -0.000376 | 1.768861  |
| 9             | 7             | 0           | 1.565859                | -0.787265 | 1.736408  |
| 10            | 6             | 0           | 1.078622                | -2.092819 | 1.739596  |
| 11            | 8             | 0           | -0.252414               | -2.088248 | 1.910279  |
| 12            | 8             | 0           | 1.764793                | -3.088945 | 1.599859  |
| 13            | 1             | 0           | 0.583090                | -0.785425 | -1.298731 |
| 14            | 6             | 0           | -1.007195               | -5.244370 | -1.461123 |
| 15            | 6             | 0           | 0.374359                | -5.279964 | -1.518492 |
| 16            | 6             | 0           | 1.120063                | -4.081674 | -1.511372 |
| 17            | 6             | 0           | 0.425629                | -2.846557 | -1.429808 |
| 18            | 6             | 0           | -0.982702               | -2.811378 | -1.375083 |
| 19            | 6             | 0           | -1.680219               | -4.005466 | -1.394911 |
| 20            | 1             | 0           | 3.097720                | -4.965417 | -1.655991 |
| 21            | 1             | 0           | -1.576453               | -6.169053 | -1.468992 |
| 22            | 1             | 0           | 0.903953                | -6.227495 | -1.573119 |
| 23            | 6             | 0           | 2.545247                | -4.031360 | -1.594277 |
| 24            | 1             | 0           | -1.491252               | -1.857416 | -1.300222 |
| 25            | 1             | 0           | -2.765282               | -3.984506 | -1.349905 |

|    |    |   |           |           |           |
|----|----|---|-----------|-----------|-----------|
| 26 | 6  | 0 | 2.495622  | -1.601992 | -1.490149 |
| 27 | 6  | 0 | 3.209950  | -2.840437 | -1.599144 |
| 28 | 1  | 0 | 4.291053  | -2.813505 | -1.663425 |
| 29 | 7  | 0 | 1.144281  | -1.675717 | -1.400836 |
| 30 | 6  | 0 | 3.097332  | -0.317411 | -1.457844 |
| 31 | 1  | 0 | 2.427714  | 0.519830  | -1.296459 |
| 32 | 6  | 0 | 4.457143  | -0.057318 | -1.637635 |
| 33 | 1  | 0 | 5.095412  | -0.791773 | -2.122364 |
| 34 | 1  | 0 | 4.738733  | 0.970925  | -1.836974 |
| 35 | 6  | 0 | -0.867697 | -3.386999 | 1.984835  |
| 36 | 1  | 0 | -0.689333 | -3.823035 | 2.972724  |
| 37 | 1  | 0 | -1.930821 | -3.209720 | 1.828057  |
| 38 | 1  | 0 | -0.472750 | -4.049240 | 1.214276  |
| 39 | 6  | 0 | -4.355567 | 1.431409  | -0.657835 |
| 40 | 6  | 0 | -5.432075 | 1.475216  | -1.557764 |
| 41 | 6  | 0 | -5.330394 | 2.137325  | -2.779649 |
| 42 | 6  | 0 | -4.135539 | 2.771005  | -3.130204 |
| 43 | 6  | 0 | -3.051593 | 2.742892  | -2.254491 |
| 44 | 6  | 0 | -3.164938 | 2.086137  | -1.030956 |
| 45 | 6  | 0 | -4.468708 | 0.745968  | 0.649295  |
| 46 | 6  | 0 | -5.610022 | 0.881643  | 1.455037  |
| 47 | 6  | 0 | -5.694123 | 0.261297  | 2.700455  |
| 48 | 6  | 0 | -4.620233 | -0.495148 | 3.176811  |
| 49 | 6  | 0 | -3.477110 | -0.649556 | 2.393717  |
| 50 | 6  | 0 | -3.419469 | -0.055178 | 1.135289  |
| 51 | 1  | 0 | -6.353181 | 0.962999  | -1.292783 |
| 52 | 1  | 0 | -6.177469 | 2.150730  | -3.459854 |
| 53 | 1  | 0 | -4.046101 | 3.284310  | -4.083734 |
| 54 | 1  | 0 | -2.111098 | 3.229139  | -2.491264 |
| 55 | 1  | 0 | -6.425608 | 1.507987  | 1.104032  |
| 56 | 1  | 0 | -6.585487 | 0.388942  | 3.308328  |
| 57 | 1  | 0 | -4.667769 | -0.956021 | 4.159725  |
| 58 | 1  | 0 | -2.611654 | -1.202003 | 2.740686  |
| 59 | 8  | 0 | -2.105742 | 2.163159  | -0.143597 |
| 60 | 8  | 0 | -2.330973 | -0.316447 | 0.320343  |
| 61 | 15 | 0 | -1.159391 | 0.844112  | 0.134897  |
| 62 | 8  | 0 | -0.411678 | 0.463543  | -1.125071 |
| 63 | 8  | 0 | -0.413248 | 1.084346  | 1.412930  |
| 64 | 6  | 0 | 3.590179  | 0.600017  | 1.542235  |
| 65 | 16 | 0 | 2.855714  | 2.081117  | 2.248084  |
| 66 | 6  | 0 | 2.859719  | 3.145211  | 0.792626  |
| 67 | 6  | 0 | 3.783820  | 4.191343  | 0.691707  |
| 68 | 6  | 0 | 1.939144  | 2.920260  | -0.238486 |
| 69 | 6  | 0 | 3.795790  | 4.999746  | -0.448243 |
| 70 | 1  | 0 | 4.488255  | 4.367654  | 1.499551  |
| 71 | 6  | 0 | 1.968604  | 3.719460  | -1.380823 |
| 72 | 1  | 0 | 1.206261  | 2.130834  | -0.140488 |
| 73 | 6  | 0 | 2.895634  | 4.760069  | -1.488441 |
| 74 | 1  | 0 | 4.513502  | 5.812569  | -0.523796 |
| 75 | 1  | 0 | 1.253938  | 3.529813  | -2.177202 |
| 76 | 1  | 0 | 2.911836  | 5.386803  | -2.376245 |

-----  
***TS<sub>Sph</sub>-Tc(S-ex)***

B3LYP-D3/6-31g(d) in gas phase

SCF Done: E(RB3LYP) = -2652.965521 hartree

Sum of electronic and thermal Free Energies = -2652.445256

hartree  
 The number of imaginary frequency = 1  
 Imaginary frequency = -350.96

| Center Number | Atomic Number | Atomic Type | Coordinates (Angstroms) |           |           |
|---------------|---------------|-------------|-------------------------|-----------|-----------|
|               |               |             | X                       | Y         | Z         |
| 1             | 6             | 0           | -3.794843               | 3.654420  | -0.415986 |
| 2             | 1             | 0           | -4.488324               | 2.881790  | -0.096938 |
| 3             | 1             | 0           | -4.269953               | 4.516280  | -0.878171 |
| 4             | 6             | 0           | -2.599783               | 3.856187  | 0.267809  |
| 5             | 1             | 0           | -2.077149               | 4.793520  | 0.091420  |
| 6             | 6             | 0           | -2.470405               | 1.640544  | 1.251335  |
| 7             | 1             | 0           | -3.543232               | 1.536716  | 1.134077  |
| 8             | 1             | 0           | -0.851959               | 0.391478  | 1.820828  |
| 9             | 7             | 0           | -1.892015               | 0.533669  | 1.770945  |
| 10            | 6             | 0           | -2.698694               | -0.556585 | 2.094773  |
| 11            | 8             | 0           | -1.941007               | -1.565388 | 2.543870  |
| 12            | 8             | 0           | -3.911186               | -0.583587 | 1.980984  |
| 13            | 1             | 0           | -1.238419               | -0.665547 | -0.942350 |
| 14            | 6             | 0           | -3.461915               | -4.786035 | -0.131312 |
| 15            | 6             | 0           | -4.412992               | -3.842464 | -0.477831 |
| 16            | 6             | 0           | -4.029587               | -2.518078 | -0.779039 |
| 17            | 6             | 0           | -2.653640               | -2.177554 | -0.717210 |
| 18            | 6             | 0           | -1.687024               | -3.136385 | -0.349732 |
| 19            | 6             | 0           | -2.098438               | -4.426254 | -0.067091 |
| 20            | 1             | 0           | -6.006025               | -1.720539 | -1.196547 |
| 21            | 1             | 0           | -3.762962               | -5.803896 | 0.097448  |
| 22            | 1             | 0           | -5.466176               | -4.107263 | -0.522755 |
| 23            | 6             | 0           | -4.945840               | -1.485114 | -1.152177 |
| 24            | 1             | 0           | -0.643865               | -2.846220 | -0.281418 |
| 25            | 1             | 0           | -1.358510               | -5.168796 | 0.217344  |
| 26            | 6             | 0           | -3.115412               | 0.098401  | -1.385747 |
| 27            | 6             | 0           | -4.510780               | -0.227106 | -1.448717 |
| 28            | 1             | 0           | -5.213958               | 0.546937  | -1.732113 |
| 29            | 7             | 0           | -2.270009               | -0.894141 | -1.009666 |
| 30            | 6             | 0           | -2.543881               | 1.359729  | -1.693214 |
| 31            | 1             | 0           | -1.466009               | 1.420593  | -1.591336 |
| 32            | 6             | 0           | -3.234552               | 2.498759  | -2.104558 |
| 33            | 1             | 0           | -4.259135               | 2.424897  | -2.460437 |
| 34            | 1             | 0           | -2.656685               | 3.283911  | -2.579430 |
| 35            | 6             | 0           | -2.669482               | -2.725196 | 2.977783  |
| 36            | 1             | 0           | -3.317567               | -3.096336 | 2.181964  |
| 37            | 1             | 0           | -1.906766               | -3.462587 | 3.226652  |
| 38            | 1             | 0           | -3.273712               | -2.483485 | 3.857304  |
| 39            | 6             | 0           | 4.033794                | -2.022696 | -0.612331 |
| 40            | 6             | 0           | 4.931347                | -2.572991 | -1.541634 |
| 41            | 6             | 0           | 4.522576                | -3.518558 | -2.479775 |
| 42            | 6             | 0           | 3.189010                | -3.931983 | -2.512431 |
| 43            | 6             | 0           | 2.276897                | -3.400845 | -1.602437 |
| 44            | 6             | 0           | 2.695823                | -2.461933 | -0.660716 |
| 45            | 6             | 0           | 4.488869                | -1.023585 | 0.382103  |
| 46            | 6             | 0           | 5.708736                | -1.170604 | 1.061876  |
| 47            | 6             | 0           | 6.145739                | -0.216658 | 1.978766  |
| 48            | 6             | 0           | 5.362647                | 0.911032  | 2.239946  |
| 49            | 6             | 0           | 4.146955                | 1.080496  | 1.579950  |
| 50            | 6             | 0           | 3.724587                | 0.123733  | 0.660557  |

|    |    |   |           |           |           |
|----|----|---|-----------|-----------|-----------|
| 51 | 1  | 0 | 5.962434  | -2.230523 | -1.532130 |
| 52 | 1  | 0 | 5.239348  | -3.921453 | -3.189828 |
| 53 | 1  | 0 | 2.857674  | -4.662861 | -3.245107 |
| 54 | 1  | 0 | 1.235600  | -3.706760 | -1.601966 |
| 55 | 1  | 0 | 6.306016  | -2.059252 | 0.876729  |
| 56 | 1  | 0 | 7.090228  | -0.358466 | 2.496682  |
| 57 | 1  | 0 | 5.694680  | 1.654595  | 2.959246  |
| 58 | 1  | 0 | 3.511866  | 1.942706  | 1.753828  |
| 59 | 8  | 0 | 1.784975  | -2.044369 | 0.292830  |
| 60 | 8  | 0 | 2.561451  | 0.358190  | -0.051872 |
| 61 | 15 | 0 | 1.200632  | -0.492769 | 0.309553  |
| 62 | 8  | 0 | 0.295959  | -0.275773 | -0.886260 |
| 63 | 8  | 0 | 0.708571  | -0.236871 | 1.701328  |
| 64 | 6  | 0 | -1.878701 | 2.863351  | 0.974632  |
| 65 | 16 | 0 | -0.187243 | 3.182877  | 1.492508  |
| 66 | 6  | 0 | 0.518320  | 3.887504  | -0.007304 |
| 67 | 6  | 0 | 0.753045  | 5.266990  | -0.071468 |
| 68 | 6  | 0 | 0.862555  | 3.064650  | -1.088563 |
| 69 | 6  | 0 | 1.316554  | 5.825560  | -1.221028 |
| 70 | 1  | 0 | 0.493523  | 5.895275  | 0.775715  |
| 71 | 6  | 0 | 1.414194  | 3.633757  | -2.236992 |
| 72 | 1  | 0 | 0.719311  | 1.991923  | -1.029702 |
| 73 | 6  | 0 | 1.641304  | 5.010728  | -2.307057 |
| 74 | 1  | 0 | 1.497767  | 6.896265  | -1.266659 |
| 75 | 1  | 0 | 1.682059  | 2.990889  | -3.071030 |
| 76 | 1  | 0 | 2.078505  | 5.446119  | -3.201788 |

***TS<sub>SPH</sub>-Ti(R-ex)***

B3LYP-D3/6-31g(d) in gas phase

SCF Done: E(RB3LYP) = -2652.964546 hartree

Sum of electronic and thermal Free Energies = -2652.441962 hartree

The number of imaginary frequency = 1

Imaginary frequency = -358.19

| Center Number | Atomic Number | Atomic Type | Coordinates (Angstroms) |           |           |
|---------------|---------------|-------------|-------------------------|-----------|-----------|
|               |               |             | X                       | Y         | Z         |
| 1             | 6             | 0           | -5.153116               | 1.863456  | -0.063051 |
| 2             | 1             | 0           | -5.278538               | 0.784180  | -0.064870 |
| 3             | 1             | 0           | -6.044450               | 2.411394  | 0.234025  |
| 4             | 6             | 0           | -4.282338               | 2.474845  | -0.963961 |
| 5             | 1             | 0           | -4.409869               | 3.539904  | -1.141979 |
| 6             | 6             | 0           | -2.897935               | 0.523874  | -1.410495 |
| 7             | 1             | 0           | -3.731913               | -0.110706 | -1.136536 |
| 8             | 1             | 0           | -0.838009               | 0.336089  | -1.830317 |
| 9             | 7             | 0           | -1.768888               | -0.147970 | -1.725544 |
| 10            | 6             | 0           | -1.672201               | -1.535660 | -1.779240 |
| 11            | 8             | 0           | -2.865006               | -2.140635 | -1.564850 |
| 12            | 8             | 0           | -0.636923               | -2.126747 | -1.996475 |
| 13            | 1             | 0           | -0.846201               | -0.499086 | 1.168697  |
| 14            | 6             | 0           | -1.266536               | -5.243246 | 1.475972  |
| 15            | 6             | 0           | -2.501650               | -4.680703 | 1.741575  |
| 16            | 6             | 0           | -2.668919               | -3.279676 | 1.706209  |
| 17            | 6             | 0           | -1.546581               | -2.461397 | 1.405085  |
| 18            | 6             | 0           | -0.290700               | -3.038469 | 1.127064  |

|    |    |   |           |           |           |
|----|----|---|-----------|-----------|-----------|
| 19 | 6  | 0 | -0.166086 | -4.415807 | 1.164910  |
| 20 | 1  | 0 | -4.791379 | -3.230837 | 2.161820  |
| 21 | 1  | 0 | -1.141880 | -6.321651 | 1.500929  |
| 22 | 1  | 0 | -3.359518 | -5.306395 | 1.974783  |
| 23 | 6  | 0 | -3.917303 | -2.624743 | 1.935757  |
| 24 | 1  | 0 | 0.549823  | -2.403137 | 0.868994  |
| 25 | 1  | 0 | 0.797923  | -4.863867 | 0.943059  |
| 26 | 6  | 0 | -2.877247 | -0.452684 | 1.582143  |
| 27 | 6  | 0 | -4.023469 | -1.266321 | 1.872054  |
| 28 | 1  | 0 | -4.977212 | -0.782772 | 2.044538  |
| 29 | 7  | 0 | -1.703093 | -1.097265 | 1.365028  |
| 30 | 6  | 0 | -2.892714 | 0.964153  | 1.496620  |
| 31 | 1  | 0 | -1.952223 | 1.444045  | 1.242670  |
| 32 | 6  | 0 | -4.026301 | 1.752740  | 1.709967  |
| 33 | 1  | 0 | -4.873147 | 1.359953  | 2.266916  |
| 34 | 1  | 0 | -3.869229 | 2.815906  | 1.853124  |
| 35 | 6  | 0 | -2.839815 | -3.573001 | -1.702910 |
| 36 | 1  | 0 | -2.078463 | -4.010489 | -1.055917 |
| 37 | 1  | 0 | -3.834438 | -3.906815 | -1.406513 |
| 38 | 1  | 0 | -2.636003 | -3.846181 | -2.742129 |
| 39 | 6  | 0 | 4.334738  | -0.864431 | -0.543446 |
| 40 | 6  | 0 | 5.442668  | -1.266201 | -1.306611 |
| 41 | 6  | 0 | 5.292034  | -2.100900 | -2.412742 |
| 42 | 6  | 0 | 4.020501  | -2.545617 | -2.787071 |
| 43 | 6  | 0 | 2.902267  | -2.163187 | -2.047516 |
| 44 | 6  | 0 | 3.071602  | -1.342625 | -0.935491 |
| 45 | 6  | 0 | 4.479749  | 0.013677  | 0.641173  |
| 46 | 6  | 0 | 5.521089  | -0.178303 | 1.563532  |
| 47 | 6  | 0 | 5.663374  | 0.639978  | 2.682635  |
| 48 | 6  | 0 | 4.750473  | 1.672766  | 2.910378  |
| 49 | 6  | 0 | 3.707261  | 1.886578  | 2.011219  |
| 50 | 6  | 0 | 3.582381  | 1.072257  | 0.887118  |
| 51 | 1  | 0 | 6.427661  | -0.896163 | -1.035014 |
| 52 | 1  | 0 | 6.164499  | -2.390754 | -2.991968 |
| 53 | 1  | 0 | 3.898910  | -3.183419 | -3.658506 |
| 54 | 1  | 0 | 1.894627  | -2.471621 | -2.306165 |
| 55 | 1  | 0 | 6.213708  | -0.999828 | 1.401513  |
| 56 | 1  | 0 | 6.476283  | 0.463298  | 3.381547  |
| 57 | 1  | 0 | 4.847898  | 2.308359  | 3.786402  |
| 58 | 1  | 0 | 2.978472  | 2.678070  | 2.152395  |
| 59 | 8  | 0 | 1.968499  | -1.051083 | -0.151996 |
| 60 | 8  | 0 | 2.608094  | 1.393404  | -0.039654 |
| 61 | 15 | 0 | 1.275314  | 0.451280  | -0.253185 |
| 62 | 8  | 0 | 0.770536  | 0.741254  | -1.636930 |
| 63 | 8  | 0 | 0.350488  | 0.513001  | 0.940994  |
| 64 | 6  | 0 | -3.108560 | 1.894850  | -1.503005 |
| 65 | 16 | 0 | -1.894514 | 2.962444  | -2.285270 |
| 66 | 6  | 0 | -0.976269 | 3.640043  | -0.885821 |
| 67 | 6  | 0 | 0.417558  | 3.682433  | -0.987931 |
| 68 | 6  | 0 | -1.608057 | 4.162874  | 0.249780  |
| 69 | 6  | 0 | 1.172244  | 4.232268  | 0.050513  |
| 70 | 1  | 0 | 0.909898  | 3.234744  | -1.842467 |
| 71 | 6  | 0 | -0.845766 | 4.687771  | 1.292651  |
| 72 | 1  | 0 | -2.690356 | 4.162093  | 0.320677  |
| 73 | 6  | 0 | 0.547409  | 4.727003  | 1.194681  |
| 74 | 1  | 0 | 2.254740  | 4.232424  | -0.028001 |
| 75 | 1  | 0 | -1.343151 | 5.077515  | 2.177392  |

76 1 0 1.139706 5.138987 2.007454

-----  
***TS<sub>SPH</sub>-Tt(S-ex)***

B3LYP-D3/6-31g(d) in gas phase

SCF Done: E(RB3LYP) = -2652.958291 hartree

Sum of electronic and thermal Free Energies = -2652.437919 hartree

The number of imaginary frequency = 1

Imaginary frequency = -351.89

-----

| Center Number | Atomic Number | Atomic Type | Coordinates (Angstroms) |           |           |
|---------------|---------------|-------------|-------------------------|-----------|-----------|
|               |               |             | X                       | Y         | Z         |
| 1             | 6             | 0           | 2.107205                | 1.711784  | 3.743691  |
| 2             | 1             | 0           | 2.899902                | 1.056676  | 3.394245  |
| 3             | 1             | 0           | 2.203117                | 2.019055  | 4.782131  |
| 4             | 6             | 0           | 1.464490                | 2.571960  | 2.862858  |
| 5             | 1             | 0           | 0.898471                | 3.397791  | 3.290127  |
| 6             | 6             | 0           | 1.992135                | 1.350984  | 0.817792  |
| 7             | 1             | 0           | 2.883353                | 0.945782  | 1.280737  |
| 8             | 1             | 0           | 0.798920                | 1.000079  | -0.869161 |
| 9             | 7             | 0           | 1.742964                | 0.887023  | -0.432275 |
| 10            | 6             | 0           | 2.620557                | 0.104269  | -1.172354 |
| 11            | 8             | 0           | 3.798812                | -0.077727 | -0.524278 |
| 12            | 8             | 0           | 2.359328                | -0.349263 | -2.263749 |
| 13            | 1             | 0           | 0.567123                | -1.800099 | 0.332092  |
| 14            | 6             | 0           | 4.107497                | -4.608934 | -1.070240 |
| 15            | 6             | 0           | 4.418684                | -4.136147 | 0.191306  |
| 16            | 6             | 0           | 3.538795                | -3.256602 | 0.858605  |
| 17            | 6             | 0           | 2.332437                | -2.874837 | 0.213166  |
| 18            | 6             | 0           | 2.022809                | -3.348929 | -1.078963 |
| 19            | 6             | 0           | 2.909361                | -4.208662 | -1.701735 |
| 20            | 1             | 0           | 4.707204                | -2.984496 | 2.668357  |
| 21            | 1             | 0           | 4.786441                | -5.285179 | -1.581002 |
| 22            | 1             | 0           | 5.341309                | -4.431577 | 0.684397  |
| 23            | 6             | 0           | 3.789733                | -2.709834 | 2.153470  |
| 24            | 1             | 0           | 1.106039                | -3.016220 | -1.553704 |
| 25            | 1             | 0           | 2.681080                | -4.574738 | -2.698288 |
| 26            | 6             | 0           | 1.686693                | -1.485602 | 2.078238  |
| 27            | 6             | 0           | 2.902545                | -1.856376 | 2.743186  |
| 28            | 1             | 0           | 3.106761                | -1.446804 | 3.724814  |
| 29            | 7             | 0           | 1.469387                | -2.019414 | 0.852835  |
| 30            | 6             | 0           | 0.720333                | -0.585534 | 2.607906  |
| 31            | 1             | 0           | -0.134408               | -0.357959 | 1.979257  |
| 32            | 6             | 0           | 0.801406                | 0.005304  | 3.865323  |
| 33            | 1             | 0           | 1.424871                | -0.423527 | 4.644908  |
| 34            | 1             | 0           | -0.076488               | 0.522419  | 4.236081  |
| 35            | 6             | 0           | 4.788491                | -0.795730 | -1.280712 |
| 36            | 1             | 0           | 5.638942                | -0.907743 | -0.607452 |
| 37            | 1             | 0           | 4.409717                | -1.771868 | -1.586566 |
| 38            | 1             | 0           | 5.073121                | -0.222867 | -2.167812 |
| 39            | 6             | 0           | -4.564423               | 0.068369  | 0.402256  |
| 40            | 6             | 0           | -5.703671               | 0.843443  | 0.674654  |
| 41            | 6             | 0           | -5.612779               | 2.062203  | 1.343469  |
| 42            | 6             | 0           | -4.365186               | 2.536490  | 1.755608  |
| 43            | 6             | 0           | -3.218776               | 1.788911  | 1.494611  |

|    |   |   |           |           |           |    |    |   |           |           |           |
|----|---|---|-----------|-----------|-----------|----|----|---|-----------|-----------|-----------|
| 44 | 6 | 0 | -3.318273 | 0.571555  | 0.823787  | 61 | 15 | 0 | -1.484698 | -0.450349 | -0.820527 |
| 45 | 6 | 0 | -4.680701 | -1.242613 | -0.276842 | 62 | 8  | 0 | -0.845318 | 0.797641  | -1.353700 |
| 46 | 6 | 0 | -5.703088 | -2.144872 | 0.060247  | 63 | 8  | 0 | -0.678245 | -1.713738 | -0.623899 |
| 47 | 6 | 0 | -5.826123 | -3.375861 | -0.580507 | 64 | 6  | 0 | 1.302561  | 2.366496  | 1.469950  |
| 48 | 6 | 0 | -4.915689 | -3.736099 | -1.577278 | 65 | 16 | 0 | 0.083328  | 3.388136  | 0.648009  |
| 49 | 6 | 0 | -3.890983 | -2.859948 | -1.929767 | 66 | 6  | 0 | 0.946944  | 3.865897  | -0.856392 |
| 50 | 6 | 0 | -3.782872 | -1.627707 | -1.288989 | 67 | 6  | 0 | 0.380211  | 3.546782  | -2.094773 |
| 51 | 1 | 0 | -6.670809 | 0.482414  | 0.335730  | 68 | 6  | 0 | 2.153219  | 4.575290  | -0.789363 |
| 52 | 1 | 0 | -6.510753 | 2.643672  | 1.532910  | 69 | 6  | 0 | 1.026266  | 3.948213  | -3.266975 |
| 53 | 1 | 0 | -4.281954 | 3.488612  | 2.272599  | 70 | 1  | 0 | -0.523046 | 2.948208  | -2.133437 |
| 54 | 1 | 0 | -2.235580 | 2.129751  | 1.796422  | 71 | 6  | 0 | 2.797672  | 4.955369  | -1.965188 |
| 55 | 1 | 0 | -6.394911 | -1.875208 | 0.853520  | 72 | 1  | 0 | 2.582648  | 4.818116  | 0.178359  |
| 56 | 1 | 0 | -6.623445 | -4.056479 | -0.295006 | 73 | 6  | 0 | 2.231941  | 4.647335  | -3.206341 |
| 57 | 1 | 0 | -5.000664 | -4.697137 | -2.077177 | 74 | 1  | 0 | 0.591629  | 3.691007  | -4.228917 |
| 58 | 1 | 0 | -3.168069 | -3.103150 | -2.701133 | 75 | 1  | 0 | 3.736325  | 5.501220  | -1.913092 |
| 59 | 8 | 0 | -2.173709 | -0.188258 | 0.672260  | 76 | 1  | 0 | 2.734243  | 4.948461  | -4.121875 |
| 60 | 8 | 0 | -2.817977 | -0.739232 | -1.731440 |    |    |   |           |           |           |

---



## 5. Determination of relative configurations

The coupling constants of  $^1\text{H}$  NMR determined the relative configuration of **3ab** and **3ai**<sup>[6]</sup>. Quinoline moiety and amide group were in the opposite direction.

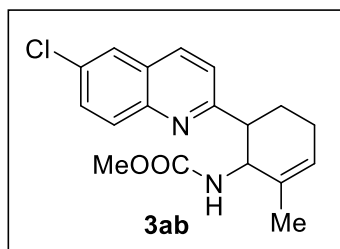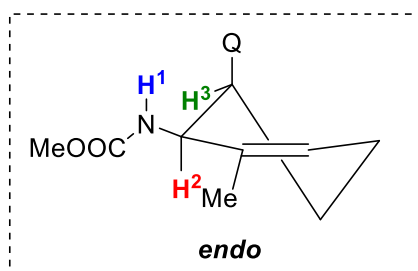

$\text{H}^1$  : 4.97 (d,  $J = 10.2$  Hz, 1H)  
 $\text{H}^2$  : 4.50 (dd,  $J = 10.2, 4.2$  Hz, 1H)  
 $\text{H}^3$  : 3.37 (ddd,  $J = 12.6, 4.2, 3.0$  Hz, 1H)

$$J(\text{H}^2/\text{H}^3) = 4.2 \text{ Hz}$$

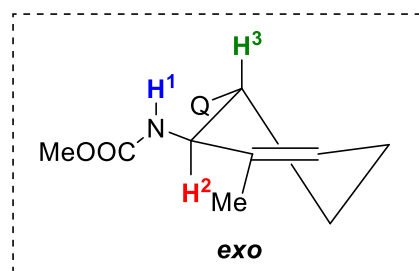

$\text{H}^1$  : 4.64 (d,  $J = 9.0$  Hz, 1H)  
 $\text{H}^2$  : 4.69 (dd,  $J = 9.0, 9.0$  Hz, 1H)  
 $\text{H}^3$  : 3.20 (ddd,  $J = 10.2, 9.0, 3.6$  Hz, 1H)

$$J(\text{H}^2/\text{H}^3) = 9.0 \text{ Hz}$$

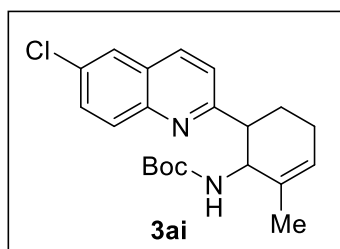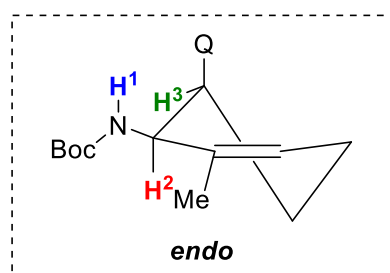

$\text{H}^1$  : 4.69 (d,  $J = 10.2$  Hz, 1H)  
 $\text{H}^2$  : 4.43 (dd,  $J = 10.2, 4.2$  Hz, 1H)  
 $\text{H}^3$  : 3.34 (ddd,  $J = 12.6, 4.2, 3.0$  Hz, 1H)

$$J(\text{H}^2/\text{H}^3) = 4.2 \text{ Hz}$$

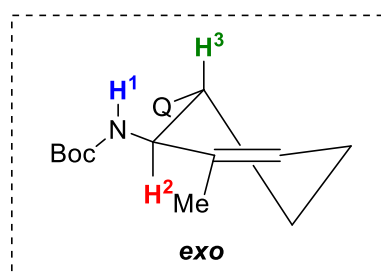

$\text{H}^1$  : 4.51 (d,  $J = 9.0$  Hz, 1H)  
 $\text{H}^2$  : 4.60 (dd,  $J = 9.0, 9.0$  Hz, 1H)  
 $\text{H}^3$  : 3.20 (ddd,  $J = 10.2, 9.0, 3.0$  Hz, 1H)

$$J(\text{H}^2/\text{H}^3) = 9.0 \text{ Hz}$$

## 6. Catalyst screening for enantioselective reaction

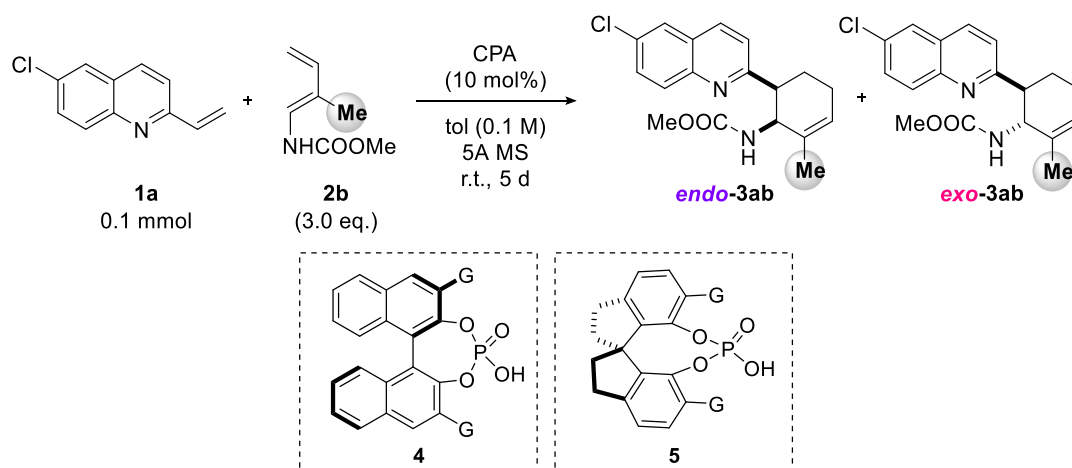

| Entry | CPA (G)                                                                                         | Yield (%) <sup>a</sup> | <i>endo/exo</i> <sup>b</sup> | Ee (%)       |
|-------|-------------------------------------------------------------------------------------------------|------------------------|------------------------------|--------------|
| 1     | ( <i>R</i> )- <b>4a</b> (G = H)                                                                 | 52                     | 15/85                        | 5/31         |
| 2     | ( <i>R</i> )- <b>4b</b> (G = Me)                                                                | 60                     | 16/84                        | rac/75       |
| 3     | ( <i>R</i> )- <b>4c</b> (G = 2,4,6-( <i>i</i> Pr) <sub>3</sub> -C <sub>6</sub> H <sub>2</sub> ) | 50                     | 17/83                        | 67/69        |
| 4     | ( <i>R</i> )- <b>4d</b> (G = Bn)                                                                | <b>90</b>              | <b>3/97</b>                  | <b>16/81</b> |
| 5     | ( <i>S</i> )- <b>5c</b> (G = 2,4,6-( <i>i</i> Pr) <sub>3</sub> -C <sub>6</sub> H <sub>2</sub> ) | trace                  | -                            | -            |

<sup>a</sup> Isolated yield. <sup>b</sup> Determined by <sup>1</sup>H NMR of crude materials.

## 7. References

- [1] Xiao, J.; Huang, Y.; Song, Z.; Feng, W. Facile catalyst-free synthesis of 2-vinylquinolines *via* a direct deamination reaction occurring during Mannich synthesis. *RSC Adv.* **2015**, *5*, 99095-99098.
- [2] Momiyama, N.; Tabuse, S.; Noda, H.; Yamanaka, M.; Fujinami, T.; Yamanishi, K.; Izumiseki, A.; Funayama, K.; Egawa, F.; Okada, S.; Adachi, H.; Terada, M. Molecular Design of a Chiral Brønsted Acid with Two Different Acidic Sites: Regio-, Diastereo-, and Enantioselective Hetero-Diels–Alder Reaction of Azopyridinecarboxylate with Amidodienes Catalyzed by Chiral Carboxylic Acid–Monophosphoric Acid. *J. Am. Chem. Soc.* **2016**, *138*, 11353-11359.
- [3] Gaussian 16, Revision C.01, Frisch, M. J.; Trucks, G. W.; Schlegel, H. B.; Scuseria, G. E.; Robb, M. A.; Cheeseman, J. R.; Scalmani, G.; Barone, V.; Petersson, G. A.; Nakatsuji, H.; Li, X.; Caricato, M.; Marenich, A. V.; Bloino, J.; Janesko, B. G.; Gomperts, R.; Mennucci, B.; Hratchian, H. P.; Ortiz, J. V.; Izmaylov, A. F.; Sonnenberg, J. L.; Williams-Young, D.; Ding, F.; Lipparini, F.; Egidi, F.; Goings, J.; Peng, B.; Petrone, A.; Henderson, T.; Ranasinghe, D.; Zakrzewski, V. G.; Gao, J.; Rega, N.; Zheng, G.; Liang, W.; Hada, M.; Ehara, M.; Toyota, K.; Fukuda, R.; Hasegawa, J.; Ishida, M.; Nakajima, T.; Honda, Y.; Kitao, O.; Nakai, H.; Vreven, T.; Throssell, K.; Montgomery, J. A., Jr.; Peralta, J. E.; Ogliaro, F.; Bearpark, M. J.; Heyd, J. J.; Brothers, E. N.; Kudin, K. N.; Staroverov, V. N.; Keith, T. A.; Kobayashi, R.; Normand, J.; Raghavachari, K.; Rendell, A. P.; Burant, J. C.; Iyengar, S. S.; Tomasi, J.; Cossi, M.; Millam, J. M.; Klene, M.; Adamo, C.; Cammi, R.; Ochterski, J. W.; Martin, R. L.; Morokuma, K.; Farkas, O.; Foresman, J. B.; Fox, D. J. Gaussian, Inc., Wallingford CT, 2016.
- [4] (a) Becke, A. D. Density-functional exchange-energy approximation with correct asymptotic behavior. *Phys. Rev. A* **1988**, *38*, 3098-3100. (b) Lee, C.; Yang, W. T.; Parr, R. G. Development of the Colle-Salvetti correlation-energy formula into a functional of the electron density. *Phys. Rev. B* **1988**, *37*, 785-789.
- [5] (a) Grimme, S.; Antony, J.; Ehrlich, S.; Krieg, H., A consistent and accurate ab initio parametrization of density functional dispersion correction (DFT-D) for the 94 elements H-Pu. *J. Chem. Phys.* **2010**, *132*, 154104. (b) Grimme, S.; Ehrlich, S.; Goerigk, L., Effect of the damping function in dispersion corrected density functional theory. *J. Comput. Chem.* **2011**, *32*, 1456–1465.
- [6] (a) Lam, Y.-H.; Cheong, P. H.-Y.; Mata, J. M. B.; Stanway, S. J.; Gouverneur, V.; Houk, K. N. Diels–Alder Exo Selectivity in Terminal-Substituted Dienes and Dienophiles: Experimental Discoveries and Computational Explanations. *J. Am. Chem. Soc.* **2009**, *131*, 1947-1957. (b) Liu, Z.; Lin, X.; Yang, N.; Su, Z.; Hu, C.; Xiao, P.; He, Y.; Song, Z. Unique Steric Effect of Geminal Bis(silane) To Control the High *Exo*-selectivity in Intermolecular Diels–Alder Reaction *J. Am. Chem. Soc.* **2016**, *138*, 1877-1883.

## 8. NMR spectra

$^1\text{H}$  and  $^{13}\text{C}$  NMR charts of **1a**.

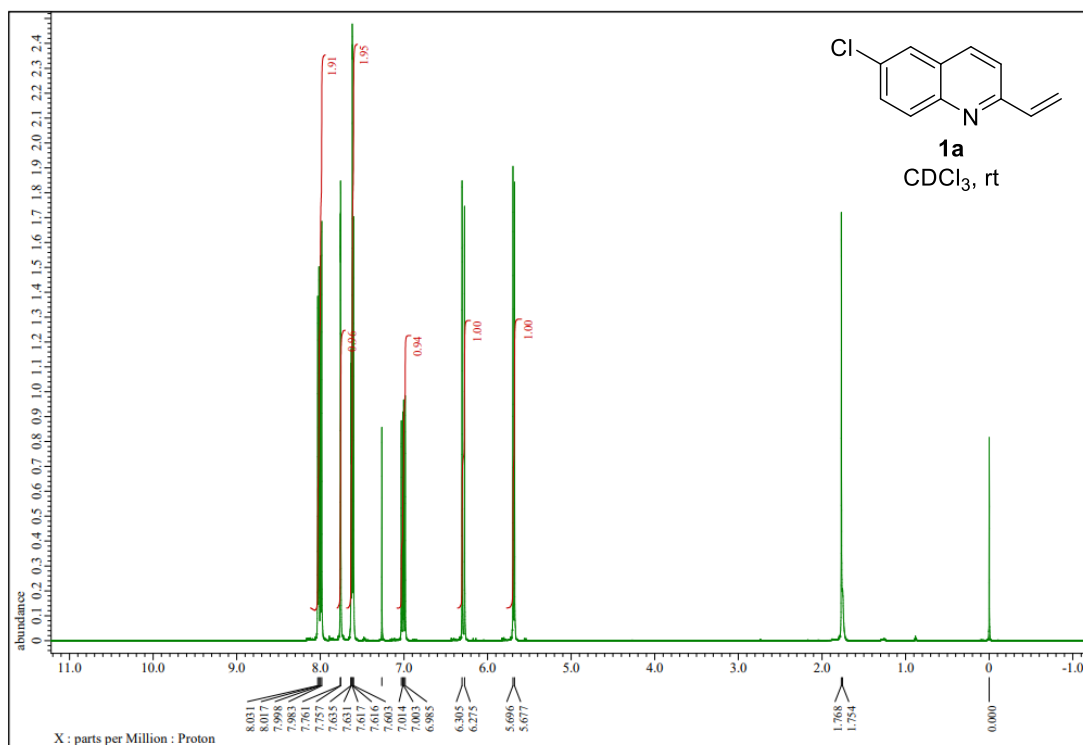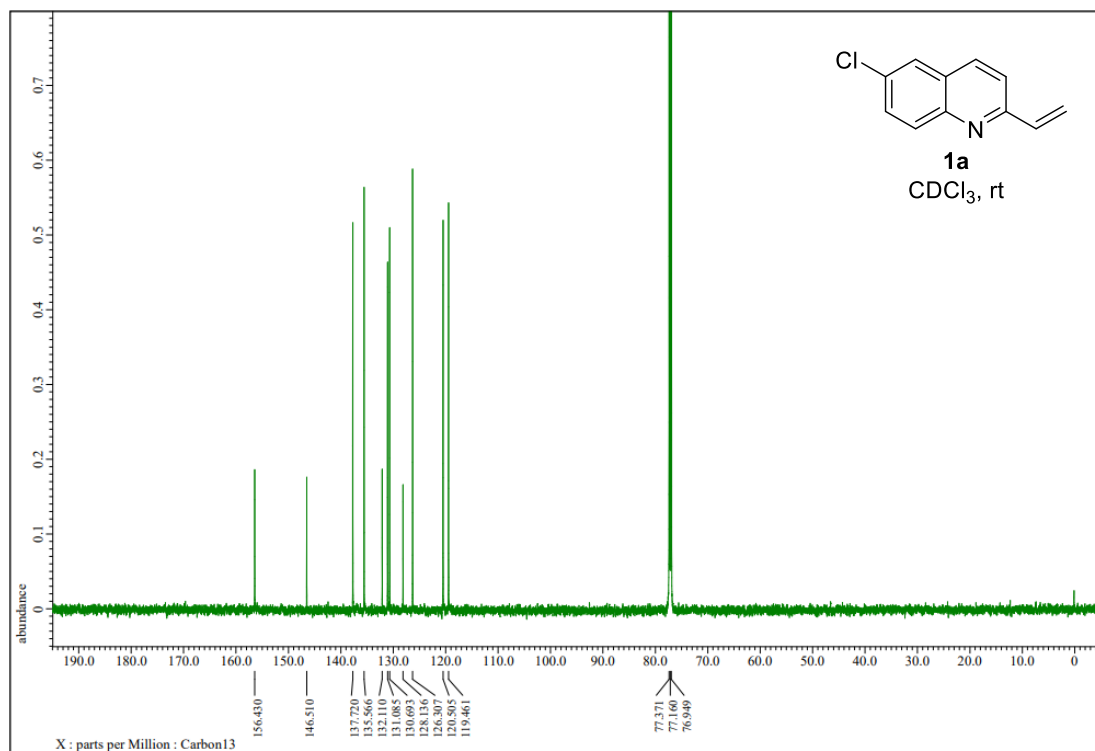

$^1\text{H}$  and  $^{13}\text{C}$  NMR charts of **2a**.

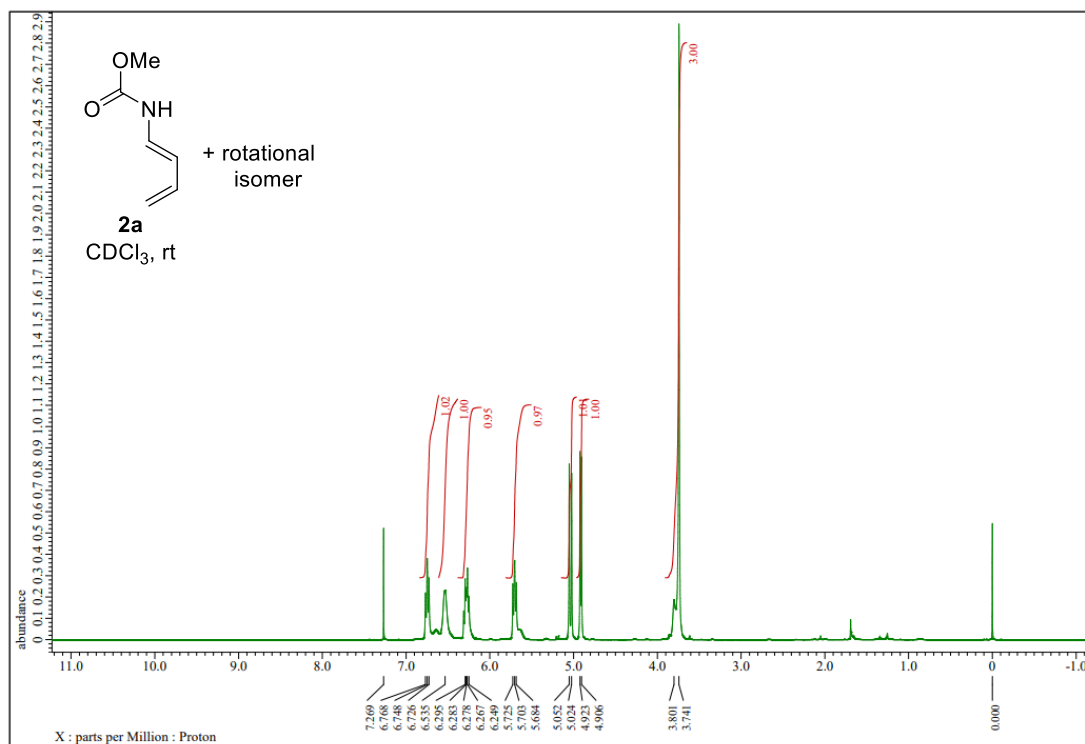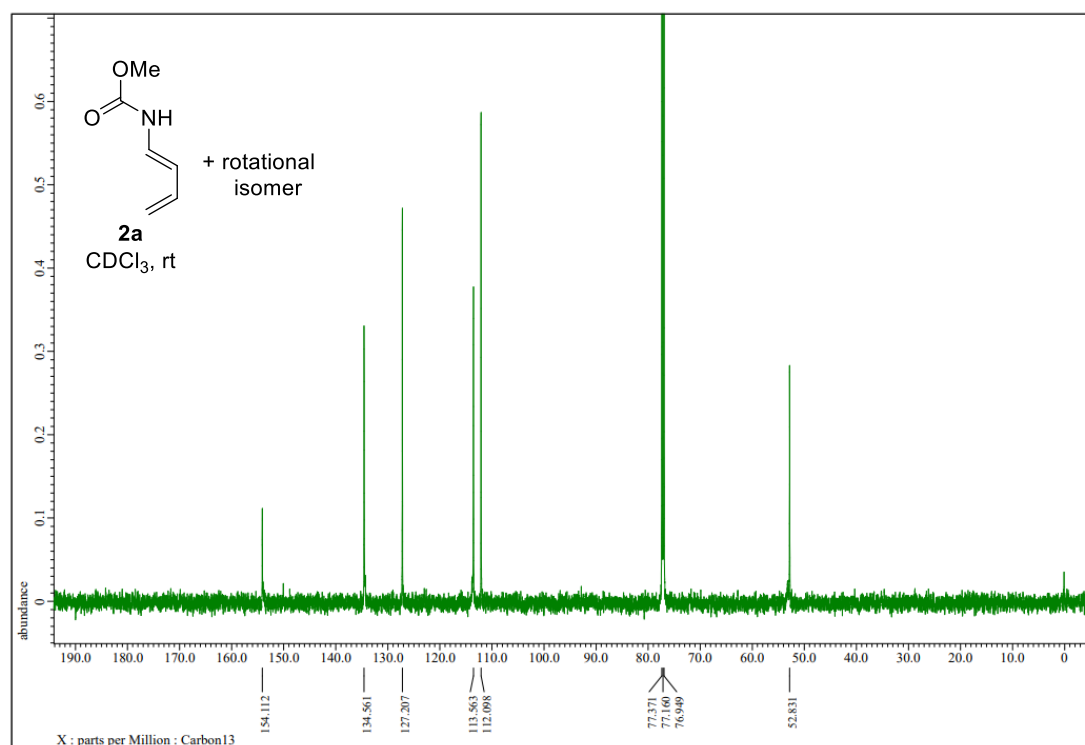

$^1\text{H}$  and  $^{13}\text{C}$  NMR charts of **2b**.

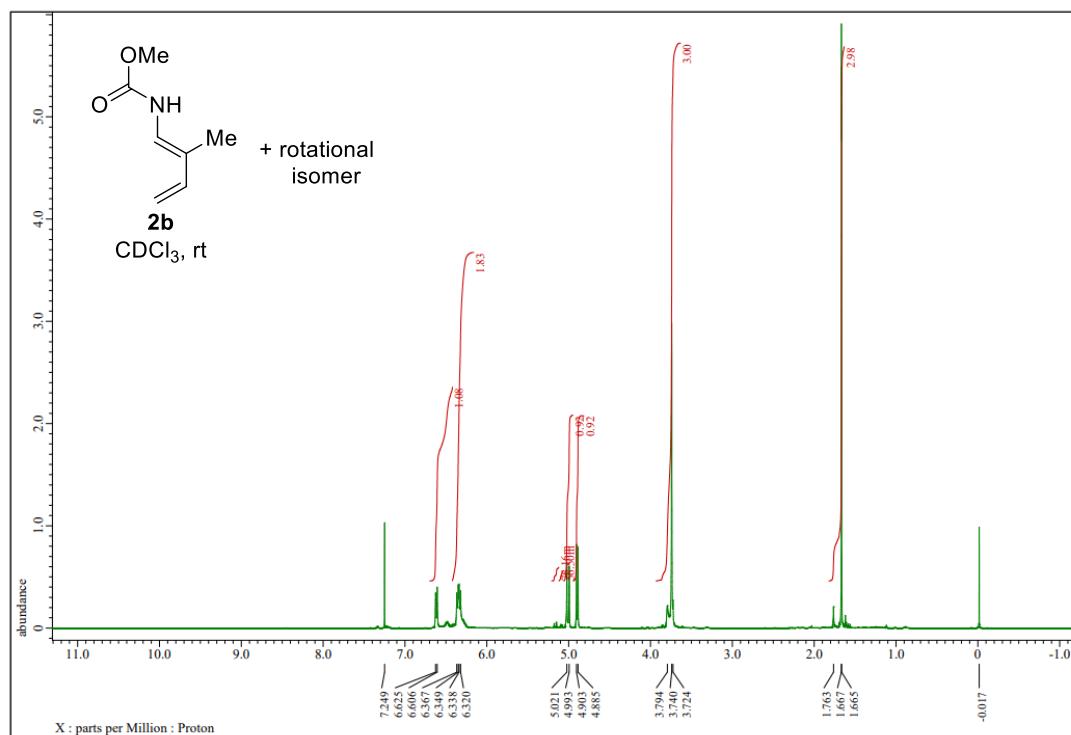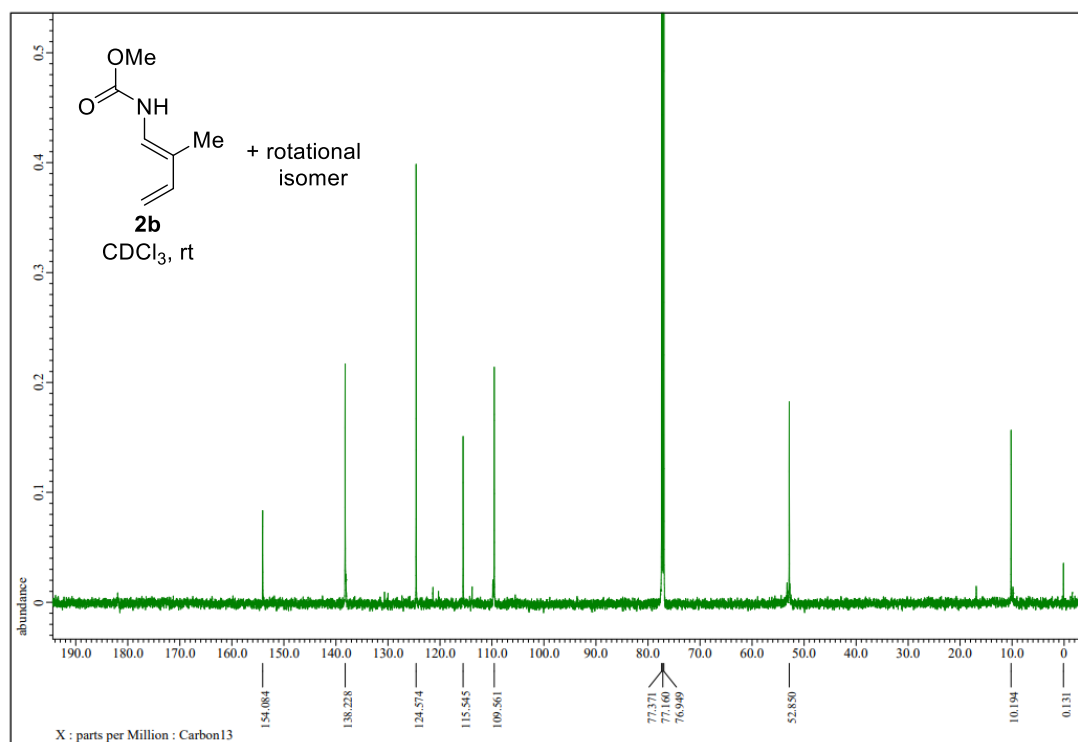

$^1\text{H}$  and  $^{13}\text{C}$  NMR charts of **2g**.

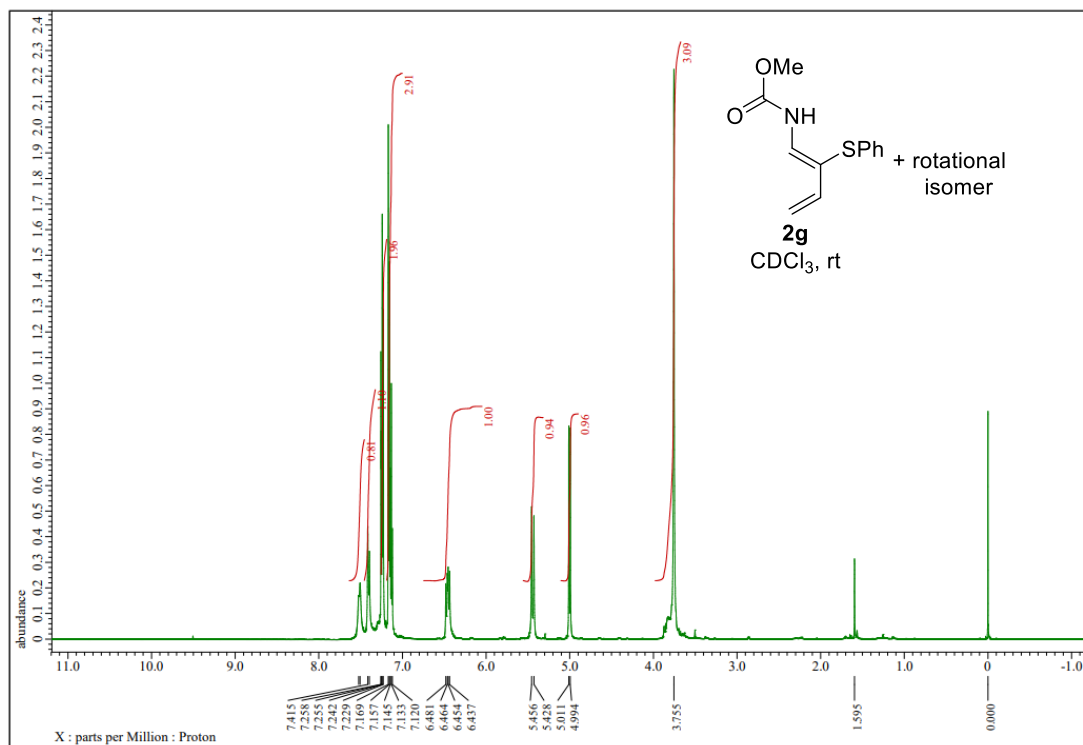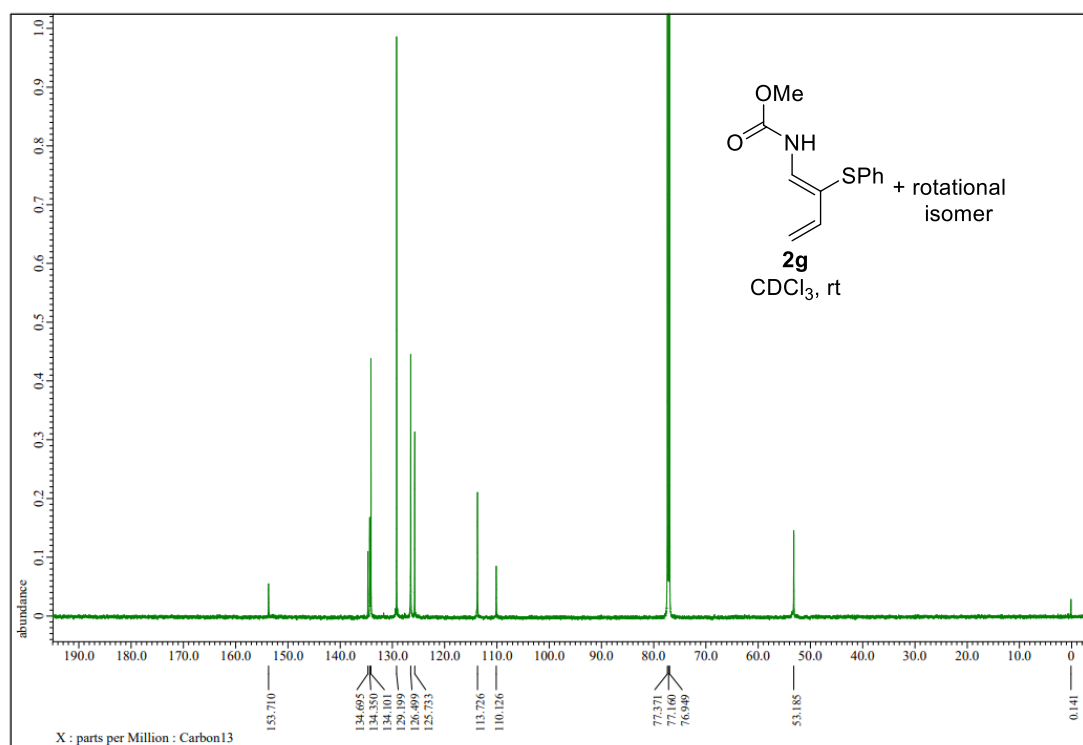

$^1\text{H}$  and  $^{13}\text{C}$  NMR charts of **2h**.

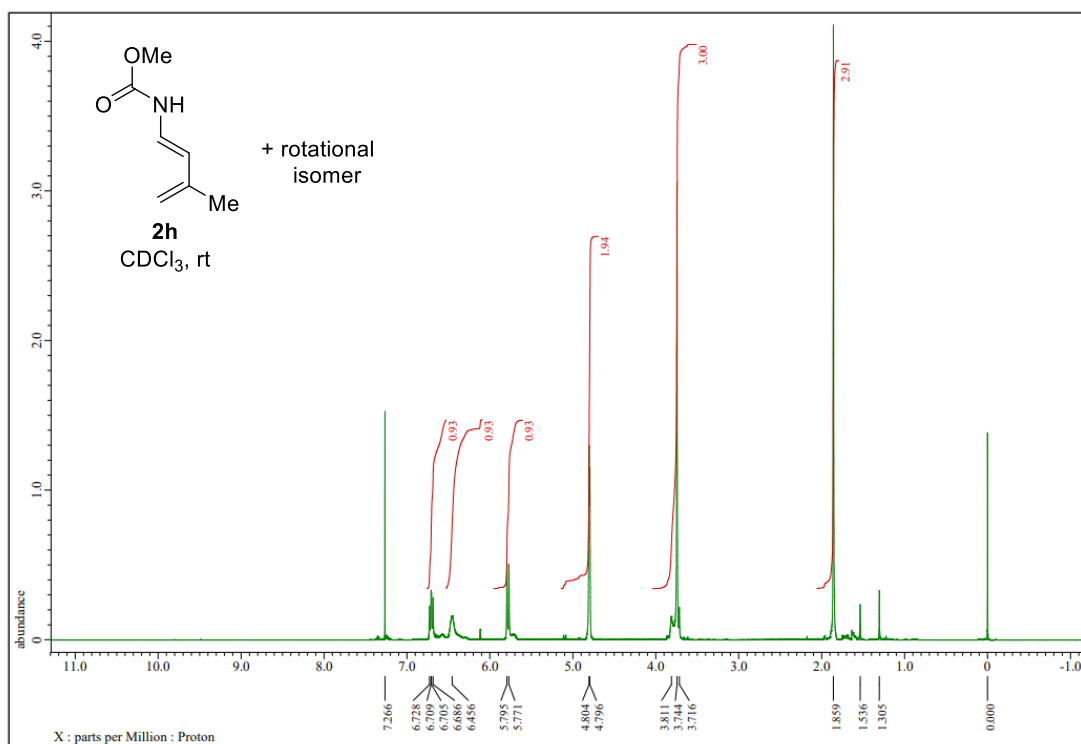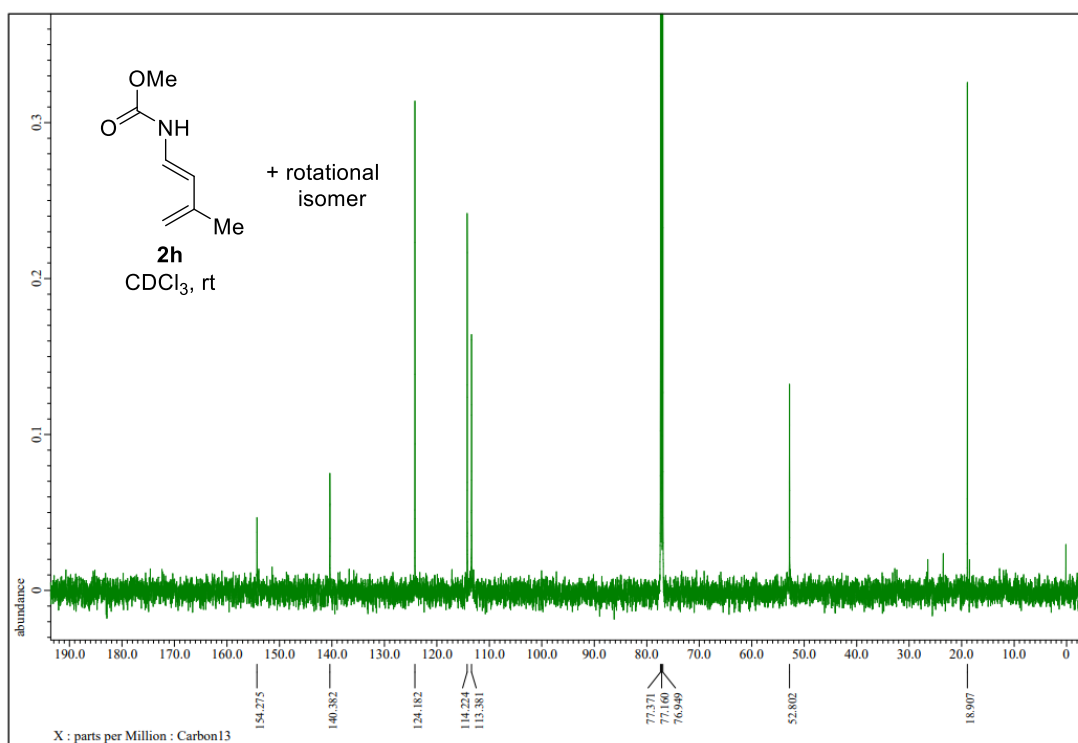



$^1\text{H}$  and  $^{13}\text{C}$  NMR charts of **2i**.

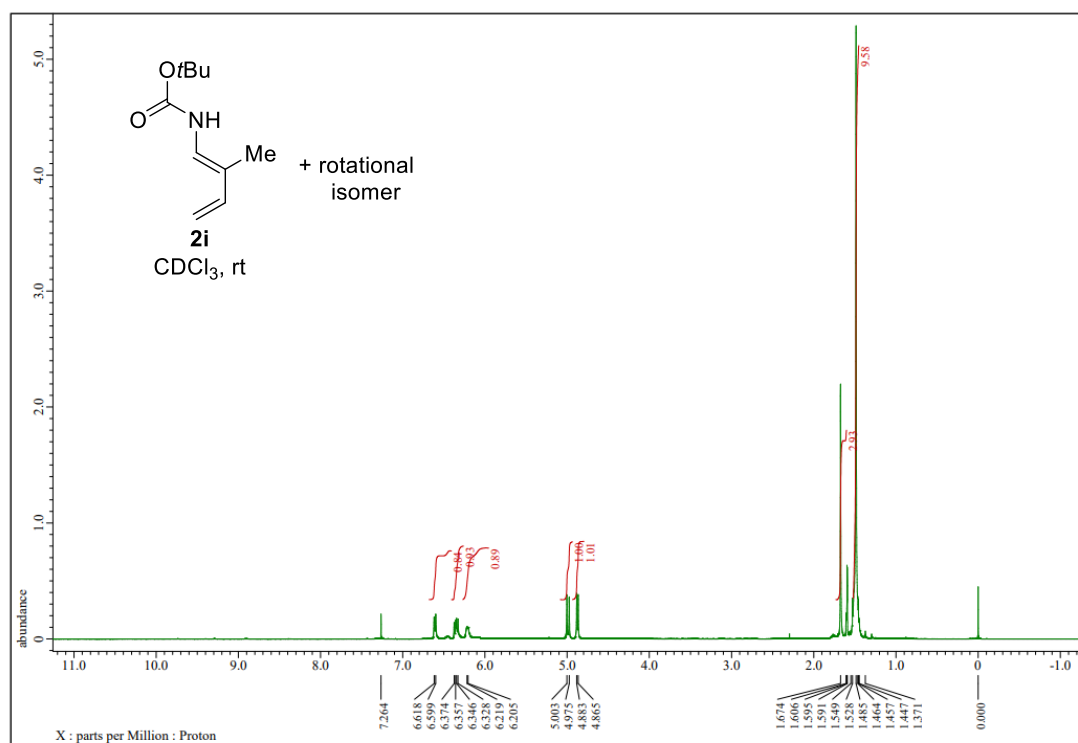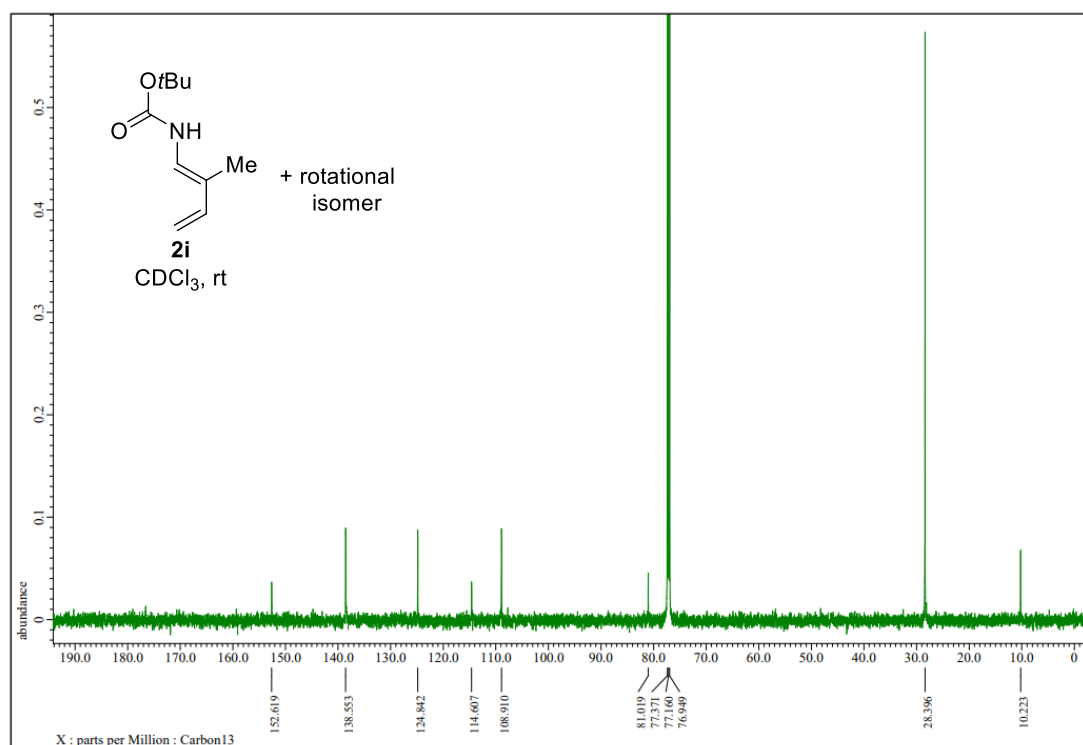

$^1\text{H}$ ,  $^{13}\text{C}$  and  $^{31}\text{P}$  NMR charts of **4d**.

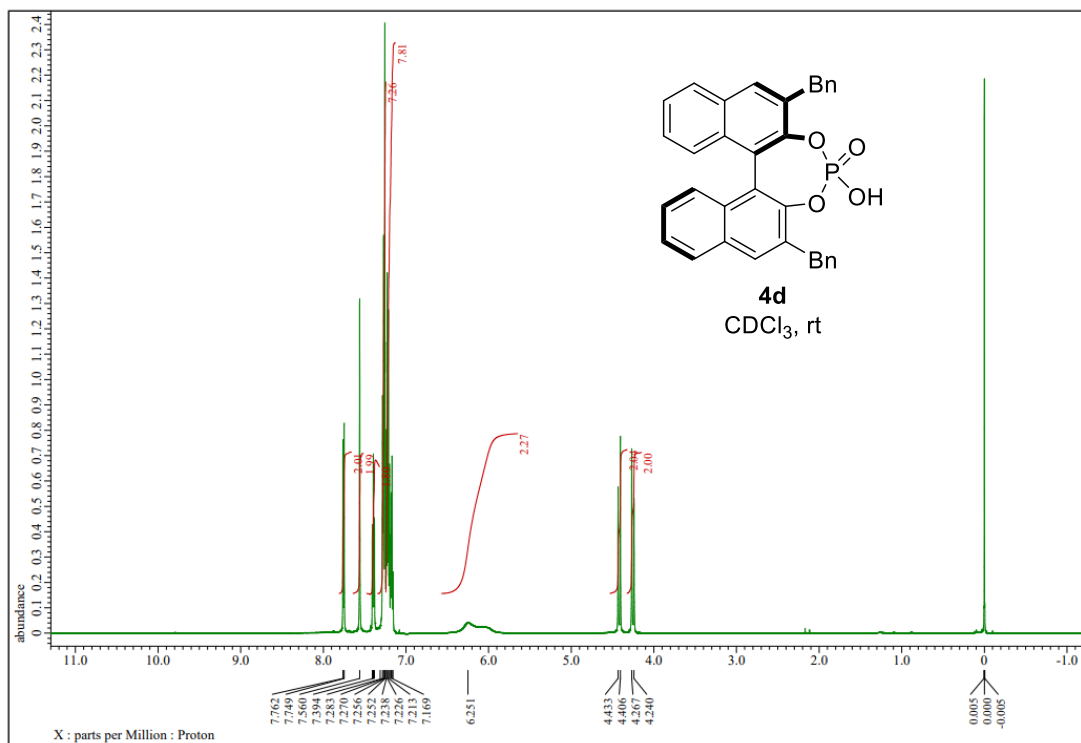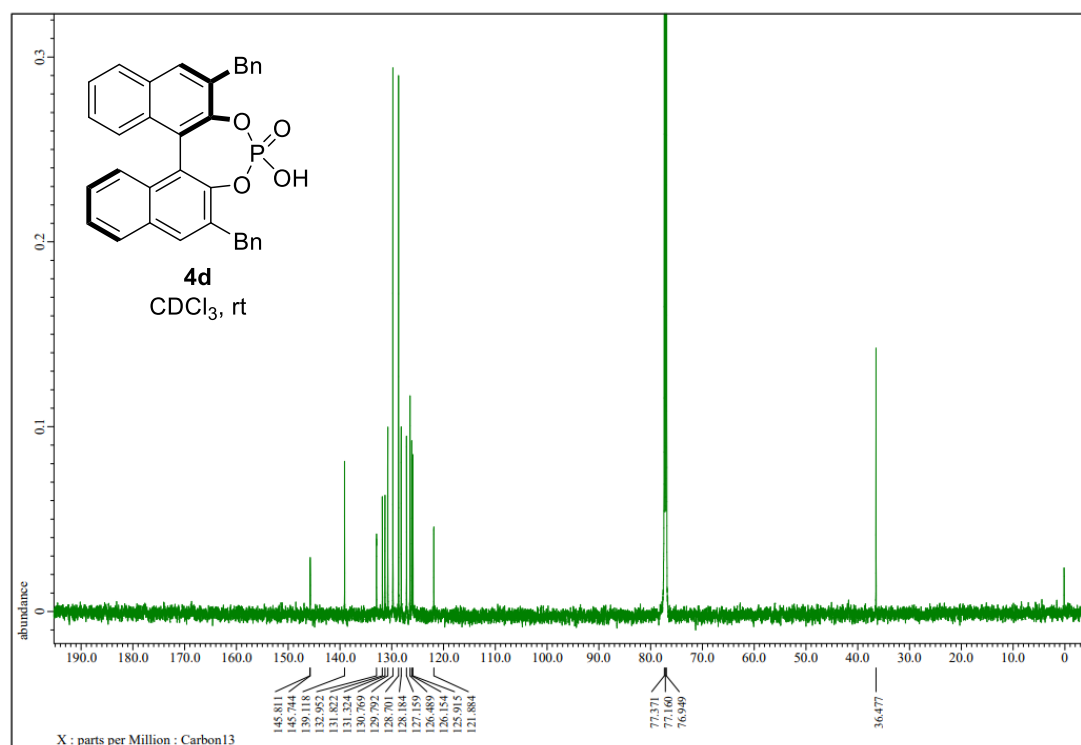

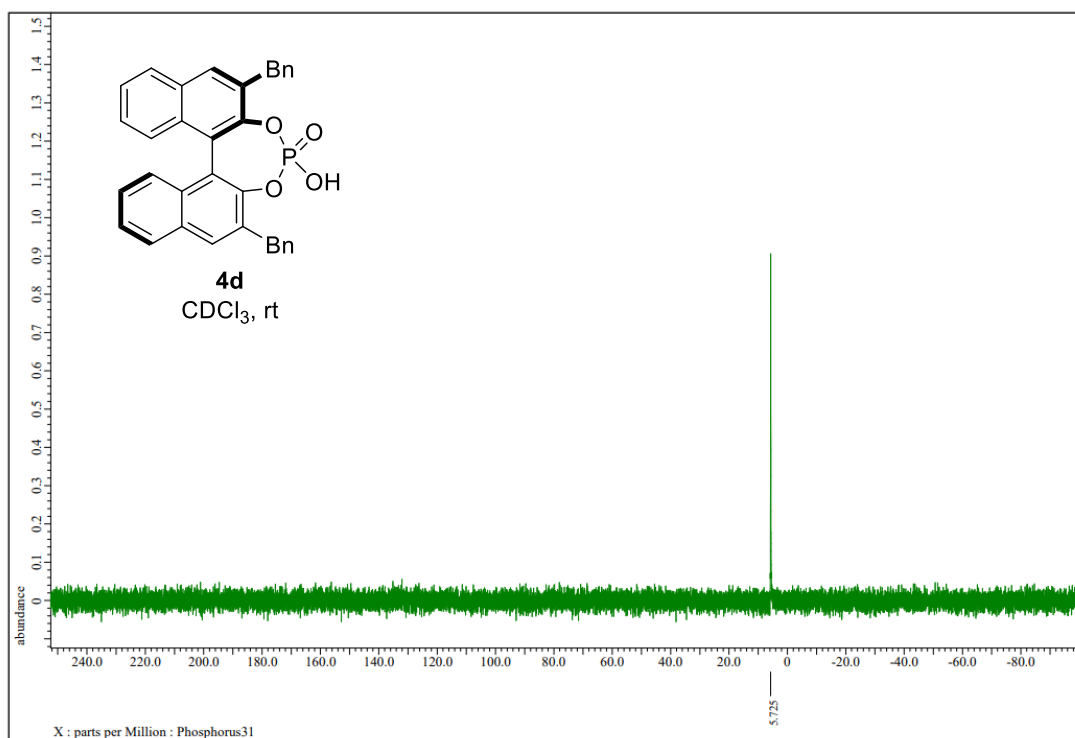

$^1\text{H}$  and  $^{13}\text{C}$  NMR charts of *exo*-3aa.

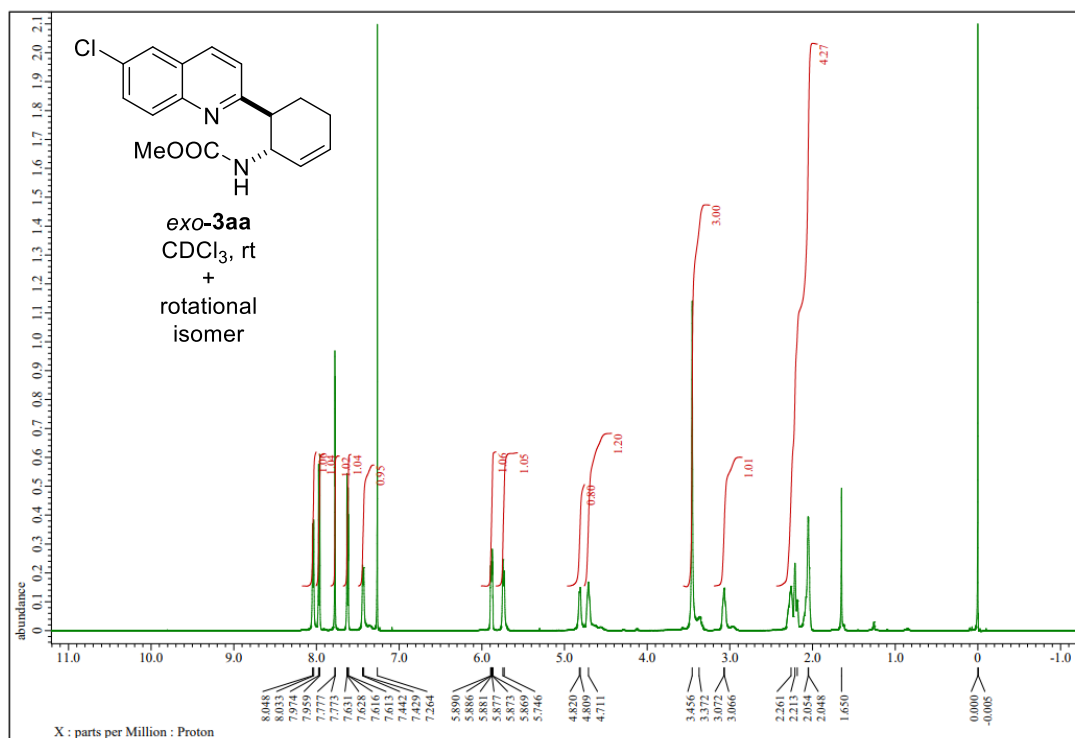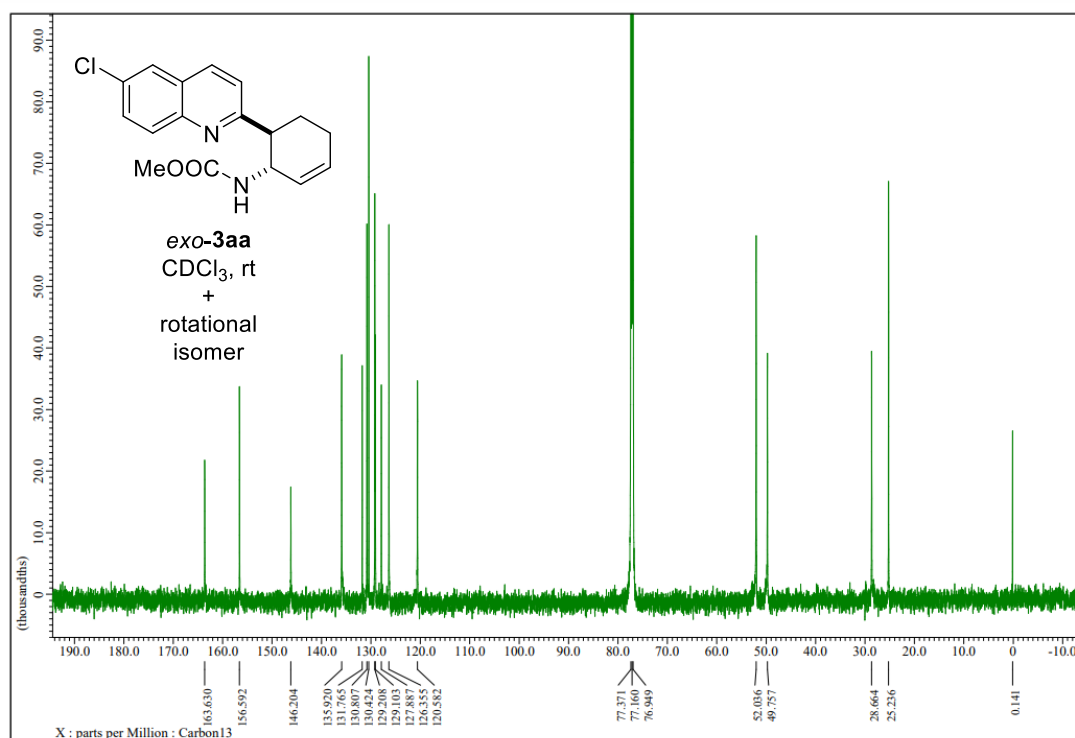

$^1\text{H}$  and  $^{13}\text{C}$  NMR charts of *endo-3aa*.

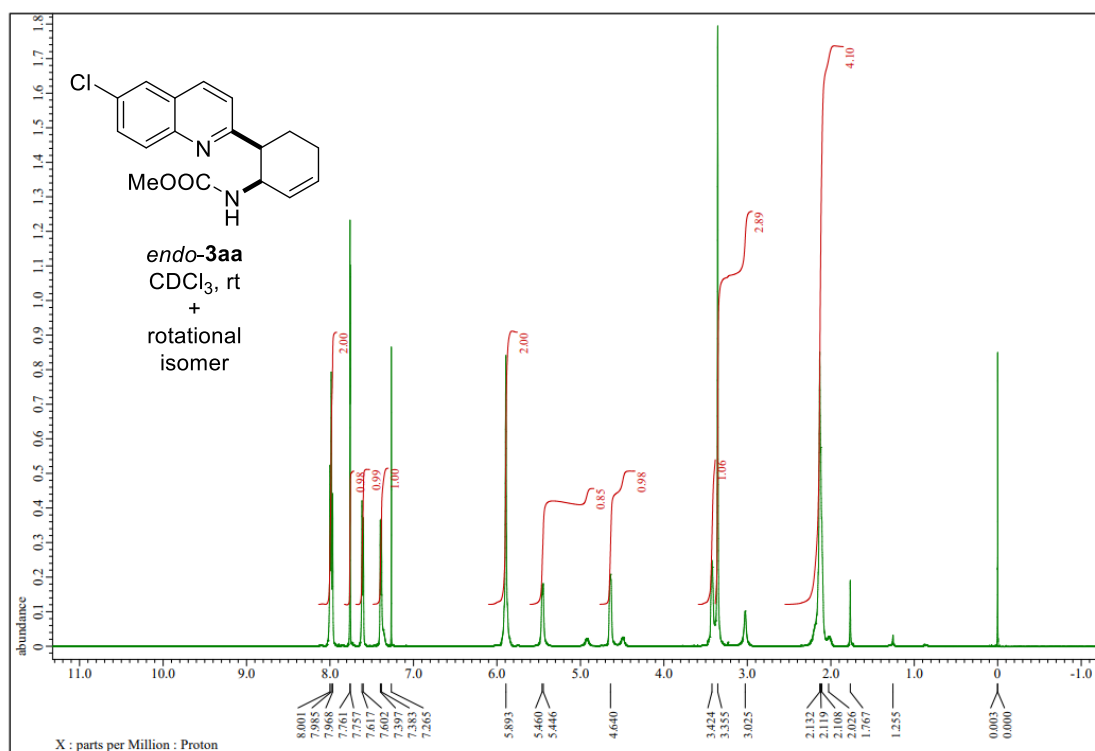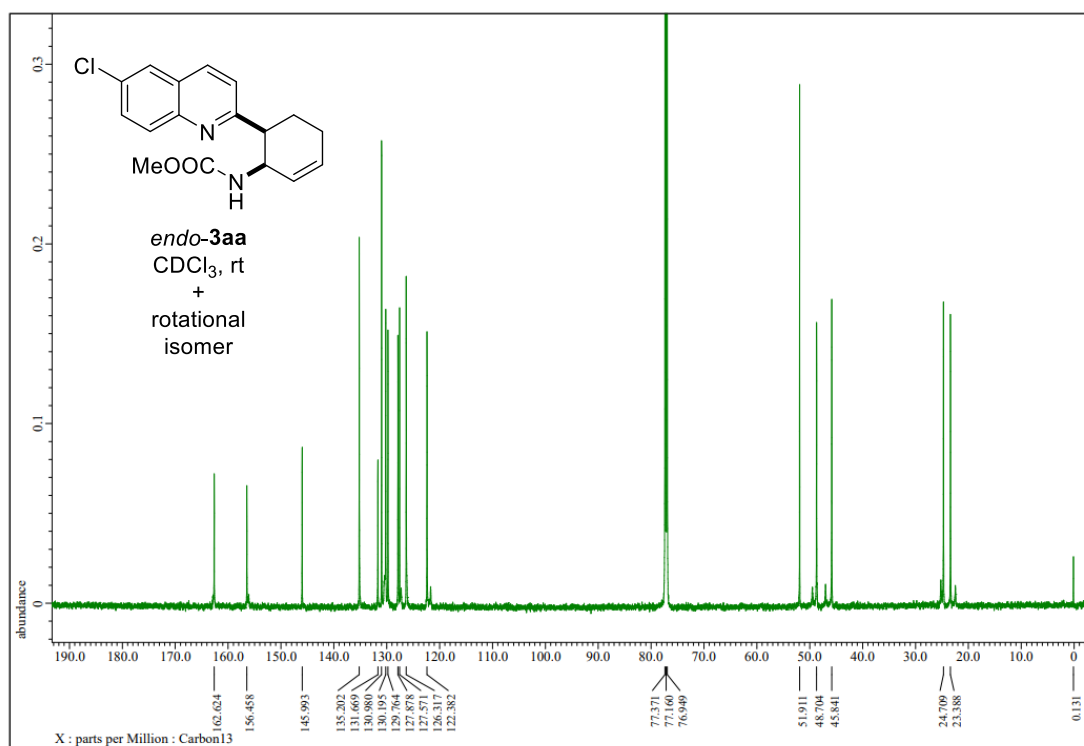

$^1\text{H}$  and  $^{13}\text{C}$  NMR charts of *exo-3ab*.

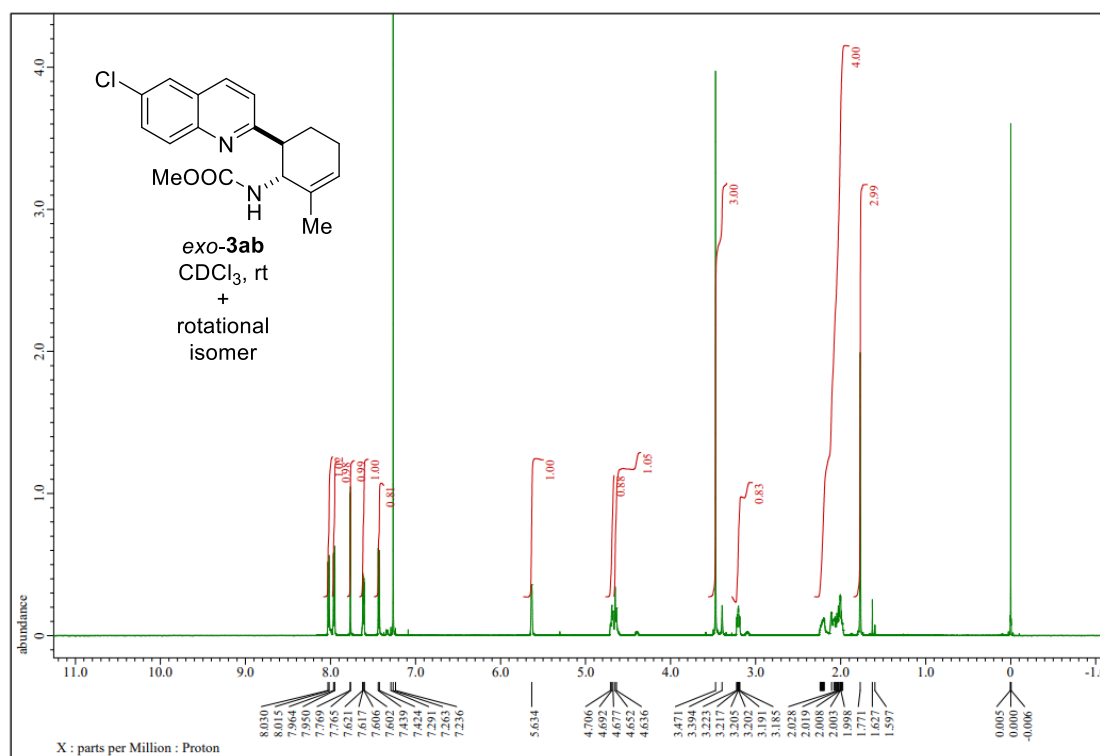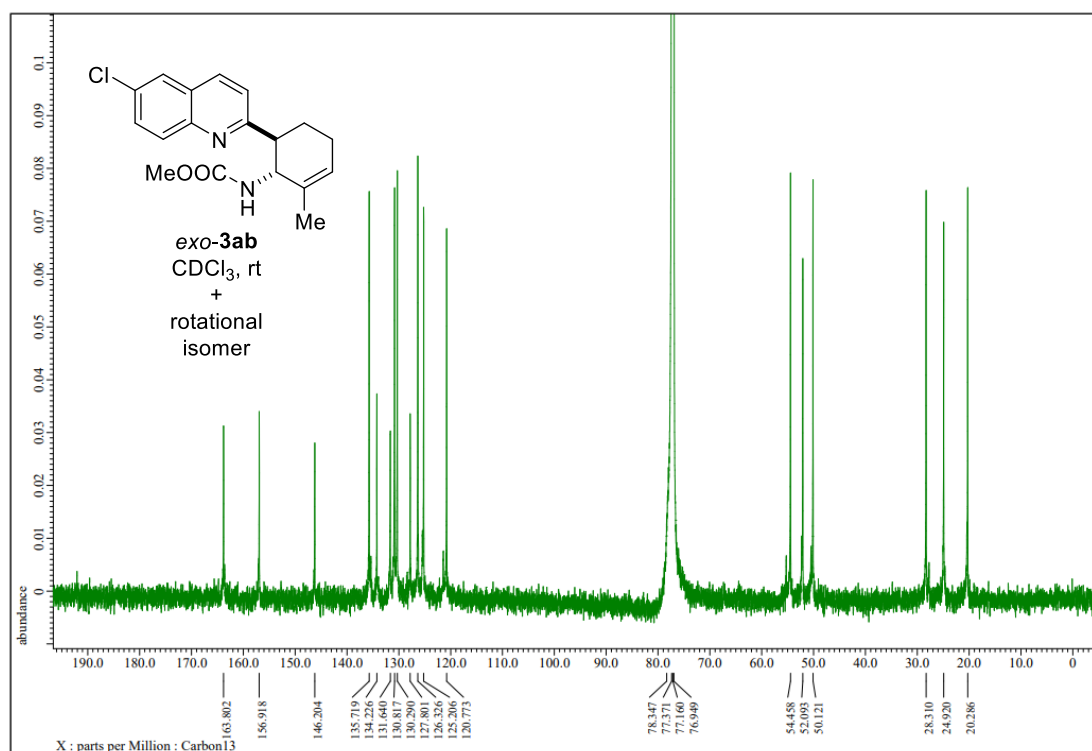

$^1\text{H}$  and  $^{13}\text{C}$  NMR charts of *endo*-**3ab**.

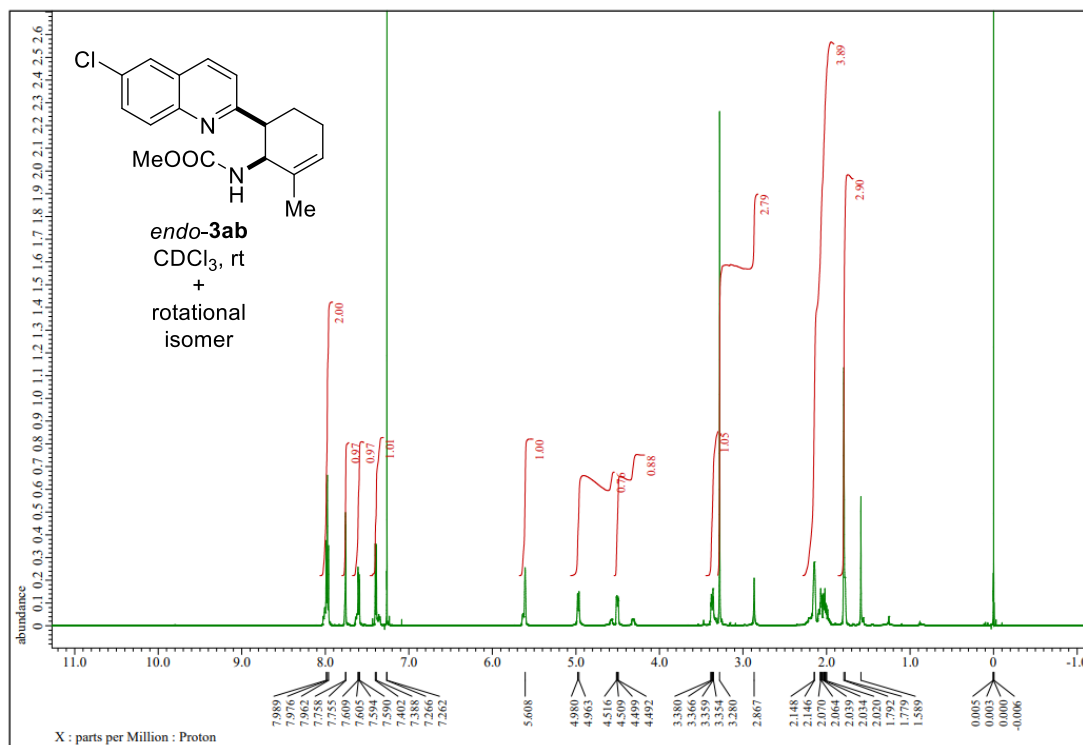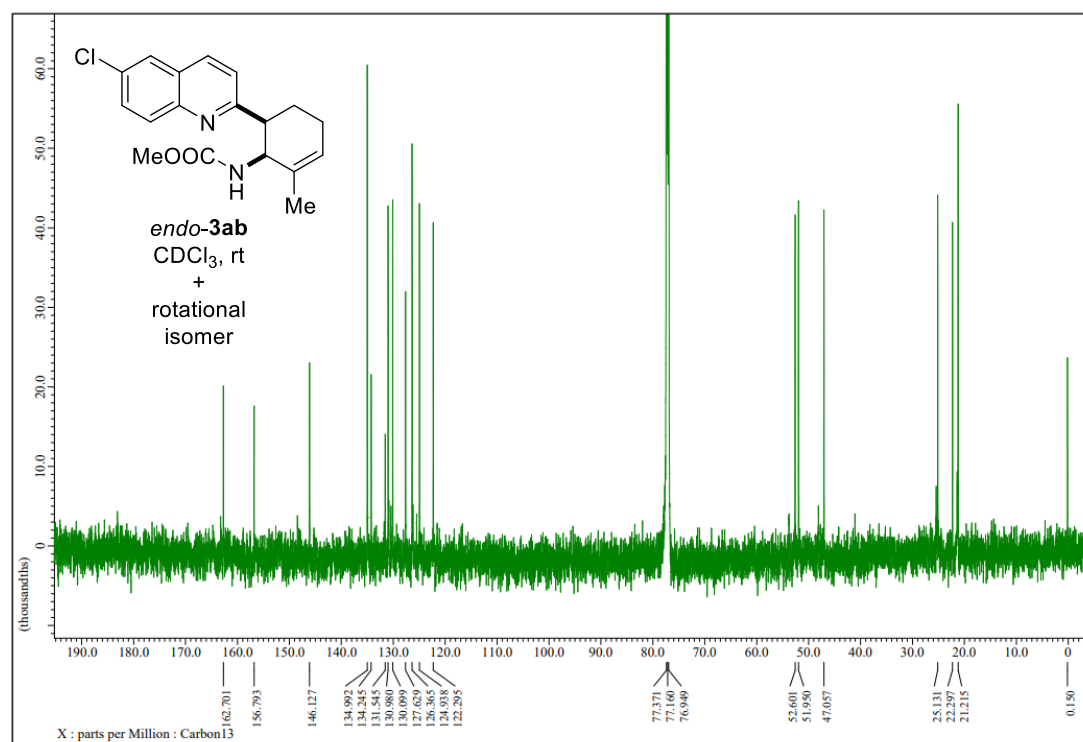

$^1\text{H}$  and  $^{13}\text{C}$  NMR charts of *exo*-3ag.

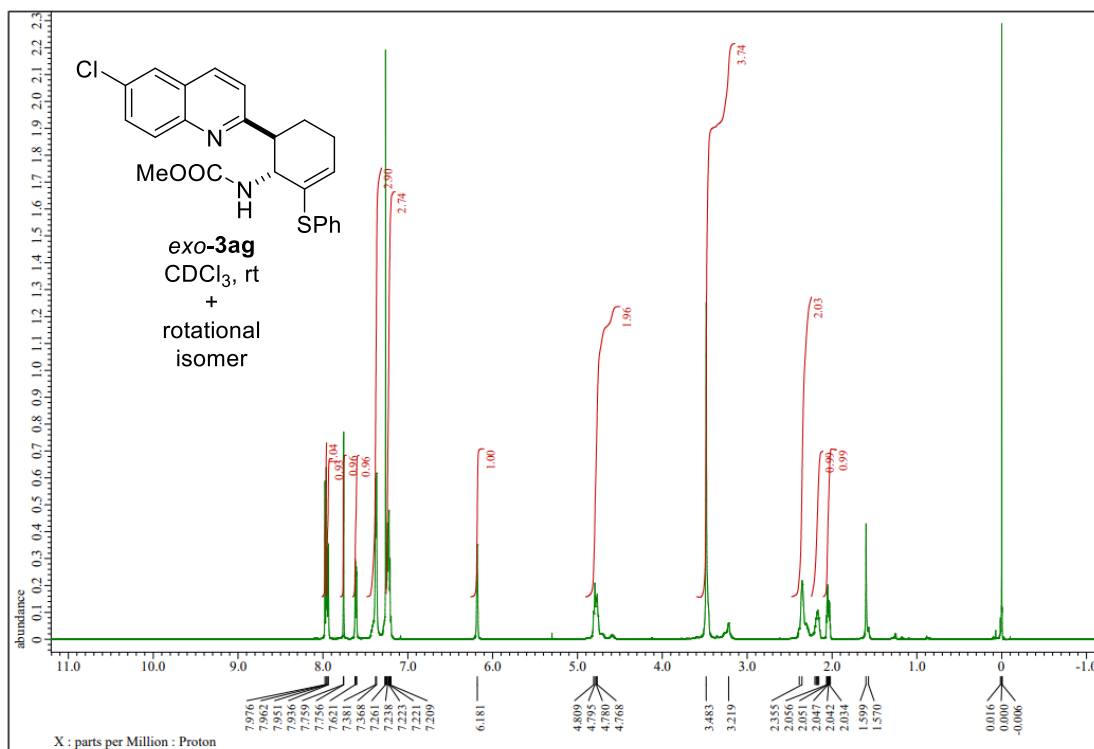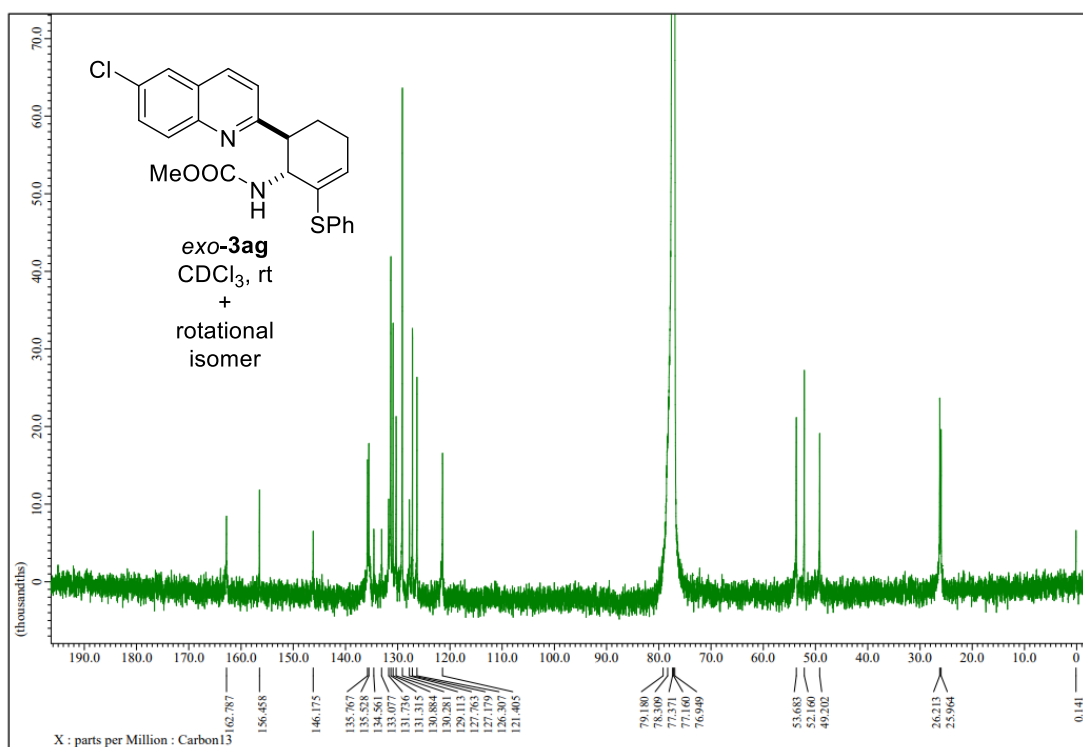



$^1\text{H}$  and  $^{13}\text{C}$  NMR charts of *endo-3ag*.

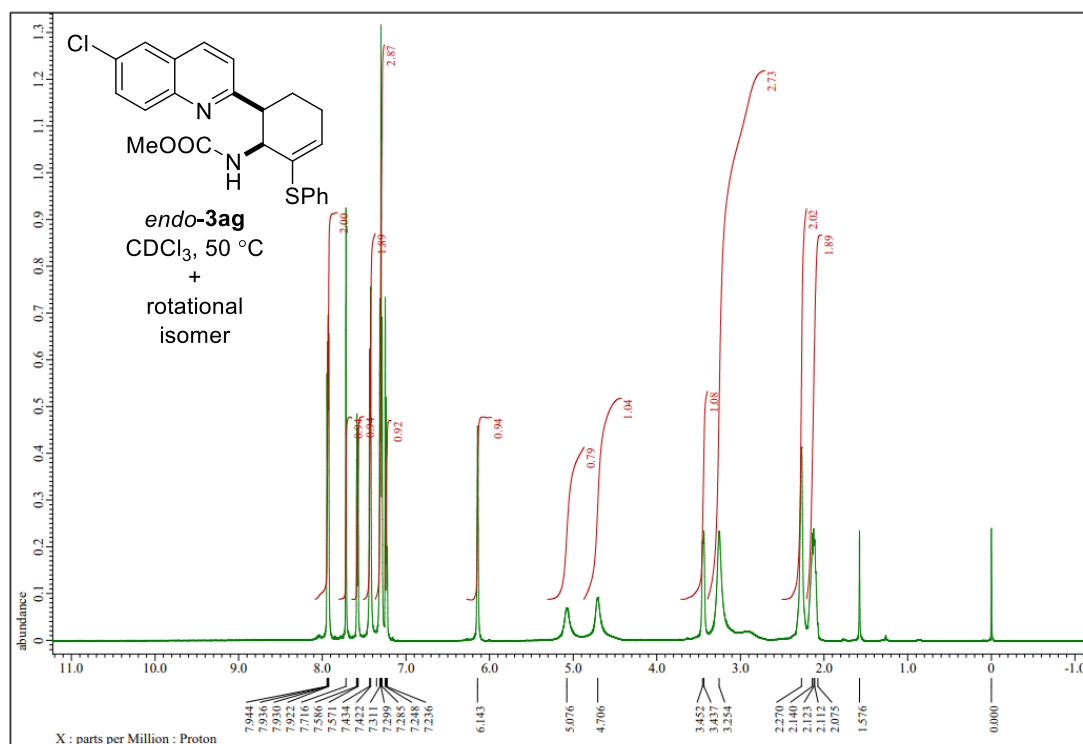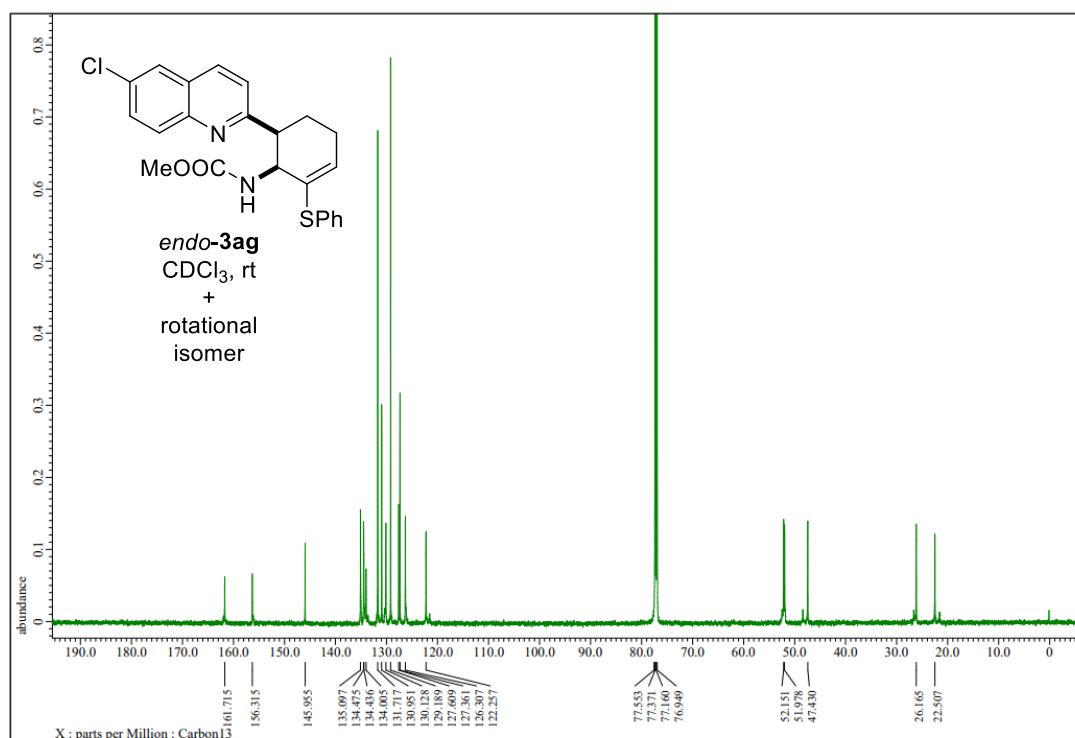

$^1\text{H}$  and  $^{13}\text{C}$  NMR charts of *exo*-3ah.

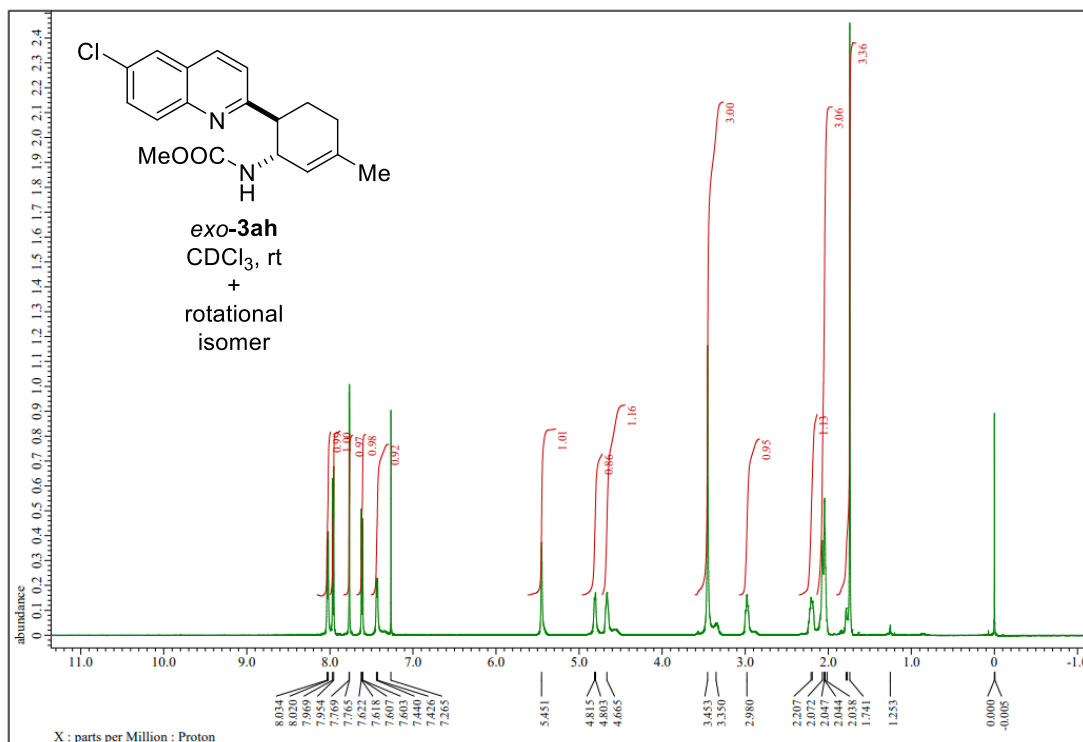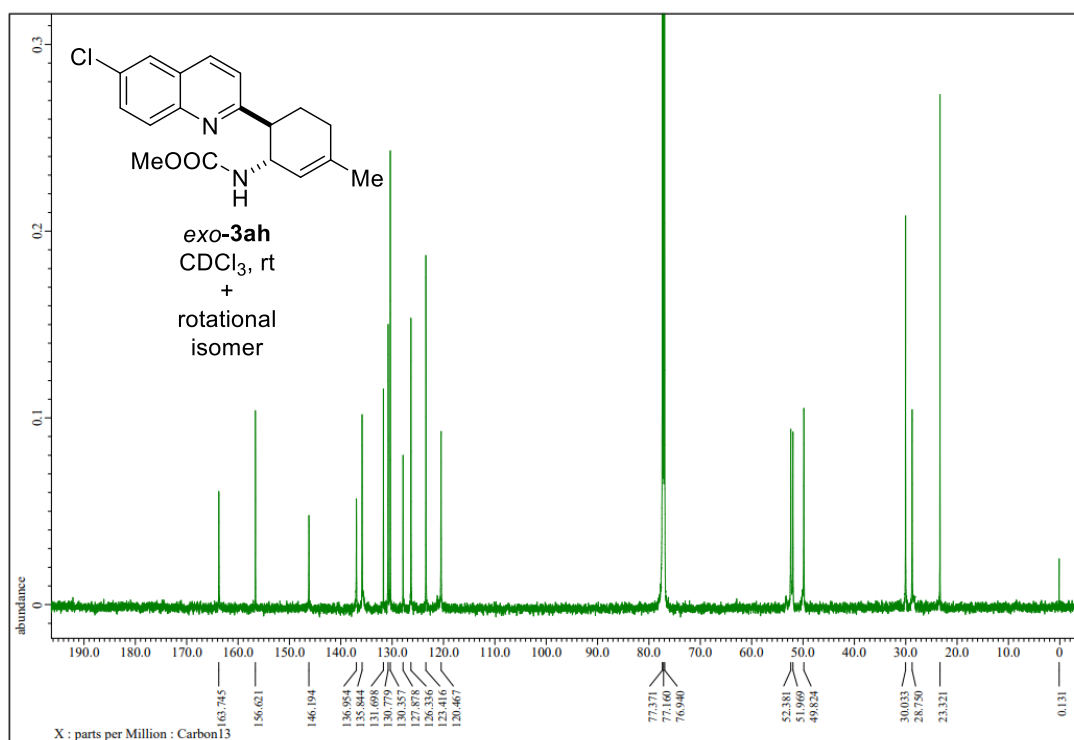

$^1\text{H}$  and  $^{13}\text{C}$  NMR charts of *endo*-3ah.

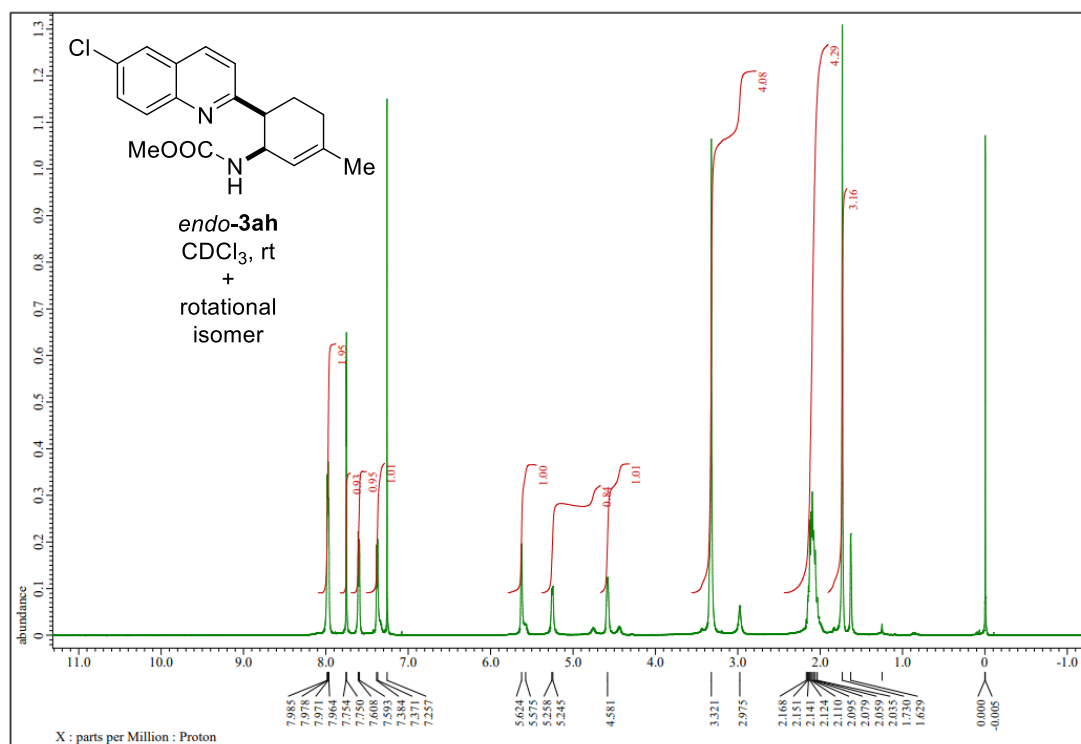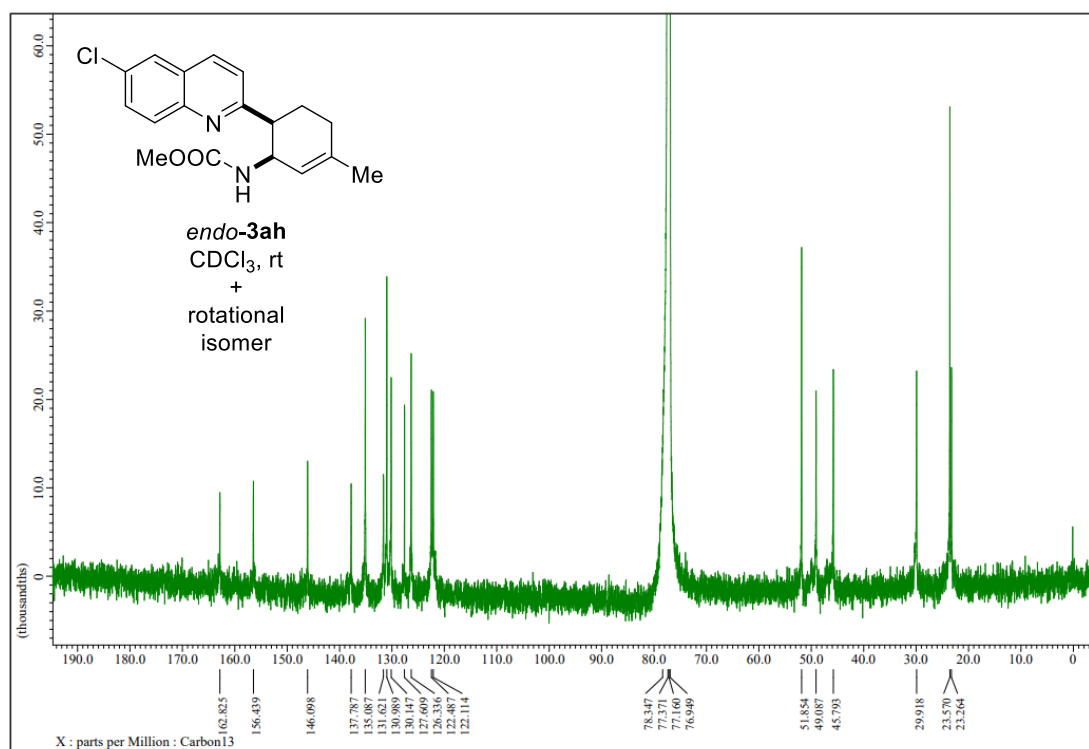

$^1\text{H}$  and  $^{13}\text{C}$  NMR charts of *exo*-3ai.

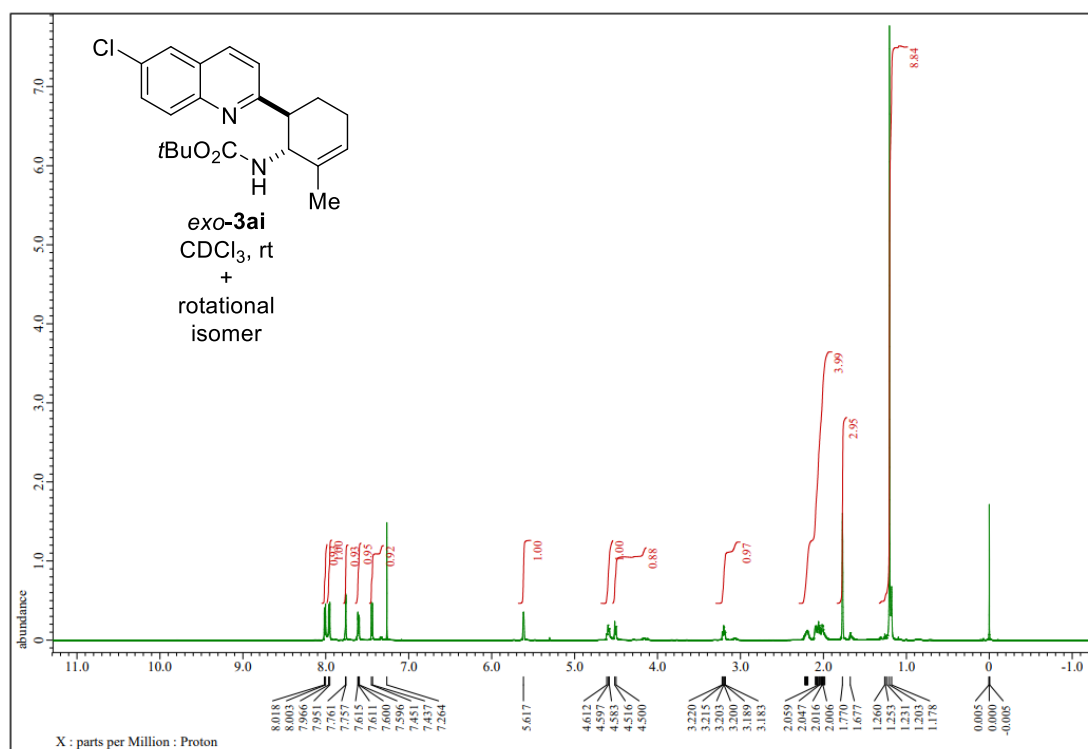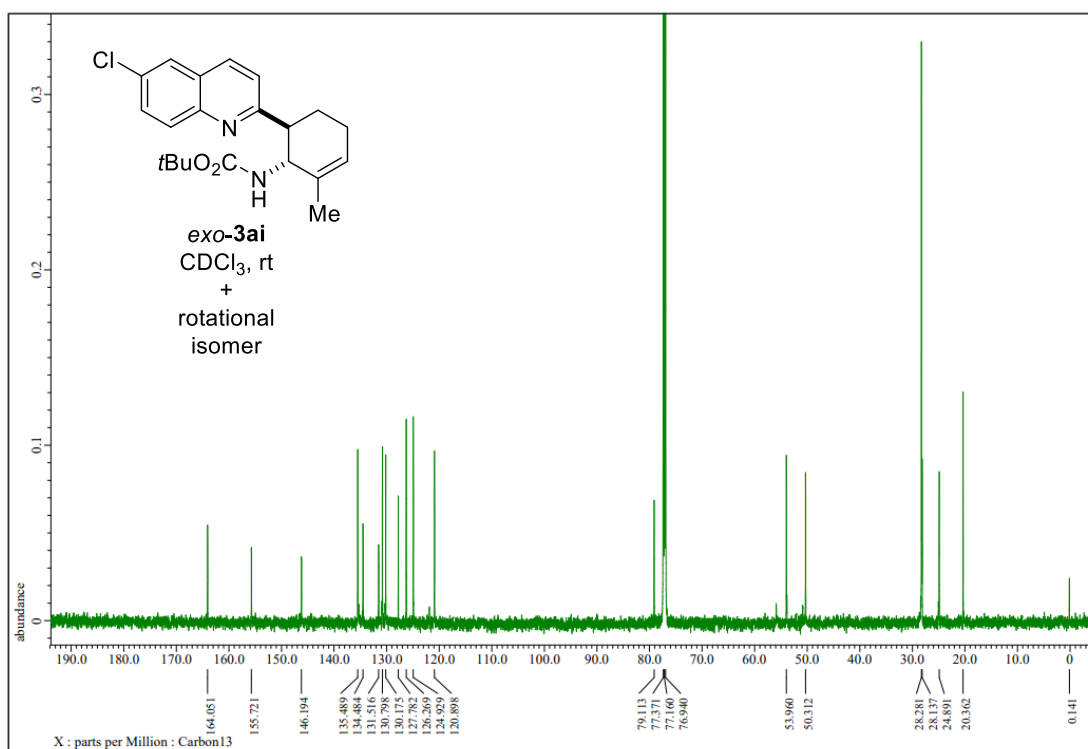

$^1\text{H}$  and  $^{13}\text{C}$  NMR charts of *endo*-**3ai**.

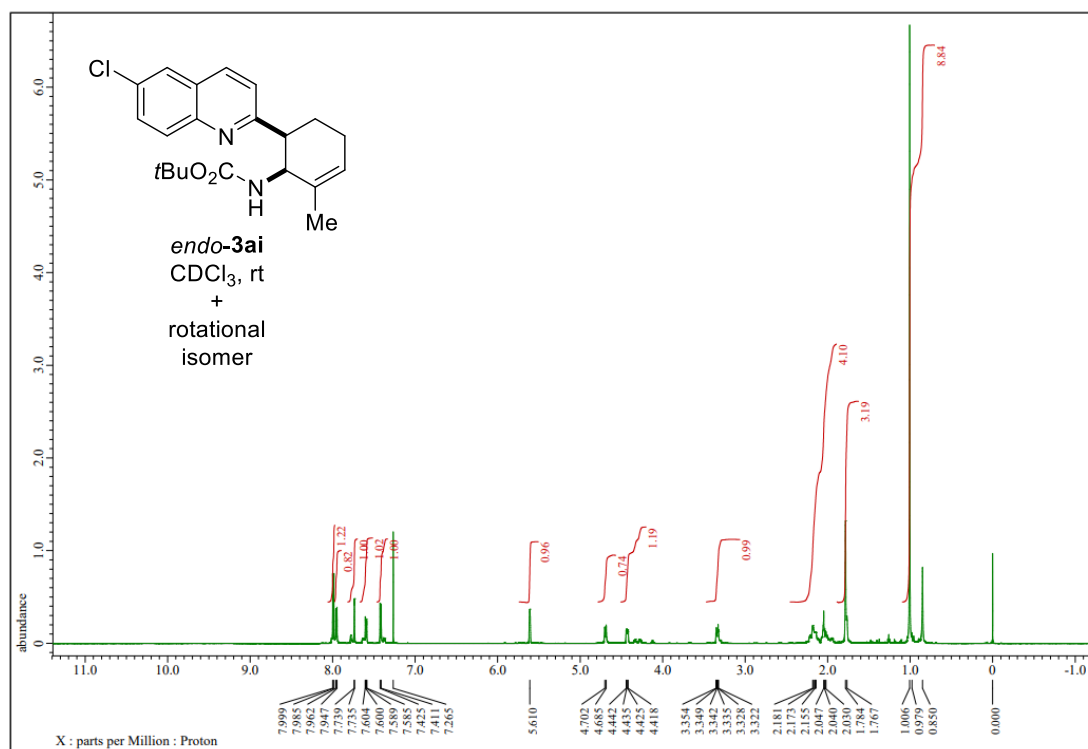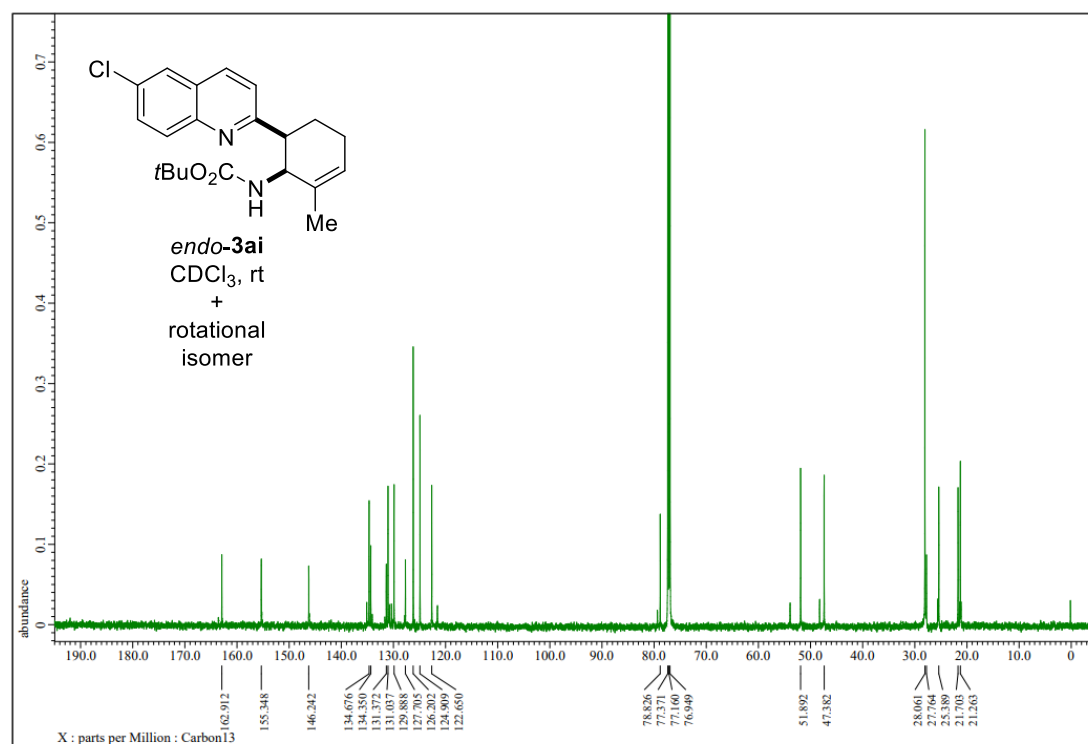

## 9. HPLC charts

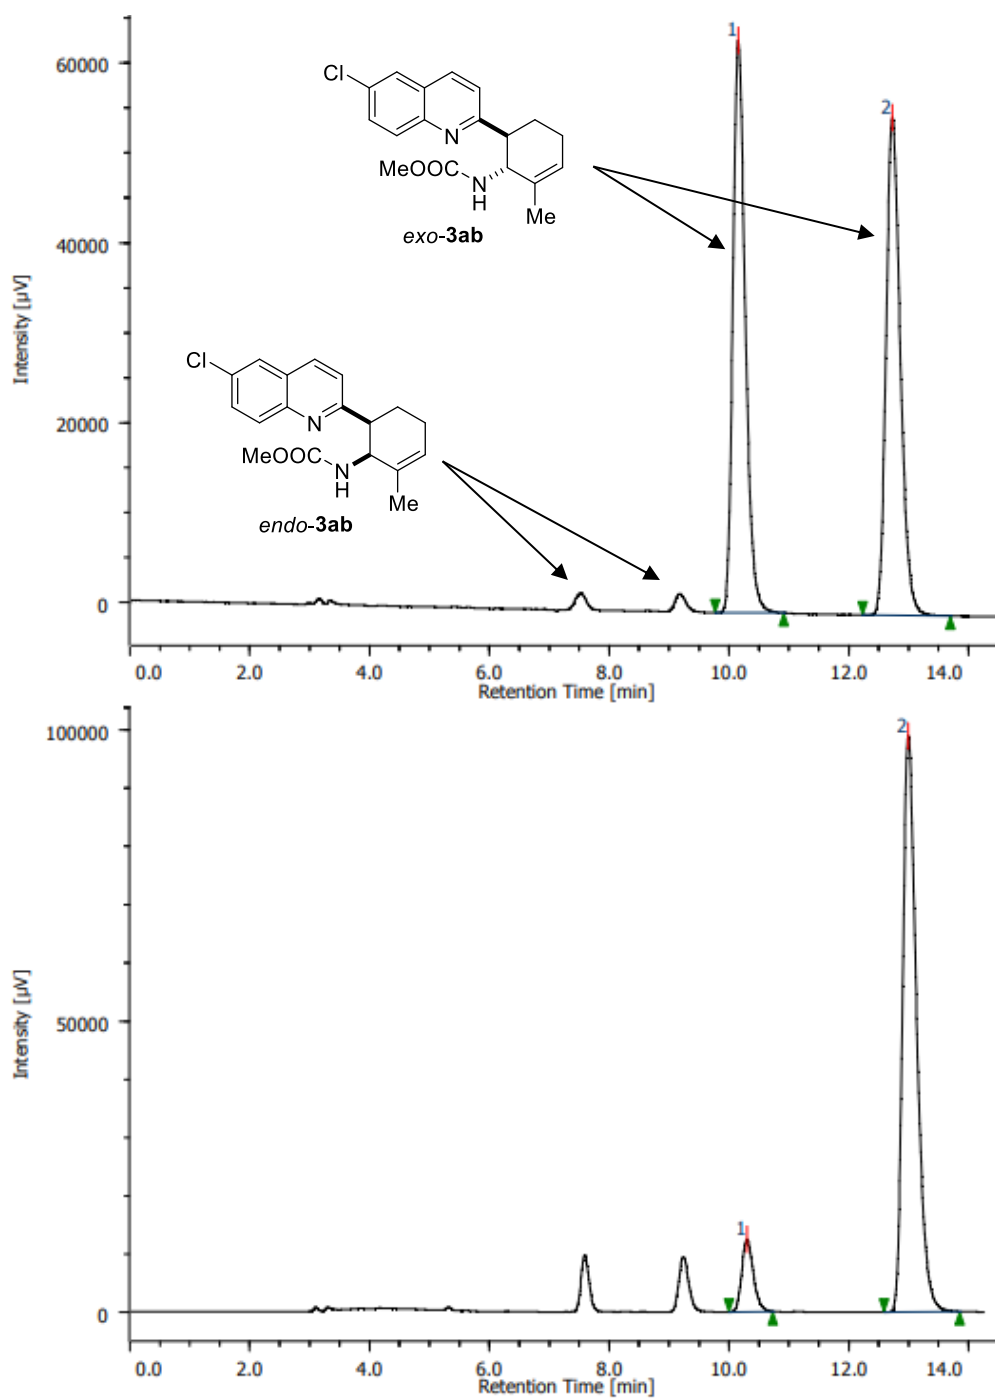

*exo-3ab*

| Peak                 | 1 ( <i>exo</i> ) | 2 ( <i>exo</i> ) |
|----------------------|------------------|------------------|
| Retention Time (min) | 10.3             | 13.0             |
| Area (%)             | 9.5              | 90.5             |
